# Supplementary material for: Single-cell multiomics analysis reveals SARS-CoV-2 inactivated vaccine-induced trained immunity modulated by epigenetic remodeling
Source: Research Square preprint supplement (doi:10.21203/rs.3.rs-3706251/v1), 2024-01-09
Supplement: Supplementary file 1 [file 0cd17a3bc7249f9a758f9d4d.pdf]

## Table of Content

|                                                                                                                            |    |
|----------------------------------------------------------------------------------------------------------------------------|----|
| Extended Data Fig. 1   Single-nucleus analysis quality control and cell type annotation for COVID-19 vaccine PBMC .....    | 2  |
| Extended Data Fig. 2   Expanded view of matched snRNA-seq and snATAC-seq for 42 samples .....                              | 4  |
| Extended Data Fig. 3   Cell types display distinct gene regulatory processes .....                                         | 5  |
| Extended Data Fig. 4   Co-expression patterns across timepoints .....                                                      | 7  |
| Extended Data Fig. 5   Shared and specific effects across timepoints .....                                                 | 9  |
| Extended Data Fig. 6   Significant gene functional enrichment shared by the time points considered in all cell types ..... | 10 |
| Extended Data Fig. 7   Peak-to-gene links identified in the each participants .                                            | 11 |
| Extended Data Fig. 8   Regulational network for chromatin remodeling in myeloid sub-celltype .....                         | 13 |
| Extended Data Fig. 9   Gene transcription patterns of CD14 <sup>+</sup> monocytes .....                                    | 15 |



- b.** Fragment lengths indicating nucleosomal periodicity in aggregated single-nucleus profiles from 10x snATAC-seq based samples.
- c.** The enrichments of normalized Tn5 transposase insertions around the transcription start sites (TSSs) of 10x snATAC-seq based samples.
- d.** Hierarchical clustering visualization of the output from light HIPPO analysis.
- e.** Dot plots of gene expression for populations shown in Fig. 1a where the color is scaled by mean expression and the dot size is proportional to the percent of the population expressing the gene.
- f.** Dot plots of gene expression for populations shown in S1.d where the color is scaled by mean expression and the dot size is proportional to the percent of the population expressing the gene.
- g.** Tile plot showing the percentage concordance between COVID-19 PBMC annotation (x-axis) and Azimuth reference-based annotation tool (y-axis) (<https://satijalab.org/azimuth/>).

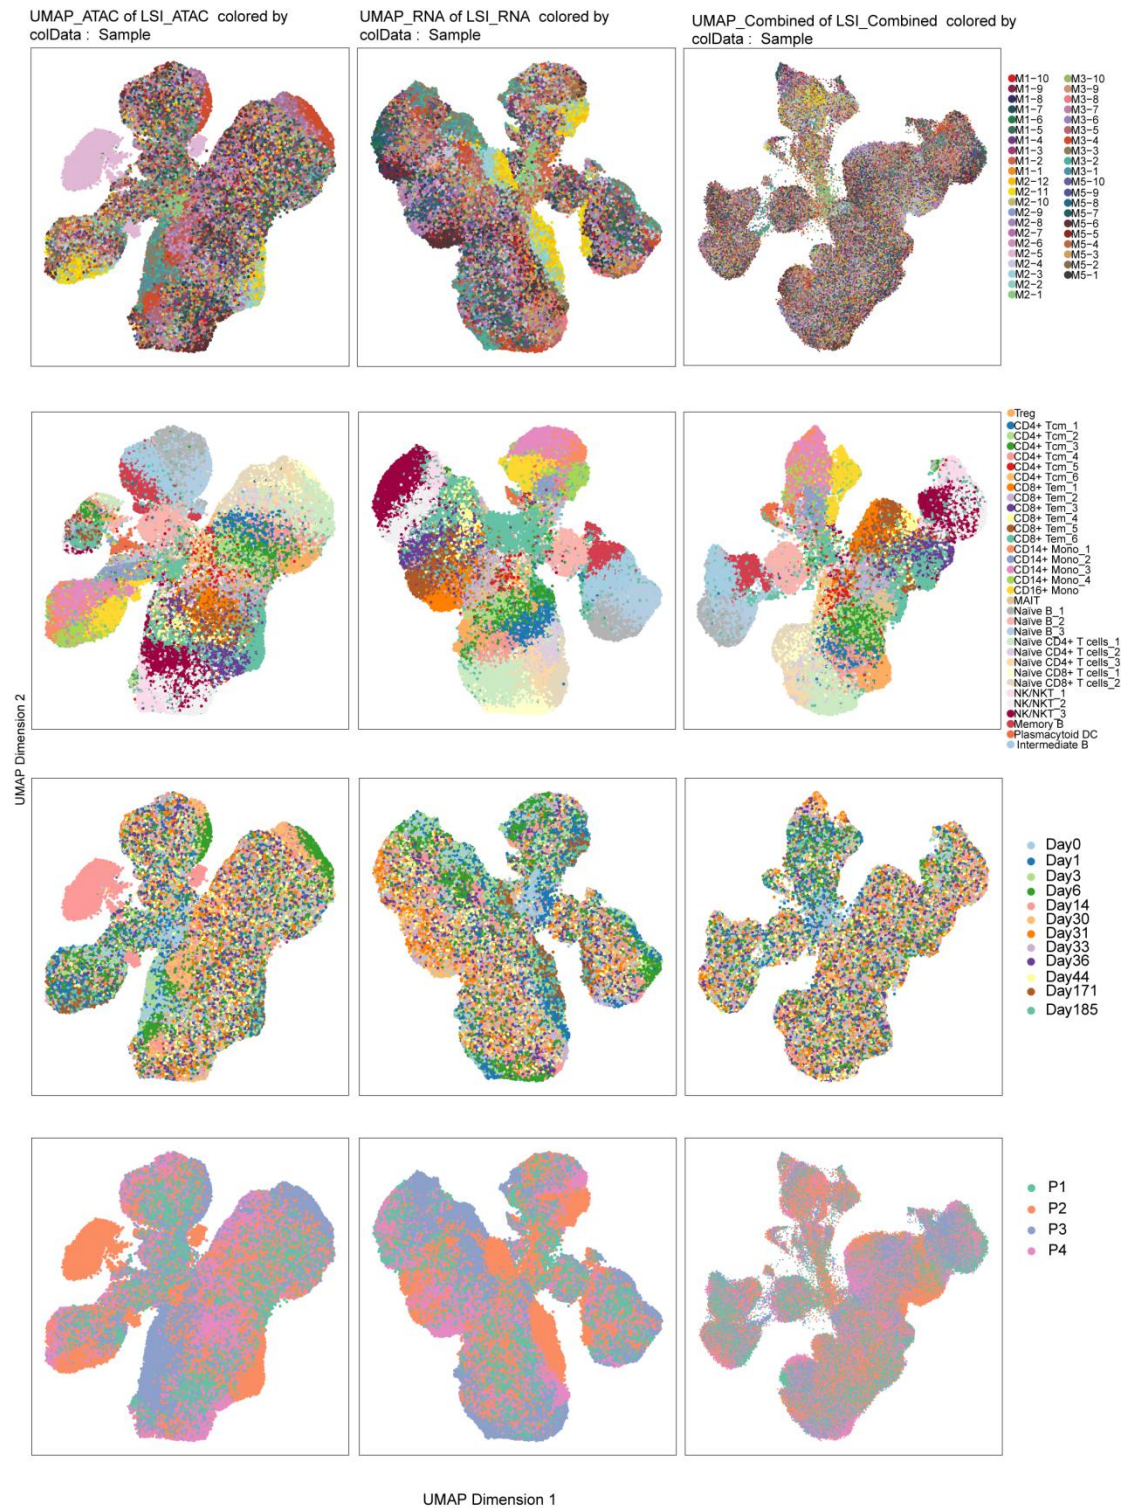

**Extended Data Fig. 2 | Expanded view of matched snRNA-seq and snATAC-seq for 42 samples**

UMAP visualizations where dots correspond to individual nuclei for nuclei profiled with snRNA-seq (left column), snATAC-seq (middle column), and integrated (right column), colored by sample, annotation, timepoints, and participants.



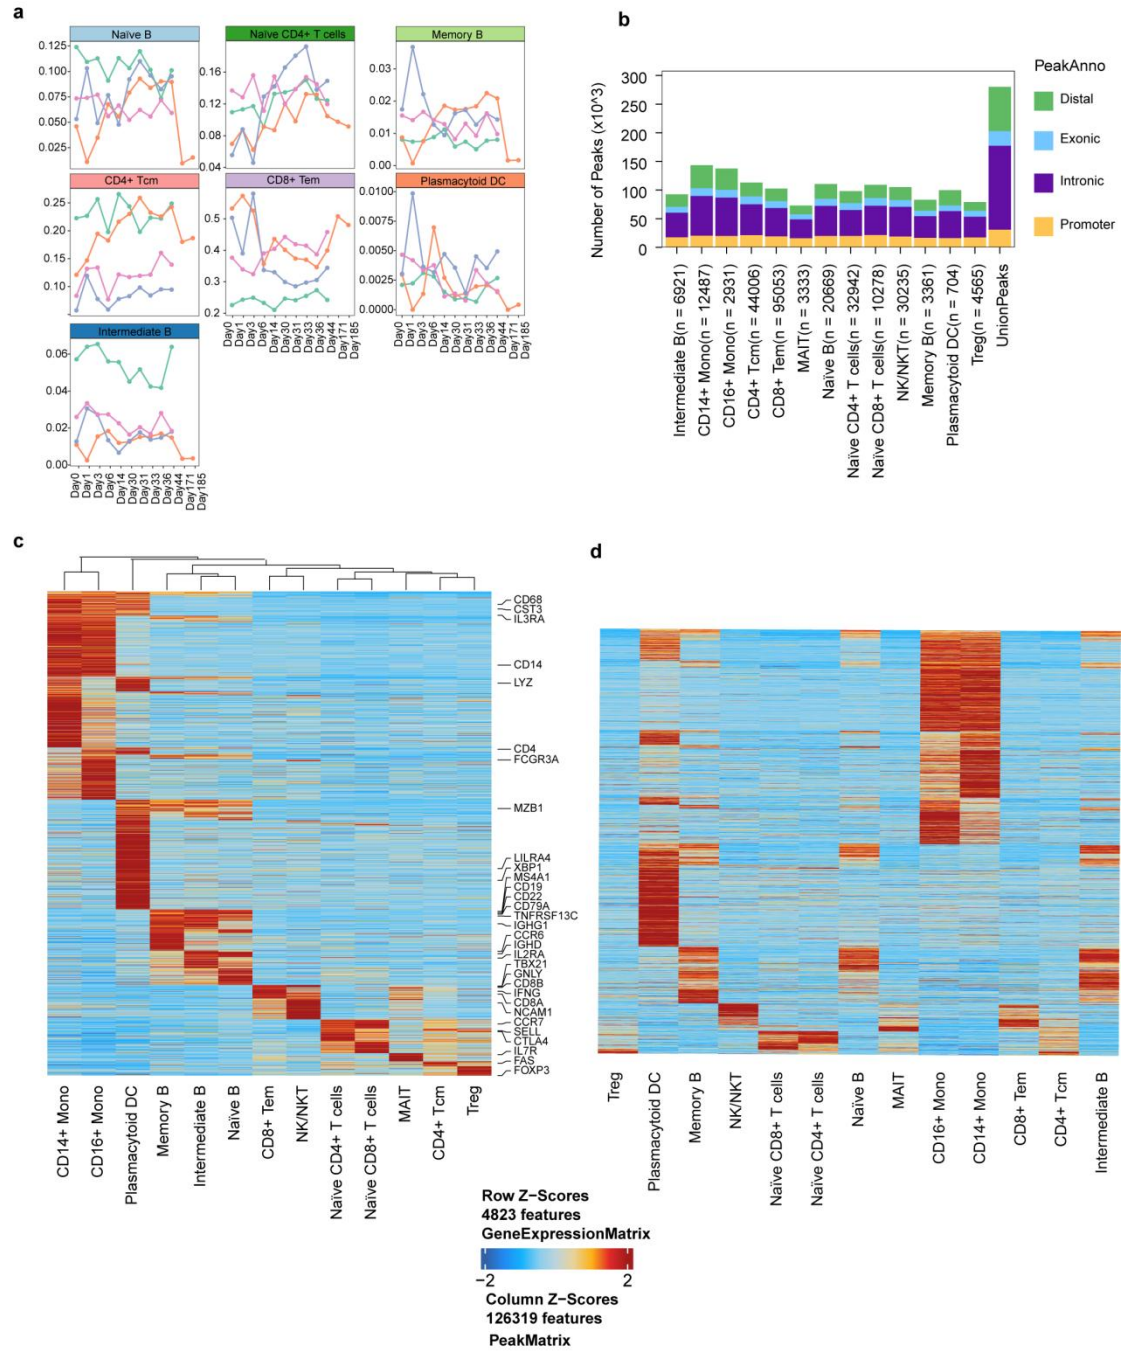

### **Extended Data Fig. 3 | Cell types display distinct gene regulatory processes**

- a.** Line chart of the proportion of cell types, separated by time points and participants.
- b.** Number of peaks in each cell type. Peaks were annotated into distal, exonic, intronic and promoter.
- c.** Heatmap of PBMC cell-type marker genes ( $n = 5,121$ ) across each cell type calculated from snRNA-seq gene expression. each row represents a unique marker gene. The color represents the normalized gene score of the marker genes in cell types.
- d.** Heatmap reflecting PBMC cell-type marker peaks that highlight CREs specific to only one or very limited cell types. each column represents an individual marker peak. The color represents the normalized marker peak accessibility in cell types.

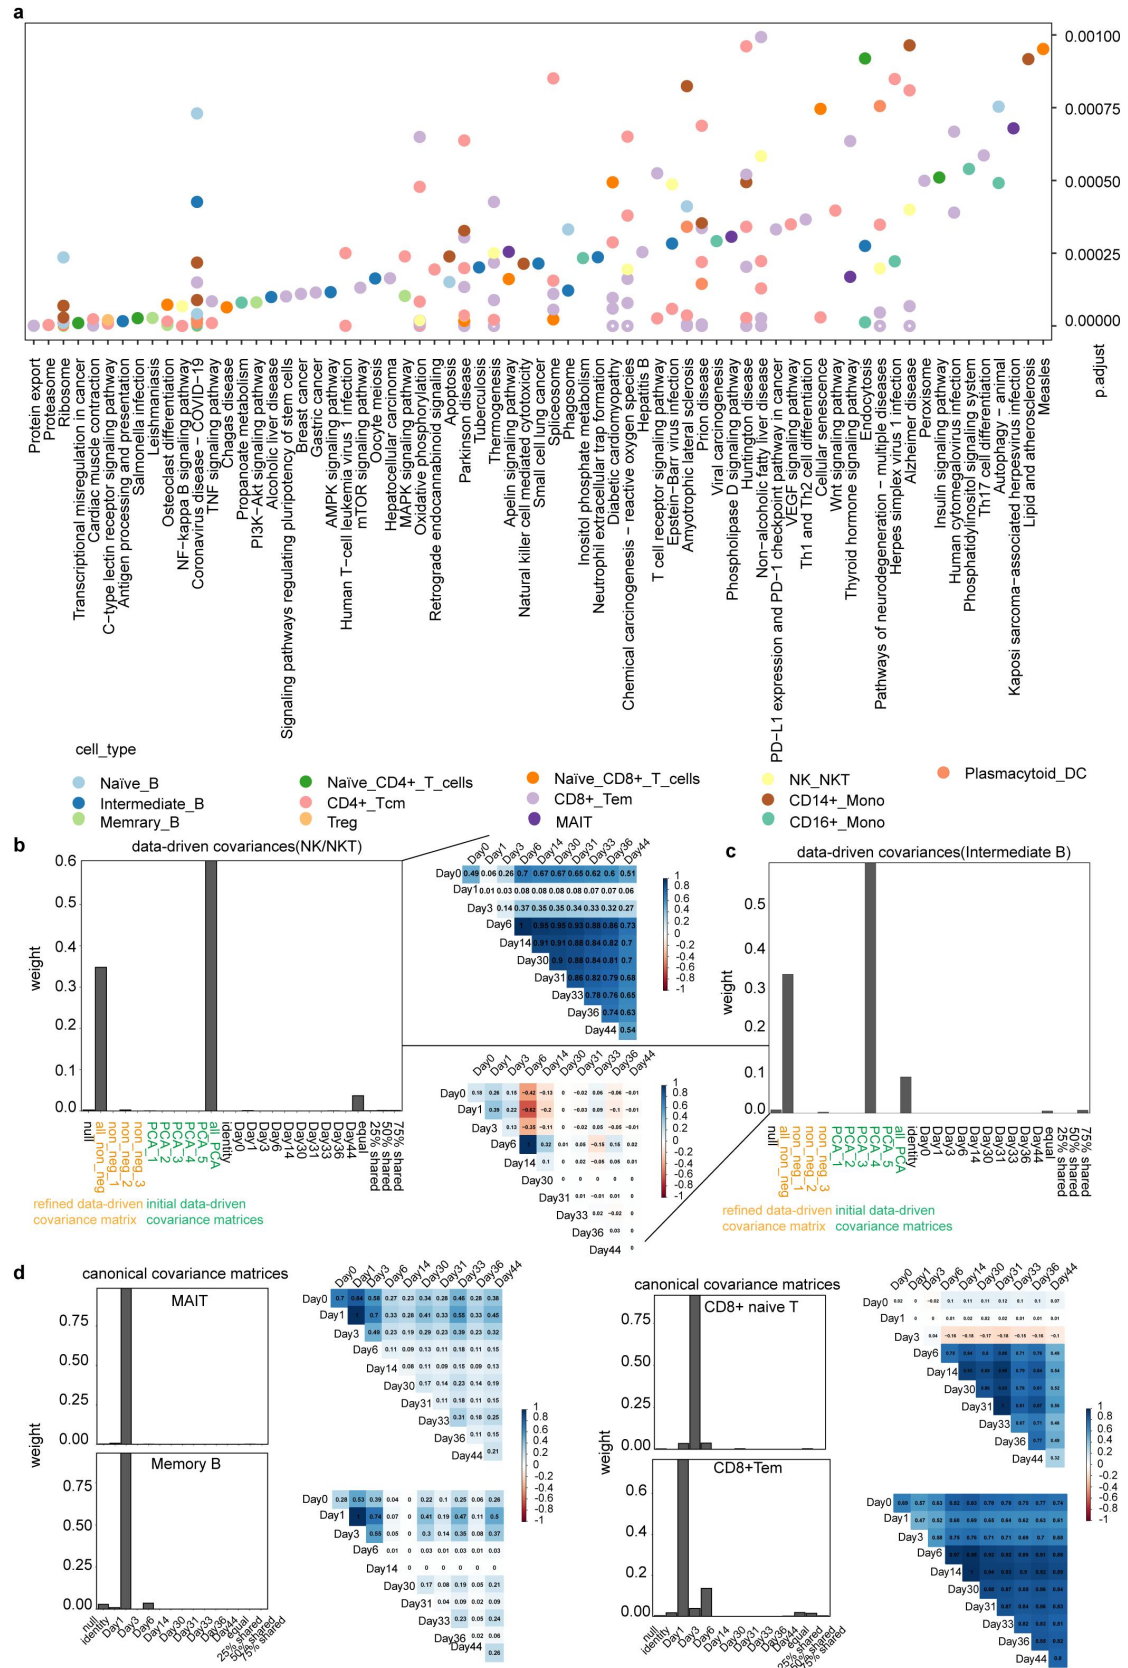

#### **Extended Data Fig. 4 | Co-expression patterns across timepoints**

- a.** Kyoto (KEGG) enrichment analysis for all gene sets derived from the co-expression analysis in each cell type. The values on the x-axis indicate the p adjust value (p.adjust-value of  $\leq 0.001$ ). Solid circles indicate that the fold enrichment ratio  $\geq 2/3$ . The numerator is the number of genes enriched on this GO entry, the denominator is the number of all entered genes for enrichment analysis.
- b.** Mashr estimates weight in NK cells for both the canonical matrix and the data-driven matrix, capturing the proportion of each effect pattern (left). Identity represents the independent effect across all conditions; Dayn indicates Dayn specific effects; equal\_effects represent patterns that are equal in all conditions. Heatmap of the covariance matrix corresponding to the dominant mixture component identified by mash (right).
- c.** Mashr estimates weight in intermediate B cells for both the canonical matrix and the data-driven matrix (right). Heatmap of the covariance matrix corresponding to the dominant mixture component identified by mash (left).
- d.** Mashr estimates weight in MAIT, memory B, CD8<sup>+</sup> naive T and CD8<sup>+</sup> Tem.



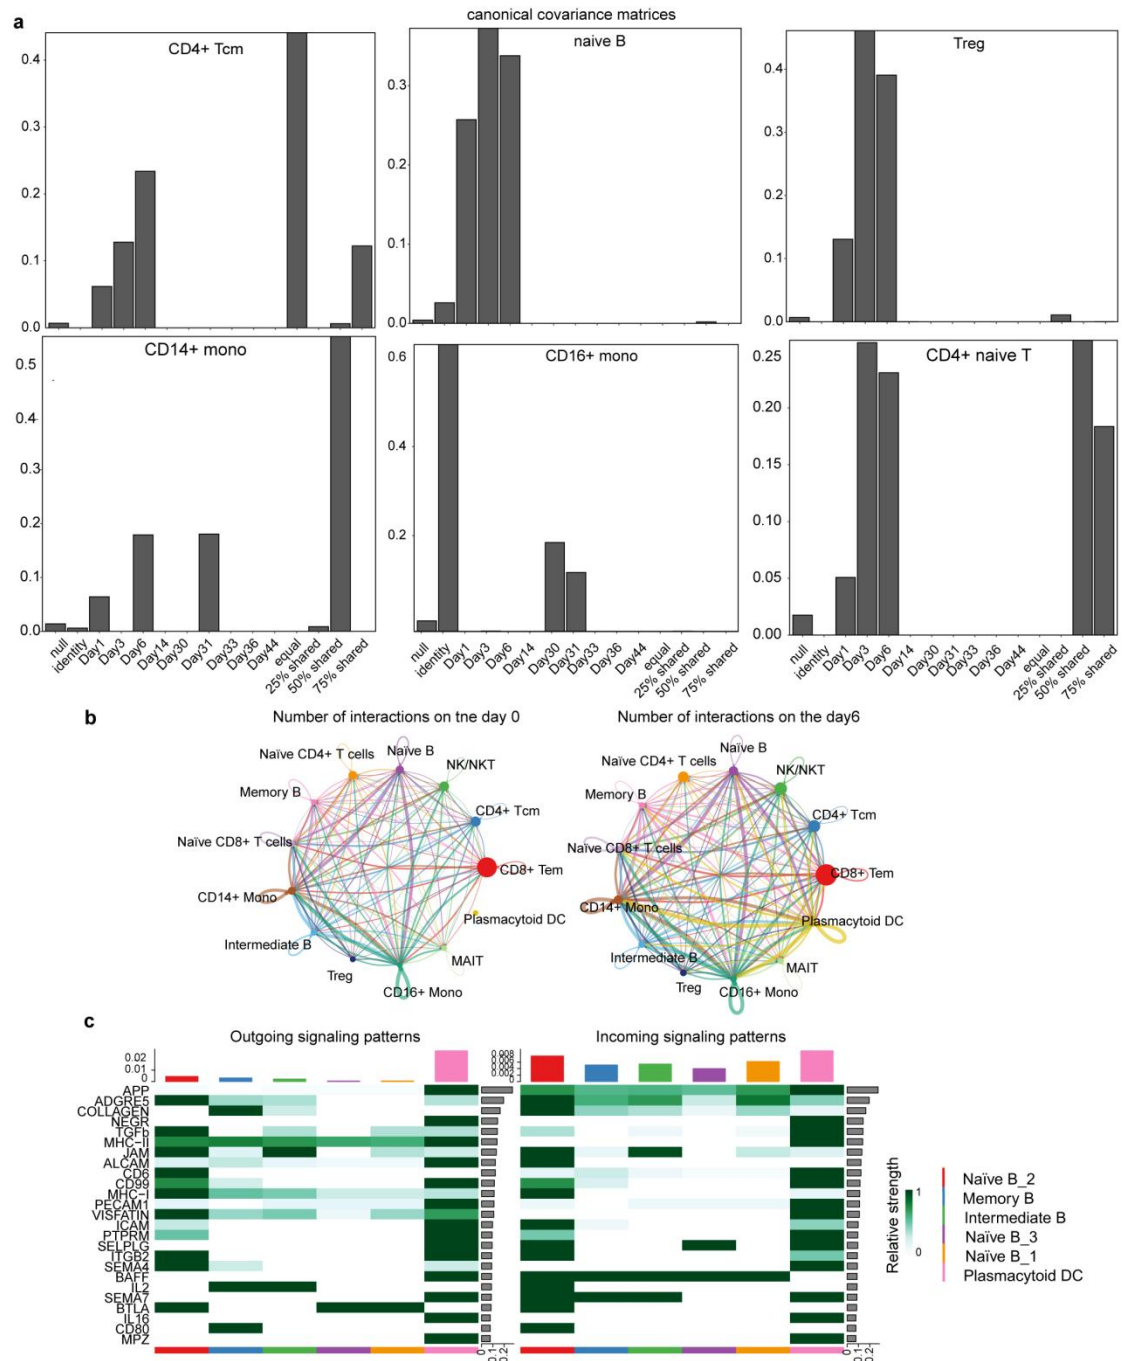

**Extended Data Fig. 5 | Shared and specific effects across timepoints**

- Mashr estimates weight in different cell types.
- The number of ligand-receptor interactions going between the different cell types to, analyzed by CellChat.
- Heatmap shows the relative strength of each signal pathway network for each cluster with both incoming and outgoing signaling patterns.

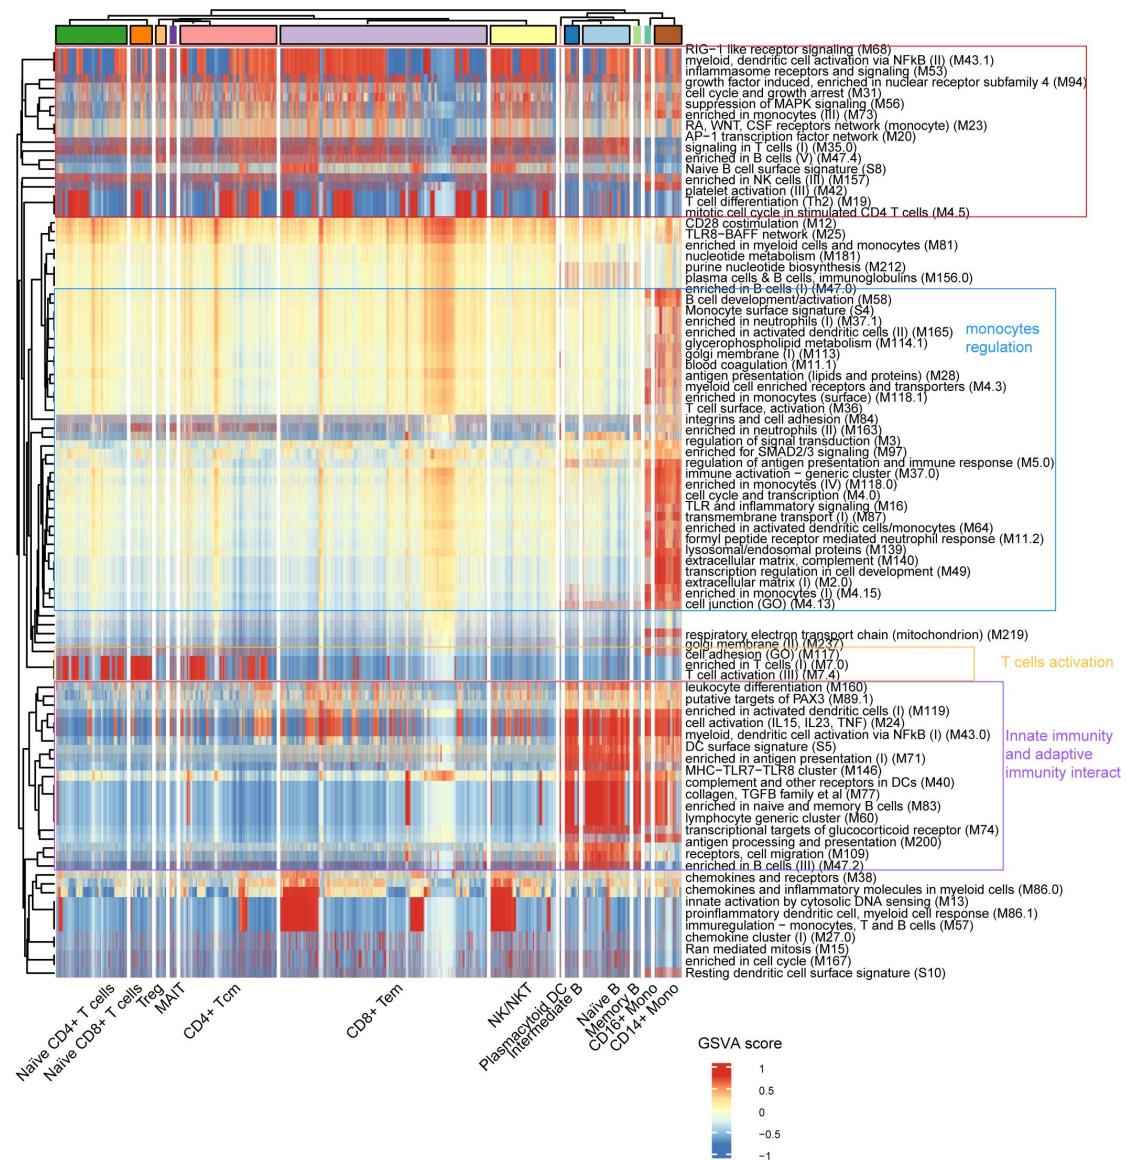

**Extended Data Fig. 6 | Significant gene functional enrichment shared by the time points considered in all cell types**

Heatmap showed differential pathways enriched in celltype according to GSVA score.

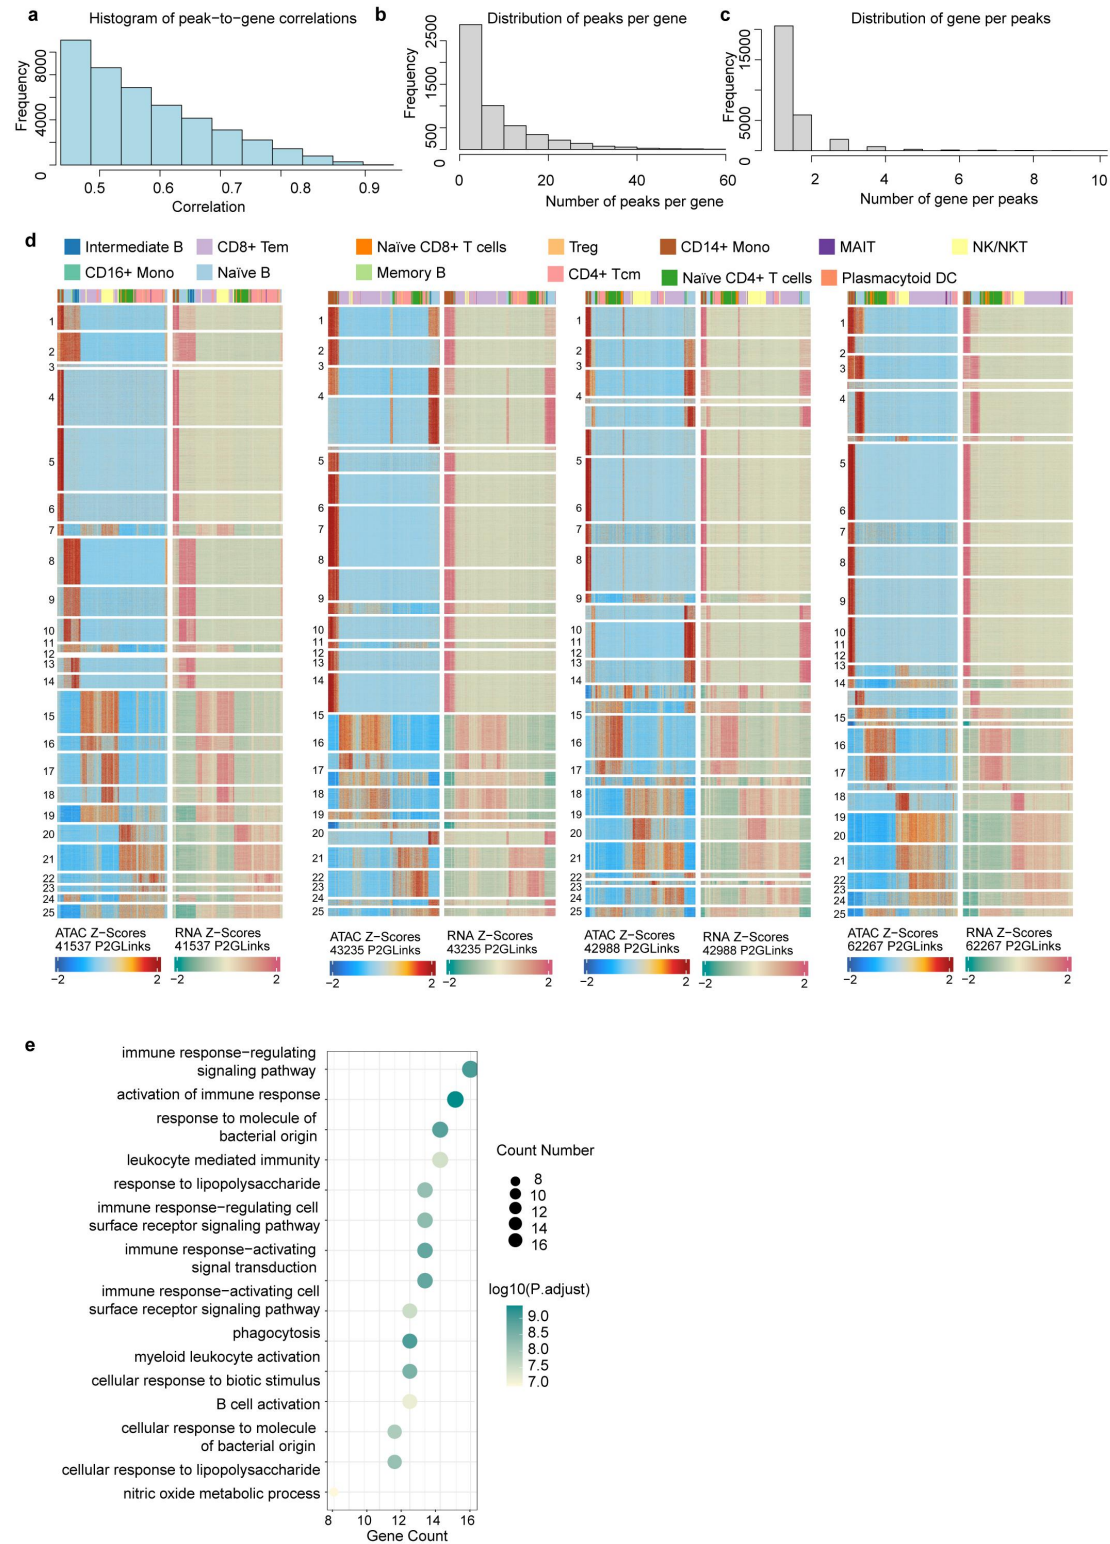

**Extended Data Fig. 7 | Peak-to-gene links identified in the each participants**

- Histogram showing frequency of peak-to-gene correlations. We retained only peak-to-gene pairs with correlations greater than 0.45
- Histogram showing the distribution of number of genes per distal peak.
- Histogram showing the distribution of number of distal peaks per gene.

- d.** Row-scaled heatmaps of statistically significant distal peak-to-gene links in P1-P4, respectively. Each row represents the expression of a gene (right) correlated to the accessibility of a distal peak (left). The heatmaps represent peak-to-gene analyses using only cells from the indicated participant.
- e.** GO enrichment analysis of the 42 genes obtained in figure 3c.





- d.** Visualization of eGRN formed by SPIB, RUNX1, IRF4 and FOSL2 TF target nodes are restricted to highly variable genes and regions.
- e.** Line graph showing the difference in transcription factor (TF) accessibility during vaccination. Each line represents a TF.



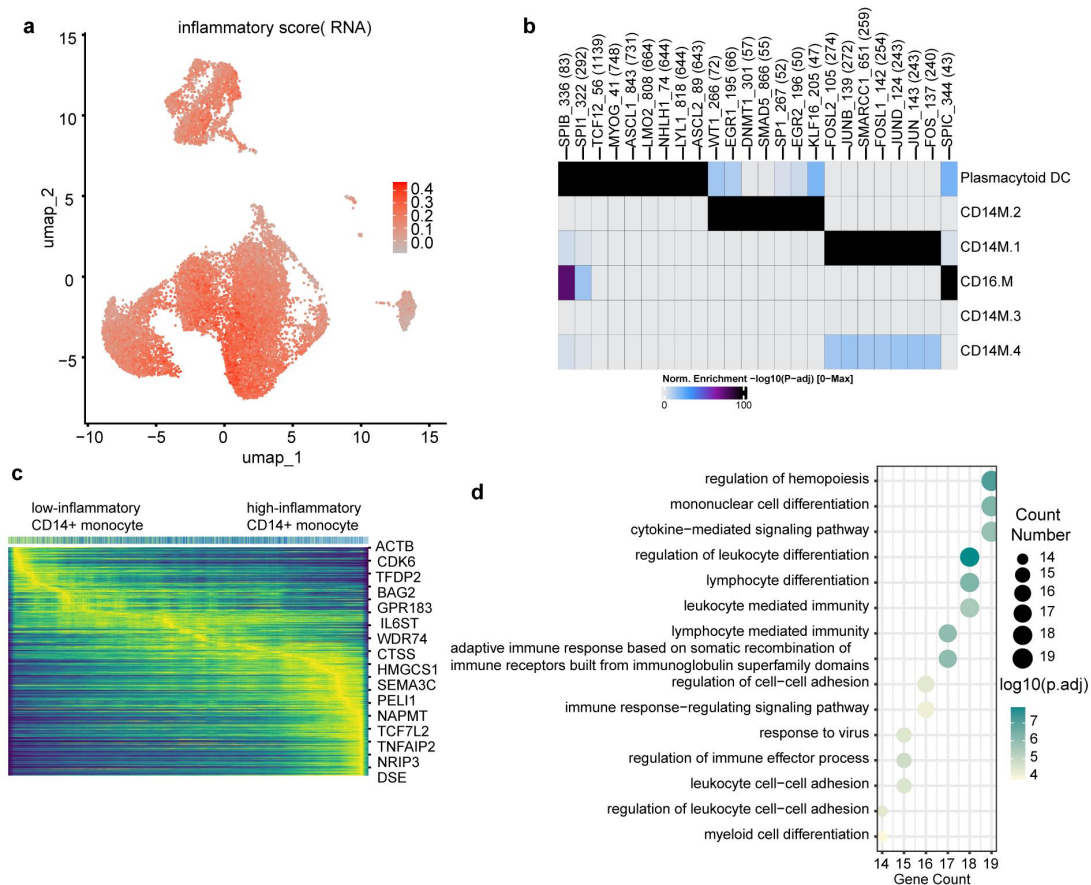

## Extended Data Fig. 9 | Gene transcription patterns of CD14<sup>+</sup> monocytes

- UMAP displaying inflammatory scores per cell.
- Heatmap of transcription factor motifs enriched in marker peak of six myeloid sub-celltypes. The color represents the normalized motif enrichment score calculated in ArchR using HOMER with the hypergeometric test.
- Heatmaps of gene expressions as a function of latent time. Color represents smoothed spliced counts.
- GO enrichment results based on genes whose transcription mode was chromatin closing begins after transcriptional repression.
