# Supplementary material for: Single-cell multiomics analysis reveals SARS-CoV-2 inactivated vaccine-induced trained immunity modulated by epigenetic remodeling
Source: Research Square preprint supplement (doi:10.21203/rs.3.rs-3706251/v1), 2024-01-09
Supplement: Supplementary file 1 [file 82ea289d53ecd291871e647e.xlsx]

## Sheet: filtered_Treg
	gene	clustering results	the numbers of genes	The cohesion of the last layer	The separation of the last layer
486	MDS2	1-21-0-0-0	51	0.123138	1.13328
1034	IPO13	1-21-0-0-0	51	0.123138	1.13328
2370	CD84	1-21-0-0-0	51	0.123138	1.13328
3768	STRN	1-21-0-0-0	51	0.123138	1.13328
5760	ITPR1	1-21-0-0-0	51	0.123138	1.13328
5856	ATG7	1-21-0-0-0	51	0.123138	1.13328
6596	SUCLG2	1-21-0-0-0	51	0.123138	1.13328
7006	EEFSEC	1-21-0-0-0	51	0.123138	1.13328
8040	UBE2K	1-21-0-0-0	51	0.123138	1.13328
8346	WDFY3	1-21-0-0-0	51	0.123138	1.13328
8422	RAP1GDS1	1-21-0-0-0	51	0.123138	1.13328
8494	PPA2	1-21-0-0-0	51	0.123138	1.13328
8552	ELOVL6	1-21-0-0-0	51	0.123138	1.13328
9852	FBN2	1-21-0-0-0	51	0.123138	1.13328
11338	USP49	1-21-0-0-0	51	0.123138	1.13328
11478	TRAM2	1-21-0-0-0	51	0.123138	1.13328
11608	IBTK	1-21-0-0-0	51	0.123138	1.13328
12844	TNS3	1-21-0-0-0	51	0.123138	1.13328
13580	AHCYL2	1-21-0-0-0	51	0.123138	1.13328
14212	HMBOX1	1-21-0-0-0	51	0.123138	1.13328
14888	MTBP	1-21-0-0-0	51	0.123138	1.13328
15634	GNAQ	1-21-0-0-0	51	0.123138	1.13328
16910	WDFY4	1-21-0-0-0	51	0.123138	1.13328
17234	NUTM2A-AS1	1-21-0-0-0	51	0.123138	1.13328
17332	ENTPD1	1-21-0-0-0	51	0.123138	1.13328
17468	ARMH3	1-21-0-0-0	51	0.123138	1.13328
17686	WDR11	1-21-0-0-0	51	0.123138	1.13328
18316	TTC17	1-21-0-0-0	51	0.123138	1.13328
18330	EXT2	1-21-0-0-0	51	0.123138	1.13328
18404	CELF1	1-21-0-0-0	51	0.123138	1.13328
19098	UVRAG	1-21-0-0-0	51	0.123138	1.13328
20280	CPNE8	1-21-0-0-0	51	0.123138	1.13328
21506	MPHOSPH9	1-21-0-0-0	51	0.123138	1.13328
22102	PCCA	1-21-0-0-0	51	0.123138	1.13328
22442	HECTD1	1-21-0-0-0	51	0.123138	1.13328
22924	NUMB	1-21-0-0-0	51	0.123138	1.13328
23166	DGLUCY	1-21-0-0-0	51	0.123138	1.13328
23692	ZNF106	1-21-0-0-0	51	0.123138	1.13328
24022	CSNK1G1	1-21-0-0-0	51	0.123138	1.13328
24438	DET1	1-21-0-0-0	51	0.123138	1.13328
26658	COX10	1-21-0-0-0	51	0.123138	1.13328
27112	ACACA	1-21-0-0-0	51	0.123138	1.13328
27414	KANSL1	1-21-0-0-0	51	0.123138	1.13328
28488	TTC39C	1-21-0-0-0	51	0.123138	1.13328
30118	ZNF573	1-21-0-0-0	51	0.123138	1.13328
30674	VRK3	1-21-0-0-0	51	0.123138	1.13328
32572	CABIN1	1-21-0-0-0	51	0.123138	1.13328
32672	MTMR3	1-21-0-0-0	51	0.123138	1.13328
33228	DHRSX	1-21-0-0-0	51	0.123138	1.13328
33798	DIAPH2	1-21-0-0-0	51	0.123138	1.13328
34242	PRKY	1-21-0-0-0	51	0.123138	1.13328
302	MFN2	1-175-0-0-0	34	0.132026	0.204235
1156	OSBPL9	1-175-0-0-0	34	0.132026	0.204235
1658	GNAI3	1-175-0-0-0	34	0.132026	0.204235
1876	HIST2H3PS2	1-175-0-0-0	34	0.132026	0.204235
3320	SDCCAG8	1-175-0-0-0	34	0.132026	0.204235
3784	PRKD3	1-175-0-0-0	34	0.132026	0.204235
5046	AGPS	1-175-0-0-0	34	0.132026	0.204235
6186	ANO10	1-175-0-0-0	34	0.132026	0.204235
6972	OSBPL11	1-175-0-0-0	34	0.132026	0.204235
7490	YEATS2	1-175-0-0-0	34	0.132026	0.204235
7546	AC068631.1	1-175-0-0-0	34	0.132026	0.204235
8286	BMP2K	1-175-0-0-0	34	0.132026	0.204235
8340	GPAT3	1-175-0-0-0	34	0.132026	0.204235
9240	NNT	1-175-0-0-0	34	0.132026	0.204235
11756	AFG1L	1-175-0-0-0	34	0.132026	0.204235
13488	TFEC	1-175-0-0-0	34	0.132026	0.204235
14560	STAU2	1-175-0-0-0	34	0.132026	0.204235
14568	ELOC	1-175-0-0-0	34	0.132026	0.204235
15584	PTAR1	1-175-0-0-0	34	0.132026	0.204235
15722	NFIL3	1-175-0-0-0	34	0.132026	0.204235
17634	ENO4	1-175-0-0-0	34	0.132026	0.204235
18242	ELP4	1-175-0-0-0	34	0.132026	0.204235
18254	QSER1	1-175-0-0-0	34	0.132026	0.204235
18268	FBXO3	1-175-0-0-0	34	0.132026	0.204235
18352	PHF21A	1-175-0-0-0	34	0.132026	0.204235
22438	STRN3	1-175-0-0-0	34	0.132026	0.204235
22468	SNX6	1-175-0-0-0	34	0.132026	0.204235
25610	AC012181.1	1-175-0-0-0	34	0.132026	0.204235
26814	SPECC1	1-175-0-0-0	34	0.132026	0.204235
27358	GPATCH8	1-175-0-0-0	34	0.132026	0.204235
28474	TMEM241	1-175-0-0-0	34	0.132026	0.204235
31216	C20orf194	1-175-0-0-0	34	0.132026	0.204235
32618	MIATNB	1-175-0-0-0	34	0.132026	0.204235
34112	MTMR1	1-175-0-0-0	34	0.132026	0.204235
944	ZMPSTE24	1-118-0-0-0	31	0.122885	0.202393
2956	RCOR3	1-118-0-0-0	31	0.122885	0.202393
2972	PPP2R5A	1-118-0-0-0	31	0.122885	0.202393
4148	ZNF638	1-118-0-0-0	31	0.122885	0.202393
4428	INPP4A	1-118-0-0-0	31	0.122885	0.202393
5232	C2orf69	1-118-0-0-0	31	0.122885	0.202393
5936	RFTN1	1-118-0-0-0	31	0.122885	0.202393
5996	TOP2B	1-118-0-0-0	31	0.122885	0.202393
7136	ARMC8	1-118-0-0-0	31	0.122885	0.202393
7202	SLC9A9	1-118-0-0-0	31	0.122885	0.202393
7430	TBL1XR1	1-118-0-0-0	31	0.122885	0.202393
8412	PDLIM5	1-118-0-0-0	31	0.122885	0.202393
8856	CBR4	1-118-0-0-0	31	0.122885	0.202393
9284	SLC38A9	1-118-0-0-0	31	0.122885	0.202393
9298	MAP3K1	1-118-0-0-0	31	0.122885	0.202393
10608	CDYL	1-118-0-0-0	31	0.122885	0.202393
11798	CDK19	1-118-0-0-0	31	0.122885	0.202393
13504	CTTNBP2	1-118-0-0-0	31	0.122885	0.202393
14924	RNF139	1-118-0-0-0	31	0.122885	0.202393
17574	MXI1	1-118-0-0-0	31	0.122885	0.202393
20084	PLBD1	1-118-0-0-0	31	0.122885	0.202393
21294	HECTD4	1-118-0-0-0	31	0.122885	0.202393
24154	PARP6	1-118-0-0-0	31	0.122885	0.202393
26972	CRLF3	1-118-0-0-0	31	0.122885	0.202393
27436	AC002558.3	1-118-0-0-0	31	0.122885	0.202393
28570	PIK3C3	1-118-0-0-0	31	0.122885	0.202393
28678	WDR7	1-118-0-0-0	31	0.122885	0.202393
31524	EDEM2	1-118-0-0-0	31	0.122885	0.202393
31662	SERINC3	1-118-0-0-0	31	0.122885	0.202393
33362	RPS6KA3	1-118-0-0-0	31	0.122885	0.202393
34110	MTM1	1-118-0-0-0	31	0.122885	0.202393
2586	RABGAP1L	1-58-0-0-0	30	0.132467	1.10277
3520	NBAS	1-58-0-0-0	30	0.132467	1.10277
6054	UBP1	1-58-0-0-0	30	0.132467	1.10277
6070	EPM2AIP1	1-58-0-0-0	30	0.132467	1.10277
6712	TBC1D23	1-58-0-0-0	30	0.132467	1.10277
6970	SNX4	1-58-0-0-0	30	0.132467	1.10277
7588	OPA1	1-58-0-0-0	30	0.132467	1.10277
7940	LCORL	1-58-0-0-0	30	0.132467	1.10277
9160	NIPBL	1-58-0-0-0	30	0.132467	1.10277
11872	MCM9	1-58-0-0-0	30	0.132467	1.10277
12286	RPS6KA2	1-58-0-0-0	30	0.132467	1.10277
12676	GARS-DT	1-58-0-0-0	30	0.132467	1.10277
17980	STIM1	1-58-0-0-0	30	0.132467	1.10277
18414	MTCH2	1-58-0-0-0	30	0.132467	1.10277
18458	ZFP91	1-58-0-0-0	30	0.132467	1.10277
19620	TMEM218	1-58-0-0-0	30	0.132467	1.10277
20322	ARID2	1-58-0-0-0	30	0.132467	1.10277
20756	MON2	1-58-0-0-0	30	0.132467	1.10277
21242	ATP2A2	1-58-0-0-0	30	0.132467	1.10277
21778	ALG5	1-58-0-0-0	30	0.132467	1.10277
21836	DNAJC15	1-58-0-0-0	30	0.132467	1.10277
21936	KPNA3	1-58-0-0-0	30	0.132467	1.10277
22534	MIS18BP1	1-58-0-0-0	30	0.132467	1.10277
22584	NIN	1-58-0-0-0	30	0.132467	1.10277
24562	MEF2A	1-58-0-0-0	30	0.132467	1.10277
28590	PSTPIP2	1-58-0-0-0	30	0.132467	1.10277
28630	DYM	1-58-0-0-0	30	0.132467	1.10277
28770	ZNF407	1-58-0-0-0	30	0.132467	1.10277
31498	ITCH	1-58-0-0-0	30	0.132467	1.10277
32212	AP001437.2	1-58-0-0-0	30	0.132467	1.10277
490	ELOA-AS1	1-101-0-0-0	30	0.074862	0.131941
1248	OMA1	1-101-0-0-0	30	0.074862	0.131941
1504	GLMN	1-101-0-0-0	30	0.074862	0.131941
3542	AC013400.1	1-101-0-0-0	30	0.074862	0.131941
5410	XRCC5	1-101-0-0-0	30	0.074862	0.131941
5954	SATB1	1-101-0-0-0	30	0.074862	0.131941
7308	TIPARP	1-101-0-0-0	30	0.074862	0.131941
9426	MRPS27	1-101-0-0-0	30	0.074862	0.131941
9528	THBS4	1-101-0-0-0	30	0.074862	0.131941
9864	LYRM7	1-101-0-0-0	30	0.074862	0.131941
11450	CDC5L	1-101-0-0-0	30	0.074862	0.131941
12516	CRPPA	1-101-0-0-0	30	0.074862	0.131941
14210	INTS9	1-101-0-0-0	30	0.074862	0.131941
14224	AC044849.1	1-101-0-0-0	30	0.074862	0.131941
15846	CORO2A	1-101-0-0-0	30	0.074862	0.131941
16430	PHPT1	1-101-0-0-0	30	0.074862	0.131941
17856	AC137894.3	1-101-0-0-0	30	0.074862	0.131941
19606	AP000866.2	1-101-0-0-0	30	0.074862	0.131941
20006	KLRC3	1-101-0-0-0	30	0.074862	0.131941
20260	BICD1	1-101-0-0-0	30	0.074862	0.131941
20806	HMGA2-AS1	1-101-0-0-0	30	0.074862	0.131941
20944	C12orf29	1-101-0-0-0	30	0.074862	0.131941
22660	AL158801.2	1-101-0-0-0	30	0.074862	0.131941
23020	BATF	1-101-0-0-0	30	0.074862	0.131941
28068	TMC8	1-101-0-0-0	30	0.074862	0.131941
29286	PPAN	1-101-0-0-0	30	0.074862	0.131941
29334	QTRT1	1-101-0-0-0	30	0.074862	0.131941
30554	TMEM143	1-101-0-0-0	30	0.074862	0.131941
31680	SYS1	1-101-0-0-0	30	0.074862	0.131941
31800	LINC01524	1-101-0-0-0	30	0.074862	0.131941
2878	DSTYK	1-31-0-0-0	24	0.221397	0.876651
3226	SIPA1L2	1-31-0-0-0	24	0.221397	0.876651
4758	AC114763.1	1-31-0-0-0	24	0.221397	0.876651
6250	CCDC12	1-31-0-0-0	24	0.221397	0.876651
7978	STIM2	1-31-0-0-0	24	0.221397	0.876651
11950	VNN2	1-31-0-0-0	24	0.221397	0.876651
14522	ARFGEF1	1-31-0-0-0	24	0.221397	0.876651
14914	FAM91A1	1-31-0-0-0	24	0.221397	0.876651
20922	PPP1R12A	1-31-0-0-0	24	0.221397	0.876651
21076	UHRF1BP1L	1-31-0-0-0	24	0.221397	0.876651
21330	MED13L	1-31-0-0-0	24	0.221397	0.876651
21438	RNF34	1-31-0-0-0	24	0.221397	0.876651
21958	WDFY2	1-31-0-0-0	24	0.221397	0.876651
22622	PSMC6	1-31-0-0-0	24	0.221397	0.876651
22886	MED6	1-31-0-0-0	24	0.221397	0.876651
22954	ZNF410	1-31-0-0-0	24	0.221397	0.876651
23018	JDP2	1-31-0-0-0	24	0.221397	0.876651
23326	WDR20	1-31-0-0-0	24	0.221397	0.876651
23810	CEP152	1-31-0-0-0	24	0.221397	0.876651
24004	USP3	1-31-0-0-0	24	0.221397	0.876651
29858	ZNF738	1-31-0-0-0	24	0.221397	0.876651
32062	AF165147.1	1-31-0-0-0	24	0.221397	0.876651
32460	TXNRD2	1-31-0-0-0	24	0.221397	0.876651
32648	EWSR1	1-31-0-0-0	24	0.221397	0.876651
920	PPIE	1-89-0-0-0	23	0.118306	0.208737
1860	LINC00623	1-89-0-0-0	23	0.118306	0.208737
2274	GLMP	1-89-0-0-0	23	0.118306	0.208737
4718	FAM168B	1-89-0-0-0	23	0.118306	0.208737
5254	NIF3L1	1-89-0-0-0	23	0.118306	0.208737
5648	ILKAP	1-89-0-0-0	23	0.118306	0.208737
5794	MTMR14	1-89-0-0-0	23	0.118306	0.208737
5918	EAF1	1-89-0-0-0	23	0.118306	0.208737
5982	UBE2E1	1-89-0-0-0	23	0.118306	0.208737
11160	B3GALT4	1-89-0-0-0	23	0.118306	0.208737
11630	SYNCRIP	1-89-0-0-0	23	0.118306	0.208737
13524	AC006333.2	1-89-0-0-0	23	0.118306	0.208737
21298	PTPN11	1-89-0-0-0	23	0.118306	0.208737
22272	TOX4	1-89-0-0-0	23	0.118306	0.208737
24174	ADPGK	1-89-0-0-0	23	0.118306	0.208737
24272	TSPAN3	1-89-0-0-0	23	0.118306	0.208737
24798	KCTD5	1-89-0-0-0	23	0.118306	0.208737
27610	SCPEP1	1-89-0-0-0	23	0.118306	0.208737
28794	ATP9B	1-89-0-0-0	23	0.118306	0.208737
29274	ZNF846	1-89-0-0-0	23	0.118306	0.208737
30508	CCDC9	1-89-0-0-0	23	0.118306	0.208737
33664	ZC4H2	1-89-0-0-0	23	0.118306	0.208737
34224	TMLHE-AS1	1-89-0-0-0	23	0.118306	0.208737
3178	AL121990.1	1-14-0-0-0	23	0.103408	0.166251
4092	AAK1	1-14-0-0-0	23	0.103408	0.166251
4172	ALMS1	1-14-0-0-0	23	0.103408	0.166251
4362	LINC00342	1-14-0-0-0	23	0.103408	0.166251
5676	ANKMY1	1-14-0-0-0	23	0.103408	0.166251
6270	SMARCC1	1-14-0-0-0	23	0.103408	0.166251
7680	DLG1	1-14-0-0-0	23	0.103408	0.166251
9544	MSH3	1-14-0-0-0	23	0.103408	0.166251
10802	U91328.2	1-14-0-0-0	23	0.103408	0.166251
11898	RNF217	1-14-0-0-0	23	0.103408	0.166251
12776	MRPL32	1-14-0-0-0	23	0.103408	0.166251
13268	TSC22D4	1-14-0-0-0	23	0.103408	0.166251
20100	WBP11	1-14-0-0-0	23	0.103408	0.166251
20136	GOLT1B	1-14-0-0-0	23	0.103408	0.166251
20720	PIP4K2C	1-14-0-0-0	23	0.103408	0.166251
21820	NAA16	1-14-0-0-0	23	0.103408	0.166251
22178	TUBGCP3	1-14-0-0-0	23	0.103408	0.166251
22510	MIA2	1-14-0-0-0	23	0.103408	0.166251
22810	FUT8	1-14-0-0-0	23	0.103408	0.166251
27794	POLG2	1-14-0-0-0	23	0.103408	0.166251
27818	HELZ	1-14-0-0-0	23	0.103408	0.166251
29206	EVI5L	1-14-0-0-0	23	0.103408	0.166251
32142	GART	1-14-0-0-0	23	0.103408	0.166251
560	PAQR7	1-10-1-0-0	22	0.124569	0.171313
1050	TMEM53	1-10-1-0-0	22	0.124569	0.171313
1480	GBP5	1-10-1-0-0	22	0.124569	0.171313
3910	FBXO11	1-10-1-0-0	22	0.124569	0.171313
6986	CHCHD6	1-10-1-0-0	22	0.124569	0.171313
8010	FAM114A1	1-10-1-0-0	22	0.124569	0.171313
8172	REST	1-10-1-0-0	22	0.124569	0.171313
9046	MTRR	1-10-1-0-0	22	0.124569	0.171313
11280	MTCH1	1-10-1-0-0	22	0.124569	0.171313
13498	ST7-OT4	1-10-1-0-0	22	0.124569	0.171313
13702	PARP12	1-10-1-0-0	22	0.124569	0.171313
15690	TUT7	1-10-1-0-0	22	0.124569	0.171313
16614	UPF2	1-10-1-0-0	22	0.124569	0.171313
17308	EXOC6	1-10-1-0-0	22	0.124569	0.171313
19384	DLAT	1-10-1-0-0	22	0.124569	0.171313
20582	NCKAP1L	1-10-1-0-0	22	0.124569	0.171313
21834	EPSTI1	1-10-1-0-0	22	0.124569	0.171313
21900	MED4	1-10-1-0-0	22	0.124569	0.171313
23212	BTBD7	1-10-1-0-0	22	0.124569	0.171313
23954	RNF111	1-10-1-0-0	22	0.124569	0.171313
29948	KCTD15	1-10-1-0-0	22	0.124569	0.171313
31644	L3MBTL1	1-10-1-0-0	22	0.124569	0.171313
1782	HIPK1-AS1	1-7-0-0-0	21	0.197374	1.04126
1914	LIX1L-AS1	1-7-0-0-0	21	0.197374	1.04126
2098	AL450992.3	1-7-0-0-0	21	0.197374	1.04126
3348	EFCAB2	1-7-0-0-0	21	0.197374	1.04126
4110	LINC01816	1-7-0-0-0	21	0.197374	1.04126
8442	LAMTOR3	1-7-0-0-0	21	0.197374	1.04126
9996	ETF1	1-7-0-0-0	21	0.197374	1.04126
11426	MRPS18A	1-7-0-0-0	21	0.197374	1.04126
12280	AL022069.3	1-7-0-0-0	21	0.197374	1.04126
13566	FLNC-AS1	1-7-0-0-0	21	0.197374	1.04126
18482	AP000640.2	1-7-0-0-0	21	0.197374	1.04126
20540	AC023509.3	1-7-0-0-0	21	0.197374	1.04126
20832	LINC02384	1-7-0-0-0	21	0.197374	1.04126
22168	AL442128.2	1-7-0-0-0	21	0.197374	1.04126
23008	AL691403.1	1-7-0-0-0	21	0.197374	1.04126
25316	AC009133.3	1-7-0-0-0	21	0.197374	1.04126
26788	AC007952.4	1-7-0-0-0	21	0.197374	1.04126
27658	TEX14	1-7-0-0-0	21	0.197374	1.04126
29736	IQCN	1-7-0-0-0	21	0.197374	1.04126
30412	ZNF296	1-7-0-0-0	21	0.197374	1.04126
33822	HNRNPH2	1-7-0-0-0	21	0.197374	1.04126
2562	AL645568.1	1-59-0-1-0	21	0.116329	0.133651
3120	LIN9	1-59-0-1-0	21	0.116329	0.133651
4252	SUCLG1	1-59-0-1-0	21	0.116329	0.133651
4764	AC092620.1	1-59-0-1-0	21	0.116329	0.133651
5042	AC019080.1	1-59-0-1-0	21	0.116329	0.133651
5152	PMS1	1-59-0-1-0	21	0.116329	0.133651
5228	FTCDNL1	1-59-0-1-0	21	0.116329	0.133651
6084	ITGA9-AS1	1-59-0-1-0	21	0.116329	0.133651
7186	ATR	1-59-0-1-0	21	0.116329	0.133651
8504	TBCK	1-59-0-1-0	21	0.116329	0.133651
8642	SCLT1	1-59-0-1-0	21	0.116329	0.133651
12726	AOAH	1-59-0-1-0	21	0.116329	0.133651
13674	AC024084.1	1-59-0-1-0	21	0.116329	0.133651
14978	CCDC26	1-59-0-1-0	21	0.116329	0.133651
17334	ENTPD1-AS1	1-59-0-1-0	21	0.116329	0.133651
19640	FOXRED1	1-59-0-1-0	21	0.116329	0.133651
23086	SPTLC2	1-59-0-1-0	21	0.116329	0.133651
24464	ZNF710	1-59-0-1-0	21	0.116329	0.133651
26586	PFAS	1-59-0-1-0	21	0.116329	0.133651
27016	RHOT1	1-59-0-1-0	21	0.116329	0.133651
31718	TP53RK	1-59-0-1-0	21	0.116329	0.133651
780	AZIN2	1-22-1-0-0	21	0.0712686	0.0799697
1884	SRGAP2B	1-22-1-0-0	21	0.0712686	0.0799697
6156	TRAK1	1-22-1-0-0	21	0.0712686	0.0799697
6700	CPOX	1-22-1-0-0	21	0.0712686	0.0799697
8136	AC110792.2	1-22-1-0-0	21	0.0712686	0.0799697
9620	POU5F2	1-22-1-0-0	21	0.0712686	0.0799697
11150	HSD17B8	1-22-1-0-0	21	0.0712686	0.0799697
15134	ZNF623	1-22-1-0-0	21	0.0712686	0.0799697
17002	SLC25A16	1-22-1-0-0	21	0.0712686	0.0799697
17032	H2AFY2	1-22-1-0-0	21	0.0712686	0.0799697
19762	NRIP2	1-22-1-0-0	21	0.0712686	0.0799697
22326	PABPN1	1-22-1-0-0	21	0.0712686	0.0799697
22328	NGDN	1-22-1-0-0	21	0.0712686	0.0799697
23034	TGFB3	1-22-1-0-0	21	0.0712686	0.0799697
24932	METTL22	1-22-1-0-0	21	0.0712686	0.0799697
27244	AC099811.4	1-22-1-0-0	21	0.0712686	0.0799697
29802	TSSK6	1-22-1-0-0	21	0.0712686	0.0799697
31996	U2AF1L5	1-22-1-0-0	21	0.0712686	0.0799697
32956	EP300-AS1	1-22-1-0-0	21	0.0712686	0.0799697
33456	LINC01186	1-22-1-0-0	21	0.0712686	0.0799697
33786	HDX	1-22-1-0-0	21	0.0712686	0.0799697
1578	RTCA	1-31-0-1-0	20	0.0944056	0.478602
1880	NBPF15	1-31-0-1-0	20	0.0944056	0.478602
2588	GPR52	1-31-0-1-0	20	0.0944056	0.478602
3894	TTC7A	1-31-0-1-0	20	0.0944056	0.478602
4744	UBXN4	1-31-0-1-0	20	0.0944056	0.478602
5710	AC005104.3	1-31-0-1-0	20	0.0944056	0.478602
5802	OGG1	1-31-0-1-0	20	0.0944056	0.478602
6030	GPD1L	1-31-0-1-0	20	0.0944056	0.478602
8220	AC053527.2	1-31-0-1-0	20	0.0944056	0.478602
11634	AL139274.2	1-31-0-1-0	20	0.0944056	0.478602
13896	ACTR3B	1-31-0-1-0	20	0.0944056	0.478602
19372	SIK2	1-31-0-1-0	20	0.0944056	0.478602
22480	PPP2R3C	1-31-0-1-0	20	0.0944056	0.478602
22652	SOCS4	1-31-0-1-0	20	0.0944056	0.478602
22968	ALDH6A1	1-31-0-1-0	20	0.0944056	0.478602
25112	IQCK	1-31-0-1-0	20	0.0944056	0.478602
25258	SULT1A1	1-31-0-1-0	20	0.0944056	0.478602
27696	RNFT1	1-31-0-1-0	20	0.0944056	0.478602
28732	VPS4B	1-31-0-1-0	20	0.0944056	0.478602
32048	MRPL39	1-31-0-1-0	20	0.0944056	0.478602
3076	FBXO28	1-93-0-1-0	19	0.109367	0.189597
3780	AC007390.2	1-93-0-1-0	19	0.109367	0.189597
4504	NCK2	1-93-0-1-0	19	0.109367	0.189597
5122	ZC3H15	1-93-0-1-0	19	0.109367	0.189597
8524	LEF1	1-93-0-1-0	19	0.109367	0.189597
8752	LRBA	1-93-0-1-0	19	0.109367	0.189597
9278	DHX29	1-93-0-1-0	19	0.109367	0.189597
18120	LINC02752	1-93-0-1-0	19	0.109367	0.189597
18730	VPS51	1-93-0-1-0	19	0.109367	0.189597
19446	PAFAH1B2	1-93-0-1-0	19	0.109367	0.189597
19452	PCSK7	1-93-0-1-0	19	0.109367	0.189597
19760	ITFG2	1-93-0-1-0	19	0.109367	0.189597
22330	ZFHX2-AS1	1-93-0-1-0	19	0.109367	0.189597
22360	AL136295.2	1-93-0-1-0	19	0.109367	0.189597
22638	CNIH1	1-93-0-1-0	19	0.109367	0.189597
23174	CCDC88C	1-93-0-1-0	19	0.109367	0.189597
26692	PIGL	1-93-0-1-0	19	0.109367	0.189597
27800	SMURF2	1-93-0-1-0	19	0.109367	0.189597
31848	STX16	1-93-0-1-0	19	0.109367	0.189597
1716	OVGP1	1-38-0-0-0	19	0.0380864	0.0745819
3478	GRHL1	1-38-0-0-0	19	0.0380864	0.0745819
5924	HACL1	1-38-0-0-0	19	0.0380864	0.0745819
7224	WWTR1	1-38-0-0-0	19	0.0380864	0.0745819
8606	CCNA2	1-38-0-0-0	19	0.0380864	0.0745819
9670	AC008906.2	1-38-0-0-0	19	0.0380864	0.0745819
13404	SYPL1	1-38-0-0-0	19	0.0380864	0.0745819
14546	TRPA1	1-38-0-0-0	19	0.0380864	0.0745819
14820	FZD6	1-38-0-0-0	19	0.0380864	0.0745819
19662	KCNJ1	1-38-0-0-0	19	0.0380864	0.0745819
22404	ADCY4	1-38-0-0-0	19	0.0380864	0.0745819
22408	CBLN3	1-38-0-0-0	19	0.0380864	0.0745819
24246	AC105020.6	1-38-0-0-0	19	0.0380864	0.0745819
25898	HYDIN	1-38-0-0-0	19	0.0380864	0.0745819
26898	AC010761.1	1-38-0-0-0	19	0.0380864	0.0745819
28132	AC124319.1	1-38-0-0-0	19	0.0380864	0.0745819
29382	ECSIT	1-38-0-0-0	19	0.0380864	0.0745819
30370	ZNF223	1-38-0-0-0	19	0.0380864	0.0745819
32716	RNF185	1-38-0-0-0	19	0.0380864	0.0745819
804	SFPQ	1-18-1-0-0	19	0.148488	0.186219
1134	SPATA6	1-18-1-0-0	19	0.148488	0.186219
2632	TOR1AIP2	1-18-1-0-0	19	0.148488	0.186219
2730	PLA2G4A	1-18-1-0-0	19	0.148488	0.186219
6060	PDCD6IP	1-18-1-0-0	19	0.148488	0.186219
9932	PPP2CA	1-18-1-0-0	19	0.148488	0.186219
10128	TCERG1	1-18-1-0-0	19	0.148488	0.186219
12542	HDAC9	1-18-1-0-0	19	0.148488	0.186219
17090	ECD	1-18-1-0-0	19	0.148488	0.186219
20118	STRAP	1-18-1-0-0	19	0.148488	0.186219
21480	RSRC2	1-18-1-0-0	19	0.148488	0.186219
21504	PITPNM2	1-18-1-0-0	19	0.148488	0.186219
22728	RTN1	1-18-1-0-0	19	0.148488	0.186219
23272	CCNK	1-18-1-0-0	19	0.148488	0.186219
26606	PIK3R5	1-18-1-0-0	19	0.148488	0.186219
27646	AC004687.1	1-18-1-0-0	19	0.148488	0.186219
27884	SLC39A11	1-18-1-0-0	19	0.148488	0.186219
29780	SUGP2	1-18-1-0-0	19	0.148488	0.186219
32442	HIRA	1-18-1-0-0	19	0.148488	0.186219
1708	CEPT1	1-22-0-0-0	18	0.139576	1.22128
3738	YIPF4	1-22-0-0-0	18	0.139576	1.22128
4080	ARHGAP25	1-22-0-0-0	18	0.139576	1.22128
4262	KCMF1	1-22-0-0-0	18	0.139576	1.22128
8560	ALPK1	1-22-0-0-0	18	0.139576	1.22128
11654	RNGTT	1-22-0-0-0	18	0.139576	1.22128
11716	ASCC3	1-22-0-0-0	18	0.139576	1.22128
12324	FAM120B	1-22-0-0-0	18	0.139576	1.22128
12782	COA1	1-22-0-0-0	18	0.139576	1.22128
13604	COPG2	1-22-0-0-0	18	0.139576	1.22128
14868	MED30	1-22-0-0-0	18	0.139576	1.22128
16738	PIP4K2A	1-22-0-0-0	18	0.139576	1.22128
16756	APBB1IP	1-22-0-0-0	18	0.139576	1.22128
17342	ZNF518A	1-22-0-0-0	18	0.139576	1.22128
19028	FCHSD2	1-22-0-0-0	18	0.139576	1.22128
21218	UBE3B	1-22-0-0-0	18	0.139576	1.22128
30120	SIPA1L3	1-22-0-0-0	18	0.139576	1.22128
31614	RALGAPB	1-22-0-0-0	18	0.139576	1.22128
1802	VANGL1	1-59-0-0-0	17	0.0673851	0.169823
2468	TMCO1-AS1	1-59-0-0-0	17	0.0673851	0.169823
3696	AC092164.1	1-59-0-0-0	17	0.0673851	0.169823
7292	PLCH1	1-59-0-0-0	17	0.0673851	0.169823
8776	TIGD4	1-59-0-0-0	17	0.0673851	0.169823
8974	C4orf47	1-59-0-0-0	17	0.0673851	0.169823
9836	LMNB1-DT	1-59-0-0-0	17	0.0673851	0.169823
13070	AC005076.1	1-59-0-0-0	17	0.0673851	0.169823
14796	UBR5-AS1	1-59-0-0-0	17	0.0673851	0.169823
17038	SAR1A	1-59-0-0-0	17	0.0673851	0.169823
17364	AL355490.2	1-59-0-0-0	17	0.0673851	0.169823
21524	TMED2-DT	1-59-0-0-0	17	0.0673851	0.169823
23252	AL163051.1	1-59-0-0-0	17	0.0673851	0.169823
28496	OSBPL1A	1-59-0-0-0	17	0.0673851	0.169823
29094	UHRF1	1-59-0-0-0	17	0.0673851	0.169823
32670	ASCC2	1-59-0-0-0	17	0.0673851	0.169823
32712	TUG1	1-59-0-0-0	17	0.0673851	0.169823
3594	DNAJC27	1-1-0-0-0	17	0.112956	0.156481
4728	MGAT5	1-1-0-0-0	17	0.112956	0.156481
5792	SETD5	1-1-0-0-0	17	0.112956	0.156481
6736	AC084198.2	1-1-0-0-0	17	0.112956	0.156481
8284	AC098818.2	1-1-0-0-0	17	0.112956	0.156481
9368	ERBIN	1-1-0-0-0	17	0.112956	0.156481
12412	FOXK1	1-1-0-0-0	17	0.112956	0.156481
13314	CUX1	1-1-0-0-0	17	0.112956	0.156481
17946	KCNQ1	1-1-0-0-0	17	0.112956	0.156481
18884	KDM2A	1-1-0-0-0	17	0.112956	0.156481
24962	CLEC16A	1-1-0-0-0	17	0.112956	0.156481
27944	SLC16A5	1-1-0-0-0	17	0.112956	0.156481
28294	USP14	1-1-0-0-0	17	0.112956	0.156481
29232	RAB11B-AS1	1-1-0-0-0	17	0.112956	0.156481
32810	MFNG	1-1-0-0-0	17	0.112956	0.156481
32940	MRTFA	1-1-0-0-0	17	0.112956	0.156481
33296	OFD1	1-1-0-0-0	17	0.112956	0.156481
1868	SRGAP2C	1-18-0-0-0	16	0.111317	0.155482
3142	ARF1	1-18-0-0-0	16	0.111317	0.155482
3994	AC016727.1	1-18-0-0-0	16	0.111317	0.155482
6482	ITIH4	1-18-0-0-0	16	0.111317	0.155482
8154	AC110611.2	1-18-0-0-0	16	0.111317	0.155482
15876	INVS	1-18-0-0-0	16	0.111317	0.155482
16674	PTER	1-18-0-0-0	16	0.111317	0.155482
20962	POC1B-AS1	1-18-0-0-0	16	0.111317	0.155482
21204	ALKBH2	1-18-0-0-0	16	0.111317	0.155482
21354	FBXO21	1-18-0-0-0	16	0.111317	0.155482
23824	DTWD1	1-18-0-0-0	16	0.111317	0.155482
26210	CHMP1A	1-18-0-0-0	16	0.111317	0.155482
27144	CWC25	1-18-0-0-0	16	0.111317	0.155482
27350	AC003102.1	1-18-0-0-0	16	0.111317	0.155482
29080	DPP9	1-18-0-0-0	16	0.111317	0.155482
29888	ZNF254	1-18-0-0-0	16	0.111317	0.155482
824	AGO4	1-12-2-0-0	16	0.109505	0.214956
2900	SRGAP2	1-12-2-0-0	16	0.109505	0.214956
3192	COG2	1-12-2-0-0	16	0.109505	0.214956
5028	MTX2	1-12-2-0-0	16	0.109505	0.214956
6234	FYCO1	1-12-2-0-0	16	0.109505	0.214956
8580	SEC24D	1-12-2-0-0	16	0.109505	0.214956
8996	EXOC3-AS1	1-12-2-0-0	16	0.109505	0.214956
10550	IRF4	1-12-2-0-0	16	0.109505	0.214956
15598	C9orf85	1-12-2-0-0	16	0.109505	0.214956
16854	BMS1	1-12-2-0-0	16	0.109505	0.214956
17312	FRA10AC1	1-12-2-0-0	16	0.109505	0.214956
19108	EMSY	1-12-2-0-0	16	0.109505	0.214956
22864	SLC39A9	1-12-2-0-0	16	0.109505	0.214956
23146	EFCAB11	1-12-2-0-0	16	0.109505	0.214956
31268	MCM8	1-12-2-0-0	16	0.109505	0.214956
33340	CDKL5	1-12-2-0-0	16	0.109505	0.214956
3222	DISC1	1-21-0-1-0	15	0.127597	0.149512
4940	CERS6	1-21-0-1-0	15	0.127597	0.149512
5588	DIS3L2	1-21-0-1-0	15	0.127597	0.149512
7530	SENP2	1-21-0-1-0	15	0.127597	0.149512
7804	HTT	1-21-0-1-0	15	0.127597	0.149512
11246	MAPK14	1-21-0-1-0	15	0.127597	0.149512
12274	PDE10A	1-21-0-1-0	15	0.127597	0.149512
14442	PLAG1	1-21-0-1-0	15	0.127597	0.149512
18238	DNAJC24	1-21-0-1-0	15	0.127597	0.149512
19982	CLEC12B	1-21-0-1-0	15	0.127597	0.149512
22302	AL132780.1	1-21-0-1-0	15	0.127597	0.149512
23700	HAUS2	1-21-0-1-0	15	0.127597	0.149512
26046	PLCG2	1-21-0-1-0	15	0.127597	0.149512
26726	PEMT	1-21-0-1-0	15	0.127597	0.149512
33126	Z97192.3	1-21-0-1-0	15	0.127597	0.149512
1948	ACP6	1-93-0-0-0	14	0.0746231	0.111428
2094	THEM4	1-93-0-0-0	14	0.0746231	0.111428
3238	COA6-AS1	1-93-0-0-0	14	0.0746231	0.111428
11500	KIAA1586	1-93-0-0-0	14	0.0746231	0.111428
15342	MLLT3	1-93-0-0-0	14	0.0746231	0.111428
16336	TSC1	1-93-0-0-0	14	0.0746231	0.111428
18008	CNGA4	1-93-0-0-0	14	0.0746231	0.111428
18820	SART1	1-93-0-0-0	14	0.0746231	0.111428
21070	IKBIP	1-93-0-0-0	14	0.0746231	0.111428
23360	AL133367.1	1-93-0-0-0	14	0.0746231	0.111428
27416	KANSL1-AS1	1-93-0-0-0	14	0.0746231	0.111428
27532	FLJ45513	1-93-0-0-0	14	0.0746231	0.111428
29556	TECR	1-93-0-0-0	14	0.0746231	0.111428
32386	PRMT2	1-93-0-0-0	14	0.0746231	0.111428
5662	AC145625.2	1-252-0-0-0	14	0.0260313	0.101631
7458	PEX5L	1-252-0-0-0	14	0.0260313	0.101631
8594	MAD2L1	1-252-0-0-0	14	0.0260313	0.101631
9226	AC114947.2	1-252-0-0-0	14	0.0260313	0.101631
17788	AL451069.1	1-252-0-0-0	14	0.0260313	0.101631
21276	ACAD10	1-252-0-0-0	14	0.0260313	0.101631
25612	CETP	1-252-0-0-0	14	0.0260313	0.101631
25770	C16orf86	1-252-0-0-0	14	0.0260313	0.101631
25786	NRN1L	1-252-0-0-0	14	0.0260313	0.101631
26068	AC040169.1	1-252-0-0-0	14	0.0260313	0.101631
26444	AC015727.1	1-252-0-0-0	14	0.0260313	0.101631
31066	ZNF256	1-252-0-0-0	14	0.0260313	0.101631
32656	NEFH	1-252-0-0-0	14	0.0260313	0.101631
32866	AL021707.2	1-252-0-0-0	14	0.0260313	0.101631
284	DRAXIN	1-191-0-0-0	14	0.0920067	0.141339
2054	MLLT11	1-191-0-0-0	14	0.0920067	0.141339
2582	LINC02776	1-191-0-0-0	14	0.0920067	0.141339
4208	WDR54	1-191-0-0-0	14	0.0920067	0.141339
6940	HSPBAP1	1-191-0-0-0	14	0.0920067	0.141339
7696	LMLN	1-191-0-0-0	14	0.0920067	0.141339
7710	PIGG	1-191-0-0-0	14	0.0920067	0.141339
9602	POLR3G	1-191-0-0-0	14	0.0920067	0.141339
13688	TTC26	1-191-0-0-0	14	0.0920067	0.141339
13946	WDR60	1-191-0-0-0	14	0.0920067	0.141339
14946	NSMCE2	1-191-0-0-0	14	0.0920067	0.141339
26354	TRPV1	1-191-0-0-0	14	0.0920067	0.141339
26760	MIEF2	1-191-0-0-0	14	0.0920067	0.141339
29114	CATSPERD	1-191-0-0-0	14	0.0920067	0.141339
566	PDIK1L	1-18-2-0-0	14	0.0622011	0.171381
764	RBBP4	1-18-2-0-0	14	0.0622011	0.171381
3580	PFN4	1-18-2-0-0	14	0.0622011	0.171381
10502	MRNIP	1-18-2-0-0	14	0.0622011	0.171381
12312	TCTE3	1-18-2-0-0	14	0.0622011	0.171381
14314	AC087623.2	1-18-2-0-0	14	0.0622011	0.171381
14412	AC064807.1	1-18-2-0-0	14	0.0622011	0.171381
14566	AC022868.2	1-18-2-0-0	14	0.0622011	0.171381
19136	AP002812.2	1-18-2-0-0	14	0.0622011	0.171381
20076	FAM234B	1-18-2-0-0	14	0.0622011	0.171381
24972	SOCS1	1-18-2-0-0	14	0.0622011	0.171381
25864	PDPR	1-18-2-0-0	14	0.0622011	0.171381
26558	NAA38	1-18-2-0-0	14	0.0622011	0.171381
32482	DGCR6L	1-18-2-0-0	14	0.0622011	0.171381
9054	CCT5	1-72-0-0-0	13	0.0585043	0.120768
10250	ITK	1-72-0-0-0	13	0.0585043	0.120768
12046	AL357146.1	1-72-0-0-0	13	0.0585043	0.120768
13220	ZSCAN21	1-72-0-0-0	13	0.0585043	0.120768
18336	TP53I11	1-72-0-0-0	13	0.0585043	0.120768
27806	AC037487.2	1-72-0-0-0	13	0.0585043	0.120768
27866	ABCA6	1-72-0-0-0	13	0.0585043	0.120768
27942	ATP5PD	1-72-0-0-0	13	0.0585043	0.120768
28062	TNRC6C	1-72-0-0-0	13	0.0585043	0.120768
29192	XAB2	1-72-0-0-0	13	0.0585043	0.120768
30622	FLT3LG	1-72-0-0-0	13	0.0585043	0.120768
32274	PDE9A	1-72-0-0-0	13	0.0585043	0.120768
33416	DYNLT3	1-72-0-0-0	13	0.0585043	0.120768
940	TMCO2	1-239-1-0-0	13	0.00563244	0
3858	PLEKHH2	1-239-1-0-0	13	0.00563244	0
4132	VAX2	1-239-1-0-0	13	0.00563244	0
6666	AC107204.1	1-239-1-0-0	13	0.00563244	0
8900	GPM6A	1-239-1-0-0	13	0.00563244	0
12106	SAMD5	1-239-1-0-0	13	0.00563244	0
14840	ABRA	1-239-1-0-0	13	0.00563244	0
15036	LINC01591	1-239-1-0-0	13	0.00563244	0
20110	RERG	1-239-1-0-0	13	0.00563244	0
22646	AL133444.1	1-239-1-0-0	13	0.00563244	0
24092	LINC01169	1-239-1-0-0	13	0.00563244	0
26338	AC006435.1	1-239-1-0-0	13	0.00563244	0
27410	AC126544.2	1-239-1-0-0	13	0.00563244	0
3886	CRIPT	1-1-0-0-1	13	0.0786683	0.140801
5906	MRPS25	1-1-0-0-1	13	0.0786683	0.140801
5922	COLQ	1-1-0-0-1	13	0.0786683	0.140801
13000	GTF2IRD2B	1-1-0-0-1	13	0.0786683	0.140801
14742	MTDH	1-1-0-0-1	13	0.0786683	0.140801
16120	PBX3	1-1-0-0-1	13	0.0786683	0.140801
18056	TMEM9B-AS1	1-1-0-0-1	13	0.0786683	0.140801
19046	MRPL48	1-1-0-0-1	13	0.0786683	0.140801
23914	PIGB	1-1-0-0-1	13	0.0786683	0.140801
24672	LMF1	1-1-0-0-1	13	0.0786683	0.140801
27510	AC004797.1	1-1-0-0-1	13	0.0786683	0.140801
30486	PRKD2	1-1-0-0-1	13	0.0786683	0.140801
32232	BRWD1	1-1-0-0-1	13	0.0786683	0.140801
2282	MEF2D	1-83-0-0-0	12	0.103778	0.233572
4016	WDPCP	1-83-0-0-0	12	0.103778	0.233572
7526	MAP3K13	1-83-0-0-0	12	0.103778	0.233572
12920	TPST1	1-83-0-0-0	12	0.103778	0.233572
14016	XKR6	1-83-0-0-0	12	0.103778	0.233572
15830	NCBP1	1-83-0-0-0	12	0.103778	0.233572
20658	CS	1-83-0-0-0	12	0.103778	0.233572
22554	NEMF	1-83-0-0-0	12	0.103778	0.233572
27716	BCAS3	1-83-0-0-0	12	0.103778	0.233572
31336	SEC23B	1-83-0-0-0	12	0.103778	0.233572
31468	CBFA2T2	1-83-0-0-0	12	0.103778	0.233572
32834	AL022311.1	1-83-0-0-0	12	0.103778	0.233572
230	CTNNBIP1	1-23-2-0-0	12	0.0817904	0.137909
316	KAZN	1-23-2-0-0	12	0.0817904	0.137909
2412	TOMM40L	1-23-2-0-0	12	0.0817904	0.137909
10666	PAK1IP1	1-23-2-0-0	12	0.0817904	0.137909
12664	AC007285.2	1-23-2-0-0	12	0.0817904	0.137909
13824	LINC00996	1-23-2-0-0	12	0.0817904	0.137909
16034	FBXW2	1-23-2-0-0	12	0.0817904	0.137909
19510	AP003392.1	1-23-2-0-0	12	0.0817904	0.137909
20122	MGST1	1-23-2-0-0	12	0.0817904	0.137909
20606	SARNP	1-23-2-0-0	12	0.0817904	0.137909
29230	ANGPTL4	1-23-2-0-0	12	0.0817904	0.137909
32104	MIS18A-AS1	1-23-2-0-0	12	0.0817904	0.137909
7004	RUVBL1-AS1	1-128-0-0-0	12	0.0320874	0.0340271
9976	AC106791.1	1-128-0-0-0	12	0.0320874	0.0340271
12702	DPY19L1	1-128-0-0-0	12	0.0320874	0.0340271
16256	PTPA	1-128-0-0-0	12	0.0320874	0.0340271
16986	AC013287.1	1-128-0-0-0	12	0.0320874	0.0340271
23290	SLC25A47	1-128-0-0-0	12	0.0320874	0.0340271
26468	C17orf100	1-128-0-0-0	12	0.0320874	0.0340271
27834	AC005332.6	1-128-0-0-0	12	0.0320874	0.0340271
30038	WDR62	1-128-0-0-0	12	0.0320874	0.0340271
31964	AL118506.1	1-128-0-0-0	12	0.0320874	0.0340271
32252	LINC00111	1-128-0-0-0	12	0.0320874	0.0340271
33754	ZDHHC15	1-128-0-0-0	12	0.0320874	0.0340271
954	AL603839.3	1-127-0-0-0	12	0.0346974	0.0855289
6820	SIDT1	1-127-0-0-0	12	0.0346974	0.0855289
8212	SLC4A4	1-127-0-0-0	12	0.0346974	0.0855289
14100	FAM160B2	1-127-0-0-0	12	0.0346974	0.0855289
14982	AC022973.5	1-127-0-0-0	12	0.0346974	0.0855289
15004	AF228727.1	1-127-0-0-0	12	0.0346974	0.0855289
16824	IATPR	1-127-0-0-0	12	0.0346974	0.0855289
23512	AC123768.4	1-127-0-0-0	12	0.0346974	0.0855289
24362	AC245033.2	1-127-0-0-0	12	0.0346974	0.0855289
24434	MRPL46	1-127-0-0-0	12	0.0346974	0.0855289
24540	AC012409.2	1-127-0-0-0	12	0.0346974	0.0855289
28280	ZNF750	1-127-0-0-0	12	0.0346974	0.0855289
26	AL645608.1	1-10-4-0-0	12	0.0548862	0.0822932
3130	PSEN2	1-10-4-0-0	12	0.0548862	0.0822932
3652	EIF2B4	1-10-4-0-0	12	0.0548862	0.0822932
10058	CD14	1-10-4-0-0	12	0.0548862	0.0822932
11524	EYS	1-10-4-0-0	12	0.0548862	0.0822932
18834	RAB1B	1-10-4-0-0	12	0.0548862	0.0822932
19102	THAP12	1-10-4-0-0	12	0.0548862	0.0822932
21860	GPALPP1	1-10-4-0-0	12	0.0548862	0.0822932
22040	RBM26-AS1	1-10-4-0-0	12	0.0548862	0.0822932
22324	BCL2L2-PABPN1	1-10-4-0-0	12	0.0548862	0.0822932
25890	IL34	1-10-4-0-0	12	0.0548862	0.0822932
32508	HIC2	1-10-4-0-0	12	0.0548862	0.0822932
310	VPS13D	1-1-1-1-0	12	0.110711	0
1200	MAGOH	1-1-1-1-0	12	0.110711	0
2226	ASH1L	1-1-1-1-0	12	0.110711	0
9280	MTREX	1-1-1-1-0	12	0.110711	0
11720	HACE1	1-1-1-1-0	12	0.110711	0
12634	JAZF1	1-1-1-1-0	12	0.110711	0
16116	MAPKAP1	1-1-1-1-0	12	0.110711	0
16486	NOXA1	1-1-1-1-0	12	0.110711	0
19044	RAB6A	1-1-1-1-0	12	0.110711	0
19130	RSF1	1-1-1-1-0	12	0.110711	0
19664	ARHGAP32	1-1-1-1-0	12	0.110711	0
25562	CHD9	1-1-1-1-0	12	0.110711	0
13334	POLR2J	1-97-1-0-0	11	0.0994242	0.142897
18400	PSMC3	1-97-1-0-0	11	0.0994242	0.142897
21144	CKAP4	1-97-1-0-0	11	0.0994242	0.142897
21246	ARPC3	1-97-1-0-0	11	0.0994242	0.142897
21730	HMGB1	1-97-1-0-0	11	0.0994242	0.142897
23456	SNRPN	1-97-1-0-0	11	0.0994242	0.142897
24020	PPIB	1-97-1-0-0	11	0.0994242	0.142897
25780	THAP11	1-97-1-0-0	11	0.0994242	0.142897
28964	LSM7	1-97-1-0-0	11	0.0994242	0.142897
31864	ATP5F1E	1-97-1-0-0	11	0.0994242	0.142897
33776	ITM2A	1-97-1-0-0	11	0.0994242	0.142897
9230	TMEM267	1-89-1-0-0	11	0.120474	0.22446
9946	SAR1B	1-89-1-0-0	11	0.120474	0.22446
10182	NDST1	1-89-1-0-0	11	0.120474	0.22446
11668	RRAGD	1-89-1-0-0	11	0.120474	0.22446
12400	TTYH3	1-89-1-0-0	11	0.120474	0.22446
14798	UBR5	1-89-1-0-0	11	0.120474	0.22446
19626	STT3A	1-89-1-0-0	11	0.120474	0.22446
20718	DCTN2	1-89-1-0-0	11	0.120474	0.22446
21162	MTERF2	1-89-1-0-0	11	0.120474	0.22446
27614	AKAP1	1-89-1-0-0	11	0.120474	0.22446
32916	MIEF1	1-89-1-0-0	11	0.120474	0.22446
520	SRRM1	1-83-1-0-0	11	0.101949	0.141328
4830	RIF1	1-83-1-0-0	11	0.101949	0.141328
5988	NR1D2	1-83-1-0-0	11	0.101949	0.141328
10866	AL513548.1	1-83-1-0-0	11	0.101949	0.141328
12660	FKBP14	1-83-1-0-0	11	0.101949	0.141328
12692	KBTBD2	1-83-1-0-0	11	0.101949	0.141328
17074	DNAJB12	1-83-1-0-0	11	0.101949	0.141328
19888	RBP5	1-83-1-0-0	11	0.101949	0.141328
21138	APPL2	1-83-1-0-0	11	0.101949	0.141328
25476	ARMC5	1-83-1-0-0	11	0.101949	0.141328
31994	SIK1B	1-83-1-0-0	11	0.101949	0.141328
2394	PFDN2	1-54-0-0-0	11	0.0686336	0.151656
3154	OBSCN	1-54-0-0-0	11	0.0686336	0.151656
5176	AC067945.3	1-54-0-0-0	11	0.0686336	0.151656
6648	EBLN2	1-54-0-0-0	11	0.0686336	0.151656
6658	ROBO2	1-54-0-0-0	11	0.0686336	0.151656
11536	SDHAF4	1-54-0-0-0	11	0.0686336	0.151656
16122	MVB12B	1-54-0-0-0	11	0.0686336	0.151656
17674	BAG3	1-54-0-0-0	11	0.0686336	0.151656
23668	MAPKBP1	1-54-0-0-0	11	0.0686336	0.151656
30998	ZNF470	1-54-0-0-0	11	0.0686336	0.151656
31516	ACSS2	1-54-0-0-0	11	0.0686336	0.151656
268	AL109811.1	1-22-1-1-0	11	0.102728	0.122809
652	EYA3	1-22-1-1-0	11	0.102728	0.122809
11646	SLC35A1	1-22-1-1-0	11	0.102728	0.122809
15370	MOB3B	1-22-1-1-0	11	0.102728	0.122809
21748	N4BP2L1	1-22-1-1-0	11	0.102728	0.122809
22686	EXOC5	1-22-1-1-0	11	0.102728	0.122809
23928	ZNF280D	1-22-1-1-0	11	0.102728	0.122809
27106	AATF	1-22-1-1-0	11	0.102728	0.122809
28658	MBD2	1-22-1-1-0	11	0.102728	0.122809
33638	SPIN3	1-22-1-1-0	11	0.102728	0.122809
33764	ATP7A	1-22-1-1-0	11	0.102728	0.122809
3358	CNST	1-22-0-1-0	11	0.0992426	0.123314
6458	DNAH1	1-22-0-1-0	11	0.0992426	0.123314
12720	KIAA0895	1-22-0-1-0	11	0.0992426	0.123314
19660	SENCR	1-22-0-1-0	11	0.0992426	0.123314
21380	GCN1	1-22-0-1-0	11	0.0992426	0.123314
23368	KLC1	1-22-0-1-0	11	0.0992426	0.123314
23666	MGA	1-22-0-1-0	11	0.0992426	0.123314
24278	HMG20A	1-22-0-1-0	11	0.0992426	0.123314
26916	AC024267.4	1-22-0-1-0	11	0.0992426	0.123314
26954	NSRP1	1-22-0-1-0	11	0.0992426	0.123314
27664	AC099850.1	1-22-0-1-0	11	0.0992426	0.123314
926	LINC02811	1-189-0-0-0	11	0.0674136	0.130783
1744	ST7L	1-189-0-0-0	11	0.0674136	0.130783
4486	SLC9A2	1-189-0-0-0	11	0.0674136	0.130783
5550	FBXO36	1-189-0-0-0	11	0.0674136	0.130783
7298	AC104472.4	1-189-0-0-0	11	0.0674136	0.130783
7922	TAPT1-AS1	1-189-0-0-0	11	0.0674136	0.130783
9772	CCDC112	1-189-0-0-0	11	0.0674136	0.130783
22216	CFAP97D2	1-189-0-0-0	11	0.0674136	0.130783
24844	LINC00921	1-189-0-0-0	11	0.0674136	0.130783
25368	CD2BP2-DT	1-189-0-0-0	11	0.0674136	0.130783
26018	AC092332.1	1-189-0-0-0	11	0.0674136	0.130783
1792	NRAS	1-14-4-0-0	11	0.104538	0.204702
1934	NBPF12	1-14-4-0-0	11	0.104538	0.204702
15888	RNF20	1-14-4-0-0	11	0.104538	0.204702
17648	FAM204A	1-14-4-0-0	11	0.104538	0.204702
19730	WNK1	1-14-4-0-0	11	0.104538	0.204702
22462	EGLN3	1-14-4-0-0	11	0.104538	0.204702
22720	GPR135	1-14-4-0-0	11	0.104538	0.204702
23186	ATXN3	1-14-4-0-0	11	0.104538	0.204702
23816	COPS2	1-14-4-0-0	11	0.104538	0.204702
26504	ELP5	1-14-4-0-0	11	0.104538	0.204702
26688	NCOR1	1-14-4-0-0	11	0.104538	0.204702
1950	GPR89B	1-139-0-1-0	11	0.137413	0.132595
4402	ANKRD39	1-139-0-1-0	11	0.137413	0.132595
5288	NOP58	1-139-0-1-0	11	0.137413	0.132595
5580	NMUR1	1-139-0-1-0	11	0.137413	0.132595
8152	AC110611.1	1-139-0-1-0	11	0.137413	0.132595
9032	MED10	1-139-0-1-0	11	0.137413	0.132595
14774	RNF19A	1-139-0-1-0	11	0.137413	0.132595
19900	SLC2A3	1-139-0-1-0	11	0.137413	0.132595
20842	MDM2	1-139-0-1-0	11	0.137413	0.132595
31888	LSM14B	1-139-0-1-0	11	0.137413	0.132595
32754	FBXO7	1-139-0-1-0	11	0.137413	0.132595
662	SESN2	1-139-0-0-0	11	0.0978569	0.145117
8070	ATP8A1	1-139-0-0-0	11	0.0978569	0.145117
10508	AC010285.3	1-139-0-0-0	11	0.0978569	0.145117
10596	PRPF4B	1-139-0-0-0	11	0.0978569	0.145117
12944	AC006480.2	1-139-0-0-0	11	0.0978569	0.145117
17260	STAMBPL1	1-139-0-0-0	11	0.0978569	0.145117
18142	COPB1	1-139-0-0-0	11	0.0978569	0.145117
21520	SNRNP35	1-139-0-0-0	11	0.0978569	0.145117
24568	ADAMTS17	1-139-0-0-0	11	0.0978569	0.145117
26006	AC027279.1	1-139-0-0-0	11	0.0978569	0.145117
27478	SKAP1	1-139-0-0-0	11	0.0978569	0.145117
748	LCK	1-113-0-0-0	11	0.0877403	0.181192
7780	ZFYVE28	1-113-0-0-0	11	0.0877403	0.181192
9248	EMB	1-113-0-0-0	11	0.0877403	0.181192
12558	SP4	1-113-0-0-0	11	0.0877403	0.181192
18812	FOSL1	1-113-0-0-0	11	0.0877403	0.181192
19234	TAF1D	1-113-0-0-0	11	0.0877403	0.181192
19646	DCPS	1-113-0-0-0	11	0.0877403	0.181192
23266	BCL11B	1-113-0-0-0	11	0.0877403	0.181192
26880	AC005726.5	1-113-0-0-0	11	0.0877403	0.181192
29852	ZNF714	1-113-0-0-0	11	0.0877403	0.181192
30668	NUP62	1-113-0-0-0	11	0.0877403	0.181192
1298	JAK1	1-10-2-0-0	11	0.132283	0.243541
3316	CEP170	1-10-2-0-0	11	0.132283	0.243541
7974	RBPJ	1-10-2-0-0	11	0.132283	0.243541
19198	EED	1-10-2-0-0	11	0.132283	0.243541
22672	PELI2	1-10-2-0-0	11	0.132283	0.243541
23678	EHD4	1-10-2-0-0	11	0.132283	0.243541
27002	RAB11FIP4	1-10-2-0-0	11	0.132283	0.243541
27684	CLTC	1-10-2-0-0	11	0.132283	0.243541
28454	ESCO1	1-10-2-0-0	11	0.132283	0.243541
31592	SRC	1-10-2-0-0	11	0.132283	0.243541
32308	TRAPPC10	1-10-2-0-0	11	0.132283	0.243541
1076	MUTYH	1-10-0-1-0	11	0.100988	0.168913
3836	EML4	1-10-0-1-0	11	0.100988	0.168913
4714	PTPN18	1-10-0-1-0	11	0.100988	0.168913
8604	EXOSC9	1-10-0-1-0	11	0.100988	0.168913
11522	PHF3	1-10-0-1-0	11	0.100988	0.168913
15256	RFX3-AS1	1-10-0-1-0	11	0.100988	0.168913
25000	SNX29	1-10-0-1-0	11	0.100988	0.168913
25822	PRMT7	1-10-0-1-0	11	0.100988	0.168913
28912	MBD3	1-10-0-1-0	11	0.100988	0.168913
31042	ZNF211	1-10-0-1-0	11	0.100988	0.168913
32140	TMEM50B	1-10-0-1-0	11	0.100988	0.168913
240	UBE4B	1-54-1-0-0	10	0.0921355	0.256121
1288	EFCAB7	1-54-1-0-0	10	0.0921355	0.256121
8006	TLR1	1-54-1-0-0	10	0.0921355	0.256121
8700	INPP4B	1-54-1-0-0	10	0.0921355	0.256121
9328	ERCC8	1-54-1-0-0	10	0.0921355	0.256121
13024	ZP3	1-54-1-0-0	10	0.0921355	0.256121
19374	PPP2R1B	1-54-1-0-0	10	0.0921355	0.256121
22006	AL353660.1	1-54-1-0-0	10	0.0921355	0.256121
22972	ABCD4	1-54-1-0-0	10	0.0921355	0.256121
24716	NME3	1-54-1-0-0	10	0.0921355	0.256121
9562	RPS23	1-51-0-0-0	10	0.114928	0.210958
11204	RPS10	1-51-0-0-0	10	0.114928	0.210958
14746	RPL30	1-51-0-0-0	10	0.114928	0.210958
18736	FAU	1-51-0-0-0	10	0.114928	0.210958
26596	RPL26	1-51-0-0-0	10	0.114928	0.210958
27156	RPL19	1-51-0-0-0	10	0.114928	0.210958
28902	RPS15	1-51-0-0-0	10	0.114928	0.210958
29106	RPL36	1-51-0-0-0	10	0.114928	0.210958
33818	RPL36A	1-51-0-0-0	10	0.114928	0.210958
33950	RPL39	1-51-0-0-0	10	0.114928	0.210958
654	PTAFR	1-38-1-0-0	10	0.122191	0.311958
4738	RAB3GAP1	1-38-1-0-0	10	0.122191	0.311958
4844	FMNL2	1-38-1-0-0	10	0.122191	0.311958
8014	KLHL5	1-38-1-0-0	10	0.122191	0.311958
8086	AC107068.2	1-38-1-0-0	10	0.122191	0.311958
8846	KLHL2	1-38-1-0-0	10	0.122191	0.311958
9818	SNX2	1-38-1-0-0	10	0.122191	0.311958
11502	ZNF451	1-38-1-0-0	10	0.122191	0.311958
13494	CAPZA2	1-38-1-0-0	10	0.122191	0.311958
27494	CALCOCO2	1-38-1-0-0	10	0.122191	0.311958
15076	PTP4A3	1-258-1-0-0	10	0.0830251	0.178825
15138	AC105219.1	1-258-1-0-0	10	0.0830251	0.178825
19014	ARAP1	1-258-1-0-0	10	0.0830251	0.178825
19494	PHLDB1	1-258-1-0-0	10	0.0830251	0.178825
22288	SLC7A7	1-258-1-0-0	10	0.0830251	0.178825
26592	KRBA2	1-258-1-0-0	10	0.0830251	0.178825
26798	MAPK7	1-258-1-0-0	10	0.0830251	0.178825
30770	ZNF766	1-258-1-0-0	10	0.0830251	0.178825
31030	ZNF749	1-258-1-0-0	10	0.0830251	0.178825
31660	TTPAL	1-258-1-0-0	10	0.0830251	0.178825
1408	SAMD13	1-204-2-0-0	10	0.00447662	0
3392	AL672291.1	1-204-2-0-0	10	0.00447662	0
6316	AC137630.1	1-204-2-0-0	10	0.00447662	0
11322	TREML1	1-204-2-0-0	10	0.00447662	0
12424	AC092171.3	1-204-2-0-0	10	0.00447662	0
26770	LGALS9C	1-204-2-0-0	10	0.00447662	0
27638	LPO	1-204-2-0-0	10	0.00447662	0
30556	SYNGR4	1-204-2-0-0	10	0.00447662	0
30764	AC010320.1	1-204-2-0-0	10	0.00447662	0
31984	AL121581.2	1-204-2-0-0	10	0.00447662	0
10890	HIST1H3J	1-189-1-0-0	10	0.0654537	0.11024
22294	REM2	1-189-1-0-0	10	0.0654537	0.11024
24592	AC023024.1	1-189-1-0-0	10	0.0654537	0.11024
24928	EEF2KMT	1-189-1-0-0	10	0.0654537	0.11024
25500	NETO2	1-189-1-0-0	10	0.0654537	0.11024
29112	LONP1	1-189-1-0-0	10	0.0654537	0.11024
30298	GRIK5	1-189-1-0-0	10	0.0654537	0.11024
32874	AL021707.5	1-189-1-0-0	10	0.0654537	0.11024
33230	DHRSX-IT1	1-189-1-0-0	10	0.0654537	0.11024
33978	GRIA3	1-189-1-0-0	10	0.0654537	0.11024
500	HMGCL	1-132-1-0-0	10	0.0327767	0.0873546
1712	DENND2D	1-132-1-0-0	10	0.0327767	0.0873546
9626	AC114980.1	1-132-1-0-0	10	0.0327767	0.0873546
15402	BAG1	1-132-1-0-0	10	0.0327767	0.0873546
15482	CCDC107	1-132-1-0-0	10	0.0327767	0.0873546
18744	CAPN1	1-132-1-0-0	10	0.0327767	0.0873546
19534	NLRX1	1-132-1-0-0	10	0.0327767	0.0873546
25308	NPIPB12	1-132-1-0-0	10	0.0327767	0.0873546
30304	AC010247.1	1-132-1-0-0	10	0.0327767	0.0873546
33536	TIMM17B	1-132-1-0-0	10	0.0327767	0.0873546
1508	GFI1	1-132-0-0-0	10	0.0761668	0.804624
2244	KHDC4	1-132-0-0-0	10	0.0761668	0.804624
4506	AC010978.1	1-132-0-0-0	10	0.0761668	0.804624
7066	ASTE1	1-132-0-0-0	10	0.0761668	0.804624
9446	ARHGEF28	1-132-0-0-0	10	0.0761668	0.804624
22420	GZMB	1-132-0-0-0	10	0.0761668	0.804624
28066	TMC6	1-132-0-0-0	10	0.0761668	0.804624
30474	PPP5C	1-132-0-0-0	10	0.0761668	0.804624
32794	NCF4	1-132-0-0-0	10	0.0761668	0.804624
34130	CCNQ	1-132-0-0-0	10	0.0761668	0.804624
7529	TMEM41A_flip	1-107-0-0-0	10	0.0664403	0.207893
15013	TG_flip	1-107-0-0-0	10	0.0664403	0.207893
17323	HELLS_flip	1-107-0-0-0	10	0.0664403	0.207893
19509	CCDC84_flip	1-107-0-0-0	10	0.0664403	0.207893
20135	RECQL_flip	1-107-0-0-0	10	0.0664403	0.207893
30551	CCDC114_flip	1-107-0-0-0	10	0.0664403	0.207893
31883	MIR646HG_flip	1-107-0-0-0	10	0.0664403	0.207893
32363	COL6A2_flip	1-107-0-0-0	10	0.0664403	0.207893
32843	PICK1_flip	1-107-0-0-0	10	0.0664403	0.207893
33485	USP11_flip	1-107-0-0-0	10	0.0664403	0.207893
3002	ANGEL2	1-10-5-0-0	10	0.098637	0.142094
3060	AL392172.1	1-10-5-0-0	10	0.098637	0.142094
5016	WIPF1	1-10-5-0-0	10	0.098637	0.142094
6908	IQCB1	1-10-5-0-0	10	0.098637	0.142094
8616	SPATA5	1-10-5-0-0	10	0.098637	0.142094
13868	SMARCD3	1-10-5-0-0	10	0.098637	0.142094
15432	NUDT2	1-10-5-0-0	10	0.098637	0.142094
15712	SYK	1-10-5-0-0	10	0.098637	0.142094
19410	TTC12	1-10-5-0-0	10	0.098637	0.142094
23762	SPG11	1-10-5-0-0	10	0.098637	0.142094
2252	AL355388.3	1-80-0-0-0	9	0.0475345	0.146767
10302	CCNG1	1-80-0-0-0	9	0.0475345	0.146767
12458	AC079742.1	1-80-0-0-0	9	0.0475345	0.146767
15128	TIGD5	1-80-0-0-0	9	0.0475345	0.146767
19808	CD27	1-80-0-0-0	9	0.0475345	0.146767
25964	ZFP1	1-80-0-0-0	9	0.0475345	0.146767
26316	DPH1	1-80-0-0-0	9	0.0475345	0.146767
26522	FGF11	1-80-0-0-0	9	0.0475345	0.146767
28378	NDUFV2-AS1	1-80-0-0-0	9	0.0475345	0.146767
58	MRPL20-AS1	1-8-0-0-0	9	0.0499087	0.045089
1524	DR1	1-8-0-0-0	9	0.0499087	0.045089
4866	ACVR1C	1-8-0-0-0	9	0.0499087	0.045089
5740	CNTN4	1-8-0-0-0	9	0.0499087	0.045089
7938	NCAPG	1-8-0-0-0	9	0.0499087	0.045089
14664	AC004083.1	1-8-0-0-0	9	0.0499087	0.045089
17224	LDB3	1-8-0-0-0	9	0.0499087	0.045089
27966	AC022211.2	1-8-0-0-0	9	0.0499087	0.045089
30950	NAT14	1-8-0-0-0	9	0.0499087	0.045089
9124	AC034231.1	1-59-3-0-0	9	0.0540959	0.141884
21574	MMP17	1-59-3-0-0	9	0.0540959	0.141884
23014	LINC01220	1-59-3-0-0	9	0.0540959	0.141884
24044	AC103691.1	1-59-3-0-0	9	0.0540959	0.141884
25224	NSMCE1-DT	1-59-3-0-0	9	0.0540959	0.141884
26052	AC138304.1	1-59-3-0-0	9	0.0540959	0.141884
30292	ERFL	1-59-3-0-0	9	0.0540959	0.141884
30790	ZNF83	1-59-3-0-0	9	0.0540959	0.141884
31000	ZNF71	1-59-3-0-0	9	0.0540959	0.141884
1104	RAD54L	1-54-3-0-0	9	0.0539026	0.0914927
3448	LINC01814	1-54-3-0-0	9	0.0539026	0.0914927
6960	ITGB5	1-54-3-0-0	9	0.0539026	0.0914927
7746	CTBP1	1-54-3-0-0	9	0.0539026	0.0914927
11382	KLHDC3	1-54-3-0-0	9	0.0539026	0.0914927
17716	FAM53B-AS1	1-54-3-0-0	9	0.0539026	0.0914927
17996	TRIM34	1-54-3-0-0	9	0.0539026	0.0914927
20402	LMBR1L	1-54-3-0-0	9	0.0539026	0.0914927
20712	MARS	1-54-3-0-0	9	0.0539026	0.0914927
2096	AL450992.2	1-249-2-0-0	9	0.00505117	0
7648	UBXN7-AS1	1-249-2-0-0	9	0.00505117	0
10622	AL021328.1	1-249-2-0-0	9	0.00505117	0
14686	AC117834.2	1-249-2-0-0	9	0.00505117	0
20824	AC078777.1	1-249-2-0-0	9	0.00505117	0
22176	SPACA7	1-249-2-0-0	9	0.00505117	0
22692	AL161804.1	1-249-2-0-0	9	0.00505117	0
31870	PHACTR3	1-249-2-0-0	9	0.00505117	0
32050	JAM2	1-249-2-0-0	9	0.00505117	0
1166	AL445685.1	1-218-0-0-0	9	0.0110747	0.0234474
2880	TMCC2	1-218-0-0-0	9	0.0110747	0.0234474
11078	C2-AS1	1-218-0-0-0	9	0.0110747	0.0234474
14800	AP002907.1	1-218-0-0-0	9	0.0110747	0.0234474
16580	LINC02656	1-218-0-0-0	9	0.0110747	0.0234474
25130	DNAH3	1-218-0-0-0	9	0.0110747	0.0234474
25260	NPIPB8	1-218-0-0-0	9	0.0110747	0.0234474
27916	CD300LD	1-218-0-0-0	9	0.0110747	0.0234474
28058	AC111170.1	1-218-0-0-0	9	0.0110747	0.0234474
2502	TIPRL	1-197-0-0-0	9	0.0350656	0.102158
6110	SCN11A	1-197-0-0-0	9	0.0350656	0.102158
17278	IFIT5	1-197-0-0-0	9	0.0350656	0.102158
20558	SMUG1	1-197-0-0-0	9	0.0350656	0.102158
24064	SLC24A1	1-197-0-0-0	9	0.0350656	0.102158
27778	PRR29	1-197-0-0-0	9	0.0350656	0.102158
29074	SEMA6B	1-197-0-0-0	9	0.0350656	0.102158
29468	AC020934.2	1-197-0-0-0	9	0.0350656	0.102158
32860	DMC1	1-197-0-0-0	9	0.0350656	0.102158
4112	C2orf42	1-101-1-0-0	9	0.0432611	0.138658
7440	KCNMB3	1-101-1-0-0	9	0.0432611	0.138658
7754	CRIPAK	1-101-1-0-0	9	0.0432611	0.138658
10590	PSMG4	1-101-1-0-0	9	0.0432611	0.138658
18924	NDUFV1	1-101-1-0-0	9	0.0432611	0.138658
25980	ADAT1	1-101-1-0-0	9	0.0432611	0.138658
26224	ZNF276	1-101-1-0-0	9	0.0432611	0.138658
27136	CISD3	1-101-1-0-0	9	0.0432611	0.138658
28220	CENPX	1-101-1-0-0	9	0.0432611	0.138658
2261	LMNA_flip	1-95-3-0-0	8	0.0813624	0.196497
2599	MRPS14_flip	1-95-3-0-0	8	0.0813624	0.196497
4449	TXNDC9_flip	1-95-3-0-0	8	0.0813624	0.196497
6935	DTX3L_flip	1-95-3-0-0	8	0.0813624	0.196497
10073	ZMAT2_flip	1-95-3-0-0	8	0.0813624	0.196497
10107	ARHGAP26-AS1_flip	1-95-3-0-0	8	0.0813624	0.196497
13613	AC016831.1_flip	1-95-3-0-0	8	0.0813624	0.196497
15121	GSDMD_flip	1-95-3-0-0	8	0.0813624	0.196497
3006	SMYD2	1-77-0-0-0	8	0.0902821	0.147659
4510	UXS1	1-77-0-0-0	8	0.0902821	0.147659
10478	CLK4	1-77-0-0-0	8	0.0902821	0.147659
14350	GINS4	1-77-0-0-0	8	0.0902821	0.147659
22880	SYNJ2BP	1-77-0-0-0	8	0.0902821	0.147659
25540	BRD7	1-77-0-0-0	8	0.0902821	0.147659
31588	RPN2	1-77-0-0-0	8	0.0902821	0.147659
34200	DKC1	1-77-0-0-0	8	0.0902821	0.147659
5374	AC007038.1	1-59-2-0-0	8	0.110039	0.202918
19246	MRE11	1-59-2-0-0	8	0.110039	0.202918
25026	PARN	1-59-2-0-0	8	0.110039	0.202918
25106	VPS35L	1-59-2-0-0	8	0.110039	0.202918
25950	NPIPB15	1-59-2-0-0	8	0.110039	0.202918
26616	STX8	1-59-2-0-0	8	0.110039	0.202918
28566	KIAA1328	1-59-2-0-0	8	0.110039	0.202918
34226	TMLHE	1-59-2-0-0	8	0.110039	0.202918
11678	BACH2	1-52-0-0-0	8	0.0569152	0.0987995
12780	STK17A	1-52-0-0-0	8	0.0569152	0.0987995
26132	AC105429.1	1-52-0-0-0	8	0.0569152	0.0987995
28408	TUBB6	1-52-0-0-0	8	0.0569152	0.0987995
28628	AC016866.1	1-52-0-0-0	8	0.0569152	0.0987995
30458	DMWD	1-52-0-0-0	8	0.0569152	0.0987995
32696	MTFP1	1-52-0-0-0	8	0.0569152	0.0987995
33010	NDUFA6-DT	1-52-0-0-0	8	0.0569152	0.0987995
984	ZMYND12	1-5-2-0-0	8	0.0228414	0.0957877
998	C1orf50	1-5-2-0-0	8	0.0228414	0.0957877
8978	KLKB1	1-5-2-0-0	8	0.0228414	0.0957877
17116	AC073389.1	1-5-2-0-0	8	0.0228414	0.0957877
19444	AP000936.1	1-5-2-0-0	8	0.0228414	0.0957877
22396	NOP9	1-5-2-0-0	8	0.0228414	0.0957877
24508	RCCD1	1-5-2-0-0	8	0.0228414	0.0957877
25266	AC145285.3	1-5-2-0-0	8	0.0228414	0.0957877
3982	PUS10	1-302-0-0-0	8	0.0729113	0.109604
5684	CAPN10	1-302-0-0-0	8	0.0729113	0.109604
10646	SNRNP48	1-302-0-0-0	8	0.0729113	0.109604
12592	MPP6	1-302-0-0-0	8	0.0729113	0.109604
13216	TRIM4	1-302-0-0-0	8	0.0729113	0.109604
23910	AC018926.2	1-302-0-0-0	8	0.0729113	0.109604
25756	AC027682.6	1-302-0-0-0	8	0.0729113	0.109604
27870	ABCA5	1-302-0-0-0	8	0.0729113	0.109604
1474	AC104459.1	1-22-3-0-0	8	0.0506118	0.101956
5568	GPR55	1-22-3-0-0	8	0.0506118	0.101956
6140	ENTPD3-AS1	1-22-3-0-0	8	0.0506118	0.101956
9540	FAM151B	1-22-3-0-0	8	0.0506118	0.101956
26386	AC127521.1	1-22-3-0-0	8	0.0506118	0.101956
27322	ETV4	1-22-3-0-0	8	0.0506118	0.101956
27766	DDX42	1-22-3-0-0	8	0.0506118	0.101956
30584	NTN5	1-22-3-0-0	8	0.0506118	0.101956
1232	TTC22	1-217-0-0-0	8	0.0598674	0.0888234
4538	MTLN	1-217-0-0-0	8	0.0598674	0.0888234
6438	ABHD14A	1-217-0-0-0	8	0.0598674	0.0888234
20124	PLEKHA5	1-217-0-0-0	8	0.0598674	0.0888234
20552	ATP5MC2	1-217-0-0-0	8	0.0598674	0.0888234
22300	PRMT5	1-217-0-0-0	8	0.0598674	0.0888234
23606	KNSTRN	1-217-0-0-0	8	0.0598674	0.0888234
25222	NSMCE1	1-217-0-0-0	8	0.0598674	0.0888234
826	AGO1	1-21-0-3-0	8	0.114784	0
5198	GTF3C3	1-21-0-3-0	8	0.114784	0
8698	IL15	1-21-0-3-0	8	0.114784	0
13522	WASL	1-21-0-3-0	8	0.114784	0
15390	APTX	1-21-0-3-0	8	0.114784	0
22334	AL135999.1	1-21-0-3-0	8	0.114784	0
29874	ZNF724	1-21-0-3-0	8	0.114784	0
33732	HDAC8	1-21-0-3-0	8	0.114784	0
3684	AC104695.2	1-189-0-1-0	8	0.0609522	0.170713
8246	CDKL2	1-189-0-1-0	8	0.0609522	0.170713
9420	GTF2H2	1-189-0-1-0	8	0.0609522	0.170713
14134	AC055854.1	1-189-0-1-0	8	0.0609522	0.170713
20406	AC011603.2	1-189-0-1-0	8	0.0609522	0.170713
25398	ZNF785	1-189-0-1-0	8	0.0609522	0.170713
30762	ZNF836	1-189-0-1-0	8	0.0609522	0.170713
32976	POLR3H	1-189-0-1-0	8	0.0609522	0.170713
594	ZDHHC18	1-18-0-1-0	8	0.0474261	0.150772
6810	NEPRO	1-18-0-1-0	8	0.0474261	0.150772
10642	CAGE1	1-18-0-1-0	8	0.0474261	0.150772
11814	AL080317.2	1-18-0-1-0	8	0.0474261	0.150772
13600	CEP41	1-18-0-1-0	8	0.0474261	0.150772
23218	OTUB2	1-18-0-1-0	8	0.0474261	0.150772
31108	ZNF446	1-18-0-1-0	8	0.0474261	0.150772
31568	TGIF2	1-18-0-1-0	8	0.0474261	0.150772
1010	SLC2A1	1-160-0-0-0	8	0.0758124	0.102231
1828	TTF2	1-160-0-0-0	8	0.0758124	0.102231
2522	Z99572.1	1-160-0-0-0	8	0.0758124	0.102231
10742	AL138824.1	1-160-0-0-0	8	0.0758124	0.102231
11320	NFYA	1-160-0-0-0	8	0.0758124	0.102231
17870	DRD4	1-160-0-0-0	8	0.0758124	0.102231
20148	AC053513.2	1-160-0-0-0	8	0.0758124	0.102231
21856	NUFIP1	1-160-0-0-0	8	0.0758124	0.102231
6762	BBX	1-125-0-0-0	8	0.105499	0.539623
9120	ZFR	1-125-0-0-0	8	0.105499	0.539623
9354	PPWD1	1-125-0-0-0	8	0.105499	0.539623
11834	HDAC2	1-125-0-0-0	8	0.105499	0.539623
15682	NAA35	1-125-0-0-0	8	0.105499	0.539623
20150	ETNK1	1-125-0-0-0	8	0.105499	0.539623
24000	APH1B	1-125-0-0-0	8	0.105499	0.539623
25860	WWP2	1-125-0-0-0	8	0.105499	0.539623
615	MAP3K6_flip	1-80-1-0-0	7	0.0281648	0
3491	ODC1-DT_flip	1-80-1-0-0	7	0.0281648	0
8385	PYURF_flip	1-80-1-0-0	7	0.0281648	0
8683	SCOC-AS1_flip	1-80-1-0-0	7	0.0281648	0
18463	CNTF_flip	1-80-1-0-0	7	0.0281648	0
25447	BCKDK_flip	1-80-1-0-0	7	0.0281648	0
33841	AL035427.1_flip	1-80-1-0-0	7	0.0281648	0
5941	AC090948.3_flip	1-79-2-0-0	7	0.0554657	0.134464
18291	AL133330.1_flip	1-79-2-0-0	7	0.0554657	0.134464
19053	AP003717.1_flip	1-79-2-0-0	7	0.0554657	0.134464
19943	LINC00612_flip	1-79-2-0-0	7	0.0554657	0.134464
20727	AC025165.2_flip	1-79-2-0-0	7	0.0554657	0.134464
28419	CEP76_flip	1-79-2-0-0	7	0.0554657	0.134464
28711	LMAN1_flip	1-79-2-0-0	7	0.0554657	0.134464
10988	GTF2H4	1-73-0-0-0	7	0.0175302	0.073153
11182	SYNGAP1-AS1	1-73-0-0-0	7	0.0175302	0.073153
14110	AC105206.2	1-73-0-0-0	7	0.0175302	0.073153
15142	SCRIB	1-73-0-0-0	7	0.0175302	0.073153
26010	AC105411.1	1-73-0-0-0	7	0.0175302	0.073153
26262	TLCD3A	1-73-0-0-0	7	0.0175302	0.073153
29970	LINC01801	1-73-0-0-0	7	0.0175302	0.073153
2787	LINC00862_flip	1-70-0-0-0	7	0.0422387	0.176574
15059	ERICD_flip	1-70-0-0-0	7	0.0422387	0.176574
21133	C12orf45_flip	1-70-0-0-0	7	0.0422387	0.176574
24127	SPESP1_flip	1-70-0-0-0	7	0.0422387	0.176574
24751	PKD1_flip	1-70-0-0-0	7	0.0422387	0.176574
24901	UBALD1_flip	1-70-0-0-0	7	0.0422387	0.176574
27257	AC107993.1_flip	1-70-0-0-0	7	0.0422387	0.176574
3342	HNRNPU	1-59-0-3-0	7	0.104447	1.80293
4050	RAB1A	1-59-0-3-0	7	0.104447	1.80293
7534	TRA2B	1-59-0-3-0	7	0.104447	1.80293
18076	ZNF143	1-59-0-3-0	7	0.104447	1.80293
20210	AC022364.1	1-59-0-3-0	7	0.104447	1.80293
33388	KLHL15	1-59-0-3-0	7	0.104447	1.80293
33520	AC115618.1	1-59-0-3-0	7	0.104447	1.80293
2365	NCSTN_flip	1-52-1-0-0	7	0.0434924	0.172672
10095	PCDH12_flip	1-52-1-0-0	7	0.0434924	0.172672
19559	TECTA_flip	1-52-1-0-0	7	0.0434924	0.172672
24907	NUDT16L1_flip	1-52-1-0-0	7	0.0434924	0.172672
25877	DDX19A_flip	1-52-1-0-0	7	0.0434924	0.172672
31215	ITPA_flip	1-52-1-0-0	7	0.0434924	0.172672
31877	PPP1R3D_flip	1-52-1-0-0	7	0.0434924	0.172672
180	CAMTA1-DT	1-5-7-0-0	7	0.107124	0.157449
10880	AL021918.5	1-5-7-0-0	7	0.107124	0.157449
29332	ILF3	1-5-7-0-0	7	0.107124	0.157449
30244	C19orf54	1-5-7-0-0	7	0.107124	0.157449
30524	NAPA	1-5-7-0-0	7	0.107124	0.157449
32870	JOSD1	1-5-7-0-0	7	0.107124	0.157449
33698	CXorf65	1-5-7-0-0	7	0.107124	0.157449
1998	VPS45	1-5-5-0-0	7	0.0722185	0.197613
2966	LPGAT1	1-5-5-0-0	7	0.0722185	0.197613
13324	PRKRIP1	1-5-5-0-0	7	0.0722185	0.197613
19008	CLPB	1-5-5-0-0	7	0.0722185	0.197613
21440	KDM2B	1-5-5-0-0	7	0.0722185	0.197613
24474	SEMA4B	1-5-5-0-0	7	0.0722185	0.197613
31120	MZF1	1-5-5-0-0	7	0.0722185	0.197613
1710	AL355816.2	1-5-4-0-0	7	0.0204821	0.127209
5040	AC079305.1	1-5-4-0-0	7	0.0204821	0.127209
8688	AC096733.1	1-5-4-0-0	7	0.0204821	0.127209
14106	BMP1	1-5-4-0-0	7	0.0204821	0.127209
14356	ANK1	1-5-4-0-0	7	0.0204821	0.127209
17726	AL731577.1	1-5-4-0-0	7	0.0204821	0.127209
21744	ZAR1L	1-5-4-0-0	7	0.0204821	0.127209
4268	ELMOD3	1-5-1-1-0	7	0.109722	0.57623
12928	AC006001.2	1-5-1-1-0	7	0.109722	0.57623
13204	ZNF394	1-5-1-1-0	7	0.109722	0.57623
13928	NOM1	1-5-1-1-0	7	0.109722	0.57623
21714	POMP	1-5-1-1-0	7	0.109722	0.57623
27830	BPTF	1-5-1-1-0	7	0.109722	0.57623
33324	SYAP1	1-5-1-1-0	7	0.109722	0.57623
14704	RAD54B	1-43-0-0-0	7	0.0380113	0.0819519
17490	MFSD13A	1-43-0-0-0	7	0.0380113	0.0819519
22504	TRAPPC6B	1-43-0-0-0	7	0.0380113	0.0819519
23718	LCMT2	1-43-0-0-0	7	0.0380113	0.0819519
26830	NATD1	1-43-0-0-0	7	0.0380113	0.0819519
31180	AL121899.1	1-43-0-0-0	7	0.0380113	0.0819519
32514	YDJC	1-43-0-0-0	7	0.0380113	0.0819519
2238	GON4L	1-31-1-0-0	7	0.0845726	0.529352
3288	MTR	1-31-1-0-0	7	0.0845726	0.529352
7474	DCUN1D1	1-31-1-0-0	7	0.0845726	0.529352
10748	KIF13A	1-31-1-0-0	7	0.0845726	0.529352
21624	PSPC1	1-31-1-0-0	7	0.0845726	0.529352
21790	NHLRC3	1-31-1-0-0	7	0.0845726	0.529352
27034	CCT6B	1-31-1-0-0	7	0.0845726	0.529352
360	FBXO42	1-308-1-0-0	7	0.142555	0
4970	GORASP2	1-308-1-0-0	7	0.142555	0
5564	CAB39	1-308-1-0-0	7	0.142555	0
9882	SLC22A5	1-308-1-0-0	7	0.142555	0
15670	SLC28A3	1-308-1-0-0	7	0.142555	0
27758	MAP3K3	1-308-1-0-0	7	0.142555	0
33396	PDK3	1-308-1-0-0	7	0.142555	0
2385	ITLN1_flip	1-287-0-0-0	7	0.00394305	0
8407	GRID2_flip	1-287-0-0-0	7	0.00394305	0
8817	AC098679.5_flip	1-287-0-0-0	7	0.00394305	0
11933	TMEM200A_flip	1-287-0-0-0	7	0.00394305	0
21413	AC069234.5_flip	1-287-0-0-0	7	0.00394305	0
25911	AC009097.1_flip	1-287-0-0-0	7	0.00394305	0
33713	ITGB1BP2_flip	1-287-0-0-0	7	0.00394305	0
2970	DTL	1-286-0-0-0	7	0.0188789	0.0537855
3494	AC007314.1	1-286-0-0-0	7	0.0188789	0.0537855
8110	SGCB	1-286-0-0-0	7	0.0188789	0.0537855
11094	PPT2	1-286-0-0-0	7	0.0188789	0.0537855
16802	MACORIS	1-286-0-0-0	7	0.0188789	0.0537855
19380	C11orf1	1-286-0-0-0	7	0.0188789	0.0537855
22454	AL163973.2	1-286-0-0-0	7	0.0188789	0.0537855
2035	CTSS_flip	1-248-2-0-0	7	0.0956255	0
11163	WDR46_flip	1-248-2-0-0	7	0.0956255	0
13611	LINC00513_flip	1-248-2-0-0	7	0.0956255	0
17877	EPS8L2_flip	1-248-2-0-0	7	0.0956255	0
26803	AC004448.2_flip	1-248-2-0-0	7	0.0956255	0
30721	SIGLEC10_flip	1-248-2-0-0	7	0.0956255	0
32301	CSTB_flip	1-248-2-0-0	7	0.0956255	0
690	AL357500.1	1-219-0-0-0	7	0.0047588	0.00932033
5450	VIL1	1-219-0-0-0	7	0.0047588	0.00932033
10614	AL359643.2	1-219-0-0-0	7	0.0047588	0.00932033
15456	AL355377.3	1-219-0-0-0	7	0.0047588	0.00932033
23478	GOLGA8R	1-219-0-0-0	7	0.0047588	0.00932033
24610	Z69720.1	1-219-0-0-0	7	0.0047588	0.00932033
30360	AC006213.2	1-219-0-0-0	7	0.0047588	0.00932033
4708	MZT2B	1-217-0-0-1	7	0.0392512	0.0668927
10468	RMND5B	1-217-0-0-1	7	0.0392512	0.0668927
12058	AL355304.1	1-217-0-0-1	7	0.0392512	0.0668927
23474	FAM189A1	1-217-0-0-1	7	0.0392512	0.0668927
27126	MRPL45	1-217-0-0-1	7	0.0392512	0.0668927
27712	AC011921.1	1-217-0-0-1	7	0.0392512	0.0668927
31032	ZNF773	1-217-0-0-1	7	0.0392512	0.0668927
740	CCDC28B	1-211-2-0-0	7	0.0181314	0.0614981
11658	SRSF12	1-211-2-0-0	7	0.0181314	0.0614981
15070	AC100803.3	1-211-2-0-0	7	0.0181314	0.0614981
16482	NRARP	1-211-2-0-0	7	0.0181314	0.0614981
24854	ZSCAN32	1-211-2-0-0	7	0.0181314	0.0614981
31462	EFCAB8	1-211-2-0-0	7	0.0181314	0.0614981
33640	SPIN2B	1-211-2-0-0	7	0.0181314	0.0614981
4404	SEMA4C	1-211-0-0-0	7	0.0482786	0.207287
5462	RNF25	1-211-0-0-0	7	0.0482786	0.207287
13898	PAXIP1-AS2	1-211-0-0-0	7	0.0482786	0.207287
19806	CD27-AS1	1-211-0-0-0	7	0.0482786	0.207287
20684	PRIM1	1-211-0-0-0	7	0.0482786	0.207287
21202	USP30-AS1	1-211-0-0-0	7	0.0482786	0.207287
29520	RFX1	1-211-0-0-0	7	0.0482786	0.207287
347	SLC25A34_flip	1-210-0-0-0	7	0.100112	0
2882	NUAK2	1-210-0-0-0	7	0.100112	0
3287	ACTN2_flip	1-210-0-0-0	7	0.100112	0
10571	SERPINB9P1_flip	1-210-0-0-0	7	0.100112	0
18024	ILK	1-210-0-0-0	7	0.100112	0
31899	ADRM1_flip	1-210-0-0-0	7	0.100112	0
34237	ZFY_flip	1-210-0-0-0	7	0.100112	0
1636	AL356488.3	1-21-0-8-0	7	0.0831484	0
6006	SLC4A7	1-21-0-8-0	7	0.0831484	0
14906	ZHX1	1-21-0-8-0	7	0.0831484	0
20818	GRIP1	1-21-0-8-0	7	0.0831484	0
21536	ATP6V0A2	1-21-0-8-0	7	0.0831484	0
27592	STXBP4	1-21-0-8-0	7	0.0831484	0
27970	GRB2	1-21-0-8-0	7	0.0831484	0
11342	BYSL	1-200-3-0-0	7	0.0161369	0
16754	ENKUR	1-200-3-0-0	7	0.0161369	0
17844	AC136475.5	1-200-3-0-0	7	0.0161369	0
19610	AP000866.6	1-200-3-0-0	7	0.0161369	0
23878	MAPK6-DT	1-200-3-0-0	7	0.0161369	0
27274	TUBG1	1-200-3-0-0	7	0.0161369	0
31976	C20orf204	1-200-3-0-0	7	0.0161369	0
11482	TMEM14A	1-200-1-0-0	7	0.0146047	0.0955363
22018	AL136441.1	1-200-1-0-0	7	0.0146047	0.0955363
22252	NDRG2	1-200-1-0-0	7	0.0146047	0.0955363
29282	OLFM2	1-200-1-0-0	7	0.0146047	0.0955363
29976	ZNF30	1-200-1-0-0	7	0.0146047	0.0955363
29982	FXYD1	1-200-1-0-0	7	0.0146047	0.0955363
30742	ZNF613	1-200-1-0-0	7	0.0146047	0.0955363
5620	LINC01891	1-2-1-0-0	7	0.112242	0.136598
7496	PARL	1-2-1-0-0	7	0.112242	0.136598
11200	NUDT3	1-2-1-0-0	7	0.112242	0.136598
13296	TRIM56	1-2-1-0-0	7	0.112242	0.136598
16582	PRKCQ	1-2-1-0-0	7	0.112242	0.136598
19700	THYN1	1-2-1-0-0	7	0.112242	0.136598
33242	PRKX	1-2-1-0-0	7	0.112242	0.136598
1320	IL12RB2	1-194-0-0-0	7	0.0242177	0.141693
4884	AC009506.1	1-194-0-0-0	7	0.0242177	0.141693
7124	AC096992.2	1-194-0-0-0	7	0.0242177	0.141693
9564	ATP6AP1L	1-194-0-0-0	7	0.0242177	0.141693
19306	DYNC2H1	1-194-0-0-0	7	0.0242177	0.141693
24650	JMJD8	1-194-0-0-0	7	0.0242177	0.141693
31776	AL133230.1	1-194-0-0-0	7	0.0242177	0.141693
906	MACF1	1-191-0-1-0	7	0.116198	0
4022	VPS54	1-191-0-1-0	7	0.116198	0
5752	SUMF1	1-191-0-1-0	7	0.116198	0
10952	GNL1	1-191-0-1-0	7	0.116198	0
19134	AAMDC	1-191-0-1-0	7	0.116198	0
20166	ETFRF1	1-191-0-1-0	7	0.116198	0
25525	AC026470.2_flip	1-191-0-1-0	7	0.116198	0
11402	AL359813.1	1-135-0-0-0	7	0.0266926	0.117739
15270	AK3	1-135-0-0-0	7	0.0266926	0.117739
19286	CNTN5	1-135-0-0-0	7	0.0266926	0.117739
20642	AC034102.5	1-135-0-0-0	7	0.0266926	0.117739
26384	SPNS3	1-135-0-0-0	7	0.0266926	0.117739
31196	EBF4	1-135-0-0-0	7	0.0266926	0.117739
33720	CXCR3	1-135-0-0-0	7	0.0266926	0.117739
326	AL031283.1	1-133-3-0-0	7	0.0194944	0
1054	KIF2C	1-133-3-0-0	7	0.0194944	0
9156	AC008957.1	1-133-3-0-0	7	0.0194944	0
10530	LINC01962	1-133-3-0-0	7	0.0194944	0
11430	AL109615.3	1-133-3-0-0	7	0.0194944	0
15044	FAM135B	1-133-3-0-0	7	0.0194944	0
33078	RIBC2	1-133-3-0-0	7	0.0194944	0
13994	PPP1R3B	1-133-0-0-0	7	0.0207819	0.111649
15454	DNAJB5	1-133-0-0-0	7	0.0207819	0.111649
23514	AC123768.3	1-133-0-0-0	7	0.0207819	0.111649
25218	ZKSCAN2-DT	1-133-0-0-0	7	0.0207819	0.111649
26100	GINS2	1-133-0-0-0	7	0.0207819	0.111649
33038	BIK	1-133-0-0-0	7	0.0207819	0.111649
33264	WWC3-AS1	1-133-0-0-0	7	0.0207819	0.111649
1280	ATG4C	1-118-1-0-0	7	0.115931	0.174826
3062	DISP1	1-118-1-0-0	7	0.115931	0.174826
4042	LINC02245	1-118-1-0-0	7	0.115931	0.174826
11356	UBR2	1-118-1-0-0	7	0.115931	0.174826
11838	NT5DC1	1-118-1-0-0	7	0.115931	0.174826
12498	PHF14	1-118-1-0-0	7	0.115931	0.174826
28458	ABHD3	1-118-1-0-0	7	0.115931	0.174826
1256	LINC01135	1-101-0-0-1	7	0.0967999	0.151244
13952	AC004908.2	1-101-0-0-1	7	0.0967999	0.151244
20242	SINHCAF	1-101-0-0-1	7	0.0967999	0.151244
20812	TMBIM4	1-101-0-0-1	7	0.0967999	0.151244
25172	NPIPB5	1-101-0-0-1	7	0.0967999	0.151244
27404	PLEKHM1	1-101-0-0-1	7	0.0967999	0.151244
29946	PEPD	1-101-0-0-1	7	0.0967999	0.151244
3096	SRP9	1-10-6-0-0	7	0.0772389	0.305967
8926	RWDD4	1-10-6-0-0	7	0.0772389	0.305967
8988	SDHA	1-10-6-0-0	7	0.0772389	0.305967
11538	SMAP1	1-10-6-0-0	7	0.0772389	0.305967
14068	PCM1	1-10-6-0-0	7	0.0772389	0.305967
14252	WRN	1-10-6-0-0	7	0.0772389	0.305967
20302	ZCRB1	1-10-6-0-0	7	0.0772389	0.305967
448	LINC00339	1-93-0-5-0	6	0.063963	0.147301
878	C1orf122	1-93-0-5-0	6	0.063963	0.147301
3090	LBR	1-93-0-5-0	6	0.063963	0.147301
13964	ARHGEF10	1-93-0-5-0	6	0.063963	0.147301
20560	CBX5	1-93-0-5-0	6	0.063963	0.147301
32606	ASPHD2	1-93-0-5-0	6	0.063963	0.147301
4068	PNO1	1-93-0-4-0	6	0.100961	0.197681
7786	FAM193A	1-93-0-4-0	6	0.100961	0.197681
12978	EIF4H	1-93-0-4-0	6	0.100961	0.197681
20380	CCNT1	1-93-0-4-0	6	0.100961	0.197681
23356	MARK3	1-93-0-4-0	6	0.100961	0.197681
33354	SH3KBP1	1-93-0-4-0	6	0.100961	0.197681
6434	RRP9	1-91-5-0-0	6	0.0203166	0.109827
7756	AC147067.1	1-91-5-0-0	6	0.0203166	0.109827
9790	AC034236.2	1-91-5-0-0	6	0.0203166	0.109827
10374	BOD1	1-91-5-0-0	6	0.0203166	0.109827
18652	MACROD1	1-91-5-0-0	6	0.0203166	0.109827
20384	RND1	1-91-5-0-0	6	0.0203166	0.109827
6342	C3orf62	1-87-0-0-0	6	0.0497573	0.13503
10036	AC011379.2	1-87-0-0-0	6	0.0497573	0.13503
13198	CPSF4	1-87-0-0-0	6	0.0497573	0.13503
18714	PPP2R5B	1-87-0-0-0	6	0.0497573	0.13503
26098	GSE1	1-87-0-0-0	6	0.0497573	0.13503
34098	LINC00893	1-87-0-0-0	6	0.0497573	0.13503
3122	PARP1	1-85-2-0-0	6	0.0417489	0.117278
4694	AMMECR1L	1-85-2-0-0	6	0.0417489	0.117278
15294	RANBP6	1-85-2-0-0	6	0.0417489	0.117278
15750	SUSD3	1-85-2-0-0	6	0.0417489	0.117278
21184	ISCU	1-85-2-0-0	6	0.0417489	0.117278
21364	PEBP1	1-85-2-0-0	6	0.0417489	0.117278
12615	AC004540.2_flip	1-80-2-0-0	6	0.0334557	0.145575
14169	ADAM28_flip	1-80-2-0-0	6	0.0334557	0.145575
16591	ITIH2_flip	1-80-2-0-0	6	0.0334557	0.145575
21141	C12orf75_flip	1-80-2-0-0	6	0.0334557	0.145575
21543	AC068790.7_flip	1-80-2-0-0	6	0.0334557	0.145575
30423	NKPD1_flip	1-80-2-0-0	6	0.0334557	0.145575
1082	MMACHC	1-80-0-1-0	6	0.103759	0.190382
4888	2023-03-07	1-80-0-1-0	6	0.103759	0.190382
8804	CTSO	1-80-0-1-0	6	0.103759	0.190382
9680	RIOK2	1-80-0-1-0	6	0.103759	0.190382
20324	SCAF11	1-80-0-1-0	6	0.103759	0.190382
24452	FANCI	1-80-0-1-0	6	0.103759	0.190382
8461	AF213884.3_flip	1-8-7-0-0	6	0.15017	0.276131
12505	TMEM106B_flip	1-8-7-0-0	6	0.15017	0.276131
17771	BNIP3_flip	1-8-7-0-0	6	0.15017	0.276131
17917	DUSP8_flip	1-8-7-0-0	6	0.15017	0.276131
26303	WDR81_flip	1-8-7-0-0	6	0.15017	0.276131
29495	IER2_flip	1-8-7-0-0	6	0.15017	0.276131
4242	TACR1	1-77-0-1-0	6	0.0729233	0.0774739
10696	EDN1	1-77-0-1-0	6	0.0729233	0.0774739
17582	SMC3	1-77-0-1-0	6	0.0729233	0.0774739
24346	TMC3-AS1	1-77-0-1-0	6	0.0729233	0.0774739
26568	TRAPPC1	1-77-0-1-0	6	0.0729233	0.0774739
33660	AMER1	1-77-0-1-0	6	0.0729233	0.0774739
3604	AC104699.1	1-7-3-0-0	6	0.0560013	0.131312
6888	AC092910.3	1-7-3-0-0	6	0.0560013	0.131312
19598	NRGN	1-7-3-0-0	6	0.0560013	0.131312
23106	AL136040.2	1-7-3-0-0	6	0.0560013	0.131312
25666	SETD6	1-7-3-0-0	6	0.0560013	0.131312
26940	GIT1	1-7-3-0-0	6	0.0560013	0.131312
5932	DPH3	1-7-2-1-0	6	0.12751	0
6634	LINC00877	1-7-2-1-0	6	0.12751	0
8306	AC124016.1	1-7-2-1-0	6	0.12751	0
24888	DNAJA3	1-7-2-1-0	6	0.12751	0
31510	TP53INP2	1-7-2-1-0	6	0.12751	0
34214	BRCC3	1-7-2-1-0	6	0.12751	0
266	EXOSC10	1-7-1-0-0	6	0.0792558	0.162758
808	ZMYM4-AS1	1-7-1-0-0	6	0.0792558	0.162758
1030	ST3GAL3	1-7-1-0-0	6	0.0792558	0.162758
4876	PKP4	1-7-1-0-0	6	0.0792558	0.162758
24140	UACA	1-7-1-0-0	6	0.0792558	0.162758
33310	CLTRN	1-7-1-0-0	6	0.0792558	0.162758
3274	GPR137B	1-58-4-0-0	6	0.0937007	0.187241
7666	SENP5	1-58-4-0-0	6	0.0937007	0.187241
9028	ICE1	1-58-4-0-0	6	0.0937007	0.187241
10938	TRIM26	1-58-4-0-0	6	0.0937007	0.187241
21230	TCHP	1-58-4-0-0	6	0.0937007	0.187241
22916	RBM25	1-58-4-0-0	6	0.0937007	0.187241
1518	TMED5	1-58-0-2-0	6	0.142178	0
6672	ZNF654	1-58-0-2-0	6	0.142178	0
15578	FXN	1-58-0-2-0	6	0.142178	0
18304	TRAF6	1-58-0-2-0	6	0.142178	0
22706	ARID4A	1-58-0-2-0	6	0.142178	0
29950	LSM14A	1-58-0-2-0	6	0.142178	0
14898	AC104316.1	1-58-0-1-0	6	0.116045	0
18162	PIK3C2A	1-58-0-1-0	6	0.116045	0
23270	SETD3	1-58-0-1-0	6	0.116045	0
26410	CHRNE	1-58-0-1-0	6	0.116045	0
26850	NLK	1-58-0-1-0	6	0.116045	0
28610	IER3IP1	1-58-0-1-0	6	0.116045	0
2671	RNASEL_flip	1-52-2-0-0	6	0.0295492	0.120423
12925	AC008267.5_flip	1-52-2-0-0	6	0.0295492	0.120423
13539	AC073934.1_flip	1-52-2-0-0	6	0.0295492	0.120423
23341	AL132801.1_flip	1-52-2-0-0	6	0.0295492	0.120423
30803	ZNF320_flip	1-52-2-0-0	6	0.0295492	0.120423
32365	SPATC1L_flip	1-52-2-0-0	6	0.0295492	0.120423
16078	STRBP	1-50-6-0-0	6	0.108594	0
24342	STARD5	1-50-6-0-0	6	0.108594	0
25415	RNF40_flip	1-50-6-0-0	6	0.108594	0
27757	TACO1_flip	1-50-6-0-0	6	0.108594	0
29087	AC005523.2_flip	1-50-6-0-0	6	0.108594	0
31762	UBE2V1	1-50-6-0-0	6	0.108594	0
2170	KCNN3	1-50-3-0-0	6	0.0606747	0.150015
2548	PIGC	1-50-3-0-0	6	0.0606747	0.150015
6624	FOXP1-IT1	1-50-3-0-0	6	0.0606747	0.150015
6894	NDUFB4	1-50-3-0-0	6	0.0606747	0.150015
8578	METTL14	1-50-3-0-0	6	0.0606747	0.150015
26862	SARM1	1-50-3-0-0	6	0.0606747	0.150015
15038	KHDRBS3	1-45-0-0-0	6	0.0475336	0.0744617
16524	ADARB2	1-45-0-0-0	6	0.0475336	0.0744617
16544	AKR1C3	1-45-0-0-0	6	0.0475336	0.0744617
23274	CCDC85C	1-45-0-0-0	6	0.0475336	0.0744617
25948	AC009053.2	1-45-0-0-0	6	0.0475336	0.0744617
33072	UPK3A	1-45-0-0-0	6	0.0475336	0.0744617
252	PEX14	1-40-2-0-0	6	0.0679244	0.161598
390	ARHGEF10L	1-40-2-0-0	6	0.0679244	0.161598
928	TRIT1	1-40-2-0-0	6	0.0679244	0.161598
7994	PGM2	1-40-2-0-0	6	0.0679244	0.161598
14974	PVT1	1-40-2-0-0	6	0.0679244	0.161598
30820	ZNF845	1-40-2-0-0	6	0.0679244	0.161598
1294	CACHD1	1-38-3-0-0	6	0.0730742	0.0670377
12848	HUS1	1-38-3-0-0	6	0.0730742	0.0670377
14386	FNTA	1-38-3-0-0	6	0.0730742	0.0670377
15536	SLC25A51	1-38-3-0-0	6	0.0730742	0.0670377
15550	FAM27C	1-38-3-0-0	6	0.0730742	0.0670377
30404	AC011481.1	1-38-3-0-0	6	0.0730742	0.0670377
18542	PPP1R32	1-38-2-0-0	6	0.0185095	0.0761141
24082	AC116913.1	1-38-2-0-0	6	0.0185095	0.0761141
25300	AC009093.4	1-38-2-0-0	6	0.0185095	0.0761141
26960	SLC6A4	1-38-2-0-0	6	0.0185095	0.0761141
28680	AC012301.1	1-38-2-0-0	6	0.0185095	0.0761141
31820	CSTF1	1-38-2-0-0	6	0.0185095	0.0761141
3786	QPCT	1-37-5-0-0	6	0.0229638	0.132482
4668	CNTNAP5	1-37-5-0-0	6	0.0229638	0.132482
17118	AC073389.2	1-37-5-0-0	6	0.0229638	0.132482
27456	MRPL10	1-37-5-0-0	6	0.0229638	0.132482
28346	DLGAP1-AS1	1-37-5-0-0	6	0.0229638	0.132482
32282	ERVH48-1	1-37-5-0-0	6	0.0229638	0.132482
1203	LRP8_flip	1-37-4-0-0	6	0.0230123	0.173505
4907	DPP4_flip	1-37-4-0-0	6	0.0230123	0.173505
15853	ANKS6_flip	1-37-4-0-0	6	0.0230123	0.173505
17023	HKDC1_flip	1-37-4-0-0	6	0.0230123	0.173505
21363	VSIG10_flip	1-37-4-0-0	6	0.0230123	0.173505
22847	AL133370.1_flip	1-37-4-0-0	6	0.0230123	0.173505
14970	CASC11	1-368-0-0-0	6	0.00411376	0
16694	ST8SIA6-AS1	1-368-0-0-0	6	0.00411376	0
17026	TACR2	1-368-0-0-0	6	0.00411376	0
17840	AC136475.1	1-368-0-0-0	6	0.00411376	0
24424	AC087286.1	1-368-0-0-0	6	0.00411376	0
31484	RALY-AS1	1-368-0-0-0	6	0.00411376	0
1638	TMEM167B	1-359-0-0-0	6	0.0643286	0
6882	AC023494.1	1-359-0-0-0	6	0.0643286	0
8232	MTHFD2L	1-359-0-0-0	6	0.0643286	0
8584	USP53	1-359-0-0-0	6	0.0643286	0
31420	AL110115.2	1-359-0-0-0	6	0.0643286	0
32702	SLC35E4	1-359-0-0-0	6	0.0643286	0
978	AC093151.2	1-357-0-0-0	6	0.00305964	0.0211915
16760	AL390961.2	1-357-0-0-0	6	0.00305964	0.0211915
18754	TIGD3	1-357-0-0-0	6	0.00305964	0.0211915
22234	AL355075.1	1-357-0-0-0	6	0.00305964	0.0211915
29620	AC008764.6	1-357-0-0-0	6	0.00305964	0.0211915
30716	C19orf84	1-357-0-0-0	6	0.00305964	0.0211915
3318	AL606534.1	1-323-3-0-0	6	0.0111802	0
4108	AC016700.3	1-323-3-0-0	6	0.0111802	0
8940	LINC02427	1-323-3-0-0	6	0.0111802	0
14556	RDH10	1-323-3-0-0	6	0.0111802	0
15938	AL162414.1	1-323-3-0-0	6	0.0111802	0
16036	B3GNT10	1-323-3-0-0	6	0.0111802	0
11584	MEI4	1-323-2-0-0	6	0.0105069	0
13712	DENND2A	1-323-2-0-0	6	0.0105069	0
17438	SEMA4G	1-323-2-0-0	6	0.0105069	0
18468	AP001636.3	1-323-2-0-0	6	0.0105069	0
19038	AP000763.4	1-323-2-0-0	6	0.0105069	0
28466	GATA6	1-323-2-0-0	6	0.0105069	0
3159	TRIM17_flip	1-32-0-0-0	6	0.0348004	0.0809329
5813	RPUSD3_flip	1-32-0-0-0	6	0.0348004	0.0809329
6359	APEH_flip	1-32-0-0-0	6	0.0348004	0.0809329
6985	CHST13_flip	1-32-0-0-0	6	0.0348004	0.0809329
23887	AC023906.4_flip	1-32-0-0-0	6	0.0348004	0.0809329
31481	ZNF341-AS1_flip	1-32-0-0-0	6	0.0348004	0.0809329
3250	AL391832.2	1-31-3-0-0	6	0.0597799	0
12148	ZBTB2	1-31-3-0-0	6	0.0597799	0
20252	AC023157.3	1-31-3-0-0	6	0.0597799	0
22278	TRDC	1-31-3-0-0	6	0.0597799	0
22320	PPP1R3E	1-31-3-0-0	6	0.0597799	0
28238	CSNK1D	1-31-3-0-0	6	0.0597799	0
5248	BZW1	1-31-2-0-0	6	0.0907948	0.402718
8094	TXK	1-31-2-0-0	6	0.0907948	0.402718
10012	PAIP2	1-31-2-0-0	6	0.0907948	0.402718
14180	PPP2R2A	1-31-2-0-0	6	0.0907948	0.402718
30218	AKT2	1-31-2-0-0	6	0.0907948	0.402718
31784	ADNP	1-31-2-0-0	6	0.0907948	0.402718
4622	DPP10	1-292-0-1-0	6	0.00800156	0
7370	SERPINI2	1-292-0-1-0	6	0.00800156	0
8482	CXXC4-AS1	1-292-0-1-0	6	0.00800156	0
10830	HIST1H2AD	1-292-0-1-0	6	0.00800156	0
17394	CNNM1	1-292-0-1-0	6	0.00800156	0
21062	LINC02453	1-292-0-1-0	6	0.00800156	0
2384	ITLN1	1-292-0-0-0	6	0.00401727	0
2456	AL592435.1	1-292-0-0-0	6	0.00401727	0
8816	AC098679.5	1-292-0-0-0	6	0.00401727	0
21412	AC069234.5	1-292-0-0-0	6	0.00401727	0
25910	AC009097.1	1-292-0-0-0	6	0.00401727	0
27988	ITGB4	1-292-0-0-0	6	0.00401727	0
4623	DPP10_flip	1-287-0-1-0	6	0.00800156	0
7371	SERPINI2_flip	1-287-0-1-0	6	0.00800156	0
8483	CXXC4-AS1_flip	1-287-0-1-0	6	0.00800156	0
10831	HIST1H2AD_flip	1-287-0-1-0	6	0.00800156	0
17395	CNNM1_flip	1-287-0-1-0	6	0.00800156	0
21063	LINC02453_flip	1-287-0-1-0	6	0.00800156	0
580	ZNF683	1-276-0-0-0	6	0.0298738	0
3010	KCTD3	1-276-0-0-0	6	0.0298738	0
5522	AC073052.2	1-276-0-0-0	6	0.0298738	0
15040	AC046195.1	1-276-0-0-0	6	0.0298738	0
24008	FBXL22	1-276-0-0-0	6	0.0298738	0
25652	USB1	1-276-0-0-0	6	0.0298738	0
1278	AC103923.1	1-275-1-0-0	6	0.00319651	0
3338	BX323046.2	1-275-1-0-0	6	0.00319651	0
7614	XXYLT1-AS2	1-275-1-0-0	6	0.00319651	0
16132	AL450263.1	1-275-1-0-0	6	0.00319651	0
27026	AC005899.8	1-275-1-0-0	6	0.00319651	0
33634	AL354793.1	1-275-1-0-0	6	0.00319651	0
1694	KCNA2	1-249-1-0-0	6	0.00211847	0
17196	SFTPD-AS1	1-249-1-0-0	6	0.00211847	0
18818	TSGA10IP	1-249-1-0-0	6	0.00211847	0
24578	AC087762.1	1-249-1-0-0	6	0.00211847	0
32234	AF129408.1	1-249-1-0-0	6	0.00211847	0
34016	RAB33A	1-249-1-0-0	6	0.00211847	0
5404	MREG	1-247-1-0-0	6	0.0267061	0.110947
13228	AP4M1	1-247-1-0-0	6	0.0267061	0.110947
13748	KEL	1-247-1-0-0	6	0.0267061	0.110947
20574	GPR84	1-247-1-0-0	6	0.0267061	0.110947
22174	TEX29	1-247-1-0-0	6	0.0267061	0.110947
30398	NECTIN2	1-247-1-0-0	6	0.0267061	0.110947
5050	TTC30A	1-247-0-0-0	6	0.0118968	0.0719453
10806	HIST1H3A	1-247-0-0-0	6	0.0118968	0.0719453
12616	AC004540.1	1-247-0-0-0	6	0.0118968	0.0719453
20722	DTX3	1-247-0-0-0	6	0.0118968	0.0719453
22124	LINC01309	1-247-0-0-0	6	0.0118968	0.0719453
26640	TMEM220	1-247-0-0-0	6	0.0118968	0.0719453
4139	NAGK_flip	1-235-2-0-0	6	0.0987346	0
6656	ZNF717	1-235-2-0-0	6	0.0987346	0
14294	ASH2L	1-235-2-0-0	6	0.0987346	0
17330	TCTN3	1-235-2-0-0	6	0.0987346	0
30507	BBC3_flip	1-235-2-0-0	6	0.0987346	0
33346	AL732509.1	1-235-2-0-0	6	0.0987346	0
9902	SEPTIN8	1-233-0-0-0	6	0.0545173	0.148393
10774	SOX4	1-233-0-0-0	6	0.0545173	0.148393
20326	SLC38A1	1-233-0-0-0	6	0.0545173	0.148393
23364	AL139300.2	1-233-0-0-0	6	0.0545173	0.148393
24822	KREMEN2	1-233-0-0-0	6	0.0545173	0.148393
30646	PRMT1	1-233-0-0-0	6	0.0545173	0.148393
2210	GBA	1-229-0-0-0	6	0.106613	0.124977
3646	MPV17	1-229-0-0-0	6	0.106613	0.124977
4536	RGPD5	1-229-0-0-0	6	0.106613	0.124977
13784	PDIA4	1-229-0-0-0	6	0.106613	0.124977
20678	ATP5F1B	1-229-0-0-0	6	0.106613	0.124977
25670	AC009118.3	1-229-0-0-0	6	0.106613	0.124977
9682	AC008883.1	1-22-5-0-0	6	0.0248885	0.0257032
11510	AL021368.5	1-22-5-0-0	6	0.0248885	0.0257032
17096	DNAJC9-AS1	1-22-5-0-0	6	0.0248885	0.0257032
17494	AL121928.1	1-22-5-0-0	6	0.0248885	0.0257032
30084	ZNF568	1-22-5-0-0	6	0.0248885	0.0257032
30688	SPIB	1-22-5-0-0	6	0.0248885	0.0257032
2250	AL355388.1	1-219-1-1-0	6	0.00738598	0
14642	AC023194.3	1-219-1-1-0	6	0.00738598	0
21312	IQCD	1-219-1-1-0	6	0.00738598	0
22258	TMEM253	1-219-1-1-0	6	0.00738598	0
26364	P2RX5	1-219-1-1-0	6	0.00738598	0
26624	CFAP52	1-219-1-1-0	6	0.00738598	0
3528	VSNL1	1-219-0-1-0	6	0.00481318	0
7020	AC112484.5	1-219-0-1-0	6	0.00481318	0
10886	HIST1H4J	1-219-0-1-0	6	0.00481318	0
12604	AC005165.1	1-219-0-1-0	6	0.00481318	0
17448	KAZALD1	1-219-0-1-0	6	0.00481318	0
32268	RSPH1	1-219-0-1-0	6	0.00481318	0
9664	AC020900.1	1-218-0-0-1	6	0.00728342	0.0253709
13462	DOCK4-AS1	1-218-0-0-1	6	0.00728342	0.0253709
15286	AL136980.1	1-218-0-0-1	6	0.00728342	0.0253709
16810	AL391839.2	1-218-0-0-1	6	0.00728342	0.0253709
26800	RNF112	1-218-0-0-1	6	0.00728342	0.0253709
29568	OR7C1	1-218-0-0-1	6	0.00728342	0.0253709
2504	SFT2D2	1-21-0-25-0	6	0.1157	0
5350	CREB1	1-21-0-25-0	6	0.1157	0
10506	RNF130	1-21-0-25-0	6	0.1157	0
11706	PNISR	1-21-0-25-0	6	0.1157	0
13630	CHCHD3	1-21-0-25-0	6	0.1157	0
17050	SGPL1	1-21-0-25-0	6	0.1157	0
6688	EPHA6	1-204-0-0-0	6	0.00608256	0.0103989
6806	AC074044.1	1-204-0-0-0	6	0.00608256	0.0103989
11596	LCA5	1-204-0-0-0	6	0.00608256	0.0103989
23484	GOLGA8H	1-204-0-0-0	6	0.00608256	0.0103989
28334	AP005329.3	1-204-0-0-0	6	0.00608256	0.0103989
31002	SMIM17	1-204-0-0-0	6	0.00608256	0.0103989
8715	AC107223.1_flip	1-2-4-0-0	6	0.0219727	0
10987	LINC00243_flip	1-2-4-0-0	6	0.0219727	0
18507	CCDC86_flip	1-2-4-0-0	6	0.0219727	0
25291	AC109460.1_flip	1-2-4-0-0	6	0.0219727	0
27213	KRT10_flip	1-2-4-0-0	6	0.0219727	0
34235	AC006157.1_flip	1-2-4-0-0	6	0.0219727	0
4369	ASTL_flip	1-2-12-0-0	6	0.165673	0
16687	VIM-AS1_flip	1-2-12-0-0	6	0.165673	0
22489	NFKBIA_flip	1-2-12-0-0	6	0.165673	0
26555	KDM6B_flip	1-2-12-0-0	6	0.165673	0
27093	CCL3L1_flip	1-2-12-0-0	6	0.165673	0
29299	AC011511.2_flip	1-2-12-0-0	6	0.165673	0
388	RCC2	1-191-1-0-0	6	0.090091	0.228383
9796	SEMA6A	1-191-1-0-0	6	0.090091	0.228383
12446	USP42	1-191-1-0-0	6	0.090091	0.228383
26738	SREBF1	1-191-1-0-0	6	0.090091	0.228383
27798	CEP95	1-191-1-0-0	6	0.090091	0.228383
28096	TIMP2	1-191-1-0-0	6	0.090091	0.228383
1020	MED8	1-183-0-0-0	6	0.0282649	0.0704173
9678	LIX1-AS1	1-183-0-0-0	6	0.0282649	0.0704173
17034	AIFM2	1-183-0-0-0	6	0.0282649	0.0704173
19146	KCTD21-AS1	1-183-0-0-0	6	0.0282649	0.0704173
22530	FKBP3	1-183-0-0-0	6	0.0282649	0.0704173
33998	XPNPEP2	1-183-0-0-0	6	0.0282649	0.0704173
3212	SPRTN	1-182-2-0-0	6	0.0854947	0.190622
4202	SLC4A5	1-182-2-0-0	6	0.0854947	0.190622
14902	TBC1D31	1-182-2-0-0	6	0.0854947	0.190622
21602	CHFR	1-182-2-0-0	6	0.0854947	0.190622
23024	FLVCR2	1-182-2-0-0	6	0.0854947	0.190622
24868	DNASE1	1-182-2-0-0	6	0.0854947	0.190622
9364	NLN	1-18-5-0-0	6	0.130958	0.197425
11218	ANKS1A	1-18-5-0-0	6	0.130958	0.197425
14836	OXR1	1-18-5-0-0	6	0.130958	0.197425
23992	TPM1	1-18-5-0-0	6	0.130958	0.197425
24934	ABAT	1-18-5-0-0	6	0.130958	0.197425
29336	DNM2	1-18-5-0-0	6	0.130958	0.197425
3814	DHX57	1-177-3-0-0	6	0.0939015	0
5376	AC006994.2	1-177-3-0-0	6	0.0939015	0
11210	AL451165.2	1-177-3-0-0	6	0.0939015	0
17974	NUP98	1-177-3-0-0	6	0.0939015	0
30718	AC008750.7	1-177-3-0-0	6	0.0939015	0
32338	ITGB2-AS1	1-177-3-0-0	6	0.0939015	0
1390	AC103591.3	1-173-3-0-0	6	0.129518	0
3690	AC104695.3	1-173-3-0-0	6	0.129518	0
11454	SUPT3H	1-173-3-0-0	6	0.129518	0
23872	AC090971.1	1-173-3-0-0	6	0.129518	0
29238	HNRNPM	1-173-3-0-0	6	0.129518	0
33420	RPGR	1-173-3-0-0	6	0.129518	0
2710	AL078644.2	1-173-1-0-0	6	0.0609785	0
15034	AC083843.2	1-173-1-0-0	6	0.0609785	0
16006	AL138895.1	1-173-1-0-0	6	0.0609785	0
25128	LYRM1	1-173-1-0-0	6	0.0609785	0
30348	CADM4	1-173-1-0-0	6	0.0609785	0
32674	AC003681.1	1-173-1-0-0	6	0.0609785	0
1858	AC253572.2	1-173-0-0-0	6	0.153916	0.260372
10168	TIGD6	1-173-0-0-0	6	0.153916	0.260372
14072	AC124242.1	1-173-0-0-0	6	0.153916	0.260372
14802	KLF10	1-173-0-0-0	6	0.153916	0.260372
23792	AC090527.3	1-173-0-0-0	6	0.153916	0.260372
32836	MICALL1	1-173-0-0-0	6	0.153916	0.260372
5343	MYOSLID_flip	1-170-4-0-0	6	0.119851	0
10120	PLAC8L1	1-170-4-0-0	6	0.119851	0
13409	AC007032.1_flip	1-170-4-0-0	6	0.119851	0
22655	MAPK1IP1L_flip	1-170-4-0-0	6	0.119851	0
23786	AC025580.1	1-170-4-0-0	6	0.119851	0
31368	THBD	1-170-4-0-0	6	0.119851	0
1391	AC103591.3_flip	1-170-3-0-0	6	0.129518	0
3691	AC104695.3_flip	1-170-3-0-0	6	0.129518	0
11455	SUPT3H_flip	1-170-3-0-0	6	0.129518	0
23873	AC090971.1_flip	1-170-3-0-0	6	0.129518	0
29239	HNRNPM_flip	1-170-3-0-0	6	0.129518	0
33421	RPGR_flip	1-170-3-0-0	6	0.129518	0
2711	AL078644.2_flip	1-170-1-0-0	6	0.0609785	0
15035	AC083843.2_flip	1-170-1-0-0	6	0.0609785	0
16007	AL138895.1_flip	1-170-1-0-0	6	0.0609785	0
25129	LYRM1_flip	1-170-1-0-0	6	0.0609785	0
30349	CADM4_flip	1-170-1-0-0	6	0.0609785	0
32675	AC003681.1_flip	1-170-1-0-0	6	0.0609785	0
1859	AC253572.2_flip	1-170-0-0-0	6	0.153916	0.260372
10169	TIGD6_flip	1-170-0-0-0	6	0.153916	0.260372
14073	AC124242.1_flip	1-170-0-0-0	6	0.153916	0.260372
14803	KLF10_flip	1-170-0-0-0	6	0.153916	0.260372
23793	AC090527.3_flip	1-170-0-0-0	6	0.153916	0.260372
32837	MICALL1_flip	1-170-0-0-0	6	0.153916	0.260372
394	IFFO2	1-168-2-0-0	6	0.641053	0
3980	REL	1-168-2-0-0	6	0.641053	0
7048	IFT122	1-168-2-0-0	6	0.641053	0
9100	LINC02241	1-168-2-0-0	6	0.641053	0
20814	IRAK3	1-168-2-0-0	6	0.641053	0
22648	GCH1	1-168-2-0-0	6	0.641053	0
1532	DNTTIP2	1-163-2-0-0	6	0.0915115	0.123759
1580	CDC14A	1-163-2-0-0	6	0.0915115	0.123759
7192	TRPC1	1-163-2-0-0	6	0.0915115	0.123759
10460	AC106795.3	1-163-2-0-0	6	0.0915115	0.123759
11216	TAF11	1-163-2-0-0	6	0.0915115	0.123759
20724	OS9	1-163-2-0-0	6	0.0915115	0.123759
783	TRIM62_flip	1-162-2-0-0	6	0.0780926	0.210266
2965	SLC30A1_flip	1-162-2-0-0	6	0.0780926	0.210266
4353	MRPS5_flip	1-162-2-0-0	6	0.0780926	0.210266
18551	FADS2_flip	1-162-2-0-0	6	0.0780926	0.210266
22501	SEC23A_flip	1-162-2-0-0	6	0.0780926	0.210266
30419	MARK4_flip	1-162-2-0-0	6	0.0780926	0.210266
5902	FGD5-AS1	1-158-0-0-0	6	0.0419731	0.0961155
24704	IFT140	1-158-0-0-0	6	0.0419731	0.0961155
27398	SPATA32	1-158-0-0-0	6	0.0419731	0.0961155
28020	RNF157	1-158-0-0-0	6	0.0419731	0.0961155
32828	H1F0	1-158-0-0-0	6	0.0419731	0.0961155
33254	PNPLA4	1-158-0-0-0	6	0.0419731	0.0961155
494	PITHD1	1-143-0-0-0	6	0.0781128	0.140282
4300	PTCD3	1-143-0-0-0	6	0.0781128	0.140282
4990	ITGA6	1-143-0-0-0	6	0.0781128	0.140282
5314	ICOS	1-143-0-0-0	6	0.0781128	0.140282
23980	RORA	1-143-0-0-0	6	0.0781128	0.140282
33278	MSL3	1-143-0-0-0	6	0.0781128	0.140282
8248	G3BP2	1-139-3-0-0	6	0.0762186	0
19000	LAMTOR1	1-139-3-0-0	6	0.0762186	0
23650	CHP1	1-139-3-0-0	6	0.0762186	0
24622	AXIN1	1-139-3-0-0	6	0.0762186	0
26876	SPAG5-AS1	1-139-3-0-0	6	0.0762186	0
28410	AFG3L2	1-139-3-0-0	6	0.0762186	0
13358	LRRC17	1-133-1-0-0	6	0.00545653	0.0229453
22044	AL590807.1	1-133-1-0-0	6	0.00545653	0.0229453
22354	FITM1	1-133-1-0-0	6	0.00545653	0.0229453
25192	AC008870.4	1-133-1-0-0	6	0.00545653	0.0229453
29354	SPC24	1-133-1-0-0	6	0.00545653	0.0229453
30254	CYP2S1	1-133-1-0-0	6	0.00545653	0.0229453
13458	LRRN3	1-132-3-0-0	6	0.0876478	0
14337	ADAM32_flip	1-132-3-0-0	6	0.0876478	0
20845	AC025423.1_flip	1-132-3-0-0	6	0.0876478	0
25145	OTOA_flip	1-132-3-0-0	6	0.0876478	0
29348	SMARCA4	1-132-3-0-0	6	0.0876478	0
33575	USP27X_flip	1-132-3-0-0	6	0.0876478	0
704	PUM1	1-12-1-0-0	6	0.0983232	0
4972	TLK1	1-12-1-0-0	6	0.0983232	0
10618	LYRM4	1-12-1-0-0	6	0.0983232	0
11746	SEC63	1-12-1-0-0	6	0.0983232	0
28784	ZNF236	1-12-1-0-0	6	0.0983232	0
32932	TNRC6B	1-12-1-0-0	6	0.0983232	0
1098	MAST2	1-12-0-1-0	6	0.135521	0.261181
7418	NCEH1	1-12-0-1-0	6	0.135521	0.261181
17644	RAB11FIP2	1-12-0-1-0	6	0.135521	0.261181
27760	STRADA	1-12-0-1-0	6	0.135521	0.261181
27974	AC011933.2	1-12-0-1-0	6	0.135521	0.261181
33924	WDR44	1-12-0-1-0	6	0.135521	0.261181
1316	MIER1	1-10-0-0-0	6	0.108204	0.376462
4098	GMCL1	1-10-0-0-0	6	0.108204	0.376462
11684	MAP3K7	1-10-0-0-0	6	0.108204	0.376462
21642	XPO4	1-10-0-0-0	6	0.108204	0.376462
31778	RIPOR3	1-10-0-0-0	6	0.108204	0.376462
33980	THOC2	1-10-0-0-0	6	0.108204	0.376462
9326	ELOVL7	1-1-4-0-0	6	0.0660166	0.103698
12764	MPLKIP	1-1-4-0-0	6	0.0660166	0.103698
19930	A2ML1	1-1-4-0-0	6	0.0660166	0.103698
23282	AL133523.1	1-1-4-0-0	6	0.0660166	0.103698
24890	NMRAL1	1-1-4-0-0	6	0.0660166	0.103698
31966	TPD52L2	1-1-4-0-0	6	0.0660166	0.103698
4188	TET3	1-1-0-5-0	6	0.129772	0
6384	U73166.1	1-1-0-5-0	6	0.129772	0
11804	RPF2	1-1-0-5-0	6	0.129772	0
17768	PPP2R2D	1-1-0-5-0	6	0.129772	0
20936	METTL25	1-1-0-5-0	6	0.129772	0
34114	CD99L2	1-1-0-5-0	6	0.129772	0
3442	LINC00298	1-98-3-0-0	5	0.0163967	0.0979097
3560	AC018742.1	1-98-3-0-0	5	0.0163967	0.0979097
5096	AC009962.1	1-98-3-0-0	5	0.0163967	0.0979097
5400	AC012668.3	1-98-3-0-0	5	0.0163967	0.0979097
13842	TMEM176A	1-98-3-0-0	5	0.0163967	0.0979097
11	FAM41C_flip	1-98-1-0-0	5	0.0164662	0.0781837
16245	DOLK_flip	1-98-1-0-0	5	0.0164662	0.0781837
17585	AL136368.1_flip	1-98-1-0-0	5	0.0164662	0.0781837
28745	CCDC102B_flip	1-98-1-0-0	5	0.0164662	0.0781837
33423	AF241728.2_flip	1-98-1-0-0	5	0.0164662	0.0781837
11574	COX7A2	1-97-5-0-0	5	0.141957	1.18885
13750	GSTK1	1-97-5-0-0	5	0.141957	1.18885
24782	ATP6V0C	1-97-5-0-0	5	0.141957	1.18885
26230	TCF25	1-97-5-0-0	5	0.141957	1.18885
33522	RBM3	1-97-5-0-0	5	0.141957	1.18885
988	CCDC30	1-95-7-0-0	5	0.0623415	0.186674
14370	POLB	1-95-7-0-0	5	0.0623415	0.186674
16230	ZER1	1-95-7-0-0	5	0.0623415	0.186674
21578	ULK1	1-95-7-0-0	5	0.0623415	0.186674
32254	PRDM15	1-95-7-0-0	5	0.0623415	0.186674
10380	SFXN1	1-93-0-2-0	5	0.0856423	0.114044
14852	ENY2	1-93-0-2-0	5	0.0856423	0.114044
20046	LOH12CR2	1-93-0-2-0	5	0.0856423	0.114044
20862	CCT2	1-93-0-2-0	5	0.0856423	0.114044
24682	UBE2I	1-93-0-2-0	5	0.0856423	0.114044
2290	CRABP2	1-91-6-0-0	5	0.0468145	0.171404
12934	LINC02604	1-91-6-0-0	5	0.0468145	0.171404
26494	ACADVL	1-91-6-0-0	5	0.0468145	0.171404
28780	LINC00683	1-91-6-0-0	5	0.0468145	0.171404
32732	AL096701.3	1-91-6-0-0	5	0.0468145	0.171404
9922	C5orf15	1-91-1-0-0	5	0.0365441	0.152412
14400	MCM4	1-91-1-0-0	5	0.0365441	0.152412
20458	CSRNP2	1-91-1-0-0	5	0.0365441	0.152412
30392	PVR	1-91-1-0-0	5	0.0365441	0.152412
32108	URB1	1-91-1-0-0	5	0.0365441	0.152412
17866	PHRF1	1-89-5-0-0	5	0.0536931	0.166453
20338	AMIGO2	1-89-5-0-0	5	0.0536931	0.166453
20368	ASB8	1-89-5-0-0	5	0.0536931	0.166453
26514	KCTD11	1-89-5-0-0	5	0.0536931	0.166453
29450	GET3	1-89-5-0-0	5	0.0536931	0.166453
2999	FLVCR1-DT_flip	1-87-6-0-0	5	0.0393632	0.130606
14593	IL7_flip	1-87-6-0-0	5	0.0393632	0.130606
17383	GOLGA7B_flip	1-87-6-0-0	5	0.0393632	0.130606
29657	AC020913.3_flip	1-87-6-0-0	5	0.0393632	0.130606
30375	AC021092.1_flip	1-87-6-0-0	5	0.0393632	0.130606
7758	FAM53A	1-87-5-0-0	5	0.0466107	0.206054
23370	COA8	1-87-5-0-0	5	0.0466107	0.206054
26272	TIMM22	1-87-5-0-0	5	0.0466107	0.206054
29188	MCOLN1	1-87-5-0-0	5	0.0466107	0.206054
30856	LENG1	1-87-5-0-0	5	0.0466107	0.206054
334	CASP9	1-83-7-0-0	5	0.457307	0
1430	C1orf52	1-83-7-0-0	5	0.457307	0
6152	CTNNB1	1-83-7-0-0	5	0.457307	0
11270	CPNE5	1-83-7-0-0	5	0.457307	0
11694	NDUFAF4	1-83-7-0-0	5	0.457307	0
1626	AKNAD1	1-83-3-1-0	5	0.1164	0
5720	ING5	1-83-3-1-0	5	0.1164	0
14398	PRKDC	1-83-3-1-0	5	0.1164	0
32066	LTN1	1-83-3-1-0	5	0.1164	0
32974	ACO2	1-83-3-1-0	5	0.1164	0
2720	ODR4	1-83-0-0-1	5	0.0803139	0.201955
5776	EDEM1	1-83-0-0-1	5	0.0803139	0.201955
7312	LEKR1	1-83-0-0-1	5	0.0803139	0.201955
13210	ZNF655	1-83-0-0-1	5	0.0803139	0.201955
29058	CHAF1A	1-83-0-0-1	5	0.0803139	0.201955
2870	AL512306.3	1-80-10-0-0	5	0.0807467	0
4018	MDH1	1-80-10-0-0	5	0.0807467	0
11390	MRPL2	1-80-10-0-0	5	0.0807467	0
20228	TMTC1	1-80-10-0-0	5	0.0807467	0
34189	UBL4A_flip	1-80-10-0-0	5	0.0807467	0
4974	METTL8	1-8-14-0-0	5	0.0871463	0
6074	LRRFIP2	1-8-14-0-0	5	0.0871463	0
13518	NDUFA5	1-8-14-0-0	5	0.0871463	0
24080	MAP2K1	1-8-14-0-0	5	0.0871463	0
30904	FCAR	1-8-14-0-0	5	0.0871463	0
5216	MOB4	1-8-1-0-0	5	0.122356	0.173788
19244	AP002784.1	1-8-1-0-0	5	0.122356	0.173788
23924	TEX9	1-8-1-0-0	5	0.122356	0.173788
25982	KARS	1-8-1-0-0	5	0.122356	0.173788
27258	AC067852.3	1-8-1-0-0	5	0.122356	0.173788
19462	DSCAML1	1-8-0-2-0	5	0.0675711	0
20834	AC008033.3	1-8-0-2-0	5	0.0675711	0
21545	ZNF664_flip	1-8-0-2-0	5	0.0675711	0
27284	VPS25	1-8-0-2-0	5	0.0675711	0
30051	ZNF146_flip	1-8-0-2-0	5	0.0675711	0
3778	CEBPZ	1-77-2-1-0	5	0.107655	0
6588	SLC25A26	1-77-2-1-0	5	0.107655	0
17626	ABLIM1	1-77-2-1-0	5	0.107655	0
17658	EIF3A	1-77-2-1-0	5	0.107655	0
19792	NDUFA9	1-77-2-1-0	5	0.107655	0
1412	GNG5	1-77-0-2-0	5	0.0920178	0
16772	RAB18	1-77-0-2-0	5	0.0920178	0
16820	ITGB1	1-77-0-2-0	5	0.0920178	0
18124	USP47	1-77-0-2-0	5	0.0920178	0
22076	IPO5	1-77-0-2-0	5	0.0920178	0
175	PHF13_flip	1-73-0-2-0	5	0.0719735	0.123806
1455	AL121989.1_flip	1-73-0-2-0	5	0.0719735	0.123806
12797	LINC00957_flip	1-73-0-2-0	5	0.0719735	0.123806
20903	PHLDA1_flip	1-73-0-2-0	5	0.0719735	0.123806
28951	DOT1L_flip	1-73-0-2-0	5	0.0719735	0.123806
5102	NCKAP1	1-72-2-0-0	5	0.0467114	0.12142
15384	TOPORS	1-72-2-0-0	5	0.0467114	0.12142
16180	NAIF1	1-72-2-0-0	5	0.0467114	0.12142
20068	GPRC5A	1-72-2-0-0	5	0.0467114	0.12142
22118	TEX30	1-72-2-0-0	5	0.0467114	0.12142
2784	MIR181A1HG	1-70-2-0-0	5	0.0829796	0
4954	PPIG	1-70-2-0-0	5	0.0829796	0
15442	DCTN3	1-70-2-0-0	5	0.0829796	0
22604	AL358333.2	1-70-2-0-0	5	0.0829796	0
23332	CINP	1-70-2-0-0	5	0.0829796	0
16956	TFAM	1-7-9-0-0	5	0.0625716	0.0790286
20410	TUBA1C	1-7-9-0-0	5	0.0625716	0.0790286
24194	UBL7-AS1	1-7-9-0-0	5	0.0625716	0.0790286
30014	U2AF1L4	1-7-9-0-0	5	0.0625716	0.0790286
30766	PPP2R1A	1-7-9-0-0	5	0.0625716	0.0790286
680	AL360012.1	1-7-6-1-0	5	0.224045	0
11368	AL035587.2	1-7-6-1-0	5	0.224045	0
16308	PRRC2B	1-7-6-1-0	5	0.224045	0
18624	WDR74	1-7-6-1-0	5	0.224045	0
26126	MAP1LC3B	1-7-6-1-0	5	0.224045	0
2232	AL353807.5	1-7-0-1-0	5	0.109633	0.149832
13846	ATG9B	1-7-0-1-0	5	0.109633	0.149832
14316	LETM2	1-7-0-1-0	5	0.109633	0.149832
19288	ARHGAP42	1-7-0-1-0	5	0.109633	0.149832
25048	NDE1	1-7-0-1-0	5	0.109633	0.149832
177	THAP3_flip	1-69-11-0-0	5	0.0325426	0
11367	C6orf226_flip	1-69-11-0-0	5	0.0325426	0
24322	FAH	1-69-11-0-0	5	0.0325426	0
29248	LINC01862	1-69-11-0-0	5	0.0325426	0
32736	AL096701.4	1-69-11-0-0	5	0.0325426	0
12061	LINC01277_flip	1-64-12-0-0	5	0.0468762	0
14031	FAM167A_flip	1-64-12-0-0	5	0.0468762	0
14962	CASC19	1-64-12-0-0	5	0.0468762	0
16472	NDOR1	1-64-12-0-0	5	0.0468762	0
31400	GINS1	1-64-12-0-0	5	0.0468762	0
1629	GPSM2_flip	1-62-5-0-0	5	0.0741414	0
3922	STON1	1-62-5-0-0	5	0.0741414	0
7901	CPEB2-DT_flip	1-62-5-0-0	5	0.0741414	0
14092	GFRA2	1-62-5-0-0	5	0.0741414	0
30706	SIGLEC7	1-62-5-0-0	5	0.0741414	0
11702	FBXL4	1-59-2-1-0	5	0.103406	0
12688	AVL9	1-59-2-1-0	5	0.103406	0
16288	FUBP3	1-59-2-1-0	5	0.103406	0
25800	DUS2	1-59-2-1-0	5	0.103406	0
28396	GNAL	1-59-2-1-0	5	0.103406	0
62	ATAD3B	1-59-0-2-0	5	0.0525781	0.0576544
22100	PCCA-DT	1-59-0-2-0	5	0.0525781	0.0576544
27400	MAP3K14	1-59-0-2-0	5	0.0525781	0.0576544
31740	CSE1L-AS1	1-59-0-2-0	5	0.0525781	0.0576544
32438	CLTCL1	1-59-0-2-0	5	0.0525781	0.0576544
1240	USP24	1-58-6-0-0	5	0.0916271	0
2828	PPP1R12B	1-58-6-0-0	5	0.0916271	0
9968	SMAD5	1-58-6-0-0	5	0.0916271	0
14392	SPIDR	1-58-6-0-0	5	0.0916271	0
24516	SLCO3A1	1-58-6-0-0	5	0.0916271	0
3454	KIDINS220	1-58-0-8-0	5	0.456236	0
4774	ARHGAP15	1-58-0-8-0	5	0.456236	0
7050	PLXND1	1-58-0-8-0	5	0.456236	0
11620	CYB5R4	1-58-0-8-0	5	0.456236	0
21656	MICU2	1-58-0-8-0	5	0.456236	0
9964	AC026691.1	1-546-1-0-0	5	0.00572256	0
13958	DLGAP2	1-546-1-0-0	5	0.00572256	0
25156	VWA3A	1-546-1-0-0	5	0.00572256	0
26076	ATP2C2	1-546-1-0-0	5	0.00572256	0
31646	SGK2	1-546-1-0-0	5	0.00572256	0
966	CITED4	1-546-0-0-0	5	0.00799411	0
1250	AL035411.3	1-546-0-0-0	5	0.00799411	0
7840	S100P	1-546-0-0-0	5	0.00799411	0
12214	AL360169.2	1-546-0-0-0	5	0.00799411	0
17930	TNNT3	1-546-0-0-0	5	0.00799411	0
1928	NBPF10	1-54-4-0-0	5	0.0944513	0.107001
9340	KIF2A	1-54-4-0-0	5	0.0944513	0.107001
15534	DCAF10	1-54-4-0-0	5	0.0944513	0.107001
18638	RTN3	1-54-4-0-0	5	0.0944513	0.107001
29428	ZNF564	1-54-4-0-0	5	0.0944513	0.107001
12719	EEPD1_flip	1-51-9-0-0	5	0.115583	0
22139	TNFSF13B_flip	1-51-9-0-0	5	0.115583	0
22773	SGPP1_flip	1-51-9-0-0	5	0.115583	0
31727	NCOA3_flip	1-51-9-0-0	5	0.115583	0
33251	PUDP_flip	1-51-9-0-0	5	0.115583	0
2781	PTPRC_flip	1-51-4-0-0	5	0.463435	0.915677
14985	FAM49B_flip	1-51-4-0-0	5	0.463435	0.915677
16045	C5_flip	1-51-4-0-0	5	0.463435	0.915677
22429	G2E3_flip	1-51-4-0-0	5	0.463435	0.915677
25519	LONP2_flip	1-51-4-0-0	5	0.463435	0.915677
3148	GUK1	1-51-2-0-0	5	0.175783	0.300617
10536	RACK1	1-51-2-0-0	5	0.175783	0.300617
11232	RPL10A	1-51-2-0-0	5	0.175783	0.300617
24360	RPS17	1-51-2-0-0	5	0.175783	0.300617
29454	JUNB	1-51-2-0-0	5	0.175783	0.300617
4653	RALB_flip	1-51-12-0-0	5	0.450931	0
10932	HLA-A	1-51-12-0-0	5	0.450931	0
11002	HLA-B	1-51-12-0-0	5	0.450931	0
11056	VARS	1-51-12-0-0	5	0.450931	0
23123	GALC_flip	1-51-12-0-0	5	0.450931	0
119	TNFRSF14_flip	1-50-9-0-0	5	0.165061	0
4788	GTDC1	1-50-9-0-0	5	0.165061	0
13661	AC009542.1_flip	1-50-9-0-0	5	0.165061	0
20416	SPATS2	1-50-9-0-0	5	0.165061	0
30443	VASP_flip	1-50-9-0-0	5	0.165061	0
4196	MOB1A	1-50-7-0-0	5	0.115235	0
6766	CD47	1-50-7-0-0	5	0.115235	0
7194	U2SURP	1-50-7-0-0	5	0.115235	0
9434	TNPO1	1-50-7-0-0	5	0.115235	0
25972	TMEM170A	1-50-7-0-0	5	0.115235	0
2038	ARNT	1-5-9-0-0	5	0.0914025	0.257871
11860	GOPC	1-5-9-0-0	5	0.0914025	0.257871
12808	NUDCD3	1-5-9-0-0	5	0.0914025	0.257871
30094	ZNF383	1-5-9-0-0	5	0.0914025	0.257871
33122	C22orf34	1-5-9-0-0	5	0.0914025	0.257871
15704	CKS2	1-5-5-1-0	5	0.0812826	0
20250	AMN1	1-5-5-1-0	5	0.0812826	0
24796	ERVK13-1	1-5-5-1-0	5	0.0812826	0
28966	SPPL2B	1-5-5-1-0	5	0.0812826	0
32404	BCL2L13	1-5-5-1-0	5	0.0812826	0
270	MTOR	1-5-0-1-0	5	0.109099	0.146028
1080	TESK2	1-5-0-1-0	5	0.109099	0.146028
8918	WWC2	1-5-0-1-0	5	0.109099	0.146028
19254	PIWIL4	1-5-0-1-0	5	0.109099	0.146028
[truncated: 1,288 more rows]

## Sheet: filtered_Plasmacytoid_DC
	gene	clustering results	the numbers of genes	The cohesion of the last layer	The separation of the last layer
659	SH3D21_flip	1-365-0-0-0	14	0.0383017	0
3209	AC015982.2_flip	1-365-0-0-0	14	0.0383017	0
4793	AC018809.2_flip	1-365-0-0-0	14	0.0383017	0
6133	ECT2_flip	1-365-0-0-0	14	0.0383017	0
7067	LEF1_flip	1-365-0-0-0	14	0.0383017	0
10849	AC002456.1_flip	1-365-0-0-0	14	0.0383017	0
12717	NPR2_flip	1-365-0-0-0	14	0.0383017	0
13885	ASAH2_flip	1-365-0-0-0	14	0.0383017	0
15553	CCND1_flip	1-365-0-0-0	14	0.0383017	0
16215	FKBP4_flip	1-365-0-0-0	14	0.0383017	0
16595	AC023157.3_flip	1-365-0-0-0	14	0.0383017	0
19247	APBA2_flip	1-365-0-0-0	14	0.0383017	0
22807	FDXR_flip	1-365-0-0-0	14	0.0383017	0
26065	PPP1R3D_flip	1-365-0-0-0	14	0.0383017	0
830	BTBD19	1-58-2-0-0	10	0.0662247	0.191254
10892	SGCE	1-58-2-0-0	10	0.0662247	0.191254
12556	MLANA	1-58-2-0-0	10	0.0662247	0.191254
15296	SPINDOC	1-58-2-0-0	10	0.0662247	0.191254
21724	LINC00324	1-58-2-0-0	10	0.0662247	0.191254
22992	CEP131	1-58-2-0-0	10	0.0662247	0.191254
23134	AP005329.1	1-58-2-0-0	10	0.0662247	0.191254
23794	AC104532.2	1-58-2-0-0	10	0.0662247	0.191254
24560	LINC01534	1-58-2-0-0	10	0.0662247	0.191254
26776	LGALS2	1-58-2-0-0	10	0.0662247	0.191254
796	KDM4A	1-39-0-0-0	10	0.136065	0.331473
2672	CHML	1-39-0-0-0	10	0.136065	0.331473
3026	AL133243.3	1-39-0-0-0	10	0.136065	0.331473
4110	OLA1	1-39-0-0-0	10	0.136065	0.331473
4664	HDAC4	1-39-0-0-0	10	0.136065	0.331473
5562	ALCAM	1-39-0-0-0	10	0.136065	0.331473
8992	AL358933.1	1-39-0-0-0	10	0.136065	0.331473
10480	NT5C3A	1-39-0-0-0	10	0.136065	0.331473
13034	NIPSNAP3A	1-39-0-0-0	10	0.136065	0.331473
25168	ZNF347	1-39-0-0-0	10	0.136065	0.331473
2921	CENPA_flip	1-123-0-0-0	10	0.122816	0
4681	CAPN10_flip	1-123-0-0-0	10	0.122816	0
7549	TARS_flip	1-123-0-0-0	10	0.122816	0
14791	ILK_flip	1-123-0-0-0	10	0.122816	0
15109	KBTBD4_flip	1-123-0-0-0	10	0.122816	0
15509	TMEM134_flip	1-123-0-0-0	10	0.122816	0
22949	CEP295NL_flip	1-123-0-0-0	10	0.122816	0
25007	CD37_flip	1-123-0-0-0	10	0.122816	0
25649	ACSS1_flip	1-123-0-0-0	10	0.122816	0
26655	NIPSNAP1_flip	1-123-0-0-0	10	0.122816	0
5068	AC006059.1	1-12-0-0-0	10	0.0962563	0.240989
5130	CCR2	1-12-0-0-0	10	0.0962563	0.240989
6780	REST	1-12-0-0-0	10	0.0962563	0.240989
9228	DAXX	1-12-0-0-0	10	0.0962563	0.240989
14640	BET1L	1-12-0-0-0	10	0.0962563	0.240989
20360	ZNF263	1-12-0-0-0	10	0.0962563	0.240989
21008	SETD6	1-12-0-0-0	10	0.0962563	0.240989
21370	ZNF469	1-12-0-0-0	10	0.0962563	0.240989
23592	FAM174C	1-12-0-0-0	10	0.0962563	0.240989
26862	TAB1	1-12-0-0-0	10	0.0962563	0.240989
1608	C1orf54	1-112-1-0-0	10	0.114138	0.268077
3158	EPCAM-DT	1-112-1-0-0	10	0.114138	0.268077
3204	CFAP36	1-112-1-0-0	10	0.114138	0.268077
5628	CCDC191	1-112-1-0-0	10	0.114138	0.268077
10898	PON2	1-112-1-0-0	10	0.114138	0.268077
12058	ZFAND1	1-112-1-0-0	10	0.114138	0.268077
14784	TIMM10B	1-112-1-0-0	10	0.114138	0.268077
19894	FBXO22	1-112-1-0-0	10	0.114138	0.268077
22188	STARD3	1-112-1-0-0	10	0.114138	0.268077
25436	TBC1D20	1-112-1-0-0	10	0.114138	0.268077
3940	ACVR2A	1-99-0-0-0	9	0.14597	0.194742
9342	OARD1	1-99-0-0-0	9	0.14597	0.194742
11732	AC108449.1	1-99-0-0-0	9	0.14597	0.194742
11760	UBXN8	1-99-0-0-0	9	0.14597	0.194742
13344	SH3GLB2	1-99-0-0-0	9	0.14597	0.194742
19082	AL139020.1	1-99-0-0-0	9	0.14597	0.194742
19480	CASC4	1-99-0-0-0	9	0.14597	0.194742
26250	PAXBP1-AS1	1-99-0-0-0	9	0.14597	0.194742
27126	PRKX	1-99-0-0-0	9	0.14597	0.194742
1486	WARS2-AS1	1-67-0-0-0	9	0.12605	0.470617
5176	SHISA5	1-67-0-0-0	9	0.12605	0.470617
8312	NDUFA2	1-67-0-0-0	9	0.12605	0.470617
11186	LSM8	1-67-0-0-0	9	0.12605	0.470617
11366	ADCK2	1-67-0-0-0	9	0.12605	0.470617
14706	TOLLIP	1-67-0-0-0	9	0.12605	0.470617
18072	MYCBP2-AS1	1-67-0-0-0	9	0.12605	0.470617
18694	ESR2	1-67-0-0-0	9	0.12605	0.470617
27236	PRDX4	1-67-0-0-0	9	0.12605	0.470617
3974	ARL6IP6	1-305-0-0-0	9	0.114334	0.153869
5636	TIGIT	1-305-0-0-0	9	0.114334	0.153869
7464	TRIP13	1-305-0-0-0	9	0.114334	0.153869
9944	GVQW2	1-305-0-0-0	9	0.114334	0.153869
12642	BAG1	1-305-0-0-0	9	0.114334	0.153869
18006	DHRS12	1-305-0-0-0	9	0.114334	0.153869
19284	AC010809.1	1-305-0-0-0	9	0.114334	0.153869
21318	CRISPLD2	1-305-0-0-0	9	0.114334	0.153869
25292	LINC01864	1-305-0-0-0	9	0.114334	0.153869
3975	ARL6IP6_flip	1-302-0-0-0	9	0.114334	0.153869
5637	TIGIT_flip	1-302-0-0-0	9	0.114334	0.153869
7465	TRIP13_flip	1-302-0-0-0	9	0.114334	0.153869
9945	GVQW2_flip	1-302-0-0-0	9	0.114334	0.153869
12643	BAG1_flip	1-302-0-0-0	9	0.114334	0.153869
18007	DHRS12_flip	1-302-0-0-0	9	0.114334	0.153869
19285	AC010809.1_flip	1-302-0-0-0	9	0.114334	0.153869
21319	CRISPLD2_flip	1-302-0-0-0	9	0.114334	0.153869
25293	LINC01864_flip	1-302-0-0-0	9	0.114334	0.153869
1365	LAMTOR5-AS1_flip	1-25-0-0-0	9	0.138461	0.307738
11455	GIMAP8_flip	1-25-0-0-0	9	0.138461	0.307738
14759	STIM1_flip	1-25-0-0-0	9	0.138461	0.307738
14861	CTR9_flip	1-25-0-0-0	9	0.138461	0.307738
18975	GPR65_flip	1-25-0-0-0	9	0.138461	0.307738
19747	SLC24A1_flip	1-25-0-0-0	9	0.138461	0.307738
24407	ZNF493_flip	1-25-0-0-0	9	0.138461	0.307738
24695	ZNF780A_flip	1-25-0-0-0	9	0.138461	0.307738
26933	WBP2NL_flip	1-25-0-0-0	9	0.138461	0.307738
1008	TM2D1	1-124-1-0-0	9	0.135994	0.201569
3116	THADA	1-124-1-0-0	9	0.135994	0.201569
6366	DLG1	1-124-1-0-0	9	0.135994	0.201569
17946	AL157369.1	1-124-1-0-0	9	0.135994	0.201569
19426	GANC	1-124-1-0-0	9	0.135994	0.201569
21602	RABEP1	1-124-1-0-0	9	0.135994	0.201569
25146	ZNF808	1-124-1-0-0	9	0.135994	0.201569
25528	SHLD1	1-124-1-0-0	9	0.135994	0.201569
27912	TMLHE-AS1	1-124-1-0-0	9	0.135994	0.201569
2014	TIPRL	1-81-0-0-0	8	0.113727	0.24622
5220	NICN1	1-81-0-0-0	8	0.113727	0.24622
10460	NOD1	1-81-0-0-0	8	0.113727	0.24622
10562	AC004951.1	1-81-0-0-0	8	0.113727	0.24622
18386	RIPK3	1-81-0-0-0	8	0.113727	0.24622
21400	ACSF3	1-81-0-0-0	8	0.113727	0.24622
24384	ZNF486	1-81-0-0-0	8	0.113727	0.24622
24630	AC008649.1	1-81-0-0-0	8	0.113727	0.24622
166	CTNNBIP1	1-58-1-0-0	8	0.0714384	0.176527
5830	AC055733.2	1-58-1-0-0	8	0.0714384	0.176527
6170	DNAJC19	1-58-1-0-0	8	0.0714384	0.176527
14726	C11orf21	1-58-1-0-0	8	0.0714384	0.176527
24252	MVB12A	1-58-1-0-0	8	0.0714384	0.176527
24722	RAB4B	1-58-1-0-0	8	0.0714384	0.176527
26086	LAMA5	1-58-1-0-0	8	0.0714384	0.176527
27138	AC079142.1	1-58-1-0-0	8	0.0714384	0.176527
1574	NBPF14	1-248-1-0-0	8	0.155848	0.173912
5652	B4GALT4	1-248-1-0-0	8	0.155848	0.173912
9286	SRPK1	1-248-1-0-0	8	0.155848	0.173912
10756	HIP1	1-248-1-0-0	8	0.155848	0.173912
13118	AKNA	1-248-1-0-0	8	0.155848	0.173912
22504	ACSF2	1-248-1-0-0	8	0.155848	0.173912
26708	PISD	1-248-1-0-0	8	0.155848	0.173912
27140	TBL1X	1-248-1-0-0	8	0.155848	0.173912
3438	CCDC142	1-18-3-0-0	8	0.171384	0.581649
5722	DTX3L	1-18-3-0-0	8	0.171384	0.581649
5958	PLSCR1	1-18-3-0-0	8	0.171384	0.581649
13818	CSGALNACT2	1-18-3-0-0	8	0.171384	0.581649
17018	TBK1	1-18-3-0-0	8	0.171384	0.581649
19786	FEM1B	1-18-3-0-0	8	0.171384	0.581649
23598	DAZAP1	1-18-3-0-0	8	0.171384	0.581649
26542	UBE2L3	1-18-3-0-0	8	0.171384	0.581649
5285	RAD54L2_flip	1-159-0-0-0	8	0.107401	0.294557
7795	SMN1_flip	1-159-0-0-0	8	0.107401	0.294557
12363	TMEM71_flip	1-159-0-0-0	8	0.107401	0.294557
13637	CDC123_flip	1-159-0-0-0	8	0.107401	0.294557
17441	OAS2_flip	1-159-0-0-0	8	0.107401	0.294557
19757	DIS3L_flip	1-159-0-0-0	8	0.107401	0.294557
22483	SLC35B1_flip	1-159-0-0-0	8	0.107401	0.294557
27069	NCAPH2_flip	1-159-0-0-0	8	0.107401	0.294557
5284	RAD54L2	1-158-0-0-0	8	0.107401	0.294557
7794	SMN1	1-158-0-0-0	8	0.107401	0.294557
12362	TMEM71	1-158-0-0-0	8	0.107401	0.294557
13636	CDC123	1-158-0-0-0	8	0.107401	0.294557
17440	OAS2	1-158-0-0-0	8	0.107401	0.294557
19756	DIS3L	1-158-0-0-0	8	0.107401	0.294557
22482	SLC35B1	1-158-0-0-0	8	0.107401	0.294557
27068	NCAPH2	1-158-0-0-0	8	0.107401	0.294557
412	RHD	1-131-0-0-0	8	0.122449	0.255952
1232	MTF2	1-131-0-0-0	8	0.122449	0.255952
1540	POLR3GL	1-131-0-0-0	8	0.122449	0.255952
5620	USF3	1-131-0-0-0	8	0.122449	0.255952
13028	ZNF189	1-131-0-0-0	8	0.122449	0.255952
15174	MRPL16	1-131-0-0-0	8	0.122449	0.255952
16892	PA2G4	1-131-0-0-0	8	0.122449	0.255952
19310	ZNF770	1-131-0-0-0	8	0.122449	0.255952
5129	CCR1_flip	1-85-5-0-0	7	0.092078	0
5967	COMMD2_flip	1-85-5-0-0	7	0.092078	0
6309	XXYLT1-AS2_flip	1-85-5-0-0	7	0.092078	0
15721	DLG2_flip	1-85-5-0-0	7	0.092078	0
17633	DNAH10_flip	1-85-5-0-0	7	0.092078	0
20794	ZNF768	1-85-5-0-0	7	0.092078	0
26304	CBR3	1-85-5-0-0	7	0.092078	0
230	VPS13D	1-48-4-0-0	7	0.43239	0
3015	SLC30A6_flip	1-48-4-0-0	7	0.43239	0
4450	SMARCAL1	1-48-4-0-0	7	0.43239	0
7572	NIPBL	1-48-4-0-0	7	0.43239	0
8137	PRRC1_flip	1-48-4-0-0	7	0.43239	0
22909	MFSD11_flip	1-48-4-0-0	7	0.43239	0
27956	EIF1AY	1-48-4-0-0	7	0.43239	0
5275	LINC02019_flip	1-4-6-0-0	7	0.18226	0
5542	PCNP	1-4-6-0-0	7	0.18226	0
8593	RGS14_flip	1-4-6-0-0	7	0.18226	0
16246	NDUFA9	1-4-6-0-0	7	0.18226	0
17173	LINC02397_flip	1-4-6-0-0	7	0.18226	0
18716	AL139022.1	1-4-6-0-0	7	0.18226	0
19964	AC027808.2	1-4-6-0-0	7	0.18226	0
1100	MSH4	1-4-1-0-0	7	0.186158	0
7674	DHX29	1-4-1-0-0	7	0.186158	0
9984	LTV1	1-4-1-0-0	7	0.186158	0
13910	ANK3	1-4-1-0-0	7	0.186158	0
13920	JMJD1C	1-4-1-0-0	7	0.186158	0
26242	URB1	1-4-1-0-0	7	0.186158	0
27331	TIMP1_flip	1-4-1-0-0	7	0.186158	0
1782	CLK2	1-362-0-0-0	7	0.0773006	0.369955
2380	UTP25	1-362-0-0-0	7	0.0773006	0.369955
9010	TRIM27	1-362-0-0-0	7	0.0773006	0.369955
12402	AC040970.1	1-362-0-0-0	7	0.0773006	0.369955
15468	DPP3	1-362-0-0-0	7	0.0773006	0.369955
20160	LINS1	1-362-0-0-0	7	0.0773006	0.369955
23584	STK11	1-362-0-0-0	7	0.0773006	0.369955
2058	EEF1AKNMT	1-256-0-0-0	7	0.0362553	0
10436	AC005162.3	1-256-0-0-0	7	0.0362553	0
10950	CYP3A5	1-256-0-0-0	7	0.0362553	0
12336	LINC00861	1-256-0-0-0	7	0.0362553	0
19110	DEGS2	1-256-0-0-0	7	0.0362553	0
20660	KDM8	1-256-0-0-0	7	0.0362553	0
25656	GINS1	1-256-0-0-0	7	0.0362553	0
826	RPS8	1-25-5-0-0	7	0.219517	0.648952
7912	RPS23	1-25-5-0-0	7	0.219517	0.648952
14776	SMPD1	1-25-5-0-0	7	0.219517	0.648952
23600	RPS15	1-25-5-0-0	7	0.219517	0.648952
23646	OAZ1	1-25-5-0-0	7	0.219517	0.648952
23722	EEF2	1-25-5-0-0	7	0.219517	0.648952
24676	RPS16	1-25-5-0-0	7	0.219517	0.648952
8362	PRELID2	1-226-0-0-0	7	0.120553	0.258169
9718	SNX3	1-226-0-0-0	7	0.120553	0.258169
11320	AC009542.1	1-226-0-0-0	7	0.120553	0.258169
14742	SLC22A18	1-226-0-0-0	7	0.120553	0.258169
16596	LINC02422	1-226-0-0-0	7	0.120553	0.258169
19366	CCDC32	1-226-0-0-0	7	0.120553	0.258169
24862	ERCC2	1-226-0-0-0	7	0.120553	0.258169
262	EPHA2	1-20-0-0-0	7	0.0695002	0.270664
4170	LINC01934	1-20-0-0-0	7	0.0695002	0.270664
4336	STRADB	1-20-0-0-0	7	0.0695002	0.270664
10248	BRAT1	1-20-0-0-0	7	0.0695002	0.270664
17292	AC089985.1	1-20-0-0-0	7	0.0695002	0.270664
21594	ZFP3	1-20-0-0-0	7	0.0695002	0.270664
22526	NME2	1-20-0-0-0	7	0.0695002	0.270664
1664	PI4KB	1-194-0-0-0	7	0.103838	0.205417
2940	MPV17	1-194-0-0-0	7	0.103838	0.205417
9200	HLA-DOA	1-194-0-0-0	7	0.103838	0.205417
14226	ALDH18A1	1-194-0-0-0	7	0.103838	0.205417
21608	RPAIN	1-194-0-0-0	7	0.103838	0.205417
23982	TIMM29	1-194-0-0-0	7	0.103838	0.205417
24822	ZNF225	1-194-0-0-0	7	0.103838	0.205417
1732	C1orf43	1-170-0-0-0	7	0.150508	0.221289
6862	CCNI	1-170-0-0-0	7	0.150508	0.221289
10582	OGDH	1-170-0-0-0	7	0.150508	0.221289
15890	POU2AF1	1-170-0-0-0	7	0.150508	0.221289
17054	MDM1	1-170-0-0-0	7	0.150508	0.221289
19206	CRIP1	1-170-0-0-0	7	0.150508	0.221289
26038	RAB22A	1-170-0-0-0	7	0.150508	0.221289
6756	SRD5A3	1-161-0-0-0	7	0.123482	0.21648
8258	HSPA9	1-161-0-0-0	7	0.123482	0.21648
9576	HMGN3	1-161-0-0-0	7	0.123482	0.21648
15568	AP002495.1	1-161-0-0-0	7	0.123482	0.21648
18448	PPP2R3C	1-161-0-0-0	7	0.123482	0.21648
19074	GLRX5	1-161-0-0-0	7	0.123482	0.21648
25940	SULF2	1-161-0-0-0	7	0.123482	0.21648
15880	DDX10	1-94-2-0-0	6	0.147185	1.41526
22242	DNAJC7	1-94-2-0-0	6	0.147185	1.41526
25684	PLAGL2	1-94-2-0-0	6	0.147185	1.41526
25836	RALGAPB	1-94-2-0-0	6	0.147185	1.41526
26804	PICK1	1-94-2-0-0	6	0.147185	1.41526
26844	APOBEC3D	1-94-2-0-0	6	0.147185	1.41526
10994	TSC22D4	1-93-1-1-0	6	0.0908324	0.112339
14620	TUBGCP2	1-93-1-1-0	6	0.0908324	0.112339
16244	DYRK4	1-93-1-1-0	6	0.0908324	0.112339
24662	LRFN1	1-93-1-1-0	6	0.0908324	0.112339
26416	SUMO3	1-93-1-1-0	6	0.0908324	0.112339
26638	CCDC117	1-93-1-1-0	6	0.0908324	0.112339
5046	RPL14	1-93-0-0-1	6	0.129409	0.431125
8404	RPS14	1-93-0-0-1	6	0.129409	0.431125
11912	RPS20	1-93-0-0-1	6	0.129409	0.431125
12168	RPL30	1-93-0-0-1	6	0.129409	0.431125
19994	RPS17	1-93-0-0-1	6	0.129409	0.431125
27864	RPL10	1-93-0-0-1	6	0.129409	0.431125
4474	CTDSP1	1-88-1-0-0	6	0.133468	0
8648	CANX	1-88-1-0-0	6	0.133468	0
13406	DDX31	1-88-1-0-0	6	0.133468	0
14676	DEAF1	1-88-1-0-0	6	0.133468	0
22612	PTRH2	1-88-1-0-0	6	0.133468	0
23290	GAREM1	1-88-1-0-0	6	0.133468	0
5407	PTPRG_flip	1-87-0-0-0	6	0.536212	0
5883	STAG1_flip	1-87-0-0-0	6	0.536212	0
6277	AC073365.1_flip	1-87-0-0-0	6	0.536212	0
14930	ZDHHC13	1-87-0-0-0	6	0.536212	0
17190	AC012085.2	1-87-0-0-0	6	0.536212	0
27487	SNX12_flip	1-87-0-0-0	6	0.536212	0
6246	DNAJB11	1-78-4-0-0	6	0.162956	0
7987	AC008906.1_flip	1-78-4-0-0	6	0.162956	0
11564	AGPAT5	1-78-4-0-0	6	0.162956	0
17209	FGD6_flip	1-78-4-0-0	6	0.162956	0
24068	HOOK2	1-78-4-0-0	6	0.162956	0
27323	CDK16_flip	1-78-4-0-0	6	0.162956	0
3598	ANKRD36B	1-59-0-0-0	6	0.149648	0.354879
5582	CIP2A	1-59-0-0-0	6	0.149648	0.354879
6612	PI4K2B	1-59-0-0-0	6	0.149648	0.354879
11178	CAPZA2	1-59-0-0-0	6	0.149648	0.354879
15584	INPPL1	1-59-0-0-0	6	0.149648	0.354879
19336	GPR176	1-59-0-0-0	6	0.149648	0.354879
2982	AC092164.1	1-57-2-0-0	6	0.129786	0
7885	SERINC5_flip	1-57-2-0-0	6	0.129786	0
12540	RCL1	1-57-2-0-0	6	0.129786	0
18601	AL158801.3_flip	1-57-2-0-0	6	0.129786	0
19396	OIP5	1-57-2-0-0	6	0.129786	0
26868	RPS19BP1	1-57-2-0-0	6	0.129786	0
526	TAF12	1-51-2-0-0	6	0.0905842	0.203496
6166	CCDC39	1-51-2-0-0	6	0.0905842	0.203496
8998	ZKSCAN4	1-51-2-0-0	6	0.0905842	0.203496
11264	CEP41	1-51-2-0-0	6	0.0905842	0.203496
13202	PSMB7	1-51-2-0-0	6	0.0905842	0.203496
26144	PRPF6	1-51-2-0-0	6	0.0905842	0.203496
2460	AIDA	1-51-0-0-0	6	0.119573	0.26576
4572	SP140L	1-51-0-0-0	6	0.119573	0.26576
6370	AC024560.4	1-51-0-0-0	6	0.119573	0.26576
10800	PHTF2	1-51-0-0-0	6	0.119573	0.26576
11012	TRIM56	1-51-0-0-0	6	0.119573	0.26576
25150	ZNF83	1-51-0-0-0	6	0.119573	0.26576
8734	PRPF4B	1-48-6-0-0	6	0.13471	0
11704	TRIM35	1-48-6-0-0	6	0.13471	0
12352	AC131568.1	1-48-6-0-0	6	0.13471	0
15396	MALAT1	1-48-6-0-0	6	0.13471	0
16100	AP000866.6	1-48-6-0-0	6	0.13471	0
26222	USP16	1-48-6-0-0	6	0.13471	0
54	MIB2	1-48-0-1-0	6	0.144693	0.278178
1058	SLC35D1	1-48-0-1-0	6	0.144693	0.278178
8018	PPIP5K2	1-48-0-1-0	6	0.144693	0.278178
21170	DDX19A	1-48-0-1-0	6	0.144693	0.278178
23328	LINC00907	1-48-0-1-0	6	0.144693	0.278178
26698	PIK3IP1-AS1	1-48-0-1-0	6	0.144693	0.278178
1944	AL592295.5	1-39-3-0-0	6	0.139132	0.412898
2700	EFCAB2	1-39-3-0-0	6	0.139132	0.412898
3038	CRIM1	1-39-3-0-0	6	0.139132	0.412898
4168	UBE2E3	1-39-3-0-0	6	0.139132	0.412898
5442	FRMD4B	1-39-3-0-0	6	0.139132	0.412898
16082	GRAMD1B	1-39-3-0-0	6	0.139132	0.412898
3840	SAP130	1-39-1-0-0	6	0.18555	0.326839
5438	UBA3	1-39-1-0-0	6	0.18555	0.326839
7510	OTULINL	1-39-1-0-0	6	0.18555	0.326839
16622	KIF21A	1-39-1-0-0	6	0.18555	0.326839
18524	SOS2	1-39-1-0-0	6	0.18555	0.326839
21412	SPG7	1-39-1-0-0	6	0.18555	0.326839
1830	TMEM79	1-364-1-0-0	6	0.0251316	0.0436704
10848	AC002456.1	1-364-1-0-0	6	0.0251316	0.0436704
12022	HNF4G	1-364-1-0-0	6	0.0251316	0.0436704
15382	AP000944.7	1-364-1-0-0	6	0.0251316	0.0436704
22806	FDXR	1-364-1-0-0	6	0.0251316	0.0436704
26476	DGCR6	1-364-1-0-0	6	0.0251316	0.0436704
3062	AC006369.1	1-297-0-0-0	6	0.172689	0.365399
8846	MYLIP	1-297-0-0-0	6	0.172689	0.365399
10346	BZW2	1-297-0-0-0	6	0.172689	0.365399
15668	AP003680.1	1-297-0-0-0	6	0.172689	0.365399
15896	ALG9	1-297-0-0-0	6	0.172689	0.365399
20458	AC007220.1	1-297-0-0-0	6	0.172689	0.365399
1932	B4GALT3	1-289-2-0-0	6	0.0982594	0
3612	COA5	1-289-2-0-0	6	0.0982594	0
7798	GTF2H2	1-289-2-0-0	6	0.0982594	0
9058	FLOT1	1-289-2-0-0	6	0.0982594	0
14254	FRAT2	1-289-2-0-0	6	0.0982594	0
15260	HNRNPUL2	1-289-2-0-0	6	0.0982594	0
938	SHISAL2A	1-280-1-0-0	6	0.124865	0.132411
2034	SELL	1-280-1-0-0	6	0.124865	0.132411
8192	VDAC1	1-280-1-0-0	6	0.124865	0.132411
8584	RAB24	1-280-1-0-0	6	0.124865	0.132411
10268	RBAK	1-280-1-0-0	6	0.124865	0.132411
17998	SERPINE3	1-280-1-0-0	6	0.124865	0.132411
210	MAD2L2	1-272-1-0-0	6	0.13186	0
7576	NUP155	1-272-1-0-0	6	0.13186	0
14222	PDLIM1	1-272-1-0-0	6	0.13186	0
19106	EVL	1-272-1-0-0	6	0.13186	0
25018	FCGRT	1-272-1-0-0	6	0.13186	0
27038	ALG12	1-272-1-0-0	6	0.13186	0
7782	TAF9	1-270-0-0-0	6	0.170875	0
10302	ZDHHC4	1-270-0-0-0	6	0.170875	0
11416	PDIA4	1-270-0-0-0	6	0.170875	0
16112	EI24	1-270-0-0-0	6	0.170875	0
16640	PPHLN1	1-270-0-0-0	6	0.170875	0
26918	XRCC6	1-270-0-0-0	6	0.170875	0
10206	AC147651.4	1-26-7-0-0	6	0.171722	0
11190	CPED1	1-26-7-0-0	6	0.171722	0
12118	AC117834.1	1-26-7-0-0	6	0.171722	0
17574	MLXIP	1-26-7-0-0	6	0.171722	0
23488	CNDP2	1-26-7-0-0	6	0.171722	0
24912	ARHGAP35	1-26-7-0-0	6	0.171722	0
9136	EHMT2	1-250-0-0-0	6	0.0788869	0.163747
12434	NAPRT	1-250-0-0-0	6	0.0788869	0.163747
15976	TMPRSS13	1-250-0-0-0	6	0.0788869	0.163747
19200	PACS2	1-250-0-0-0	6	0.0788869	0.163747
20852	PYCARD	1-250-0-0-0	6	0.0788869	0.163747
25500	CDC25B	1-250-0-0-0	6	0.0788869	0.163747
5204	QARS	1-245-0-0-0	6	0.181216	0.29675
8170	IRF1	1-245-0-0-0	6	0.181216	0.29675
11930	LINC01301	1-245-0-0-0	6	0.181216	0.29675
13904	TFAM	1-245-0-0-0	6	0.181216	0.29675
23772	PTPRS	1-245-0-0-0	6	0.181216	0.29675
27940	DDX3Y	1-245-0-0-0	6	0.181216	0.29675
2428	CENPF	1-238-0-1-0	6	0.139091	0
15984	MPZL3	1-238-0-1-0	6	0.139091	0
18898	TGFB3	1-238-0-1-0	6	0.139091	0
20035	PDE8A_flip	1-238-0-1-0	6	0.139091	0
20341	FLYWCH1_flip	1-238-0-1-0	6	0.139091	0
27594	ARMCX5	1-238-0-1-0	6	0.139091	0
9108	GPANK1	1-210-0-0-0	6	0.115381	0
13376	FUBP3	1-210-0-0-0	6	0.115381	0
18654	JKAMP	1-210-0-0-0	6	0.115381	0
24036	ZNF136	1-210-0-0-0	6	0.115381	0
24238	DDA1	1-210-0-0-0	6	0.115381	0
26996	FAM118A	1-210-0-0-0	6	0.115381	0
688	SF3A3	1-208-1-0-0	6	0.13439	0
1922	NIT1	1-208-1-0-0	6	0.13439	0
13914	ARID5B	1-208-1-0-0	6	0.13439	0
17252	UTP20	1-208-1-0-0	6	0.13439	0
24958	EMP3	1-208-1-0-0	6	0.13439	0
26054	ATP5F1E	1-208-1-0-0	6	0.13439	0
4781	ARPC4_flip	1-2-0-0-0	6	0.143798	0.432747
9433	MAD2L1BP_flip	1-2-0-0-0	6	0.143798	0.432747
22345	SLC25A39_flip	1-2-0-0-0	6	0.143798	0.432747
22903	JMJD6_flip	1-2-0-0-0	6	0.143798	0.432747
22927	SYNGR2_flip	1-2-0-0-0	6	0.143798	0.432747
24331	COPE_flip	1-2-0-0-0	6	0.143798	0.432747
2334	NUCKS1	1-197-0-1-0	6	0.0820016	0.208768
5812	IFT122	1-197-0-1-0	6	0.0820016	0.208768
8020	C5orf30	1-197-0-1-0	6	0.0820016	0.208768
16800	AC025259.1	1-197-0-1-0	6	0.0820016	0.208768
17846	EXOSC8	1-197-0-1-0	6	0.0820016	0.208768
24146	DNAJB1	1-197-0-1-0	6	0.0820016	0.208768
3891	UBXN4_flip	1-182-0-1-0	6	0.133902	0.196431
9195	HLA-DMB_flip	1-182-0-1-0	6	0.133902	0.196431
11449	ZNF775_flip	1-182-0-1-0	6	0.133902	0.196431
13529	NRARP_flip	1-182-0-1-0	6	0.133902	0.196431
22213	WIPF2_flip	1-182-0-1-0	6	0.133902	0.196431
26613	ASPHD2_flip	1-182-0-1-0	6	0.133902	0.196431
152	SPSB1	1-176-2-0-0	6	0.239213	0
4990	LRRFIP2	1-176-2-0-0	6	0.239213	0
6089	WDR49_flip	1-176-2-0-0	6	0.239213	0
14146	ATAD1	1-176-2-0-0	6	0.239213	0
22102	SLFN5	1-176-2-0-0	6	0.239213	0
27354	WDR13	1-176-2-0-0	6	0.239213	0
704	MACF1	1-172-3-0-0	6	0.166753	0
13269	ENG_flip	1-172-3-0-0	6	0.166753	0
14506	DENND10	1-172-3-0-0	6	0.166753	0
16533	AC022509.2_flip	1-172-3-0-0	6	0.166753	0
20856	ITGAX	1-172-3-0-0	6	0.166753	0
24152	CLEC17A	1-172-3-0-0	6	0.166753	0
7600	RPL37	1-169-2-0-0	6	0.144832	0
13484	PHPT1	1-169-2-0-0	6	0.144832	0
15266	TAF6L	1-169-2-0-0	6	0.144832	0
24224	AC020913.1	1-169-2-0-0	6	0.144832	0
24300	JUND	1-169-2-0-0	6	0.144832	0
26388	RRP1	1-169-2-0-0	6	0.144832	0
2659	MTR_flip	1-162-3-0-0	6	0.175077	0
4377	EEF1B2_flip	1-162-3-0-0	6	0.175077	0
14057	NDST2_flip	1-162-3-0-0	6	0.175077	0
16859	HNRNPA1_flip	1-162-3-0-0	6	0.175077	0
17215	SNRPF_flip	1-162-3-0-0	6	0.175077	0
21587	ENO3_flip	1-162-3-0-0	6	0.175077	0
1154	C1orf52	1-150-0-0-0	6	0.121772	0.414221
7728	DIMT1	1-150-0-0-0	6	0.121772	0.414221
8348	NDFIP1	1-150-0-0-0	6	0.121772	0.414221
8450	HAVCR2	1-150-0-0-0	6	0.121772	0.414221
12522	AL161725.1	1-150-0-0-0	6	0.121772	0.414221
16436	DUSP16	1-150-0-0-0	6	0.121772	0.414221
1508	NBPF15	1-136-1-0-0	6	0.137864	0
3360	TIA1	1-136-1-0-0	6	0.137864	0
12900	IARS	1-136-1-0-0	6	0.137864	0
16920	STAT2	1-136-1-0-0	6	0.137864	0
17170	LINC02391	1-136-1-0-0	6	0.137864	0
24374	ZNF253	1-136-1-0-0	6	0.137864	0
2150	GLUL	1-133-1-0-1	6	0.0783721	0.199744
5398	KCTD6	1-133-1-0-1	6	0.0783721	0.199744
9980	FUCA2	1-133-1-0-1	6	0.0783721	0.199744
22298	AARSD1	1-133-1-0-1	6	0.0783721	0.199744
23998	SWSAP1	1-133-1-0-1	6	0.0783721	0.199744
25880	ADA	1-133-1-0-1	6	0.0783721	0.199744
46	ATAD3B	1-124-4-0-0	6	0.0668169	0.234626
4594	LINC00471	1-124-4-0-0	6	0.0668169	0.234626
7008	AC097460.1	1-124-4-0-0	6	0.0668169	0.234626
16308	PTPN6	1-124-4-0-0	6	0.0668169	0.234626
18922	NGB	1-124-4-0-0	6	0.0668169	0.234626
22088	AC025211.1	1-124-4-0-0	6	0.0668169	0.234626
1296	DPH5	1-120-0-0-0	6	0.120985	0.364095
1346	PSMA5	1-120-0-0-0	6	0.120985	0.364095
3236	PUS10	1-120-0-0-0	6	0.120985	0.364095
17732	LATS2	1-120-0-0-0	6	0.120985	0.364095
19950	AC015871.7	1-120-0-0-0	6	0.120985	0.364095
23786	CATSPERD	1-120-0-0-0	6	0.120985	0.364095
5403	AC126121.3_flip	1-12-6-0-0	6	0.202764	0
8924	HIST1H4C	1-12-6-0-0	6	0.202764	0
11664	BIN3	1-12-6-0-0	6	0.202764	0
12006	AC027018.1	1-12-6-0-0	6	0.202764	0
18079	EDNRB-AS1_flip	1-12-6-0-0	6	0.202764	0
24376	ZNF93	1-12-6-0-0	6	0.202764	0
6892	HNRNPD	1-12-3-0-0	6	0.127225	0
9304	CPNE5	1-12-3-0-0	6	0.127225	0
17664	STX2	1-12-3-0-0	6	0.127225	0
18938	ALKBH1	1-12-3-0-0	6	0.127225	0
19488	EIF3J	1-12-3-0-0	6	0.127225	0
24248	BST2	1-12-3-0-0	6	0.127225	0
5064	SS18L2	1-118-0-0-0	6	0.113641	0.339704
5642	ZBTB20-AS5	1-118-0-0-0	6	0.113641	0.339704
13002	GALNT12	1-118-0-0-0	6	0.113641	0.339704
14828	DENND5A	1-118-0-0-0	6	0.113641	0.339704
20940	AC007347.1	1-118-0-0-0	6	0.113641	0.339704
25612	NAA20	1-118-0-0-0	6	0.113641	0.339704
8748	AL021328.1	1-106-3-0-0	6	0.10652	0
10544	PSMA2	1-106-3-0-0	6	0.10652	0
13456	QSOX2	1-106-3-0-0	6	0.10652	0
15612	COA4	1-106-3-0-0	6	0.10652	0
17910	NUFIP1	1-106-3-0-0	6	0.10652	0
24228	OCEL1	1-106-3-0-0	6	0.10652	0
214	MTHFR	1-106-2-0-0	6	0.0910438	0.304535
5106	EXOSC7	1-106-2-0-0	6	0.0910438	0.304535
12816	CARNMT1-AS1	1-106-2-0-0	6	0.0910438	0.304535
14850	AC011092.3	1-106-2-0-0	6	0.0910438	0.304535
22716	PRKCA-AS1	1-106-2-0-0	6	0.0910438	0.304535
25992	BCAS4	1-106-2-0-0	6	0.0910438	0.304535
856	GPBP1L1	1-102-0-0-0	6	0.106818	0.275705
1568	GPR89B	1-102-0-0-0	6	0.106818	0.275705
9792	DSE	1-102-0-0-0	6	0.106818	0.275705
14486	SHTN1	1-102-0-0-0	6	0.106818	0.275705
27398	FAM156A	1-102-0-0-0	6	0.106818	0.275705
27510	NHSL2	1-102-0-0-0	6	0.106818	0.275705
7075	SEC24B-AS1_flip	1-96-8-0-0	5	0.203307	0
13438	VAV2	1-96-8-0-0	5	0.203307	0
17324	PWP1	1-96-8-0-0	5	0.203307	0
18900	GPATCH2L	1-96-8-0-0	5	0.203307	0
19243	ATP10A_flip	1-96-8-0-0	5	0.203307	0
3930	GTDC1	1-96-6-0-0	5	0.140931	0
9206	RXRB	1-96-6-0-0	5	0.140931	0
16114	STT3A	1-96-6-0-0	5	0.140931	0
18201	DCUN1D2_flip	1-96-6-0-0	5	0.140931	0
24198	AC008764.8	1-96-6-0-0	5	0.140931	0
3352	MXD1	1-96-0-0-0	5	0.158082	0.265115
11698	PPP2R2A	1-96-0-0-0	5	0.158082	0.265115
15504	RPS6KB2	1-96-0-0-0	5	0.158082	0.265115
19382	SPINT1	1-96-0-0-0	5	0.158082	0.265115
27276	BCOR	1-96-0-0-0	5	0.158082	0.265115
822	KIF2C	1-94-4-0-0	5	0.0555175	0.190911
2546	TRIM11	1-94-4-0-0	5	0.0555175	0.190911
17514	GATC	1-94-4-0-0	5	0.0555175	0.190911
18802	DCAF4	1-94-4-0-0	5	0.0555175	0.190911
19554	USP50	1-94-4-0-0	5	0.0555175	0.190911
992	OMA1	1-93-4-0-0	5	0.0733844	0
6484	LRPAP1	1-93-4-0-0	5	0.0733844	0
8046	STARD4	1-93-4-0-0	5	0.0733844	0
14554	LHPP	1-93-4-0-0	5	0.0733844	0
24306	LRRC25	1-93-4-0-0	5	0.0733844	0
2679	SDCCAG8_flip	1-93-3-0-1	5	0.134	0.282086
8539	RPL26L1_flip	1-93-3-0-1	5	0.134	0.282086
18391	SDR39U1_flip	1-93-3-0-1	5	0.134	0.282086
22514	LUC7L3	1-93-3-0-1	5	0.134	0.282086
27968	MT-ATP6	1-93-3-0-1	5	0.134	0.282086
14668	IRF7	1-93-3-0-0	5	0.167494	0.282086
15238	EEF1G	1-93-3-0-0	5	0.167494	0.282086
20402	NUDT16L1	1-93-3-0-0	5	0.167494	0.282086
23590	CIRBP	1-93-3-0-0	5	0.167494	0.282086
25786	NORAD	1-93-3-0-0	5	0.167494	0.282086
3196	RPS27A	1-93-0-0-0	5	0.143001	1.43548
20278	RPS2	1-93-0-0-0	5	0.143001	1.43548
21414	RPL13	1-93-0-0-0	5	0.143001	1.43548
25014	RPL13A	1-93-0-0-0	5	0.143001	1.43548
25016	RPS11	1-93-0-0-0	5	0.143001	1.43548
6094	GOLIM4	1-87-5-0-0	5	0.186149	0
15886	ZC3H12C	1-87-5-0-0	5	0.186149	0
16060	TBCEL	1-87-5-0-0	5	0.186149	0
21162	EXOSC6	1-87-5-0-0	5	0.186149	0
25948	PREX1	1-87-5-0-0	5	0.186149	0
5297	ALAS1_flip	1-86-7-0-0	5	0.134548	0
9508	BAG2	1-86-7-0-0	5	0.134548	0
14695	PNPLA2_flip	1-86-7-0-0	5	0.134548	0
18970	LINC02316	1-86-7-0-0	5	0.134548	0
22402	ARL17A	1-86-7-0-0	5	0.134548	0
6042	LINC00886	1-86-6-0-0	5	0.147944	0
7567	SLC1A3_flip	1-86-6-0-0	5	0.147944	0
12141	CCNE2_flip	1-86-6-0-0	5	0.147944	0
16004	ARCN1	1-86-6-0-0	5	0.147944	0
24759	ARHGEF1_flip	1-86-6-0-0	5	0.147944	0
10294	RAC1	1-82-6-0-0	5	0.125065	0
13136	ASTN2	1-82-6-0-0	5	0.125065	0
14888	PSMA1	1-82-6-0-0	5	0.125065	0
17568	PSMD9	1-82-6-0-0	5	0.125065	0
20320	PDPK1	1-82-6-0-0	5	0.125065	0
7928	CCNH	1-82-2-0-0	5	0.102411	0.176254
10242	EIF3B	1-82-2-0-0	5	0.102411	0.176254
12112	LRRC69	1-82-2-0-0	5	0.102411	0.176254
12274	ENPP2	1-82-2-0-0	5	0.102411	0.176254
23202	CEP192	1-82-2-0-0	5	0.102411	0.176254
2134	QSOX1	1-81-7-0-0	5	0.145995	0
6874	AC098818.2	1-81-7-0-0	5	0.145995	0
12970	MFSD14C	1-81-7-0-0	5	0.145995	0
13740	ANKRD26	1-81-7-0-0	5	0.145995	0
14006	MCU	1-81-7-0-0	5	0.145995	0
2256	KIF21B	1-81-3-0-0	5	0.156087	0.285173
7586	FYB1	1-81-3-0-0	5	0.156087	0.285173
8996	ZSCAN9	1-81-3-0-0	5	0.156087	0.285173
19590	MYO5A	1-81-3-0-0	5	0.156087	0.285173
24698	AKT2	1-81-3-0-0	5	0.156087	0.285173
3111	AC010883.3_flip	1-81-2-1-0	5	0.135113	0
6684	AC095057.3	1-81-2-1-0	5	0.135113	0
10806	CD36	1-81-2-1-0	5	0.135113	0
17268	PARPBP	1-81-2-1-0	5	0.135113	0
18800	DPF3	1-81-2-1-0	5	0.135113	0
12366	AF230666.1	1-78-7-0-0	5	0.0896776	0
16216	ITFG2-AS1	1-78-7-0-0	5	0.0896776	0
21818	LRRC75A	1-78-7-0-0	5	0.0896776	0
24572	ZNF829	1-78-7-0-0	5	0.0896776	0
25182	ZNF331	1-78-7-0-0	5	0.0896776	0
12708	CREB3	1-78-6-0-0	5	0.093886	0.41855
14942	SVIP	1-78-6-0-0	5	0.093886	0.41855
15020	PRR5L	1-78-6-0-0	5	0.093886	0.41855
19232	SNRPN	1-78-6-0-0	5	0.093886	0.41855
26922	MEI1	1-78-6-0-0	5	0.093886	0.41855
34	CPTP	1-78-10-0-0	5	0.11942	0
106	AJAP1	1-78-10-0-0	5	0.11942	0
1954	FCRLA	1-78-10-0-0	5	0.11942	0
8950	HIST1H4H	1-78-10-0-0	5	0.11942	0
17678	DDX51	1-78-10-0-0	5	0.11942	0
9814	PLN	1-78-0-0-0	5	0.109658	0
10986	ZCWPW1	1-78-0-0-0	5	0.109658	0
13646	PRPF18	1-78-0-0-0	5	0.109658	0
19068	LINC02292	1-78-0-0-0	5	0.109658	0
25960	DDX27	1-78-0-0-0	5	0.109658	0
1244	BCAR3	1-76-7-0-0	5	0.200321	0
3832	WDR33	1-76-7-0-0	5	0.200321	0
5281	RBM15B_flip	1-76-7-0-0	5	0.200321	0
10296	DAGLB	1-76-7-0-0	5	0.200321	0
20972	FAM192A	1-76-7-0-0	5	0.200321	0
1920	PFDN2	1-72-1-0-0	5	0.099287	0.209217
8682	TRIM52	1-72-1-0-0	5	0.099287	0.209217
23306	ZNF24	1-72-1-0-0	5	0.099287	0.209217
26998	SMC1B	1-72-1-0-0	5	0.099287	0.209217
27568	RPA4	1-72-1-0-0	5	0.099287	0.209217
2619	IRF2BP2_flip	1-70-3-0-0	5	0.154498	0
3576	ITPRIPL1	1-70-3-0-0	5	0.154498	0
7277	TRIM2_flip	1-70-3-0-0	5	0.154498	0
22239	TTC25_flip	1-70-3-0-0	5	0.154498	0
25867	MYBL2_flip	1-70-3-0-0	5	0.154498	0
3496	C2orf68	1-68-2-0-0	5	0.14538	0.460771
7230	SLC10A7	1-68-2-0-0	5	0.14538	0.460771
7240	DCLK2	1-68-2-0-0	5	0.14538	0.460771
21220	LINC01572	1-68-2-0-0	5	0.14538	0.460771
27200	SCML1	1-68-2-0-0	5	0.14538	0.460771
10366	MACC1	1-68-0-0-0	5	0.0830517	0.162986
10646	SUMF2	1-68-0-0-0	5	0.0830517	0.162986
18056	COMMD6	1-68-0-0-0	5	0.0830517	0.162986
23160	AP005899.1	1-68-0-0-0	5	0.0830517	0.162986
27552	ITM2A	1-68-0-0-0	5	0.0830517	0.162986
2795	YWHAQ_flip	1-64-5-0-0	5	0.170006	0
5587	DPPA4_flip	1-64-5-0-0	5	0.170006	0
19057	IFI27L1_flip	1-64-5-0-0	5	0.170006	0
22449	SKAP1_flip	1-64-5-0-0	5	0.170006	0
27221	EIF1AX_flip	1-64-5-0-0	5	0.170006	0
6652	TLR6	1-64-0-0-0	5	0.133332	0
6850	NAAA	1-64-0-0-0	5	0.133332	0
8952	BTN3A2	1-64-0-0-0	5	0.133332	0
15172	STX3	1-64-0-0-0	5	0.133332	0
19394	OIP5-AS1	1-64-0-0-0	5	0.133332	0
1147	LPAR3_flip	1-63-4-0-0	5	0.231489	0
11842	AP3M2	1-63-4-0-0	5	0.231489	0
14561	EEF1AKMT2_flip	1-63-4-0-0	5	0.231489	0
22944	USP36	1-63-4-0-0	5	0.231489	0
24052	MAN2B1	1-63-4-0-0	5	0.231489	0
6704	GUF1	1-6-10-0-0	5	0.1259	0
14590	MKI67	1-6-10-0-0	5	0.1259	0
14952	BDNF-AS	1-6-10-0-0	5	0.1259	0
15859	SLC35F2_flip	1-6-10-0-0	5	0.1259	0
18821	AC005225.3_flip	1-6-10-0-0	5	0.1259	0
784	SLC2A1-AS1	1-59-1-0-0	5	0.0654738	0
13586	ANKRD16	1-59-1-0-0	5	0.0654738	0
18580	GMFB	1-59-1-0-0	5	0.0654738	0
20424	METTL22	1-59-1-0-0	5	0.0654738	0
22794	RAB37	1-59-1-0-0	5	0.0654738	0
146	ENO1	1-55-0-0-0	5	0.112361	0.233741
5000	CTDSPL	1-55-0-0-0	5	0.112361	0.233741
15050	PRDM11	1-55-0-0-0	5	0.112361	0.233741
15558	AP002336.2	1-55-0-0-0	5	0.112361	0.233741
25766	ERGIC3	1-55-0-0-0	5	0.112361	0.233741
5506	GABRR3	1-541-0-0-0	5	0.0348304	0
5688	HGD	1-541-0-0-0	5	0.0348304	0
6216	FAM131A	1-541-0-0-0	5	0.0348304	0
11876	MCM4	1-541-0-0-0	5	0.0348304	0
17660	AC108704.1	1-541-0-0-0	5	0.0348304	0
12342	LINC00824	1-524-0-0-0	5	0.0268819	0
12496	PPP1R16A	1-524-0-0-0	5	0.0268819	0
14688	SLC25A22	1-524-0-0-0	5	0.0268819	0
22638	AC005856.1	1-524-0-0-0	5	0.0268819	0
24596	ZNF571-AS1	1-524-0-0-0	5	0.0268819	0
7856	ZBED3-AS1	1-51-6-0-0	5	0.115764	0
8024	FBXL17	1-51-6-0-0	5	0.115764	0
15732	PICALM	1-51-6-0-0	5	0.115764	0
16952	R3HDM2	1-51-6-0-0	5	0.115764	0
19666	ICE2	1-51-6-0-0	5	0.115764	0
2016	SFT2D2	1-51-1-0-0	5	0.124986	1.23139
9744	FIG4	1-51-1-0-0	5	0.124986	1.23139
11650	PPP3CC	1-51-1-0-0	5	0.124986	1.23139
18984	ZC3H14	1-51-1-0-0	5	0.124986	1.23139
27842	ABCD1	1-51-1-0-0	5	0.124986	1.23139
2877	SF3B6_flip	1-50-6-0-0	5	0.237596	0
14398	PDCD11	1-50-6-0-0	5	0.237596	0
18686	WDR89	1-50-6-0-0	5	0.237596	0
26212	AP001439.1	1-50-6-0-0	5	0.237596	0
27543	PGK1_flip	1-50-6-0-0	5	0.237596	0
7802	MCCC2	1-50-2-0-0	5	0.129672	0
9050	DHX16	1-50-2-0-0	5	0.129672	0
19672	AC009554.1	1-50-2-0-0	5	0.129672	0
20488	AC007598.2	1-50-2-0-0	5	0.129672	0
24804	PLAUR	1-50-2-0-0	5	0.129672	0
6970	GPRIN3	1-50-1-0-0	5	0.0751485	0
7030	CISD2	1-50-1-0-0	5	0.0751485	0
16760	LIMA1	1-50-1-0-0	5	0.0751485	0
16864	ITGA5	1-50-1-0-0	5	0.0751485	0
27708	C1GALT1C1	1-50-1-0-0	5	0.0751485	0
10802	MAGI2	1-494-0-0-0	5	0.0257513	0
11350	AC083880.1	1-494-0-0-0	5	0.0257513	0
21338	AC092723.1	1-494-0-0-0	5	0.0257513	0
22884	RNF157	1-494-0-0-0	5	0.0257513	0
27284	MED14OS	1-494-0-0-0	5	0.0257513	0
12343	LINC00824_flip	1-493-0-0-0	5	0.0268819	0
12497	PPP1R16A_flip	1-493-0-0-0	5	0.0268819	0
14689	SLC25A22_flip	1-493-0-0-0	5	0.0268819	0
22639	AC005856.1_flip	1-493-0-0-0	5	0.0268819	0
24597	ZNF571-AS1_flip	1-493-0-0-0	5	0.0268819	0
4494	CNPPD1	1-48-8-0-0	5	0.132099	0
12550	RIC1	1-48-8-0-0	5	0.132099	0
18907	VASH1_flip	1-48-8-0-0	5	0.132099	0
22964	GAA	1-48-8-0-0	5	0.132099	0
24956	CARD8-AS1	1-48-8-0-0	5	0.132099	0
11672	RHOBTB2	1-48-7-0-0	5	0.138826	0
17996	RNASEH2B	1-48-7-0-0	5	0.138826	0
18304	ACIN1	1-48-7-0-0	5	0.138826	0
20368	CLUAP1	1-48-7-0-0	5	0.138826	0
23262	IMPACT	1-48-7-0-0	5	0.138826	0
4266	PGAP1	1-48-5-0-0	5	0.187013	0.249158
11722	FZD3	1-48-5-0-0	5	0.187013	0.249158
18034	TDRD3	1-48-5-0-0	5	0.187013	0.249158
18052	KLF12	1-48-5-0-0	5	0.187013	0.249158
26920	SNU13	1-48-5-0-0	5	0.187013	0.249158
2806	ODC1	1-47-3-0-0	5	0.165048	0
12636	DNAJA1	1-47-3-0-0	5	0.165048	0
14720	TNNT3	1-47-3-0-0	5	0.165048	0
16116	CHEK1	1-47-3-0-0	5	0.165048	0
19470	PDIA3	1-47-3-0-0	5	0.165048	0
3232	LINC01185	1-47-1-0-0	5	0.378703	0.491132
7872	ARSB	1-47-1-0-0	5	0.378703	0.491132
8600	PDLIM7	1-47-1-0-0	5	0.378703	0.491132
12228	DCAF13	1-47-1-0-0	5	0.378703	0.491132
12531	RFX3_flip	1-47-1-0-0	5	0.378703	0.491132
10275	FBXL18_flip	1-45-8-0-0	5	0.19142	0
13556	IDI2-AS1	1-45-8-0-0	5	0.19142	0
14205	MYOF_flip	1-45-8-0-0	5	0.19142	0
14323	HIF1AN_flip	1-45-8-0-0	5	0.19142	0
14354	NOLC1	1-45-8-0-0	5	0.19142	0
1720	CREB3L4	1-45-3-0-0	5	0.154767	0
3359	C2orf42_flip	1-45-3-0-0	5	0.154767	0
6467	TNIP2_flip	1-45-3-0-0	5	0.154767	0
23626	SCAMP4	1-45-3-0-0	5	0.154767	0
26530	SERPIND1	1-45-3-0-0	5	0.154767	0
2911	HADHA_flip	1-45-2-0-0	5	0.135546	0.412826
4975	UBP1_flip	1-45-2-0-0	5	0.135546	0.412826
11921	UBXN2B_flip	1-45-2-0-0	5	0.135546	0.412826
14141	LINC00863_flip	1-45-2-0-0	5	0.135546	0.412826
23645	SF3A2_flip	1-45-2-0-0	5	0.135546	0.412826
5234	TRAIP	1-421-1-0-0	5	0.0193267	0
5254	HYAL3	1-421-1-0-0	5	0.0193267	0
10896	AC002429.2	1-421-1-0-0	5	0.0193267	0
13624	ECHDC3	1-421-1-0-0	5	0.0193267	0
25596	AL049646.1	1-421-1-0-0	5	0.0193267	0
2086	RC3H1-IT1	1-407-0-0-0	5	0.0167447	0
2180	AL713852.1	1-407-0-0-0	5	0.0167447	0
13732	THNSL1	1-407-0-0-0	5	0.0167447	0
19330	LINC02694	1-407-0-0-0	5	0.0167447	0
27240	AC131011.1	1-407-0-0-0	5	0.0167447	0
3944	MBD5	1-400-0-0-0	5	0.151479	0
5150	KLHL18	1-400-0-0-0	5	0.151479	0
19808	MYO9A	1-400-0-0-0	5	0.151479	0
21336	AC092723.4	1-400-0-0-0	5	0.151479	0
25444	PSMF1	1-400-0-0-0	5	0.151479	0
540	LAPTM5	1-4-9-0-0	5	0.141914	0
3374	NAGK	1-4-9-0-0	5	0.141914	0
6154	ACTL6A	1-4-9-0-0	5	0.141914	0
7342	SH3RF1	1-4-9-0-0	5	0.141914	0
27112	P2RY8	1-4-9-0-0	5	0.141914	0
713	PABPC4-AS1_flip	1-4-16-0-0	5	0.13949	0
12544	INSL6	1-4-16-0-0	5	0.13949	0
16277	AC006064.2_flip	1-4-16-0-0	5	0.13949	0
18309	RNF212B_flip	1-4-16-0-0	5	0.13949	0
20604	OTOA	1-4-16-0-0	5	0.13949	0
1422	SLC16A1-AS1	1-4-13-0-0	5	0.130414	0
4574	SP100	1-4-13-0-0	5	0.130414	0
4736	ITPR1	1-4-13-0-0	5	0.130414	0
12468	SHARPIN	1-4-13-0-0	5	0.130414	0
15796	SRSF8	1-4-13-0-0	5	0.130414	0
148	GPR157	1-4-10-0-0	5	0.0879057	0
5854	NPHP3	1-4-10-0-0	5	0.0879057	0
21403	ZNF778_flip	1-4-10-0-0	5	0.0879057	0
22858	GALK1	1-4-10-0-0	5	0.0879057	0
24210	AC024075.2	1-4-10-0-0	5	0.0879057	0
5630	AC128687.3	1-4-0-1-0	5	0.134297	0.268416
14264	EXOSC1	1-4-0-1-0	5	0.134297	0.268416
16648	IRAK4	1-4-0-1-0	5	0.134297	0.268416
17232	TMPO	1-4-0-1-0	5	0.134297	0.268416
19656	AC092868.2	1-4-0-1-0	5	0.134297	0.268416
2830	NBAS	1-39-9-0-0	5	0.165575	0
10464	GARS-DT	1-39-9-0-0	5	0.165575	0
17816	N4BP2L2	1-39-9-0-0	5	0.165575	0
22938	PGS1	1-39-9-0-0	5	0.165575	0
24350	MAU2	1-39-9-0-0	5	0.165575	0
7010	PPP3CA	1-39-0-1-0	5	0.164007	0
19505	AC051619.6_flip	1-39-0-1-0	5	0.164007	0
24420	AC092329.4	1-39-0-1-0	5	0.164007	0
27587	ARMCX6_flip	1-39-0-1-0	5	0.164007	0
27662	KLHL13	1-39-0-1-0	5	0.164007	0
15335	PRDX5_flip	1-39-0-0-1	5	0.12537	0.286713
21271	MAF_flip	1-39-0-0-1	5	0.12537	0.286713
21711	TRAPPC1_flip	1-39-0-0-1	5	0.12537	0.286713
21977	AC010761.4_flip	1-39-0-0-1	5	0.12537	0.286713
27855	HCFC1_flip	1-39-0-0-1	5	0.12537	0.286713
5424	SLC25A26	1-381-1-0-0	5	0.113548	0
5595	ABHD10_flip	1-381-1-0-0	5	0.113548	0
6912	AC073840.1	1-381-1-0-0	5	0.113548	0
10264	AC092428.1	1-381-1-0-0	5	0.113548	0
14926	SPTY2D1OS	1-381-1-0-0	5	0.113548	0
3112	ZFP36L2	1-372-0-0-0	5	0.148344	0
17260	GNPTAB	1-372-0-0-0	5	0.148344	0
26838	CBX6	1-372-0-0-0	5	0.148344	0
27446	SPIN2B	1-372-0-0-0	5	0.148344	0
27718	OCRL	1-372-0-0-0	5	0.148344	0
114	ICMT	1-363-0-1-0	5	0.0205301	0
4608	TIGD1	1-363-0-1-0	5	0.0205301	0
20290	NTHL1	1-363-0-1-0	5	0.0205301	0
27010	CDPF1	1-363-0-1-0	5	0.0205301	0
27386	PRICKLE3	1-363-0-1-0	5	0.0205301	0
8118	LINC02240	1-360-1-0-0	5	0.0221454	0
8460	AC016571.1	1-360-1-0-0	5	0.0221454	0
10398	STK31	1-360-1-0-0	5	0.0221454	0
11644	NUDT18	1-360-1-0-0	5	0.0221454	0
12386	AC083843.2	1-360-1-0-0	5	0.0221454	0
1338	AL356488.2	1-360-0-0-0	5	0.0150108	0
8320	DND1	1-360-0-0-0	5	0.0150108	0
15236	AP001363.2	1-360-0-0-0	5	0.0150108	0
16278	LPAR5	1-360-0-0-0	5	0.0150108	0
19836	REC114	1-360-0-0-0	5	0.0150108	0
3888	R3HDM1	1-358-0-0-0	5	0.151959	0
5040	EIF1B-AS1	1-358-0-0-0	5	0.151959	0
17746	MIPEP	1-358-0-0-0	5	0.151959	0
23104	YES1	1-358-0-0-0	5	0.151959	0
27889	G6PD_flip	1-358-0-0-0	5	0.151959	0
14940	GAS2	1-341-0-0-0	5	0.029794	0
17198	AC073655.2	1-341-0-0-0	5	0.029794	0
20798	ZNF764	1-341-0-0-0	5	0.029794	0
22940	DNAH17	1-341-0-0-0	5	0.029794	0
26482	DGCR11	1-341-0-0-0	5	0.029794	0
3328	PPP3R1	1-34-7-0-0	5	0.173958	0
4698	FARP2	1-34-7-0-0	5	0.173958	0
4948	TGFBR2	1-34-7-0-0	5	0.173958	0
18670	MNAT1	1-34-7-0-0	5	0.173958	0
26168	HSPA13	1-34-7-0-0	5	0.173958	0
6615	ZCCHC4_flip	1-34-2-0-0	5	0.0841852	0.242561
9881	MOXD1_flip	1-34-2-0-0	5	0.0841852	0.242561
16125	RPUSD4_flip	1-34-2-0-0	5	0.0841852	0.242561
18699	AL122035.1_flip	1-34-2-0-0	5	0.0841852	0.242561
20561	AC099518.4_flip	1-34-2-0-0	5	0.0841852	0.242561
2554	AL117350.1	1-331-0-0-0	5	0.0187594	0.0445311
3400	AC074008.1	1-331-0-0-0	5	0.0187594	0.0445311
10220	GPR146	1-331-0-0-0	5	0.0187594	0.0445311
17712	TPTE2	1-331-0-0-0	5	0.0187594	0.0445311
18616	AL161757.5	1-331-0-0-0	5	0.0187594	0.0445311
240	AL031283.1	1-328-1-0-0	5	0.0204588	0
894	LINC01389	1-328-1-0-0	5	0.0204588	0
8530	SH3PXD2B	1-328-1-0-0	5	0.0204588	0
16076	CRTAM	1-328-1-0-0	5	0.0204588	0
24214	TMEM38A	1-328-1-0-0	5	0.0204588	0
4814	VGLL4	1-32-0-0-0	5	0.242032	0
12072	RBIS	1-32-0-0-0	5	0.242032	0
17355	KCTD10_flip	1-32-0-0-0	5	0.242032	0
20962	SLC12A3	1-32-0-0-0	5	0.242032	0
23621	KLF16_flip	1-32-0-0-0	5	0.242032	0
524	SNHG12	1-319-0-0-0	5	0.0936025	0
4688	MTERF4	1-319-0-0-0	5	0.0936025	0
5246	GNAI2	1-319-0-0-0	5	0.0936025	0
11484	RHEB	1-319-0-0-0	5	0.0936025	0
19566	AC066613.2	1-319-0-0-0	5	0.0936025	0
5148	KIF9	1-307-0-0-0	5	0.216117	0
10650	CHCHD2	1-307-0-0-0	5	0.216117	0
14434	DUSP5	1-307-0-0-0	5	0.216117	0
15007	PDHX_flip	1-307-0-0-0	5	0.216117	0
19091	VRK1_flip	1-307-0-0-0	5	0.216117	0
52	AL645728.1	1-301-1-0-0	5	0.12708	0
792	SZT2	1-301-1-0-0	5	0.12708	0
1647	C1orf56_flip	1-301-1-0-0	5	0.12708	0
7916	TMEM167A	1-301-1-0-0	5	0.12708	0
8341	FCHSD1_flip	1-301-1-0-0	5	0.12708	0
6326	LINC00885	1-29-13-0-0	5	0.053835	0
6670	UGDH	1-29-13-0-0	5	0.053835	0
9462	ENPP4	1-29-13-0-0	5	0.053835	0
16322	RBP5	1-29-13-0-0	5	0.053835	0
19702	CIAO2A	1-29-13-0-0	5	0.053835	0
1450	NRAS	1-29-10-0-0	5	0.111653	0.269362
9762	SLC16A10	1-29-10-0-0	5	0.111653	0.269362
16300	SPSB2	1-29-10-0-0	5	0.111653	0.269362
22608	AC091271.1	1-29-10-0-0	5	0.111653	0.269362
27490	IL2RG	1-29-10-0-0	5	0.111653	0.269362
1535	RBM8A_flip	1-281-1-0-0	5	0.238368	0
1554	PRKAB2	1-281-1-0-0	5	0.238368	0
3412	TET3	1-281-1-0-0	5	0.238368	0
17698	ZNF605	1-281-1-0-0	5	0.238368	0
27895	DKC1_flip	1-281-1-0-0	5	0.238368	0
4158	AC010680.3	1-278-1-0-0	5	0.170639	0.244392
12470	MAF1	1-278-1-0-0	5	0.170639	0.244392
15204	TKFC	1-278-1-0-0	5	0.170639	0.244392
19342	SRP14	1-278-1-0-0	5	0.170639	0.244392
26034	PMEPA1	1-278-1-0-0	5	0.170639	0.244392
1912	F11R	1-272-0-0-0	5	0.128925	0.20465
7026	AC018797.3	1-272-0-0-0	5	0.128925	0.20465
13398	RAPGEF1	1-272-0-0-0	5	0.128925	0.20465
23092	AC139099.2	1-272-0-0-0	5	0.128925	0.20465
24114	NANOS3	1-272-0-0-0	5	0.128925	0.20465
7960	AC114980.1	1-269-3-0-0	5	0.132545	0.195939
10084	AL049820.1	1-269-3-0-0	5	0.132545	0.195939
12682	VCP	1-269-3-0-0	5	0.132545	0.195939
15838	PDGFD	1-269-3-0-0	5	0.132545	0.195939
19184	SIVA1	1-269-3-0-0	5	0.132545	0.195939
4636	AC012063.1	1-263-0-0-0	5	0.0201594	0.0905877
5366	AC093928.1	1-263-0-0-0	5	0.0201594	0.0905877
18478	C14orf28	1-263-0-0-0	5	0.0201594	0.0905877
19990	GOLGA6L10	1-263-0-0-0	5	0.0201594	0.0905877
24974	DBP	1-263-0-0-0	5	0.0201594	0.0905877
1725	RPS27_flip	1-261-2-0-0	5	0.453076	0
9991	SF3B5_flip	1-261-2-0-0	5	0.453076	0
14837	AC132192.2_flip	1-261-2-0-0	5	0.453076	0
14929	SPTY2D1_flip	1-261-2-0-0	5	0.453076	0
27813	LINC00893_flip	1-261-2-0-0	5	0.453076	0
10754	SPDYE5	1-256-6-0-0	5	0.03	0
16032	DPAGT1	1-256-6-0-0	5	0.03	0
16836	PCBP2-OT1	1-256-6-0-0	5	0.03	0
20358	MEFV	1-256-6-0-0	5	0.03	0
24900	PTGIR	1-256-6-0-0	5	0.03	0
1270	SLC35A3	1-252-1-0-0	5	0.159095	0.328267
6584	LAP3	1-252-1-0-0	5	0.159095	0.328267
9378	TBCC	1-252-1-0-0	5	0.159095	0.328267
12624	ACO1	1-252-1-0-0	5	0.159095	0.328267
18604	KTN1-AS1	1-252-1-0-0	5	0.159095	0.328267
7322	2023-03-01	1-248-2-0-0	5	0.12586	0
8242	FAM13B	1-248-2-0-0	5	0.12586	0
17578	VPS33A	1-248-2-0-0	5	0.12586	0
17604	C12orf65	1-248-2-0-0	5	0.12586	0
20152	MEF2A	1-248-2-0-0	5	0.12586	0
14546	BUB3	1-240-0-0-0	5	0.110488	0.374009
19822	HEXA	1-240-0-0-0	5	0.110488	0.374009
20786	DCTPP1	1-240-0-0-0	5	0.110488	0.374009
23230	SNRPD1	1-240-0-0-0	5	0.110488	0.374009
26050	NELFCD	1-240-0-0-0	5	0.110488	0.374009
2632	RBM34	1-239-0-0-0	5	0.0979808	0.120667
7306	C4orf46	1-239-0-0-0	5	0.0979808	0.120667
12918	ZNF484	1-239-0-0-0	5	0.0979808	0.120667
12994	TRIM14	1-239-0-0-0	5	0.0979808	0.120667
25782	SCAND1	1-239-0-0-0	5	0.0979808	0.120667
818	TMEM53	1-237-0-0-0	5	0.396336	0.57519
2860	RHOB	1-237-0-0-0	5	0.396336	0.57519
3078	SRSF7	1-237-0-0-0	5	0.396336	0.57519
10724	EIF4H	1-237-0-0-0	5	0.396336	0.57519
19710	CSNK1G1	1-237-0-0-0	5	0.396336	0.57519
16270	IFFO1	1-226-3-0-0	5	0.101352	0
16911	COQ10A_flip	1-226-3-0-0	5	0.101352	0
18284	SLC7A7	1-226-3-0-0	5	0.101352	0
24897	PPP5C_flip	1-226-3-0-0	5	0.101352	0
26799	MICALL1_flip	1-226-3-0-0	5	0.101352	0
994	MYSM1	1-225-4-0-0	5	0.145519	0
4862	SH3BP5	1-225-4-0-0	5	0.145519	0
7117	PDE5A_flip	1-225-4-0-0	5	0.145519	0
8956	BTN3A1	1-225-4-0-0	5	0.145519	0
18312	PPP1R3E	1-225-4-0-0	5	0.145519	0
1329	CLCC1_flip	1-220-0-0-0	5	0.0743714	0.235564
2445	EPRS_flip	1-220-0-0-0	5	0.0743714	0.235564
5291	ABHD14A_flip	1-220-0-0-0	5	0.0743714	0.235564
10247	LFNG_flip	1-220-0-0-0	5	0.0743714	0.235564
12511	ZNF250_flip	1-220-0-0-0	5	0.0743714	0.235564
6628	TBC1D19	1-200-0-0-0	5	0.0854769	0
12180	VPS13B	1-200-0-0-0	5	0.0854769	0
13046	TMEM38B	1-200-0-0-0	5	0.0854769	0
16442	CDKN1B	1-200-0-0-0	5	0.0854769	0
21340	MTHFSD	1-200-0-0-0	5	0.0854769	0
2847	AC130814.1_flip	1-20-4-0-0	5	0.109705	0.431028
18019	THSD1_flip	1-20-4-0-0	5	0.109705	0.431028
21835	COPS3_flip	1-20-4-0-0	5	0.109705	0.431028
24353	GATAD2A_flip	1-20-4-0-0	5	0.109705	0.431028
25265	KMT5C_flip	1-20-4-0-0	5	0.109705	0.431028
3706	GCC2	1-20-11-0-0	5	0.167564	0
4081	GORASP2_flip	1-20-11-0-0	5	0.167564	0
21056	KIAA0895L	1-20-11-0-0	5	0.167564	0
27725	AL034405.1_flip	1-20-11-0-0	5	0.167564	0
27866	AC245140.2	1-20-11-0-0	5	0.167564	0
7574	CPLANE1	1-2-9-0-0	5	0.146889	0
8434	SAP30L-AS1	1-2-9-0-0	5	0.146889	0
11436	ZNF862	1-2-9-0-0	5	0.146889	0
12782	FXN	1-2-9-0-0	5	0.146889	0
17662	GLT1D1	1-2-9-0-0	5	0.146889	0
411	RSRP1_flip	1-190-1-0-0	5	0.144466	0
11501	PAXIP1-AS1_flip	1-190-1-0-0	5	0.144466	0
16564	FAR2	1-190-1-0-0	5	0.144466	0
25227	LENG8-AS1_flip	1-190-1-0-0	5	0.144466	0
26445	YBEY_flip	1-190-1-0-0	5	0.144466	0
9830	TBC1D32	1-183-2-0-0	5	0.697599	0.58347
18846	ALDH6A1	1-183-2-0-0	5	0.697599	0.58347
20274	HAGH	1-183-2-0-0	5	0.697599	0.58347
23400	TCF4	1-183-2-0-0	5	0.697599	0.58347
26208	APP	1-183-2-0-0	5	0.697599	0.58347
1305	NTNG1_flip	1-182-0-0-0	5	0.0666205	0.143879
14651	IFITM1_flip	1-182-0-0-0	5	0.0666205	0.143879
16803	SMIM41_flip	1-182-0-0-0	5	0.0666205	0.143879
19941	CTSH_flip	1-182-0-0-0	5	0.0666205	0.143879
21043	CIAO2B_flip	1-182-0-0-0	5	0.0666205	0.143879
9194	HLA-DMB	1-181-0-1-0	5	0.123625	0.190463
11448	ZNF775	1-181-0-1-0	5	0.123625	0.190463
13528	NRARP	1-181-0-1-0	5	0.123625	0.190463
22212	WIPF2	1-181-0-1-0	5	0.123625	0.190463
26612	ASPHD2	1-181-0-1-0	5	0.123625	0.190463
7424	ANKRD37	1-181-0-0-0	5	0.0578705	0.161781
16138	GSEC	1-181-0-0-0	5	0.0578705	0.161781
16802	SMIM41	1-181-0-0-0	5	0.0578705	0.161781
19940	CTSH	1-181-0-0-0	5	0.0578705	0.161781
21042	CIAO2B	1-181-0-0-0	5	0.0578705	0.161781
4650	SCLY	1-18-4-0-0	5	0.12526	0.317604
8036	MAN2A1	1-18-4-0-0	5	0.12526	0.317604
12144	TP53INP1	1-18-4-0-0	5	0.12526	0.317604
26232	GRIK1	1-18-4-0-0	5	0.12526	0.317604
26462	ATP6V1E1	1-18-4-0-0	5	0.12526	0.317604
4560	PID1	1-18-13-0-0	5	0.169693	0
15982	JAML	1-18-13-0-0	5	0.169693	0
20194	AXIN1	1-18-13-0-0	5	0.169693	0
25873	OSER1-DT_flip	1-18-13-0-0	5	0.169693	0
27720	SASH3	1-18-13-0-0	5	0.169693	0
2270	TIMM17A	1-172-0-1-0	5	0.153955	0.19521
15554	LTO1	1-172-0-1-0	5	0.153955	0.19521
15758	AP003120.1	1-172-0-1-0	5	0.153955	0.19521
16120	HYLS1	1-172-0-1-0	5	0.153955	0.19521
26098	DIDO1	1-172-0-1-0	5	0.153955	0.19521
2533	C1orf35_flip	1-170-3-0-0	5	0.119479	0
4539	MRPL44_flip	1-170-3-0-0	5	0.119479	0
15673	AQP11_flip	1-170-3-0-0	5	0.119479	0
20956	BBS2	1-170-3-0-0	5	0.119479	0
27376	TFE3	1-170-3-0-0	5	0.119479	0
460	GPN2	1-162-0-0-0	5	0.0870759	0.179979
4046	TTC21B-AS1	1-162-0-0-0	5	0.0870759	0.179979
8112	CEP120	1-162-0-0-0	5	0.0870759	0.179979
12446	ZNF623	1-162-0-0-0	5	0.0870759	0.179979
21620	KIAA0753	1-162-0-0-0	5	0.0870759	0.179979
4982	ARPP21	1-161-0-1-0	5	0.230483	0
5538	SENP7	1-161-0-1-0	5	0.230483	0
12268	AC023590.1	1-161-0-1-0	5	0.230483	0
12318	RNF139	1-161-0-1-0	5	0.230483	0
17398	CUX2	1-161-0-1-0	5	0.230483	0
1894	NCSTN	1-16-9-0-0	5	0.131778	0
3084	SOS1	1-16-9-0-0	5	0.131778	0
15432	MUS81	1-16-9-0-0	5	0.131778	0
16788	SLC4A8	1-16-9-0-0	5	0.131778	0
16996	USP15	1-16-9-0-0	5	0.131778	0
1547	NBPF10_flip	1-159-2-0-0	5	0.135652	0
10847	CDK14_flip	1-159-2-0-0	5	0.135652	0
11559	MCPH1_flip	1-159-2-0-0	5	0.135652	0
14661	AC137894.3_flip	1-159-2-0-0	5	0.135652	0
19039	GOLGA5_flip	1-159-2-0-0	5	0.135652	0
1546	NBPF10	1-158-2-0-0	5	0.135652	0
10846	CDK14	1-158-2-0-0	5	0.135652	0
11558	MCPH1	1-158-2-0-0	5	0.135652	0
14660	AC137894.3	1-158-2-0-0	5	0.135652	0
19038	GOLGA5	1-158-2-0-0	5	0.135652	0
4806	GHRL	1-154-3-0-0	5	0.0938018	0.179299
8132	2023-03-03	1-154-3-0-0	5	0.0938018	0.179299
13314	GLE1	1-154-3-0-0	5	0.0938018	0.179299
14306	ERLIN1	1-154-3-0-0	5	0.0938018	0.179299
19930	DNAJA4	1-154-3-0-0	5	0.0938018	0.179299
3839	AMMECR1L_flip	1-150-4-0-0	5	0.21771	0
10478	KBTBD2	1-150-4-0-0	5	0.21771	0
11476	AGAP3	1-150-4-0-0	5	0.21771	0
15000	CAT	1-150-4-0-0	5	0.21771	0
18761	EXD2_flip	1-150-4-0-0	5	0.21771	0
6451	NELFA_flip	1-150-2-0-0	5	0.178847	0
14234	CC2D2B	1-150-2-0-0	5	0.178847	0
16280	ACRBP	1-150-2-0-0	5	0.178847	0
20910	TENT4B	1-150-2-0-0	5	0.178847	0
25312	ZNF471	1-150-2-0-0	5	0.178847	0
2140	XPR1	1-149-2-0-0	5	0.254464	0
11690	ADAM28	1-149-2-0-0	5	0.254464	0
14902	PIK3C2A	1-149-2-0-0	5	0.254464	0
16078	JHY	1-149-2-0-0	5	0.254464	0
24334	SUGP2	1-149-2-0-0	5	0.254464	0
4874	BTD	1-148-5-0-0	5	0.162336	0
9848	TRMT11	1-148-5-0-0	5	0.162336	0
13824	AL450326.1	1-148-5-0-0	5	0.162336	0
18768	SUSD6	1-148-5-0-0	5	0.162336	0
25186	AC008440.1	1-148-5-0-0	5	0.162336	0
1936	FCER1G	1-147-6-0-0	5	0.18228	0.23949
6374	RUBCN	1-147-6-0-0	5	0.18228	0.23949
12208	KLF10	1-147-6-0-0	5	0.18228	0.23949
13796	CREM	1-147-6-0-0	5	0.18228	0.23949
24314	FKBP8	1-147-6-0-0	5	0.18228	0.23949
1228	RPL5	1-147-3-0-0	5	0.175677	0.298622
13322	SET	1-147-3-0-0	5	0.175677	0.298622
13422	RPL7A	1-147-3-0-0	5	0.175677	0.298622
13536	MRPL41	1-147-3-0-0	5	0.175677	0.298622
14090	RPS24	1-147-3-0-0	5	0.175677	0.298622
14400	CALHM2	1-147-10-0-0	5	0.120273	0
14824	NRIP3	1-147-10-0-0	5	0.120273	0
22204	THRA	1-147-10-0-0	5	0.120273	0
26696	PIK3IP1	1-147-10-0-0	5	0.120273	0
26834	AL021707.1	1-147-10-0-0	5	0.120273	0
9817	Z99496.2_flip	1-133-1-0-0	5	0.0525352	0.238614
12425	RHPN1_flip	1-133-1-0-0	5	0.0525352	0.238614
17319	MTERF2_flip	1-133-1-0-0	5	0.0525352	0.238614
22659	AC015923.1_flip	1-133-1-0-0	5	0.0525352	0.238614
24799	ZNF576_flip	1-133-1-0-0	5	0.0525352	0.238614
4941	AZI2_flip	1-131-2-0-0	5	0.679356	0
6398	PDE6B	1-131-2-0-0	5	0.679356	0
9186	PSMB8	1-131-2-0-0	5	0.679356	0
17465	MED13L_flip	1-131-2-0-0	5	0.679356	0
17770	GTF3A	1-131-2-0-0	5	0.679356	0
501	XKR8_flip	1-131-1-1-0	5	0.0789888	0
4465	AC021016.2_flip	1-131-1-1-0	5	0.0789888	0
18814	AC004846.2	1-131-1-1-0	5	0.0789888	0
19638	ALDH1A2	1-131-1-1-0	5	0.0789888	0
23892	2023-03-02	1-131-1-1-0	5	0.0789888	0
11266	COPG2	1-127-3-0-0	5	0.089202	0.261972
13828	ZNF32	1-127-3-0-0	5	0.089202	0.261972
13944	STOX1	1-127-3-0-0	5	0.089202	0.261972
13970	PPA1	1-127-3-0-0	5	0.089202	0.261972
19002	KCNK13	1-127-3-0-0	5	0.089202	0.261972
8060	REEP5	1-127-1-0-0	5	0.117832	0
9096	LST1	1-127-1-0-0	5	0.117832	0
14514	RGS10	1-127-1-0-0	5	0.117832	0
14538	C10orf88	1-127-1-0-0	5	0.117832	0
26264	IFNGR2	1-127-1-0-0	5	0.117832	0
10672	ASL	1-126-0-0-0	5	0.161828	0.233504
11846	IKBKB	1-126-0-0-0	5	0.161828	0.233504
12786	APBA1	1-126-0-0-0	5	0.161828	0.233504
18162	TNFSF13B	1-126-0-0-0	5	0.161828	0.233504
21226	ZFHX3	1-126-0-0-0	5	0.161828	0.233504
1516	NBPF20	1-124-0-1-0	5	0.0974008	0.259104
13808	ZNF37A	1-124-0-1-0	5	0.0974008	0.259104
14920	LDHA	1-124-0-1-0	5	0.0974008	0.259104
15972	CEP164	1-124-0-1-0	5	0.0974008	0.259104
26120	ZGPAT	1-124-0-1-0	5	0.0974008	0.259104
302	AKR7A2	1-123-3-0-0	5	0.0824353	0.24918
8656	MRNIP	1-123-3-0-0	5	0.0824353	0.24918
13360	ASB6	1-123-3-0-0	5	0.0824353	0.24918
15684	ALG8	1-123-3-0-0	5	0.0824353	0.24918
19398	NUSAP1	1-123-3-0-0	5	0.0824353	0.24918
8198	PPP2CA	1-123-0-1-0	5	0.128039	0.308731
9191	PSMB9_flip	1-123-0-1-0	5	0.128039	0.308731
9437	VEGFA_flip	1-123-0-1-0	5	0.128039	0.308731
13657	HSPA14_flip	1-123-0-1-0	5	0.128039	0.308731
21239	RFWD3_flip	1-123-0-1-0	5	0.128039	0.308731
116	ACOT7	1-120-2-0-0	5	0.0825646	0.233495
6010	MBNL1-AS1	1-120-2-0-0	5	0.0825646	0.233495
14096	PPIF	1-120-2-0-0	5	0.0825646	0.233495
21942	UNC119	1-120-2-0-0	5	0.0825646	0.233495
22744	SLC16A6	1-120-2-0-0	5	0.0825646	0.233495
532	YTHDF2	1-12-9-0-0	5	0.164527	0
7350	CLCN3	1-12-9-0-0	5	0.164527	0
15008	CD44	1-12-9-0-0	5	0.164527	0
18722	FUT8	1-12-9-0-0	5	0.164527	0
22892	UBE2O	1-12-9-0-0	5	0.164527	0
4678	CAPN10-DT	1-116-3-0-0	5	0.0834441	0
6680	PDS5A	1-116-3-0-0	5	0.0834441	0
8502	SPDL1	1-116-3-0-0	5	0.0834441	0
15578	LRTOMT	1-116-3-0-0	5	0.0834441	0
25834	SNHG11	1-116-3-0-0	5	0.0834441	0
2649	ERO1B_flip	1-112-1-0-1	5	0.122322	0.268587
7723	C5orf64_flip	1-112-1-0-1	5	0.122322	0.268587
12033	IL7_flip	1-112-1-0-1	5	0.122322	0.268587
14961	MPPED2_flip	1-112-1-0-1	5	0.122322	0.268587
23751	HDGFL2_flip	1-112-1-0-1	5	0.122322	0.268587
18680	HIF1A-AS3	1-11-2-0-0	5	0.0651221	0.195496
23278	AC022960.1	1-11-2-0-0	5	0.0651221	0.195496
24976	CA11	1-11-2-0-0	5	0.0651221	0.195496
25326	ZNF543	1-11-2-0-0	5	0.0651221	0.195496
27540	ATP7A	1-11-2-0-0	5	0.0651221	0.195496
1998	POU2F1	1-107-7-0-0	5	0.181406	0
6182	MCCC1	1-107-7-0-0	5	0.181406	0
7078	MCUB	1-107-7-0-0	5	0.181406	0
15217	FEN1_flip	1-107-7-0-0	5	0.181406	0
27920	RPS4Y1	1-107-7-0-0	5	0.181406	0
15222	FADS3	1-107-5-0-0	5	0.0922845	0.376874
18328	AL135999.1	1-107-5-0-0	5	0.0922845	0.376874
22476	AC091180.5	1-107-5-0-0	5	0.0922845	0.376874
22558	AC007114.2	1-107-5-0-0	5	0.0922845	0.376874
26796	AL022311.1	1-107-5-0-0	5	0.0922845	0.376874
2067	AL031599.1_flip	1-107-4-0-0	5	0.196511	0
8408	RBM22	1-107-4-0-0	5	0.196511	0
16141	ST3GAL4_flip	1-107-4-0-0	5	0.196511	0
20181	POLR3K_flip	1-107-4-0-0	5	0.196511	0
25524	CDS2	1-107-4-0-0	5	0.196511	0
768	AC098484.4	1-106-0-0-0	5	0.0783006	0
9858	PTPRK	1-106-0-0-0	5	0.0783006	0
11918	IMPAD1	1-106-0-0-0	5	0.0783006	0
12744	ZBTB5	1-106-0-0-0	5	0.0783006	0
16530	SSPN	1-106-0-0-0	5	0.0783006	0
2985	PPP1CB_flip	1-105-7-0-0	5	0.150667	0
4933	NEK10_flip	1-105-7-0-0	5	0.150667	0
7579	WDR70_flip	1-105-7-0-0	5	0.150667	0
9987	PLAGL1_flip	1-105-7-0-0	5	0.150667	0
25309	ZNF667_flip	1-105-7-0-0	5	0.150667	0
14779	APBB1_flip	1-0-0-0-0	5	0.0668136	0
18379	NOP9_flip	1-0-0-0-0	5	0.0668136	0
21285	GCSH_flip	1-0-0-0-0	5	0.0668136	0
21327	C16orf74_flip	1-0-0-0-0	5	0.0668136	0
24463	GPATCH1_flip	1-0-0-0-0	5	0.0668136	0
2154	RGS16	1-98-1-0-0	4	0.0401797	0.125387
3054	AC007390.2	1-98-1-0-0	4	0.0401797	0.125387
6444	TMEM129	1-98-1-0-0	4	0.0401797	0.125387
20302	PGP	1-98-1-0-0	4	0.0401797	0.125387
14478	FAM160B1	1-86-5-0-0	4	0.142817	0.370785
16572	IPO8	1-86-5-0-0	4	0.142817	0.370785
18536	ATL1	1-86-5-0-0	4	0.142817	0.370785
26314	AP000704.1	1-86-5-0-0	4	0.142817	0.370785
5250	U73166.1	1-86-4-0-0	4	0.0782652	0.260125
12064	RALYL	1-86-4-0-0	4	0.0782652	0.260125
12190	ANKRD46	1-86-4-0-0	4	0.0782652	0.260125
26022	GCNT7	1-86-4-0-0	4	0.0782652	0.260125
1877	FCRL6_flip	1-85-6-0-0	4	0.0940916	0.184646
9585	AL359715.1_flip	1-85-6-0-0	4	0.0940916	0.184646
12627	DDX58_flip	1-85-6-0-0	4	0.0940916	0.184646
22083	PSMD11_flip	1-85-6-0-0	4	0.0940916	0.184646
8725	TUBB2A_flip	1-85-4-0-0	4	0.0697453	0
8781	HULC_flip	1-85-4-0-0	4	0.0697453	0
14883	SPON1-AS1_flip	1-85-4-0-0	4	0.0697453	0
26939	NDUFA6_flip	1-85-4-0-0	4	0.0697453	0
13850	AGAP9	1-85-3-0-0	4	0.0572359	0.271987
14210	PLCE1	1-85-3-0-0	4	0.0572359	0.271987
17476	RNFT2	1-85-3-0-0	4	0.0572359	0.271987
20028	AC012291.3	1-85-3-0-0	4	0.0572359	0.271987
14188	TNKS2	1-82-1-0-0	4	0.13375	0.188573
17696	CHFR	1-82-1-0-0	4	0.13375	0.188573
25812	SAMHD1	1-82-1-0-0	4	0.13375	0.188573
26370	NDUFV3	1-82-1-0-0	4	0.13375	0.188573
14179	LINC01375_flip	1-8-8-0-0	4	0.12202	0.293154
17755	MTMR6_flip	1-8-8-0-0	4	0.12202	0.293154
20617	POLR3E_flip	1-8-8-0-0	4	0.12202	0.293154
26673	CCDC157_flip	1-8-8-0-0	4	0.12202	0.293154
12516	AL928970.1	1-78-8-0-0	4	0.0211672	0.17461
13324	PKN3	1-78-8-0-0	4	0.0211672	0.17461
20886	AC007494.2	1-78-8-0-0	4	0.0211672	0.17461
23700	DOHH	1-78-8-0-0	4	0.0211672	0.17461
10384	KLHL7	1-76-2-0-0	4	0.176444	0.31852
10918	NPTX2	1-76-2-0-0	4	0.176444	0.31852
23034	MAFG	1-76-2-0-0	4	0.176444	0.31852
27100	CSF2RA	1-76-2-0-0	4	0.176444	0.31852
5808	EFCAB12	1-732-0-0-0	4	0.035037	0
15952	APOA1	1-732-0-0-0	4	0.035037	0
20144	AC022523.1	1-732-0-0-0	4	0.035037	0
26836	AL021707.6	1-732-0-0-0	4	0.035037	0
5893	DBR1_flip	1-72-1-0-1	4	0.0521454	0.246387
18639	AL139021.1_flip	1-72-1-0-1	4	0.0521454	0.246387
21367	AC134312.1_flip	1-72-1-0-1	4	0.0521454	0.246387
23377	C18orf32_flip	1-72-1-0-1	4	0.0521454	0.246387
3795	TMEM185B_flip	1-72-0-0-0	4	0.0439735	0.140468
5645	ZBTB20-AS2_flip	1-72-0-0-0	4	0.0439735	0.140468
12671	SIGMAR1_flip	1-72-0-0-0	4	0.0439735	0.140468
15523	ALDH3B1_flip	1-72-0-0-0	4	0.0439735	0.140468
574	EIF3I	1-68-0-1-0	4	0.0863263	0.327654
610	AL513327.1	1-68-0-1-0	4	0.0863263	0.327654
1494	NBPF26	1-68-0-1-0	4	0.0863263	0.327654
1700	CHTOP	1-68-0-1-0	4	0.0863263	0.327654
5400	C3orf67	1-64-4-0-0	4	0.142963	0.150203
16956	MARS	1-64-4-0-0	4	0.142963	0.150203
18038	PCDH9-AS2	1-64-4-0-0	4	0.142963	0.150203
19228	CYFIP1	1-64-4-0-0	4	0.142963	0.150203
9354	TFEB	1-64-2-0-0	4	0.115865	0.496805
12714	AL133410.1	1-64-2-0-0	4	0.115865	0.496805
20068	ANPEP	1-64-2-0-0	4	0.115865	0.496805
20104	FES	1-64-2-0-0	4	0.115865	0.496805
3652	RPL31	1-63-0-0-0	4	0.198933	0.360621
6214	EIF4G1	1-63-0-0-0	4	0.198933	0.360621
19852	CLK3	1-63-0-0-0	4	0.198933	0.360621
21584	PFN1	1-63-0-0-0	4	0.198933	0.360621
11356	PARP12	1-6-2-0-0	4	0.0985272	0.419441
12282	MRPL13	1-6-2-0-0	4	0.0985272	0.419441
12736	PAX5	1-6-2-0-0	4	0.0985272	0.419441
16462	PLBD1	1-6-2-0-0	4	0.0985272	0.419441
17702	ZNF84	1-6-11-0-0	4	0.14964	0.355315
19024	TRIP11	1-6-11-0-0	4	0.14964	0.355315
19646	SLTM	1-6-11-0-0	4	0.14964	0.355315
20392	NMRAL1	1-6-11-0-0	4	0.14964	0.355315
10409	C7orf31_flip	1-6-1-0-0	4	0.140038	0.34423
16111	FEZ1_flip	1-6-1-0-0	4	0.140038	0.34423
17855	UFM1_flip	1-6-1-0-0	4	0.140038	0.34423
23037	ASPSCR1_flip	1-6-1-0-0	4	0.140038	0.34423
3992	WDSUB1	1-59-4-0-0	4	0.129905	0.299604
8262	SIL1	1-59-4-0-0	4	0.129905	0.299604
12528	PUM3	1-59-4-0-0	4	0.129905	0.299604
14462	AL158212.3	1-59-4-0-0	4	0.129905	0.299604
8031	AC116428.1_flip	1-539-0-0-0	4	0.0132836	0.0456228
12159	SDC2_flip	1-539-0-0-0	4	0.0132836	0.0456228
15061	LARGE2_flip	1-539-0-0-0	4	0.0132836	0.0456228
21751	NTN1_flip	1-539-0-0-0	4	0.0132836	0.0456228
2008	ADCY10	1-538-0-0-0	4	0.0296181	0.049093
7304	RXFP1	1-538-0-0-0	4	0.0296181	0.049093
22640	AC005746.2	1-538-0-0-0	4	0.0296181	0.049093
27482	PJA1	1-538-0-0-0	4	0.0296181	0.049093
4108	SP3	1-51-5-0-0	4	0.14319	1.06687
10642	PSPH	1-51-5-0-0	4	0.14319	1.06687
22094	LIG3	1-51-5-0-0	4	0.14319	1.06687
27980	MT-ND6	1-51-5-0-0	4	0.14319	1.06687
3686	TGFBRAP1	1-50-0-0-0	4	0.0791189	0.1593
5658	ARHGAP31-AS1	1-50-0-0-0	4	0.0791189	0.1593
14012	NUDT13	1-50-0-0-0	4	0.0791189	0.1593
19834	ADPGK-AS1	1-50-0-0-0	4	0.0791189	0.1593
5800	CNBP	1-48-0-0-0	4	0.124768	0.223681
9502	KIAA1586	1-48-0-0-0	4	0.124768	0.223681
10280	RNF216	1-48-0-0-0	4	0.124768	0.223681
13148	FBXW2	1-48-0-0-0	4	0.124768	0.223681
4138	AC079305.1	1-47-4-0-0	4	0.212814	0.477146
5832	ASTE1	1-47-4-0-0	4	0.212814	0.477146
20562	COQ7	1-47-4-0-0	4	0.212814	0.477146
21720	TMEM107	1-47-4-0-0	4	0.212814	0.477146
3215	VRK2_flip	1-47-2-0-0	4	0.16748	0.271895
7691	MAP3K1_flip	1-47-2-0-0	4	0.16748	0.271895
11251	NRF1_flip	1-47-2-0-0	4	0.16748	0.271895
14813	STK33_flip	1-47-2-0-0	4	0.16748	0.271895
15534	C11orf24	1-45-1-0-0	4	0.0590441	0.210614
18232	KLHL33	1-45-1-0-0	4	0.0590441	0.210614
23212	AP005131.1	1-45-1-0-0	4	0.0590441	0.210614
24624	FAM98C	1-45-1-0-0	4	0.0590441	0.210614
432	STMN1	1-43-2-0-0	4	0.0913708	0.587171
1524	POLR3C	1-43-2-0-0	4	0.0913708	0.587171
8918	U91328.1	1-43-2-0-0	4	0.0913708	0.587171
14768	TRIM34	1-43-2-0-0	4	0.0913708	0.587171
2156	NPL	1-43-1-0-0	4	0.114915	0.218208
12704	TPM2	1-43-1-0-0	4	0.114915	0.218208
22572	SRSF1	1-43-1-0-0	4	0.114915	0.218208
26770	RAC2	1-43-1-0-0	4	0.114915	0.218208
3626	LIPT1	1-429-0-0-0	4	0.0170694	0
4606	CHRNG	1-429-0-0-0	4	0.0170694	0
9580	AL391840.3	1-429-0-0-0	4	0.0170694	0
16168	AP003025.1	1-429-0-0-0	4	0.0170694	0
2147	IER5_flip	1-4-8-0-0	4	0.182861	0.398668
17501	BICDL1_flip	1-4-8-0-0	4	0.182861	0.398668
24269	MAP1S_flip	1-4-8-0-0	4	0.182861	0.398668
25921	ZNF335_flip	1-4-8-0-0	4	0.182861	0.398668
1394	C1orf162	1-4-20-0-0	4	0.142561	0.385567
7188	TBC1D9	1-4-20-0-0	4	0.142561	0.385567
9592	IBTK	1-4-20-0-0	4	0.142561	0.385567
26294	RUNX1	1-4-20-0-0	4	0.142561	0.385567
2388	TRAF5	1-4-19-0-0	4	0.172533	0.710056
8774	BLOC1S5	1-4-19-0-0	4	0.172533	0.710056
24608	SIPA1L3	1-4-19-0-0	4	0.172533	0.710056
26018	CASS4	1-4-19-0-0	4	0.172533	0.710056
6476	NOP14	1-4-12-0-0	4	0.189942	0.451483
11358	KDM7A	1-4-12-0-0	4	0.189942	0.451483
17060	NUP107	1-4-12-0-0	4	0.189942	0.451483
22452	HOXB-AS1	1-4-12-0-0	4	0.189942	0.451483
3000	LBH	1-394-0-0-0	4	0.104106	0
13694	AL450384.2	1-394-0-0-0	4	0.104106	0
14896	C11orf58	1-394-0-0-0	4	0.104106	0
21582	RNF167	1-394-0-0-0	4	0.104106	0
4732	AC023480.1	1-39-6-0-0	4	0.0753693	0.253444
5888	IL20RB	1-39-6-0-0	4	0.0753693	0.253444
16428	LINC01252	1-39-6-0-0	4	0.0753693	0.253444
27824	MTMR1	1-39-6-0-0	4	0.0753693	0.253444
7836	POLK	1-39-2-0-0	4	0.135284	1.27342
7910	ATG10	1-39-2-0-0	4	0.135284	1.27342
19320	SPRED1	1-39-2-0-0	4	0.135284	1.27342
27822	MTM1	1-39-2-0-0	4	0.135284	1.27342
4792	AC018809.2	1-364-1-0-1	4	0.0196303	0.0366316
12716	NPR2	1-364-1-0-1	4	0.0196303	0.0366316
13884	ASAH2	1-364-1-0-1	4	0.0196303	0.0366316
16214	FKBP4	1-364-1-0-1	4	0.0196303	0.0366316
3800	AC012447.1	1-36-2-0-0	4	0.140323	0.271718
9892	AL591115.1	1-36-2-0-0	4	0.140323	0.271718
15278	WDR74	1-36-2-0-0	4	0.140323	0.271718
23768	UHRF1	1-36-2-0-0	4	0.140323	0.271718
17058	RAP1B	1-350-0-0-0	4	0.478404	0.546281
18264	CHD8	1-350-0-0-0	4	0.478404	0.546281
20434	USP7	1-350-0-0-0	4	0.478404	0.546281
25054	NUP62	1-350-0-0-0	4	0.478404	0.546281
18562	GPR137C	1-348-0-0-0	4	0.0815682	0.18819
22426	TBKBP1	1-348-0-0-0	4	0.0815682	0.18819
25424	MZF1	1-348-0-0-0	4	0.0815682	0.18819
26990	NUP50	1-348-0-0-0	4	0.0815682	0.18819
2660	RYR2	1-341-1-0-0	4	0.0154652	0.0431658
10224	AC091729.3	1-341-1-0-0	4	0.0154652	0.0431658
12814	C9orf40	1-341-1-0-0	4	0.0154652	0.0431658
14764	TRIM68	1-341-1-0-0	4	0.0154652	0.0431658
3134	ATP6V1E2	1-276-1-0-0	4	0.0700848	0.167448
14638	LINC01001	1-276-1-0-0	4	0.0700848	0.167448
16486	DERA	1-276-1-0-0	4	0.0700848	0.167448
25352	ZNF211	1-276-1-0-0	4	0.0700848	0.167448
2339	RAB7B_flip	1-269-0-1-0	4	0.070931	0.21218
6363	PIGZ_flip	1-269-0-1-0	4	0.070931	0.21218
17127	PAWR_flip	1-269-0-1-0	4	0.070931	0.21218
27395	GSPT2_flip	1-269-0-1-0	4	0.070931	0.21218
1648	CDC42SE1	1-269-0-0-0	4	0.0998591	0.17059
9654	MANEA-DT	1-269-0-0-0	4	0.0998591	0.17059
12182	COX6C	1-269-0-0-0	4	0.0998591	0.17059
16752	SMARCD1	1-269-0-0-0	4	0.0998591	0.17059
15427	AP5B1_flip	1-258-1-0-0	4	0.101115	0.232688
16979	METTL1_flip	1-258-1-0-0	4	0.101115	0.232688
22857	SAP30BP_flip	1-258-1-0-0	4	0.101115	0.232688
27933	TBL1Y_flip	1-258-1-0-0	4	0.101115	0.232688
2643	B3GALNT2_flip	1-252-0-0-0	4	0.122256	0.242596
8215	DDX46_flip	1-252-0-0-0	4	0.122256	0.242596
9349	TREM1_flip	1-252-0-0-0	4	0.122256	0.242596
21165	AARS_flip	1-252-0-0-0	4	0.122256	0.242596
2774	ID2	1-251-0-0-0	4	0.171984	0.449619
8654	SQSTM1	1-251-0-0-0	4	0.171984	0.449619
17490	PEBP1	1-251-0-0-0	4	0.171984	0.449619
23596	NDUFS7	1-251-0-0-0	4	0.171984	0.449619
7762	CD180	1-239-2-0-0	4	0.0794945	0.283134
11630	INTS10	1-239-2-0-0	4	0.0794945	0.283134
17774	LNX2	1-239-2-0-0	4	0.0794945	0.283134
26636	HSCB	1-239-2-0-0	4	0.0794945	0.283134
2584	EXOC8	1-238-0-0-0	4	0.0637414	0.144512
12978	TMOD1	1-238-0-0-0	4	0.0637414	0.144512
13164	GSN-AS1	1-238-0-0-0	4	0.0637414	0.144512
14030	MSS51	1-238-0-0-0	4	0.0637414	0.144512
11709	CCDC25_flip	1-230-0-0-0	4	0.137692	0.242205
16599	RESF1_flip	1-230-0-0-0	4	0.137692	0.242205
19909	PSTPIP1_flip	1-230-0-0-0	4	0.137692	0.242205
24281	ARRDC2_flip	1-230-0-0-0	4	0.137692	0.242205
11708	CCDC25	1-227-1-0-0	4	0.137692	0.242205
16598	RESF1	1-227-1-0-0	4	0.137692	0.242205
19908	PSTPIP1	1-227-1-0-0	4	0.137692	0.242205
24280	ARRDC2	1-227-1-0-0	4	0.137692	0.242205
1503	SRGAP2-AS1_flip	1-222-2-0-0	4	0.0496133	0.216464
21859	MYO15A_flip	1-222-2-0-0	4	0.0496133	0.216464
24045	ZNF709_flip	1-222-2-0-0	4	0.0496133	0.216464
25559	AL050403.2_flip	1-222-2-0-0	4	0.0496133	0.216464
2467	AL392172.2_flip	1-222-0-0-0	4	0.127935	0.254397
11073	PSMC2_flip	1-222-0-0-0	4	0.127935	0.254397
16635	AC090630.1_flip	1-222-0-0-0	4	0.127935	0.254397
23155	RAB12_flip	1-222-0-0-0	4	0.127935	0.254397
1295	SLC30A7_flip	1-216-1-0-0	4	0.109225	0.373195
12247	ENY2_flip	1-216-1-0-0	4	0.109225	0.373195
21255	GABARAPL2_flip	1-216-1-0-0	4	0.109225	0.373195
21533	EMC6_flip	1-216-1-0-0	4	0.109225	0.373195
3046	GPATCH11	1-214-2-0-0	4	0.0651208	0.20306
17978	ARL11	1-214-2-0-0	4	0.0651208	0.20306
22334	TMUB2	1-214-2-0-0	4	0.0651208	0.20306
25256	TMEM86B	1-214-2-0-0	4	0.0651208	0.20306
5945	U2SURP_flip	1-20-3-0-0	4	0.158716	0.378476
9563	COX7A2_flip	1-20-3-0-0	4	0.158716	0.378476
12895	NFIL3_flip	1-20-3-0-0	4	0.158716	0.378476
21783	AC005224.2_flip	1-20-3-0-0	4	0.158716	0.378476
2516	PARP1	1-2-3-0-0	4	0.0890587	0.376021
17196	AC073655.1	1-2-3-0-0	4	0.0890587	0.376021
18222	CCNB1IP1	1-2-3-0-0	4	0.0890587	0.376021
20234	AL023882.1	1-2-3-0-0	4	0.0890587	0.376021
2176	TSEN15	1-2-13-0-0	4	0.110976	0.296391
2902	DTNB	1-2-13-0-0	4	0.110976	0.296391
6944	KLHL8	1-2-13-0-0	4	0.110976	0.296391
23236	AC090912.1	1-2-13-0-0	4	0.110976	0.296391
5610	NEPRO	1-2-11-0-0	4	0.143896	0.355105
7150	SCLT1	1-2-11-0-0	4	0.143896	0.355105
12070	E2F5	1-2-11-0-0	4	0.143896	0.355105
22266	AC067852.3	1-2-11-0-0	4	0.143896	0.355105
10114	EZR-AS1	1-194-1-0-0	4	0.0630133	0.253754
20690	SGF29	1-194-1-0-0	4	0.0630133	0.253754
24234	ABHD8	1-194-1-0-0	4	0.0630133	0.253754
26006	TSHZ2	1-194-1-0-0	4	0.0630133	0.253754
10836	AC003991.1	1-183-1-0-0	4	0.0923545	0.208297
21490	SERPINF1	1-183-1-0-0	4	0.0923545	0.208297
21972	AC010761.2	1-183-1-0-0	4	0.0923545	0.208297
26214	CYYR1-AS1	1-183-1-0-0	4	0.0923545	0.208297
3024	AL133243.2	1-183-0-1-0	4	0.0717278	0.755047
5742	MYLK	1-183-0-1-0	4	0.0717278	0.755047
10178	C6orf120	1-183-0-1-0	4	0.0717278	0.755047
18770	AL133445.2	1-183-0-1-0	4	0.0717278	0.755047
43	MRPL20-AS1_flip	1-183-0-0-0	4	0.074644	0.218534
1989	FAM78B_flip	1-183-0-0-0	4	0.074644	0.218534
8337	HDAC3_flip	1-183-0-0-0	4	0.074644	0.218534
21351	ZCCHC14_flip	1-183-0-0-0	4	0.074644	0.218534
2838	SMC6	1-18-7-0-0	4	0.158124	0.253644
4866	EAF1	1-18-7-0-0	4	0.158124	0.253644
7932	TMEM161B	1-18-7-0-0	4	0.158124	0.253644
19304	GOLGA8A	1-18-7-0-0	4	0.158124	0.253644
3650	NPAS2	1-176-1-0-0	4	0.106845	0.202453
10828	SLC25A40	1-176-1-0-0	4	0.106845	0.202453
15736	HIKESHI	1-176-1-0-0	4	0.106845	0.202453
18214	CDC16	1-176-1-0-0	4	0.106845	0.202453
4626	AC097713.1	1-175-1-0-0	4	0.0854513	0.295055
23098	AP000845.1	1-175-1-0-0	4	0.0854513	0.295055
25546	PAK5	1-175-1-0-0	4	0.0854513	0.295055
25868	TOX2	1-175-1-0-0	4	0.0854513	0.295055
6360	NCBP2AS2	1-169-0-0-0	4	0.0835225	0.149246
24910	AP2S1	1-169-0-0-0	4	0.0835225	0.149246
24988	NUCB1-AS1	1-169-0-0-0	4	0.0835225	0.149246
25470	NOP56	1-169-0-0-0	4	0.0835225	0.149246
1022	ITGB3BP	1-165-2-0-0	4	0.140154	0.213345
3286	AFTPH	1-165-2-0-0	4	0.140154	0.213345
9322	CCDC167	1-165-2-0-0	4	0.140154	0.213345
16762	LARP4	1-165-2-0-0	4	0.140154	0.213345
7300	GASK1B	1-16-6-0-0	4	0.0873977	0.235486
8636	ZNF879	1-16-6-0-0	4	0.0873977	0.235486
13778	EPC1	1-16-6-0-0	4	0.0873977	0.235486
17524	POP5	1-16-6-0-0	4	0.0873977	0.235486
3274	UGP2	1-16-0-0-0	4	0.111366	0.203428
5154	PTPN23	1-16-0-0-0	4	0.111366	0.203428
22810	MRPL58	1-16-0-0-0	4	0.111366	0.203428
27080	CHKB	1-16-0-0-0	4	0.111366	0.203428
11864	FNTA	1-154-1-0-0	4	0.106123	0.243322
15130	CLP1	1-154-1-0-0	4	0.106123	0.243322
20522	MARF1	1-154-1-0-0	4	0.106123	0.243322
26752	TXN2	1-154-1-0-0	4	0.106123	0.243322
4210	COL5A2	1-150-3-0-0	4	0.0868996	0.359432
5048	ZNF619	1-150-3-0-0	4	0.0868996	0.359432
11640	XPO7	1-150-3-0-0	4	0.0868996	0.359432
27630	RADX	1-150-3-0-0	4	0.0868996	0.359432
6	LINC01128	1-147-4-0-0	4	0.145755	0.256046
1332	TAF13	1-147-4-0-0	4	0.145755	0.256046
18342	PSME1	1-147-4-0-0	4	0.145755	0.256046
19692	USP3-AS1	1-147-4-0-0	4	0.145755	0.256046
20	C1orf159	1-144-3-0-0	4	0.174168	0.266825
2718	ZNF124	1-144-3-0-0	4	0.174168	0.266825
2878	FAM228B	1-144-3-0-0	4	0.174168	0.266825
14568	CTBP2	1-144-3-0-0	4	0.174168	0.266825
4854	MRPS25	1-141-5-0-0	4	0.110597	0.327797
8624	HNRNPAB	1-141-5-0-0	4	0.110597	0.327797
9030	TRIM39	1-141-5-0-0	4	0.110597	0.327797
19576	AC090971.2	1-141-5-0-0	4	0.110597	0.327797
4734	SETMAR	1-141-0-1-0	4	0.163078	0.530085
9464	TNFRSF21	1-141-0-1-0	4	0.163078	0.530085
23656	TMPRSS9	1-141-0-1-0	4	0.163078	0.530085
24650	NFKBIB	1-141-0-1-0	4	0.163078	0.530085
405	RUNX3_flip	1-141-0-0-0	4	0.0906118	0.378633
4505	ANKZF1_flip	1-141-0-0-0	4	0.0906118	0.378633
13967	TYSND1_flip	1-141-0-0-0	4	0.0906118	0.378633
16831	SP1_flip	1-141-0-0-0	4	0.0906118	0.378633
18516	AL627171.1	1-135-2-0-0	4	0.186507	0.319685
19998	WHAMM	1-135-2-0-0	4	0.186507	0.319685
22472	ZNF652	1-135-2-0-0	4	0.186507	0.319685
27132	PUDP	1-135-2-0-0	4	0.186507	0.319685
9147	ATF6B_flip	1-135-0-0-0	4	0.0993921	0.364207
11885	AC064807.1_flip	1-135-0-0-0	4	0.0993921	0.364207
21347	MAP1LC3B_flip	1-135-0-0-0	4	0.0993921	0.364207
26847	APOBEC3F_flip	1-135-0-0-0	4	0.0993921	0.364207
15996	ATP5MG	1-133-4-0-0	4	0.179205	0.26224
16746	TMBIM6	1-133-4-0-0	4	0.179205	0.26224
21862	ALKBH5	1-133-4-0-0	4	0.179205	0.26224
24170	RASAL3	1-133-4-0-0	4	0.179205	0.26224
7125	BBS7_flip	1-133-2-0-0	4	0.065338	0.207372
11245	TSPAN33_flip	1-133-2-0-0	4	0.065338	0.207372
23059	LINC01970_flip	1-133-2-0-0	4	0.065338	0.207372
25633	CD93_flip	1-133-2-0-0	4	0.065338	0.207372
10963	MCM7_flip	1-131-0-0-1	4	0.0971079	0.275995
11719	ZNF395_flip	1-131-0-0-1	4	0.0971079	0.275995
15575	IL18BP_flip	1-131-0-0-1	4	0.0971079	0.275995
23453	ZCCHC2_flip	1-131-0-0-1	4	0.0971079	0.275995
3074	HNRNPLL	1-127-5-0-0	4	0.0780964	0.211925
6080	PPM1L	1-127-5-0-0	4	0.0780964	0.211925
12344	CCDC26	1-127-5-0-0	4	0.0780964	0.211925
25194	OSCAR	1-127-5-0-0	4	0.0780964	0.211925
6440	AC016773.1	1-124-1-0-1	4	0.0895032	0.213698
11220	RBM28	1-124-1-0-1	4	0.0895032	0.213698
14128	WAPL	1-124-1-0-1	4	0.0895032	0.213698
19230	TUBGCP5	1-124-1-0-1	4	0.0895032	0.213698
2090	GPR52	1-120-4-0-0	4	0.0641074	0.147098
8554	THOC3	1-120-4-0-0	4	0.0641074	0.147098
11508	AC009403.1	1-120-4-0-0	4	0.0641074	0.147098
22256	GHDC	1-120-4-0-0	4	0.0641074	0.147098
3246	USP34	1-120-3-0-0	4	0.140933	0.306994
8880	CDKAL1	1-120-3-0-0	4	0.140933	0.306994
9314	PIM1	1-120-3-0-0	4	0.140933	0.306994
19084	ATG2B	1-120-3-0-0	4	0.140933	0.306994
10766	MDH2	1-120-1-0-0	4	0.104715	0.273661
11568	PRAG1	1-120-1-0-0	4	0.104715	0.273661
14710	DUSP8	1-120-1-0-0	4	0.104715	0.273661
15744	PRSS23	1-120-1-0-0	4	0.104715	0.273661
8023	EFNA5_flip	1-12-7-0-0	4	0.0480693	0.236672
8927	HIST1H2BC_flip	1-12-7-0-0	4	0.0480693	0.236672
10593	AC004854.2_flip	1-12-7-0-0	4	0.0480693	0.236672
21081	AC027682.4_flip	1-12-7-0-0	4	0.0480693	0.236672
858	TMEM69	1-116-1-0-0	4	0.174748	0.323023
3008	MEMO1	1-116-1-0-0	4	0.174748	0.323023
5414	ATXN7	1-116-1-0-0	4	0.174748	0.323023
27914	TMLHE	1-116-1-0-0	4	0.174748	0.323023
1388	AL390195.1	1-112-0-0-0	4	0.0742089	0.315442
7990	AC009126.1	1-112-0-0-0	4	0.0742089	0.315442
13848	NCOA4	1-112-0-0-0	4	0.0742089	0.315442
25392	AC020915.2	1-112-0-0-0	4	0.0742089	0.315442
748	CTPS1	1-110-1-0-0	4	0.113639	0.127825
2456	TAF1A	1-110-1-0-0	4	0.113639	0.127825
14932	HTATIP2	1-110-1-0-0	4	0.113639	0.127825
15524	NDUFS8	1-110-1-0-0	4	0.113639	0.127825
10214	ADAP1	1-11-3-0-0	4	0.0397546	0.200223
17466	AC012157.2	1-11-3-0-0	4	0.0397546	0.200223
20842	VKORC1	1-11-3-0-0	4	0.0397546	0.200223
22332	ASB16-AS1	1-11-3-0-0	4	0.0397546	0.200223

## Sheet: filtered_Plasmablasts_Memrary_B
	gene	clustering results	the numbers of genes	The cohesion of the last layer	The separation of the last layer
650	EPB41	1-97-0-0-0	22	0.0820735	0.0953808
1750	TRIM33	1-97-0-0-0	22	0.0820735	0.0953808
4442	MAP4K4	1-97-0-0-0	22	0.0820735	0.0953808
6138	KIF9-AS1	1-97-0-0-0	22	0.0820735	0.0953808
6608	ZBTB11	1-97-0-0-0	22	0.0820735	0.0953808
8390	CAMK2D	1-97-0-0-0	22	0.0820735	0.0953808
8608	PDGFC	1-97-0-0-0	22	0.0820735	0.0953808
9476	AC113385.1	1-97-0-0-0	22	0.0820735	0.0953808
9558	FEM1C	1-97-0-0-0	22	0.0820735	0.0953808
10134	DOCK2	1-97-0-0-0	22	0.0820735	0.0953808
10180	SFXN1	1-97-0-0-0	22	0.0820735	0.0953808
11442	TENT5A	1-97-0-0-0	22	0.0820735	0.0953808
12126	RPS6KA2	1-97-0-0-0	22	0.0820735	0.0953808
12558	VPS41	1-97-0-0-0	22	0.0820735	0.0953808
15630	TGFBR1	1-97-0-0-0	22	0.0820735	0.0953808
15794	MEGF9	1-97-0-0-0	22	0.0820735	0.0953808
16056	NUP214	1-97-0-0-0	22	0.0820735	0.0953808
16450	AL450384.2	1-97-0-0-0	22	0.0820735	0.0953808
17284	RBM20	1-97-0-0-0	22	0.0820735	0.0953808
22906	MARK3	1-97-0-0-0	22	0.0820735	0.0953808
25412	LINC01572	1-97-0-0-0	22	0.0820735	0.0953808
30354	ZNF587B	1-97-0-0-0	22	0.0820735	0.0953808
1100	FAF1	1-4-1-0-0	18	0.079577	0.109486
2904	RCOR3	1-4-1-0-0	18	0.079577	0.109486
6160	MAP4	1-4-1-0-0	18	0.079577	0.109486
7918	ATP8A1	1-4-1-0-0	18	0.079577	0.109486
8638	MSMO1	1-4-1-0-0	18	0.079577	0.109486
9052	NDUFS4	1-4-1-0-0	18	0.079577	0.109486
9156	ERBIN	1-4-1-0-0	18	0.079577	0.109486
9308	TENT2	1-4-1-0-0	18	0.079577	0.109486
10358	EXOC2	1-4-1-0-0	18	0.079577	0.109486
11426	PHIP	1-4-1-0-0	18	0.079577	0.109486
15554	MFSD14B	1-4-1-0-0	18	0.079577	0.109486
19810	ERGIC2	1-4-1-0-0	18	0.079577	0.109486
23604	CSNK1G1	1-4-1-0-0	18	0.079577	0.109486
24438	ALG1	1-4-1-0-0	18	0.079577	0.109486
29260	LSM14A	1-4-1-0-0	18	0.079577	0.109486
29450	ZNF573	1-4-1-0-0	18	0.079577	0.109486
31578	AGPAT3	1-4-1-0-0	18	0.079577	0.109486
32344	NUP50	1-4-1-0-0	18	0.079577	0.109486
6142	KLHL18	1-118-0-0-0	16	0.0934421	0.139237
9766	HNRNPA0	1-118-0-0-0	16	0.0934421	0.139237
11892	HECA	1-118-0-0-0	16	0.0934421	0.139237
16504	YME1L1	1-118-0-0-0	16	0.0934421	0.139237
27144	PPM1D	1-118-0-0-0	16	0.0934421	0.139237
27892	AC011825.4	1-118-0-0-0	16	0.0934421	0.139237
28580	HNRNPM	1-118-0-0-0	16	0.0934421	0.139237
28808	AC092069.1	1-118-0-0-0	16	0.0934421	0.139237
29178	ZNF257	1-118-0-0-0	16	0.0934421	0.139237
29956	BCL2L12	1-118-0-0-0	16	0.0934421	0.139237
30824	SPAG4	1-118-0-0-0	16	0.0934421	0.139237
30996	ZNF335	1-118-0-0-0	16	0.0934421	0.139237
31438	SON	1-118-0-0-0	16	0.0934421	0.139237
32110	NOL12	1-118-0-0-0	16	0.0934421	0.139237
32630	SAT1	1-118-0-0-0	16	0.0934421	0.139237
32868	FAM104B	1-118-0-0-0	16	0.0934421	0.139237
2920	INTS7	1-2-0-0-0	14	0.0697495	0.110276
6804	SLC15A2	1-2-0-0-0	14	0.0697495	0.110276
7964	SGCB	1-2-0-0-0	14	0.0697495	0.110276
9422	TTC37	1-2-0-0-0	14	0.0697495	0.110276
14014	NUGGC	1-2-0-0-0	14	0.0697495	0.110276
18642	NADSYN1	1-2-0-0-0	14	0.0697495	0.110276
19252	TMEM218	1-2-0-0-0	14	0.0697495	0.110276
20964	TAOK3	1-2-0-0-0	14	0.0697495	0.110276
21404	COG6	1-2-0-0-0	14	0.0697495	0.110276
21518	FNDC3A	1-2-0-0-0	14	0.0697495	0.110276
21574	VPS36	1-2-0-0-0	14	0.0697495	0.110276
24122	LRRK1	1-2-0-0-0	14	0.0697495	0.110276
30530	MAVS	1-2-0-0-0	14	0.0697495	0.110276
31092	ZFP64	1-2-0-0-0	14	0.0697495	0.110276
580	SLC9A1	1-79-1-0-0	13	0.0526111	0.0745208
956	TMEM269	1-79-1-0-0	13	0.0526111	0.0745208
3618	NRBP1	1-79-1-0-0	13	0.0526111	0.0745208
4568	AC110769.2	1-79-1-0-0	13	0.0526111	0.0745208
9670	SLC22A5	1-79-1-0-0	13	0.0526111	0.0745208
12098	ACAT2	1-79-1-0-0	13	0.0526111	0.0745208
13356	CCDC136	1-79-1-0-0	13	0.0526111	0.0745208
15204	UBAP1	1-79-1-0-0	13	0.0526111	0.0745208
15326	ALDH1B1	1-79-1-0-0	13	0.0526111	0.0745208
17202	CUEDC2	1-79-1-0-0	13	0.0526111	0.0745208
19654	DDX47	1-79-1-0-0	13	0.0526111	0.0745208
27076	SRSF1	1-79-1-0-0	13	0.0526111	0.0745208
32214	AL022238.2	1-79-1-0-0	13	0.0526111	0.0745208
226	UBE4B	1-4-3-0-0	13	0.0778598	0.100565
2022	PIP5K1A	1-4-3-0-0	13	0.0778598	0.100565
6462	AC104162.2	1-4-3-0-0	13	0.0778598	0.100565
6696	CFAP44	1-4-3-0-0	13	0.0778598	0.100565
6970	ACAD11	1-4-3-0-0	13	0.0778598	0.100565
7866	TMEM156	1-4-3-0-0	13	0.0778598	0.100565
8202	AFF1	1-4-3-0-0	13	0.0778598	0.100565
11400	MTO1	1-4-3-0-0	13	0.0778598	0.100565
14332	SGK3	1-4-3-0-0	13	0.0778598	0.100565
14668	NUDCD1	1-4-3-0-0	13	0.0778598	0.100565
20742	WASHC4	1-4-3-0-0	13	0.0778598	0.100565
25202	CBFB	1-4-3-0-0	13	0.0778598	0.100565
32282	NDUFA6-DT	1-4-3-0-0	13	0.0778598	0.100565
1518	DPYD	1-10-3-0-0	13	0.0818899	0.143107
3322	OR2L5	1-10-3-0-0	13	0.0818899	0.143107
8484	TBC1D9	1-10-3-0-0	13	0.0818899	0.143107
11306	EFHC1	1-10-3-0-0	13	0.0818899	0.143107
11370	FAM135A	1-10-3-0-0	13	0.0818899	0.143107
12482	ZNRF2	1-10-3-0-0	13	0.0818899	0.143107
13270	MDFIC	1-10-3-0-0	13	0.0818899	0.143107
16826	CFAP70	1-10-3-0-0	13	0.0818899	0.143107
18796	LINC02728	1-10-3-0-0	13	0.0818899	0.143107
21522	CAB39L	1-10-3-0-0	13	0.0818899	0.143107
21666	UGGT2	1-10-3-0-0	13	0.0818899	0.143107
31510	BRWD1	1-10-3-0-0	13	0.0818899	0.143107
32980	HDAC8	1-10-3-0-0	13	0.0818899	0.143107
1592	AKNAD1	1-68-0-0-0	12	0.0584042	0.139077
6606	PCNP	1-68-0-0-0	12	0.0584042	0.139077
7032	MRPS22	1-68-0-0-0	12	0.0584042	0.139077
7836	STIM2	1-68-0-0-0	12	0.0584042	0.139077
11032	NUDT3	1-68-0-0-0	12	0.0584042	0.139077
11048	TAF11	1-68-0-0-0	12	0.0584042	0.139077
13752	ZNF596	1-68-0-0-0	12	0.0584042	0.139077
17268	XPNPEP1	1-68-0-0-0	12	0.0584042	0.139077
21398	PROSER1	1-68-0-0-0	12	0.0584042	0.139077
27930	ELP2	1-68-0-0-0	12	0.0584042	0.139077
32684	MED14OS	1-68-0-0-0	12	0.0584042	0.139077
33540	AC010889.2	1-68-0-0-0	12	0.0584042	0.139077
4435	RPL31_flip	1-10-0-0-0	12	0.0883171	0.138318
5885	RPL15_flip	1-10-0-0-0	12	0.0883171	0.138318
9359	COX7C_flip	1-10-0-0-0	12	0.0883171	0.138318
11065	RPL10A_flip	1-10-0-0-0	12	0.0883171	0.138318
14373	RPL7_flip	1-10-0-0-0	12	0.0883171	0.138318
20213	RPS26_flip	1-10-0-0-0	12	0.0883171	0.138318
26039	RPL26_flip	1-10-0-0-0	12	0.0883171	0.138318
26591	RPL19_flip	1-10-0-0-0	12	0.0883171	0.138318
29881	RPL18_flip	1-10-0-0-0	12	0.0883171	0.138318
30405	RPS5_flip	1-10-0-0-0	12	0.0883171	0.138318
32721	NDUFB11_flip	1-10-0-0-0	12	0.0883171	0.138318
33075	RPL36A_flip	1-10-0-0-0	12	0.0883171	0.138318
1114	EPS15	1-0-0-0-0	12	0.0721793	0.414371
3814	THADA	1-0-0-0-0	12	0.0721793	0.414371
4152	MOB1A	1-0-0-0-0	12	0.0721793	0.414371
5048	FSIP2-AS1	1-0-0-0-0	12	0.0721793	0.414371
6532	LINC02018	1-0-0-0-0	12	0.0721793	0.414371
8128	BMP2K	1-0-0-0-0	12	0.0721793	0.414371
11346	PRIM2	1-0-0-0-0	12	0.0721793	0.414371
14280	RAB2A	1-0-0-0-0	12	0.0721793	0.414371
21318	PAN3	1-0-0-0-0	12	0.0721793	0.414371
27146	BCAS3	1-0-0-0-0	12	0.0721793	0.414371
28104	RTTN	1-0-0-0-0	12	0.0721793	0.414371
30922	CHD6	1-0-0-0-0	12	0.0721793	0.414371
7640	FAM193A	1-2-7-0-0	11	0.0683631	0.0969878
9650	AC008679.1	1-2-7-0-0	11	0.0683631	0.0969878
17288	PDCD4	1-2-7-0-0	11	0.0683631	0.0969878
21092	VPS37B	1-2-7-0-0	11	0.0683631	0.0969878
23312	PPIP5K1	1-2-7-0-0	11	0.0683631	0.0969878
24854	GDPD3	1-2-7-0-0	11	0.0683631	0.0969878
25268	PSKH1	1-2-7-0-0	11	0.0683631	0.0969878
27164	TLK2	1-2-7-0-0	11	0.0683631	0.0969878
28422	TNFAIP8L1	1-2-7-0-0	11	0.0683631	0.0969878
31912	PITPNB	1-2-7-0-0	11	0.0683631	0.0969878
33226	UPF3B	1-2-7-0-0	11	0.0683631	0.0969878
3418	AC104794.3	1-147-0-0-0	11	0.0595629	1.03317
5342	FN1	1-147-0-0-0	11	0.0595629	1.03317
9474	LINC02062	1-147-0-0-0	11	0.0595629	1.03317
11394	OOEP	1-147-0-0-0	11	0.0595629	1.03317
12216	SNX8	1-147-0-0-0	11	0.0595629	1.03317
14182	SMIM19	1-147-0-0-0	11	0.0595629	1.03317
21320	FLT1	1-147-0-0-0	11	0.0595629	1.03317
28232	FAM174C	1-147-0-0-0	11	0.0595629	1.03317
28708	EPOR	1-147-0-0-0	11	0.0595629	1.03317
31514	HMGN1	1-147-0-0-0	11	0.0595629	1.03317
32960	NONO	1-147-0-0-0	11	0.0595629	1.03317
1048	NASP	1-119-1-0-0	11	0.12597	0.186824
3770	SRSF7	1-119-1-0-0	11	0.12597	0.186824
6188	IP6K2	1-119-1-0-0	11	0.12597	0.186824
17876	SPTY2D1	1-119-1-0-0	11	0.12597	0.186824
20134	PCBP2	1-119-1-0-0	11	0.12597	0.186824
22416	ARG2	1-119-1-0-0	11	0.12597	0.186824
22456	SRSF5	1-119-1-0-0	11	0.12597	0.186824
25736	YWHAE	1-119-1-0-0	11	0.12597	0.186824
29742	FOSB	1-119-1-0-0	11	0.12597	0.186824
30230	UBE2S	1-119-1-0-0	11	0.12597	0.186824
30834	RBM39	1-119-1-0-0	11	0.12597	0.186824
4862	COBLL1	1-0-1-0-0	11	0.0782279	0.120636
5054	LINC01473	1-0-1-0-0	11	0.0782279	0.120636
8636	KLHL2	1-0-1-0-0	11	0.0782279	0.120636
11460	CYB5R4	1-0-1-0-0	11	0.0782279	0.120636
11516	ANKRD6	1-0-1-0-0	11	0.0782279	0.120636
14232	TCEA1	1-0-1-0-0	11	0.0782279	0.120636
15132	FOCAD	1-0-1-0-0	11	0.0782279	0.120636
16984	LINC01374	1-0-1-0-0	11	0.0782279	0.120636
17306	VTI1A	1-0-1-0-0	11	0.0782279	0.120636
20734	CHST11	1-0-1-0-0	11	0.0782279	0.120636
28124	ZNF407	1-0-1-0-0	11	0.0782279	0.120636
8444	JADE1	1-79-0-0-0	10	0.0574824	0.0818198
9418	MCTP1	1-79-0-0-0	10	0.0574824	0.0818198
11846	PDE7B	1-79-0-0-0	10	0.0574824	0.0818198
13588	AC005229.4	1-79-0-0-0	10	0.0574824	0.0818198
13792	PRAG1	1-79-0-0-0	10	0.0574824	0.0818198
17316	TCF7L2	1-79-0-0-0	10	0.0574824	0.0818198
18730	XRRA1	1-79-0-0-0	10	0.0574824	0.0818198
31216	TCFL5	1-79-0-0-0	10	0.0574824	0.0818198
32204	GRAP2	1-79-0-0-0	10	0.0574824	0.0818198
33084	ARMCX3	1-79-0-0-0	10	0.0574824	0.0818198
512	RSRP1	1-67-1-0-0	10	0.0886516	0.12239
3102	GJC2	1-67-1-0-0	10	0.0886516	0.12239
9214	BDP1	1-67-1-0-0	10	0.0886516	0.12239
18378	EHD1	1-67-1-0-0	10	0.0886516	0.12239
21648	MIR17HG	1-67-1-0-0	10	0.0886516	0.12239
25150	GINS3	1-67-1-0-0	10	0.0886516	0.12239
26964	AC091180.5	1-67-1-0-0	10	0.0886516	0.12239
29496	SIRT2	1-67-1-0-0	10	0.0886516	0.12239
32600	PDHA1	1-67-1-0-0	10	0.0886516	0.12239
33348	RBMX	1-67-1-0-0	10	0.0886516	0.12239
7078	SLC9A9	1-32-1-0-0	10	0.0612613	0
9354	XRCC4	1-32-1-0-0	10	0.0612613	0
11454	PGM3	1-32-1-0-0	10	0.0612613	0
14030	INTS9	1-32-1-0-0	10	0.0612613	0
15134	HACD4	1-32-1-0-0	10	0.0612613	0
17300	ACSL5	1-32-1-0-0	10	0.0612613	0
17362	CACUL1	1-32-1-0-0	10	0.0612613	0
18812	AP001767.3	1-32-1-0-0	10	0.0612613	0
21996	RIPK3	1-32-1-0-0	10	0.0612613	0
24868	NPIPB13	1-32-1-0-0	10	0.0612613	0
5594	HDAC4-AS1	1-172-0-0-0	10	0.0612419	0
5694	RAD18	1-172-0-0-0	10	0.0612419	0
10670	BTN3A1	1-172-0-0-0	10	0.0612419	0
16820	DNAJC9	1-172-0-0-0	10	0.0612419	0
18674	ARAP1	1-172-0-0-0	10	0.0612419	0
19296	KCNJ1	1-172-0-0-0	10	0.0612419	0
25790	RAP1GAP2	1-172-0-0-0	10	0.0612419	0
27850	NPC1	1-172-0-0-0	10	0.0612419	0
31048	KCNB1	1-172-0-0-0	10	0.0612419	0
32602	MAP3K15	1-172-0-0-0	10	0.0612419	0
2107	RPS27_flip	1-10-0-0-1	10	0.0696523	0.129094
5353	RPL37A_flip	1-10-0-0-1	10	0.0696523	0.129094
9347	RPS23_flip	1-10-0-0-1	10	0.0696523	0.129094
9993	RPS14_flip	1-10-0-0-1	10	0.0696523	0.129094
10987	RPS18_flip	1-10-0-0-1	10	0.0696523	0.129094
14567	RPL30_flip	1-10-0-0-1	10	0.0696523	0.129094
17749	RPL27A_flip	1-10-0-0-1	10	0.0696523	0.129094
29521	RPS16_flip	1-10-0-0-1	10	0.0696523	0.129094
29941	RPS11_flip	1-10-0-0-1	10	0.0696523	0.129094
33441	RPL10_flip	1-10-0-0-1	10	0.0696523	0.129094
1475	EVI5_flip	1-95-0-0-0	9	0.0739857	0.122326
2439	CREG1_flip	1-95-0-0-0	9	0.0739857	0.122326
3891	ERLEC1_flip	1-95-0-0-0	9	0.0739857	0.122326
14071	WRN_flip	1-95-0-0-0	9	0.0739857	0.122326
15875	PPP6C_flip	1-95-0-0-0	9	0.0739857	0.122326
17771	ZNF143_flip	1-95-0-0-0	9	0.0739857	0.122326
18179	MRPL16_flip	1-95-0-0-0	9	0.0739857	0.122326
21029	P2RX4_flip	1-95-0-0-0	9	0.0739857	0.122326
21771	CUL4A_flip	1-95-0-0-0	9	0.0739857	0.122326
566	ARID1A	1-86-0-0-0	9	0.061103	0.0855506
6850	UMPS	1-86-0-0-0	9	0.061103	0.0855506
10398	PSMG4	1-86-0-0-0	9	0.061103	0.0855506
24166	CAPN15	1-86-0-0-0	9	0.061103	0.0855506
24318	AMDHD2	1-86-0-0-0	9	0.061103	0.0855506
26418	ADAP2	1-86-0-0-0	9	0.061103	0.0855506
28458	LONP1	1-86-0-0-0	9	0.061103	0.0855506
31036	ARFGEF2	1-86-0-0-0	9	0.061103	0.0855506
31686	MICAL3	1-86-0-0-0	9	0.061103	0.0855506
5308	AC007038.1	1-60-2-0-0	9	0.0604709	0
6264	RBM5-AS1	1-60-2-0-0	9	0.0604709	0
8530	LSM6	1-60-2-0-0	9	0.0604709	0
10728	ZKSCAN8	1-60-2-0-0	9	0.0604709	0
13292	LSM8	1-60-2-0-0	9	0.0604709	0
13860	AC068587.4	1-60-2-0-0	9	0.0604709	0
15422	VPS13A	1-60-2-0-0	9	0.0604709	0
17304	ZDHHC6	1-60-2-0-0	9	0.0604709	0
20736	SLC41A2	1-60-2-0-0	9	0.0604709	0
3548	POMC	1-48-0-0-0	9	0.0424448	0
6587	AC129803.1_flip	1-48-0-0-0	9	0.0424448	0
13668	ASIC3	1-48-0-0-0	9	0.0424448	0
13954	RHOBTB2	1-48-0-0-0	9	0.0424448	0
15972	TRUB2	1-48-0-0-0	9	0.0424448	0
22222	AL365295.2	1-48-0-0-0	9	0.0424448	0
23151	FAM98B_flip	1-48-0-0-0	9	0.0424448	0
27601	ALYREF_flip	1-48-0-0-0	9	0.0424448	0
30748	AL035071.1	1-48-0-0-0	9	0.0424448	0
716	MARCKSL1	1-45-0-0-0	9	0.118372	0.248113
2788	BTG2	1-45-0-0-0	9	0.118372	0.248113
6010	CSRNP1	1-45-0-0-0	9	0.118372	0.248113
10934	HLA-DRA	1-45-0-0-0	9	0.118372	0.248113
10970	HLA-DPB1	1-45-0-0-0	9	0.118372	0.248113
20168	HNRNPA1	1-45-0-0-0	9	0.118372	0.248113
21154	UBC	1-45-0-0-0	9	0.118372	0.248113
25672	RPL13	1-45-0-0-0	9	0.118372	0.248113
29838	NOP53	1-45-0-0-0	9	0.118372	0.248113
1412	SH3GLB1	1-4-8-0-0	9	0.0787315	0.127643
4518	ANAPC1	1-4-8-0-0	9	0.0787315	0.127643
17184	ARMH3	1-4-8-0-0	9	0.0787315	0.127643
20794	CORO1C	1-4-8-0-0	9	0.0787315	0.127643
21550	RNASEH2B	1-4-8-0-0	9	0.0787315	0.127643
21696	CLYBL	1-4-8-0-0	9	0.0787315	0.127643
31326	USP25	1-4-8-0-0	9	0.0787315	0.127643
33032	BRWD3	1-4-8-0-0	9	0.0787315	0.127643
33154	RBM41	1-4-8-0-0	9	0.0787315	0.127643
4106	ZNF638	1-4-2-0-0	9	0.0650177	0.437175
6488	SUCLG2	1-4-2-0-0	9	0.0650177	0.437175
8534	SLC10A7	1-4-2-0-0	9	0.0650177	0.437175
8670	GALNT7	1-4-2-0-0	9	0.0650177	0.437175
9138	CWC27	1-4-2-0-0	9	0.0650177	0.437175
11462	AL034347.1	1-4-2-0-0	9	0.0650177	0.437175
13812	MSRA	1-4-2-0-0	9	0.0650177	0.437175
21232	ZMYM5	1-4-2-0-0	9	0.0650177	0.437175
28070	RELCH	1-4-2-0-0	9	0.0650177	0.437175
3678	AL121652.1	1-238-1-0-0	9	0.0350995	0.0655637
4104	PAIP2B	1-238-1-0-0	9	0.0350995	0.0655637
8342	RPL34-AS1	1-238-1-0-0	9	0.0350995	0.0655637
8526	C4orf51	1-238-1-0-0	9	0.0350995	0.0655637
14266	UBXN2B	1-238-1-0-0	9	0.0350995	0.0655637
17124	COX15	1-238-1-0-0	9	0.0350995	0.0655637
30092	ZNF528	1-238-1-0-0	9	0.0350995	0.0655637
30134	ZNF813	1-238-1-0-0	9	0.0350995	0.0655637
31482	MORC3	1-238-1-0-0	9	0.0350995	0.0655637
4330	LINC00342	1-2-0-1-0	9	0.0654578	0
6796	HCLS1	1-2-0-1-0	9	0.0654578	0
7946	TXK	1-2-0-1-0	9	0.0654578	0
10736	PGBD1	1-2-0-1-0	9	0.0654578	0
11424	IRAK1BP1	1-2-0-1-0	9	0.0654578	0
12182	AC073957.3	1-2-0-1-0	9	0.0654578	0
14124	AC087362.1	1-2-0-1-0	9	0.0654578	0
15980	ODF2	1-2-0-1-0	9	0.0654578	0
28016	MEX3C	1-2-0-1-0	9	0.0654578	0
950	YBX1	1-126-0-0-0	9	0.124803	0.214327
4540	SLC20A1	1-126-0-0-0	9	0.124803	0.214327
10190	SIMC1	1-126-0-0-0	9	0.124803	0.214327
10778	PPP1R10	1-126-0-0-0	9	0.124803	0.214327
11092	SRSF3	1-126-0-0-0	9	0.124803	0.214327
12994	BUD31	1-126-0-0-0	9	0.124803	0.214327
13066	TSC22D4	1-126-0-0-0	9	0.124803	0.214327
15308	POLR1E	1-126-0-0-0	9	0.124803	0.214327
31908	LINC01422	1-126-0-0-0	9	0.124803	0.214327
266	FBXO2	1-93-0-0-0	8	0.0700866	0.133639
5126	HECW2	1-93-0-0-0	8	0.0700866	0.133639
11684	HDAC2-AS2	1-93-0-0-0	8	0.0700866	0.133639
12354	AHR	1-93-0-0-0	8	0.0700866	0.133639
13502	TBXAS1	1-93-0-0-0	8	0.0700866	0.133639
19778	MED21	1-93-0-0-0	8	0.0700866	0.133639
25548	MEAK7	1-93-0-0-0	8	0.0700866	0.133639
26028	PFAS	1-93-0-0-0	8	0.0700866	0.133639
275	DRAXIN_flip	1-79-2-0-0	8	0.0170554	0.0539784
4169	WBP1_flip	1-79-2-0-0	8	0.0170554	0.0539784
7535	AC024560.5_flip	1-79-2-0-0	8	0.0170554	0.0539784
7971	LINC01618_flip	1-79-2-0-0	8	0.0170554	0.0539784
12317	AC006042.4_flip	1-79-2-0-0	8	0.0170554	0.0539784
17209	MFSD13A_flip	1-79-2-0-0	8	0.0170554	0.0539784
24531	AC130650.1_flip	1-79-2-0-0	8	0.0170554	0.0539784
27161	AC018628.2_flip	1-79-2-0-0	8	0.0170554	0.0539784
7472	ACAP2	1-4-6-0-0	8	0.0826477	0.133223
11360	PHF3	1-4-6-0-0	8	0.0826477	0.133223
11582	CRYBG1	1-4-6-0-0	8	0.0826477	0.133223
14760	MTSS1	1-4-6-0-0	8	0.0826477	0.133223
17032	TBC1D12	1-4-6-0-0	8	0.0826477	0.133223
17068	PIK3AP1	1-4-6-0-0	8	0.0826477	0.133223
21362	PDS5B	1-4-6-0-0	8	0.0826477	0.133223
33520	USP9Y	1-4-6-0-0	8	0.0826477	0.133223
8050	RUFY3	1-22-0-0-0	8	0.0700868	0.0827342
15492	AL158071.4	1-22-0-0-0	8	0.0700868	0.0827342
19372	CACNA1C	1-22-0-0-0	8	0.0700868	0.0827342
19574	CLEC12A	1-22-0-0-0	8	0.0700868	0.0827342
19752	RASSF8	1-22-0-0-0	8	0.0700868	0.0827342
20834	AC007546.1	1-22-0-0-0	8	0.0700868	0.0827342
23528	ADAM10	1-22-0-0-0	8	0.0700868	0.0827342
23920	TMC3-AS1	1-22-0-0-0	8	0.0700868	0.0827342
938	FOXJ3	1-2-6-0-0	8	0.0823745	0.102415
942	CCDC30	1-2-6-0-0	8	0.0823745	0.102415
4756	ORC4	1-2-6-0-0	8	0.0823745	0.102415
8578	TMEM154	1-2-6-0-0	8	0.0823745	0.102415
10904	SKIV2L	1-2-6-0-0	8	0.0823745	0.102415
17136	AL138921.1	1-2-6-0-0	8	0.0823745	0.102415
30410	ZNF324B	1-2-6-0-0	8	0.0823745	0.102415
31450	MRPS6	1-2-6-0-0	8	0.0823745	0.102415
4876	AC009495.3	1-170-0-0-0	8	0.0386314	0.0640602
6994	CEP63	1-170-0-0-0	8	0.0386314	0.0640602
9486	PAM	1-170-0-0-0	8	0.0386314	0.0640602
13568	EPHA1-AS1	1-170-0-0-0	8	0.0386314	0.0640602
14088	ZNF703	1-170-0-0-0	8	0.0386314	0.0640602
16684	ASAH2B	1-170-0-0-0	8	0.0386314	0.0640602
18268	UQCC3	1-170-0-0-0	8	0.0386314	0.0640602
30860	SLA2	1-170-0-0-0	8	0.0386314	0.0640602
1598	WDR47	1-119-0-0-0	8	0.0871418	0.172313
6902	RAB7A	1-119-0-0-0	8	0.0871418	0.172313
7404	EIF4A2	1-119-0-0-0	8	0.0871418	0.172313
23598	SNX1	1-119-0-0-0	8	0.0871418	0.172313
27460	SRSF2	1-119-0-0-0	8	0.0871418	0.172313
28448	SAFB2	1-119-0-0-0	8	0.0871418	0.172313
28870	DDX39A	1-119-0-0-0	8	0.0871418	0.172313
32576	SYAP1	1-119-0-0-0	8	0.0871418	0.172313
6896	EEFSEC	1-10-2-1-0	8	0.0796843	0.12181
9644	LINC01184	1-10-2-1-0	8	0.0796843	0.12181
11438	BCKDHB	1-10-2-1-0	8	0.0796843	0.12181
14380	UBE2W	1-10-2-1-0	8	0.0796843	0.12181
19890	LRRK2	1-10-2-1-0	8	0.0796843	0.12181
27978	SMAD2	1-10-2-1-0	8	0.0796843	0.12181
29072	CRTC1	1-10-2-1-0	8	0.0796843	0.12181
32916	LAS1L	1-10-2-1-0	8	0.0796843	0.12181
20506	PHLDA1	1-99-0-0-0	7	0.140359	0.205358
21468	TPT1	1-99-0-0-0	7	0.140359	0.205358
22944	SIVA1	1-99-0-0-0	7	0.140359	0.205358
27396	H3F3B	1-99-0-0-0	7	0.140359	0.205358
28386	EEF2	1-99-0-0-0	7	0.140359	0.205358
29344	NFKBID	1-99-0-0-0	7	0.140359	0.205358
30136	ZNF331	1-99-0-0-0	7	0.140359	0.205358
76	MIB2	1-94-0-0-0	7	0.0468916	0.0960634
11392	AC019205.1	1-94-0-0-0	7	0.0468916	0.0960634
14070	WRN	1-94-0-0-0	7	0.0468916	0.0960634
14346	SLCO5A1	1-94-0-0-0	7	0.0468916	0.0960634
14990	ZNF517	1-94-0-0-0	7	0.0468916	0.0960634
21028	P2RX4	1-94-0-0-0	7	0.0468916	0.0960634
23916	STARD5	1-94-0-0-0	7	0.0468916	0.0960634
3484	LAPTM4A	1-60-4-0-0	7	0.0801719	0
5816	CAPN7	1-60-4-0-0	7	0.0801719	0
11836	HBS1L	1-60-4-0-0	7	0.0801719	0
15026	RFX3	1-60-4-0-0	7	0.0801719	0
20501	AC121761.1_flip	1-60-4-0-0	7	0.0801719	0
24478	AC007014.1	1-60-4-0-0	7	0.0801719	0
31221	AL117379.1_flip	1-60-4-0-0	7	0.0801719	0
2516	GAS5	1-57-1-0-0	7	0.0899871	0
3402	IAH1	1-57-1-0-0	7	0.0899871	0
8394	SNHG8	1-57-1-0-0	7	0.0899871	0
9230	BTF3	1-57-1-0-0	7	0.0899871	0
10842	TNF	1-57-1-0-0	7	0.0899871	0
29312	FFAR1	1-57-1-0-0	7	0.0899871	0
31596	CFAP410	1-57-1-0-0	7	0.0899871	0
5968	EPM2AIP1	1-55-2-0-0	7	0.0988998	0
12732	AC006001.2	1-55-2-0-0	7	0.0988998	0
18296	WDR74	1-55-2-0-0	7	0.0988998	0
25786	PAFAH1B1	1-55-2-0-0	7	0.0988998	0
26270	WSB1	1-55-2-0-0	7	0.0988998	0
26366	NUFIP2	1-55-2-0-0	7	0.0988998	0
32046	TOM1	1-55-2-0-0	7	0.0988998	0
1600	TAF13	1-55-0-0-0	7	0.0874974	0.146346
1752	BCAS2	1-55-0-0-0	7	0.0874974	0.146346
1986	ENSA	1-55-0-0-0	7	0.0874974	0.146346
3410	YWHAQ	1-55-0-0-0	7	0.0874974	0.146346
9722	PPP2CA	1-55-0-0-0	7	0.0874974	0.146346
10296	HNRNPH1	1-55-0-0-0	7	0.0874974	0.146346
17554	RNH1	1-55-0-0-0	7	0.0874974	0.146346
5299	PTH2R_flip	1-51-4-0-0	7	0.0305567	0.0930415
11231	ABCC10_flip	1-51-4-0-0	7	0.0305567	0.0930415
24843	HIRIP3_flip	1-51-4-0-0	7	0.0305567	0.0930415
28085	AC036176.1_flip	1-51-4-0-0	7	0.0305567	0.0930415
28385	DAPK3_flip	1-51-4-0-0	7	0.0305567	0.0930415
29977	TBC1D17_flip	1-51-4-0-0	7	0.0305567	0.0930415
30429	MZF1_flip	1-51-4-0-0	7	0.0305567	0.0930415
11468	SNX14	1-4-2-1-0	7	0.0875137	0
12326	PHF14	1-4-2-1-0	7	0.0875137	0
16710	ARID5B	1-4-2-1-0	7	0.0875137	0
17898	GAS2	1-4-2-1-0	7	0.0875137	0
26880	NSF	1-4-2-1-0	7	0.0875137	0
32964	TAF1	1-4-2-1-0	7	0.0875137	0
33300	ENOX2	1-4-2-1-0	7	0.0875137	0
6826	PARP15	1-4-12-0-0	7	0.0750066	0.0967463
6968	DNAJC13	1-4-12-0-0	7	0.0750066	0.0967463
7298	MFN1	1-4-12-0-0	7	0.0750066	0.0967463
14032	HMBOX1	1-4-12-0-0	7	0.0750066	0.0967463
15068	KIAA2026	1-4-12-0-0	7	0.0750066	0.0967463
15504	SPTLC1	1-4-12-0-0	7	0.0750066	0.0967463
28370	HMG20B	1-4-12-0-0	7	0.0750066	0.0967463
736	AL031602.2	1-397-0-0-0	7	0.0417183	0
6595	LNP1_flip	1-397-0-0-0	7	0.0417183	0
9885	PCDHGA5_flip	1-397-0-0-0	7	0.0417183	0
16874	SAMD8	1-397-0-0-0	7	0.0417183	0
18484	BANF1	1-397-0-0-0	7	0.0417183	0
18820	ANKRD42	1-397-0-0-0	7	0.0417183	0
31710	SLC25A1	1-397-0-0-0	7	0.0417183	0
1000	CCDC24	1-377-0-0-0	7	0.0207096	0
6059	CCDC13_flip	1-377-0-0-0	7	0.0207096	0
11110	PIM1	1-377-0-0-0	7	0.0207096	0
15909	ZNF79_flip	1-377-0-0-0	7	0.0207096	0
27328	AC064805.2	1-377-0-0-0	7	0.0207096	0
28692	KANK2	1-377-0-0-0	7	0.0207096	0
31750	DGCR6L	1-377-0-0-0	7	0.0207096	0
2228	TMEM79	1-32-3-0-0	7	0.0332896	0.0753731
3008	TAF1A	1-32-3-0-0	7	0.0332896	0.0753731
7430	IL1RAP	1-32-3-0-0	7	0.0332896	0.0753731
10508	TBC1D7	1-32-3-0-0	7	0.0332896	0.0753731
15400	RORB	1-32-3-0-0	7	0.0332896	0.0753731
18180	MS4A6A	1-32-3-0-0	7	0.0332896	0.0753731
28762	AC008758.2	1-32-3-0-0	7	0.0332896	0.0753731
1870	RBM8A	1-307-0-0-0	7	0.0508142	0.0786843
3336	ZNF672	1-307-0-0-0	7	0.0508142	0.0786843
16484	AL512603.2	1-307-0-0-0	7	0.0508142	0.0786843
24086	CHD2	1-307-0-0-0	7	0.0508142	0.0786843
26520	CCL3	1-307-0-0-0	7	0.0508142	0.0786843
28502	CD70	1-307-0-0-0	7	0.0508142	0.0786843
29974	AKT1S1	1-307-0-0-0	7	0.0508142	0.0786843
548	SH3BGRL3	1-261-1-0-0	7	0.0741651	0
3066	H3F3A	1-261-1-0-0	7	0.0741651	0
14098	RAB11FIP1	1-261-1-0-0	7	0.0741651	0
15456	HNRNPK	1-261-1-0-0	7	0.0741651	0
15766	ATP6V1G1	1-261-1-0-0	7	0.0741651	0
22130	DNAAF2	1-261-1-0-0	7	0.0741651	0
30664	NXT1	1-261-1-0-0	7	0.0741651	0
3296	TFB2M	1-217-0-0-0	7	0.0636228	0.105908
6446	C3orf67	1-217-0-0-0	7	0.0636228	0.105908
9264	SV2C	1-217-0-0-0	7	0.0636228	0.105908
14536	INTS8	1-217-0-0-0	7	0.0636228	0.105908
16378	PRPF18	1-217-0-0-0	7	0.0636228	0.105908
16648	WDFY4	1-217-0-0-0	7	0.0636228	0.105908
16698	CCDC6	1-217-0-0-0	7	0.0636228	0.105908
3314	AL390728.6	1-209-0-0-0	7	0.05595	0
22848	EVL	1-209-0-0-0	7	0.05595	0
26588	CACNB1	1-209-0-0-0	7	0.05595	0
26720	RETREG3	1-209-0-0-0	7	0.05595	0
28782	TNPO2	1-209-0-0-0	7	0.05595	0
28832	MRI1	1-209-0-0-0	7	0.05595	0
28888	ZNF333	1-209-0-0-0	7	0.05595	0
3608	AC074117.1	1-204-0-0-0	7	0.0208866	0.0745517
5630	STK25	1-204-0-0-0	7	0.0208866	0.0745517
14224	AC103831.1	1-204-0-0-0	7	0.0208866	0.0745517
16330	ITIH2	1-204-0-0-0	7	0.0208866	0.0745517
17158	TWNK	1-204-0-0-0	7	0.0208866	0.0745517
24832	CDIPT	1-204-0-0-0	7	0.0208866	0.0745517
25224	FHOD1	1-204-0-0-0	7	0.0208866	0.0745517
5846	PLCL2	1-2-2-0-0	7	0.0769335	0
7230	GOLIM4	1-2-2-0-0	7	0.0769335	0
8356	MCUB	1-2-2-0-0	7	0.0769335	0
9290	TBCA	1-2-2-0-0	7	0.0769335	0
16954	PTEN	1-2-2-0-0	7	0.0769335	0
27138	USP32	1-2-2-0-0	7	0.0769335	0
31668	HDHD5	1-2-2-0-0	7	0.0769335	0
9320	ZFYVE16	1-2-11-0-0	7	0.0560341	0
15130	MLLT3	1-2-11-0-0	7	0.0560341	0
30516	ATRN	1-2-11-0-0	7	0.0560341	0
30734	NOL4L	1-2-11-0-0	7	0.0560341	0
31620	ADARB1	1-2-11-0-0	7	0.0560341	0
31652	PCNT	1-2-11-0-0	7	0.0560341	0
32208	TNRC6B	1-2-11-0-0	7	0.0560341	0
1918	LINC01138	1-2-1-0-0	7	0.0559681	0.11219
2506	AL645568.1	1-2-1-0-0	7	0.0559681	0.11219
6114	SACM1L	1-2-1-0-0	7	0.0559681	0.11219
15586	ZNF782	1-2-1-0-0	7	0.0559681	0.11219
19924	SCAF11	1-2-1-0-0	7	0.0559681	0.11219
20444	CPSF6	1-2-1-0-0	7	0.0559681	0.11219
27090	RNF43	1-2-1-0-0	7	0.0559681	0.11219
234	CENPS	1-190-2-0-0	7	0.0320502	0
7570	ATP5ME	1-190-2-0-0	7	0.0320502	0
13791	FAM85B_flip	1-190-2-0-0	7	0.0320502	0
17917	BDNF-AS_flip	1-190-2-0-0	7	0.0320502	0
23187	KNSTRN_flip	1-190-2-0-0	7	0.0320502	0
25143	AC026771.1_flip	1-190-2-0-0	7	0.0320502	0
33251	GRIA3_flip	1-190-2-0-0	7	0.0320502	0
4754	ACVR2A	1-154-0-0-0	7	0.0383145	0.090248
6104	EXOSC7	1-154-0-0-0	7	0.0383145	0.090248
14774	TRIB1	1-154-0-0-0	7	0.0383145	0.090248
18324	OTUB1	1-154-0-0-0	7	0.0383145	0.090248
21022	OASL	1-154-0-0-0	7	0.0383145	0.090248
27950	SLC14A2	1-154-0-0-0	7	0.0383145	0.090248
30166	LILRB3	1-154-0-0-0	7	0.0383145	0.090248
1140	PRPF38A	1-15-0-0-0	7	0.0573179	0.0712865
9342	SSBP2	1-15-0-0-0	7	0.0573179	0.0712865
11178	GUCA1B	1-15-0-0-0	7	0.0573179	0.0712865
11366	LMBRD1	1-15-0-0-0	7	0.0573179	0.0712865
24548	RRN3	1-15-0-0-0	7	0.0573179	0.0712865
29282	LINC01801	1-15-0-0-0	7	0.0573179	0.0712865
33048	POF1B	1-15-0-0-0	7	0.0573179	0.0712865
2804	PPP1R15B	1-126-1-0-0	7	0.0975896	0.173551
5886	NR1D2	1-126-1-0-0	7	0.0975896	0.173551
9876	TAF7	1-126-1-0-0	7	0.0975896	0.173551
10942	HLA-DQB1	1-126-1-0-0	7	0.0975896	0.173551
16754	DDX21	1-126-1-0-0	7	0.0975896	0.173551
19566	CD69	1-126-1-0-0	7	0.0975896	0.173551
21884	RBM23	1-126-1-0-0	7	0.0975896	0.173551
5738	EMC3	1-118-1-0-0	7	0.0850128	0
7108	EIF2A	1-118-1-0-0	7	0.0850128	0
10766	TRIM39	1-118-1-0-0	7	0.0850128	0
18292	STX5	1-118-1-0-0	7	0.0850128	0
21672	AL442067.3	1-118-1-0-0	7	0.0850128	0
31962	SF3A1	1-118-1-0-0	7	0.0850128	0
33332	INTS6L	1-118-1-0-0	7	0.0850128	0
4030	LINC01829	1-107-0-0-0	7	0.0286227	0.0615564
4664	CCDC115	1-107-0-0-0	7	0.0286227	0.0615564
7934	CORIN	1-107-0-0-0	7	0.0286227	0.0615564
10788	PPP1R18	1-107-0-0-0	7	0.0286227	0.0615564
16040	USP20	1-107-0-0-0	7	0.0286227	0.0615564
20298	AC022506.2	1-107-0-0-0	7	0.0286227	0.0615564
22084	MIPOL1	1-107-0-0-0	7	0.0286227	0.0615564
9852	EIF4EBP3	1-100-4-0-0	7	0.0486111	0
11696	DSE	1-100-4-0-0	7	0.0486111	0
15838	ZBTB26	1-100-4-0-0	7	0.0486111	0
17799	MRVI1_flip	1-100-4-0-0	7	0.0486111	0
18317	SPINDOC_flip	1-100-4-0-0	7	0.0486111	0
27582	ARL16	1-100-4-0-0	7	0.0486111	0
30492	EBF4	1-100-4-0-0	7	0.0486111	0
7438	CCDC50	1-10-1-0-0	7	0.0712558	0.104697
22120	MIS18BP1	1-10-1-0-0	7	0.0712558	0.104697
22472	TTC9	1-10-1-0-0	7	0.0712558	0.104697
23498	RFX7	1-10-1-0-0	7	0.0712558	0.104697
25008	ITFG1	1-10-1-0-0	7	0.0712558	0.104697
25014	PHKB	1-10-1-0-0	7	0.0712558	0.104697
29028	MAST3	1-10-1-0-0	7	0.0712558	0.104697
17346	ENO4	1-99-5-0-0	6	0.0670466	0
19830	AC024940.1	1-99-5-0-0	6	0.0670466	0
25642	APRT	1-99-5-0-0	6	0.0670466	0
27743	RAB12_flip	1-99-5-0-0	6	0.0670466	0
31575	RRP1_flip	1-99-5-0-0	6	0.0670466	0
33001	NEXMIF_flip	1-99-5-0-0	6	0.0670466	0
1760	SIKE1	1-97-1-0-0	6	0.0518343	0.083979
2280	MNDA	1-97-1-0-0	6	0.0518343	0.083979
6510	FOXP1	1-97-1-0-0	6	0.0518343	0.083979
15584	ZNF510	1-97-1-0-0	6	0.0518343	0.083979
16500	ABI1	1-97-1-0-0	6	0.0518343	0.083979
20924	RBM19	1-97-1-0-0	6	0.0518343	0.083979
2291	DUSP23_flip	1-97-0-1-0	6	0.0207581	0.100069
24161	NME4_flip	1-97-0-1-0	6	0.0207581	0.100069
26789	C17orf53_flip	1-97-0-1-0	6	0.0207581	0.100069
29665	ZNF428_flip	1-97-0-1-0	6	0.0207581	0.100069
30337	ZNF134_flip	1-97-0-1-0	6	0.0207581	0.100069
32223	ST13_flip	1-97-0-1-0	6	0.0207581	0.100069
10973	HCG24_flip	1-95-1-0-0	6	0.0567189	0.12856
12201	INTS1_flip	1-95-1-0-0	6	0.0567189	0.12856
16437	AL133415.1_flip	1-95-1-0-0	6	0.0567189	0.12856
17389	INPP5F_flip	1-95-1-0-0	6	0.0567189	0.12856
19547	A2M_flip	1-95-1-0-0	6	0.0567189	0.12856
25423	AC009120.5_flip	1-95-1-0-0	6	0.0567189	0.12856
77	MIB2_flip	1-95-0-1-0	6	0.0508403	0.11018
11393	AC019205.1_flip	1-95-0-1-0	6	0.0508403	0.11018
14347	SLCO5A1_flip	1-95-0-1-0	6	0.0508403	0.11018
14991	ZNF517_flip	1-95-0-1-0	6	0.0508403	0.11018
22067	SRP54_flip	1-95-0-1-0	6	0.0508403	0.11018
23917	STARD5_flip	1-95-0-1-0	6	0.0508403	0.11018
10972	HCG24	1-94-1-0-0	6	0.0567189	0.12856
12200	INTS1	1-94-1-0-0	6	0.0567189	0.12856
16436	AL133415.1	1-94-1-0-0	6	0.0567189	0.12856
17388	INPP5F	1-94-1-0-0	6	0.0567189	0.12856
19546	A2M	1-94-1-0-0	6	0.0567189	0.12856
25422	AC009120.5	1-94-1-0-0	6	0.0567189	0.12856
1630	AHCYL1	1-8-14-0-0	6	0.0590426	0
5956	PDCD6IP	1-8-14-0-0	6	0.0590426	0
7300	GNB4	1-8-14-0-0	6	0.0590426	0
10322	MGAT1	1-8-14-0-0	6	0.0590426	0
14396	PEX2	1-8-14-0-0	6	0.0590426	0
23030	CYFIP1	1-8-14-0-0	6	0.0590426	0
14437	AC079209.2_flip	1-8-12-0-0	6	0.0599493	0
15494	AL158071.3	1-8-12-0-0	6	0.0599493	0
19744	AC092794.1	1-8-12-0-0	6	0.0599493	0
23505	MNS1_flip	1-8-12-0-0	6	0.0599493	0
31764	SNAP29	1-8-12-0-0	6	0.0599493	0
31954	HORMAD2-AS1	1-8-12-0-0	6	0.0599493	0
2318	CD84	1-74-4-0-0	6	0.0248324	0
2942	FLVCR1-DT	1-74-4-0-0	6	0.0248324	0
4651	AC012306.2_flip	1-74-4-0-0	6	0.0248324	0
25161	SLC38A7_flip	1-74-4-0-0	6	0.0248324	0
26008	RNF227	1-74-4-0-0	6	0.0248324	0
31382	AF129075.3	1-74-4-0-0	6	0.0248324	0
792	AGO3	1-7-4-0-0	6	0.0841939	0
2768	SYT2	1-7-4-0-0	6	0.0841939	0
3636	BABAM2	1-7-4-0-0	6	0.0841939	0
4020	RAB1A	1-7-4-0-0	6	0.0841939	0
11492	AKIRIN2	1-7-4-0-0	6	0.0841939	0
33432	MECP2	1-7-4-0-0	6	0.0841939	0
14702	TAF2	1-7-3-0-0	6	0.0785263	0.134327
21416	ELF1	1-7-3-0-0	6	0.0785263	0.134327
22014	PRKD1	1-7-3-0-0	6	0.0785263	0.134327
23466	ARPP19	1-7-3-0-0	6	0.0785263	0.134327
27384	LLGL2	1-7-3-0-0	6	0.0785263	0.134327
27744	MTCL1	1-7-3-0-0	6	0.0785263	0.134327
4492	RANBP2	1-7-1-0-0	6	0.0740496	0.106478
12742	SBDS	1-7-1-0-0	6	0.0740496	0.106478
14180	AC090739.1	1-7-1-0-0	6	0.0740496	0.106478
15612	AL499604.1	1-7-1-0-0	6	0.0740496	0.106478
25610	SLC7A5	1-7-1-0-0	6	0.0740496	0.106478
27430	UBALD2	1-7-1-0-0	6	0.0740496	0.106478
4090	AC005234.2	1-604-0-0-0	6	0.0131627	0
10534	AL021978.1	1-604-0-0-0	6	0.0131627	0
12630	AC004854.2	1-604-0-0-0	6	0.0131627	0
12778	ELN	1-604-0-0-0	6	0.0131627	0
13332	AC073934.1	1-604-0-0-0	6	0.0131627	0
29790	PTGIR	1-604-0-0-0	6	0.0131627	0
10702	HIST1H2AI	1-572-0-0-0	6	0.00538609	0
10714	HIST1H3I	1-572-0-0-0	6	0.00538609	0
14888	RHPN1	1-572-0-0-0	6	0.00538609	0
16350	PROSER2	1-572-0-0-0	6	0.00538609	0
24208	AL008727.1	1-572-0-0-0	6	0.00538609	0
30760	ACTL10	1-572-0-0-0	6	0.00538609	0
16172	SNHG7	1-57-5-0-0	6	0.121728	0
20508	NAP1L1	1-57-5-0-0	6	0.121728	0
29608	RPS19	1-57-5-0-0	6	0.121728	0
29928	CD37	1-57-5-0-0	6	0.121728	0
30164	RPS9	1-57-5-0-0	6	0.121728	0
30228	RPL28	1-57-5-0-0	6	0.121728	0
1810	WARS2-AS1	1-55-7-0-0	6	0.0547232	0
7808	DHX15	1-55-7-0-0	6	0.0547232	0
14050	AC026979.2	1-55-7-0-0	6	0.0547232	0
16066	PRRC2B	1-55-7-0-0	6	0.0547232	0
23882	MTHFS	1-55-7-0-0	6	0.0547232	0
26870	ARL17B	1-55-7-0-0	6	0.0547232	0
2238	MEF2D	1-55-1-1-0	6	0.0896581	0
2872	CD55	1-55-1-1-0	6	0.0896581	0
3944	REL	1-55-1-1-0	6	0.0896581	0
10522	CD83	1-55-1-1-0	6	0.0896581	0
13522	BRAF	1-55-1-1-0	6	0.0896581	0
26334	TLCD1	1-55-1-1-0	6	0.0896581	0
7840	LINC02506	1-51-0-0-0	6	0.0552638	0.0979321
8934	C1QTNF3	1-51-0-0-0	6	0.0552638	0.0979321
9708	HSPA4	1-51-0-0-0	6	0.0552638	0.0979321
9894	PCDHGA8	1-51-0-0-0	6	0.0552638	0.0979321
11638	WASF1	1-51-0-0-0	6	0.0552638	0.0979321
15672	SLC44A1	1-51-0-0-0	6	0.0552638	0.0979321
4244	USP39	1-48-4-0-0	6	0.0255227	0
5412	ATG9A	1-48-4-0-0	6	0.0255227	0
9426	RFESD	1-48-4-0-0	6	0.0255227	0
16174	LCN10	1-48-4-0-0	6	0.0255227	0
18756	GVQW3	1-48-4-0-0	6	0.0255227	0
30290	ZNF71	1-48-4-0-0	6	0.0255227	0
324	PLEKHM2	1-433-0-0-0	6	0.0698415	0.0873695
3278	COX20	1-433-0-0-0	6	0.0698415	0.0873695
12000	ZBTB2	1-433-0-0-0	6	0.0698415	0.0873695
16146	AL355574.1	1-433-0-0-0	6	0.0698415	0.0873695
20100	EIF4B	1-433-0-0-0	6	0.0698415	0.0873695
29590	CCDC97	1-433-0-0-0	6	0.0698415	0.0873695
7174	LEKR1	1-41-6-0-0	6	0.0641713	0
10008	CCDC69	1-41-6-0-0	6	0.0641713	0
12276	RAC1	1-41-6-0-0	6	0.0641713	0
18758	EMSY	1-41-6-0-0	6	0.0641713	0
22362	ZBTB25	1-41-6-0-0	6	0.0641713	0
28318	AC092068.2	1-41-6-0-0	6	0.0641713	0
2270	FCRL2	1-41-2-0-0	6	0.0773585	0.120434
3558	ASXL2	1-41-2-0-0	6	0.0773585	0.120434
5546	DGKD	1-41-2-0-0	6	0.0773585	0.120434
11690	NT5DC1	1-41-2-0-0	6	0.0773585	0.120434
15490	SYK	1-41-2-0-0	6	0.0773585	0.120434
23948	AC022558.2	1-41-2-0-0	6	0.0773585	0.120434
7528	DLG1	1-4-9-0-0	6	0.0800283	0.147857
9794	CTNNA1	1-4-9-0-0	6	0.0800283	0.147857
11476	ZNF292	1-4-9-0-0	6	0.0800283	0.147857
12426	OSBPL3	1-4-9-0-0	6	0.0800283	0.147857
16078	RAPGEF1	1-4-9-0-0	6	0.0800283	0.147857
22350	SGPP1	1-4-9-0-0	6	0.0800283	0.147857
1470	RPAP2	1-4-5-0-0	6	0.0783114	0
4812	ACVR1C	1-4-5-0-0	6	0.0783114	0
11752	NCOA7	1-4-5-0-0	6	0.0783114	0
14404	ZC2HC1A	1-4-5-0-0	6	0.0783114	0
15872	SCAI	1-4-5-0-0	6	0.0783114	0
19944	PCED1B	1-4-5-0-0	6	0.0783114	0
492	IFNLR1	1-4-13-0-0	6	0.073051	0
840	INPP5B	1-4-13-0-0	6	0.073051	0
11444	LINC02542	1-4-13-0-0	6	0.073051	0
30246	ZNF784	1-4-13-0-0	6	0.073051	0
31730	COMT	1-4-13-0-0	6	0.073051	0
32354	ATXN10	1-4-13-0-0	6	0.073051	0
11086	PXT1	1-4-1-3-0	6	0.0689899	0
16628	WASHC2C	1-4-1-3-0	6	0.0689899	0
17336	FAM160B1	1-4-1-3-0	6	0.0689899	0
20656	CDK17	1-4-1-3-0	6	0.0689899	0
23314	STRC	1-4-1-3-0	6	0.0689899	0
33040	HDX	1-4-1-3-0	6	0.0689899	0
124	WRAP73	1-374-0-0-0	6	0.0325794	0.0728435
11348	AL021368.5	1-374-0-0-0	6	0.0325794	0.0728435
12180	GET4	1-374-0-0-0	6	0.0325794	0.0728435
14980	C8orf82	1-374-0-0-0	6	0.0325794	0.0728435
32464	AL732314.6	1-374-0-0-0	6	0.0325794	0.0728435
32650	CXorf21	1-374-0-0-0	6	0.0325794	0.0728435
3566	HADHB	1-358-0-0-0	6	0.0564517	0.119523
5058	ZC3H15	1-358-0-0-0	6	0.0564517	0.119523
28380	MRPL54	1-358-0-0-0	6	0.0564517	0.119523
31536	ZBTB21	1-358-0-0-0	6	0.0564517	0.119523
33020	PGK1	1-358-0-0-0	6	0.0564517	0.119523
33112	BEX2	1-358-0-0-0	6	0.0564517	0.119523
10780	MRPS18B	1-323-0-0-0	6	0.050398	0
14190	HOOK3	1-323-0-0-0	6	0.050398	0
19472	SPSB2	1-323-0-0-0	6	0.050398	0
20720	C12orf73	1-323-0-0-0	6	0.050398	0
24268	NDUFB10	1-323-0-0-0	6	0.050398	0
24778	TUFM	1-323-0-0-0	6	0.050398	0
7400	AC068631.1	1-32-8-0-0	6	0.0568956	0
8684	CEP44	1-32-8-0-0	6	0.0568956	0
21718	TEX30	1-32-8-0-0	6	0.0568956	0
22961	BTBD6_flip	1-32-8-0-0	6	0.0568956	0
25351	EXOSC6_flip	1-32-8-0-0	6	0.0568956	0
30386	ZNF8	1-32-8-0-0	6	0.0568956	0
1118	AC104170.1	1-32-2-0-0	6	0.0569141	0
5182	NIF3L1	1-32-2-0-0	6	0.0569141	0
8012	SRP72	1-32-2-0-0	6	0.0569141	0
12878	TP53TG1	1-32-2-0-0	6	0.0569141	0
18600	CHKA	1-32-2-0-0	6	0.0569141	0
20388	GNS	1-32-2-0-0	6	0.0569141	0
1306	ZRANB2	1-32-10-0-0	6	0.0696994	0
7678	STX18-AS1	1-32-10-0-0	6	0.0696994	0
11046	UHRF1BP1	1-32-10-0-0	6	0.0696994	0
16548	KIF5B	1-32-10-0-0	6	0.0696994	0
21356	N4BP2L1	1-32-10-0-0	6	0.0696994	0
28142	MBP	1-32-10-0-0	6	0.0696994	0
9461	AC008883.1_flip	1-312-2-0-0	6	0.071755	0
18027	AC010768.2_flip	1-312-2-0-0	6	0.071755	0
22460	AL356804.1	1-312-2-0-0	6	0.071755	0
28358	NFIC	1-312-2-0-0	6	0.071755	0
30856	TGIF2	1-312-2-0-0	6	0.071755	0
31509	PSMG1_flip	1-312-2-0-0	6	0.071755	0
17614	TOLLIP-AS1	1-31-5-0-0	6	0.0280207	0
23790	ULK3	1-31-5-0-0	6	0.0280207	0
25052	AC007728.1	1-31-5-0-0	6	0.0280207	0
29868	KCNJ14	1-31-5-0-0	6	0.0280207	0
30656	AL117332.1	1-31-5-0-0	6	0.0280207	0
30778	ASIP	1-31-5-0-0	6	0.0280207	0
6410	AC093928.1	1-31-2-0-0	6	0.0487778	0
6748	B4GALT4	1-31-2-0-0	6	0.0487778	0
9910	AC008781.1	1-31-2-0-0	6	0.0487778	0
29169	ZNF429_flip	1-31-2-0-0	6	0.0487778	0
30741	COMMD7_flip	1-31-2-0-0	6	0.0487778	0
32733	ZNF157_flip	1-31-2-0-0	6	0.0487778	0
1646	SLC16A4	1-31-1-0-0	6	0.0558669	0.122815
3806	AC010883.3	1-31-1-0-0	6	0.0558669	0.122815
12016	MTRF1L	1-31-1-0-0	6	0.0558669	0.122815
12416	FAM221A	1-31-1-0-0	6	0.0558669	0.122815
18134	ZDHHC5	1-31-1-0-0	6	0.0558669	0.122815
31084	DPM1	1-31-1-0-0	6	0.0558669	0.122815
22502	PAPLN	1-31-0-0-0	6	0.0371633	0.0791048
22574	AL049780.1	1-31-0-0-0	6	0.0371633	0.0791048
23386	AC023355.1	1-31-0-0-0	6	0.0371633	0.0791048
26710	AC067852.2	1-31-0-0-0	6	0.0371633	0.0791048
26780	LSM12	1-31-0-0-0	6	0.0371633	0.0791048
30158	TMC4	1-31-0-0-0	6	0.0371633	0.0791048
15798	B3GNT10	1-303-1-0-0	6	0.0222827	0.0825335
20690	SYCP3	1-303-1-0-0	6	0.0222827	0.0825335
24892	ZNF747	1-303-1-0-0	6	0.0222827	0.0825335
28292	PLEKHJ1	1-303-1-0-0	6	0.0222827	0.0825335
29324	RBM42	1-303-1-0-0	6	0.0222827	0.0825335
29866	GRWD1	1-303-1-0-0	6	0.0222827	0.0825335
4866	SLC38A11	1-292-0-0-0	6	0.017939	0
9908	AC008781.2	1-292-0-0-0	6	0.017939	0
13654	GIMAP1	1-292-0-0-0	6	0.017939	0
16782	PRF1	1-292-0-0-0	6	0.017939	0
17784	AC011092.3	1-292-0-0-0	6	0.017939	0
28942	AC008764.2	1-292-0-0-0	6	0.017939	0
8264	AP002026.1	1-287-0-0-0	6	0.0297066	0
9996	SYNPO	1-287-0-0-0	6	0.0297066	0
18032	PRDM11	1-287-0-0-0	6	0.0297066	0
26938	HOXB4	1-287-0-0-0	6	0.0297066	0
29250	RHPN2	1-287-0-0-0	6	0.0297066	0
32250	POLR3H	1-287-0-0-0	6	0.0297066	0
1570	AMY2B	1-274-0-0-0	6	0.0321624	0.0386444
6442	AC135507.1	1-274-0-0-0	6	0.0321624	0.0386444
9108	AC034234.1	1-274-0-0-0	6	0.0321624	0.0386444
20598	AC138123.2	1-274-0-0-0	6	0.0321624	0.0386444
25622	ZC3H18	1-274-0-0-0	6	0.0321624	0.0386444
27938	AC016493.1	1-274-0-0-0	6	0.0321624	0.0386444
544	CNKSR1	1-272-0-0-0	6	0.0508091	0.194911
3382	RSAD2	1-272-0-0-0	6	0.0508091	0.194911
8646	DDX60	1-272-0-0-0	6	0.0508091	0.194911
18018	ALKBH3	1-272-0-0-0	6	0.0508091	0.194911
24878	SEPTIN1	1-272-0-0-0	6	0.0508091	0.194911
27538	RNF213	1-272-0-0-0	6	0.0508091	0.194911
1280	MIER1	1-270-2-0-0	6	0.0726172	0
5596	NDUFA10	1-270-2-0-0	6	0.0726172	0
15158	MOB3B	1-270-2-0-0	6	0.0726172	0
16144	CAMSAP1	1-270-2-0-0	6	0.0726172	0
22772	ITPK1	1-270-2-0-0	6	0.0726172	0
33470	GAB3	1-270-2-0-0	6	0.0726172	0
10127	WWC1_flip	1-230-2-0-0	6	0.0308464	0.0775473
11271	NFKBIE_flip	1-230-2-0-0	6	0.0308464	0.0775473
14155	AC009630.1_flip	1-230-2-0-0	6	0.0308464	0.0775473
22947	AKT1_flip	1-230-2-0-0	6	0.0308464	0.0775473
24917	TMEM265_flip	1-230-2-0-0	6	0.0308464	0.0775473
25857	RNF167_flip	1-230-2-0-0	6	0.0308464	0.0775473
10126	WWC1	1-229-1-0-0	6	0.0308464	0.0775473
11270	NFKBIE	1-229-1-0-0	6	0.0308464	0.0775473
14154	AC009630.1	1-229-1-0-0	6	0.0308464	0.0775473
22946	AKT1	1-229-1-0-0	6	0.0308464	0.0775473
24916	TMEM265	1-229-1-0-0	6	0.0308464	0.0775473
25856	RNF167	1-229-1-0-0	6	0.0308464	0.0775473
68	ATAD3A	1-213-2-0-0	6	0.0320722	0.0671264
602	AL020997.5	1-213-2-0-0	6	0.0320722	0.0671264
14202	PRKDC	1-213-2-0-0	6	0.0320722	0.0671264
14368	AC022893.1	1-213-2-0-0	6	0.0320722	0.0671264
27592	MCRIP1	1-213-2-0-0	6	0.0320722	0.0671264
30440	TRIB3	1-213-2-0-0	6	0.0320722	0.0671264
260	MTOR-AS1	1-213-1-0-0	6	0.0430665	0
8550	DCLK2	1-213-1-0-0	6	0.0430665	0
23252	MAPKBP1	1-213-1-0-0	6	0.0430665	0
23592	DAPK2	1-213-1-0-0	6	0.0430665	0
25096	MT1F	1-213-1-0-0	6	0.0430665	0
28980	BABAM1	1-213-1-0-0	6	0.0430665	0
5262	ZDBF2	1-21-6-0-0	6	0.0752595	0
5582	PER2	1-21-6-0-0	6	0.0752595	0
7216	KPNA4	1-21-6-0-0	6	0.0752595	0
13904	GFRA2	1-21-6-0-0	6	0.0752595	0
24316	ATP6V0C	1-21-6-0-0	6	0.0752595	0
30928	SRSF6	1-21-6-0-0	6	0.0752595	0
9210	NAIP	1-21-0-0-0	6	0.0973876	0.119463
16924	GHITM	1-21-0-0-0	6	0.0973876	0.119463
17858	TPH1	1-21-0-0-0	6	0.0973876	0.119463
29656	PINLYP	1-21-0-0-0	6	0.0973876	0.119463
29740	ERCC1	1-21-0-0-0	6	0.0973876	0.119463
32156	GTPBP1	1-21-0-0-0	6	0.0973876	0.119463
5056	AC017071.1	1-2-21-0-0	6	0.0394431	0
7160	AC104472.5	1-2-21-0-0	6	0.0394431	0
10552	AL138724.1	1-2-21-0-0	6	0.0394431	0
14242	TGS1	1-2-21-0-0	6	0.0394431	0
23440	LYSMD2	1-2-21-0-0	6	0.0394431	0
26302	UNC119	1-2-21-0-0	6	0.0394431	0
15846	STRBP	1-2-1-1-0	6	0.0780916	0.149584
15850	DENND1A	1-2-1-1-0	6	0.0780916	0.149584
17470	MGMT	1-2-1-1-0	6	0.0780916	0.149584
19850	BICD1	1-2-1-1-0	6	0.0780916	0.149584
22506	NUMB	1-2-1-1-0	6	0.0780916	0.149584
26960	ZNF652	1-2-1-1-0	6	0.0780916	0.149584
5204	STRADB	1-193-5-0-0	6	0.0382295	0
12852	APTR	1-193-5-0-0	6	0.0382295	0
13834	AF131215.2	1-193-5-0-0	6	0.0382295	0
24386	DNASE1	1-193-5-0-0	6	0.0382295	0
25912	C17orf100	1-193-5-0-0	6	0.0382295	0
29542	ZNF780A	1-193-5-0-0	6	0.0382295	0
272	MAD2L2	1-190-1-0-0	6	0.0509272	0.0903844
10664	HIST1H4H	1-190-1-0-0	6	0.0509272	0.0903844
10956	PSMB9	1-190-1-0-0	6	0.0509272	0.0903844
29616	RABAC1	1-190-1-0-0	6	0.0509272	0.0903844
31854	MIF	1-190-1-0-0	6	0.0509272	0.0903844
31876	SNRPD3	1-190-1-0-0	6	0.0509272	0.0903844
2853	AC244034.2_flip	1-19-7-0-0	6	0.0298918	0
2950	PROX1	1-19-7-0-0	6	0.0298918	0
3741	AC007390.2_flip	1-19-7-0-0	6	0.0298918	0
5730	CRELD1	1-19-7-0-0	6	0.0298918	0
19616	SMIM10L1	1-19-7-0-0	6	0.0298918	0
20994	TRIAP1	1-19-7-0-0	6	0.0298918	0
4447	IL18RAP_flip	1-19-5-0-0	6	0.026041	0.0272286
10667	BTN3A2_flip	1-19-5-0-0	6	0.026041	0.0272286
11509	GABRR1_flip	1-19-5-0-0	6	0.026041	0.0272286
13841	SLC35G5_flip	1-19-5-0-0	6	0.026041	0.0272286
14141	HTRA4_flip	1-19-5-0-0	6	0.026041	0.0272286
25917	FBXO39_flip	1-19-5-0-0	6	0.026041	0.0272286
3758	RMDN2-AS1	1-182-1-0-0	6	0.029887	0.0821487
21760	TEX29	1-182-1-0-0	6	0.029887	0.0821487
24258	SPSB3	1-182-1-0-0	6	0.029887	0.0821487
24666	EEF2K	1-182-1-0-0	6	0.029887	0.0821487
26152	FLCN	1-182-1-0-0	6	0.029887	0.0821487
29288	AC008555.4	1-182-1-0-0	6	0.029887	0.0821487
7704	KIAA0232	1-159-1-0-0	6	0.0828912	0.107418
9098	PLK2	1-159-1-0-0	6	0.0828912	0.107418
16830	AL512656.1	1-159-1-0-0	6	0.0828912	0.107418
22232	SAMD4A	1-159-1-0-0	6	0.0828912	0.107418
24544	PDXDC1	1-159-1-0-0	6	0.0828912	0.107418
29010	MAP1S	1-159-1-0-0	6	0.0828912	0.107418
1652	KCNA2	1-154-5-0-0	6	0.0553735	0
4128	ALMS1	1-154-5-0-0	6	0.0553735	0
5082	ORMDL1	1-154-5-0-0	6	0.0553735	0
14808	AC131568.1	1-154-5-0-0	6	0.0553735	0
26620	MED24	1-154-5-0-0	6	0.0553735	0
33290	RAB33A	1-154-5-0-0	6	0.0553735	0
6146	PTPN23	1-15-5-0-0	6	0.0508319	0
14424	AC009812.1	1-15-5-0-0	6	0.0508319	0
15546	AL158152.1	1-15-5-0-0	6	0.0508319	0
23062	AC127502.2	1-15-5-0-0	6	0.0508319	0
26740	CNTD1	1-15-5-0-0	6	0.0508319	0
28798	DNASE2	1-15-5-0-0	6	0.0508319	0
6226	RHOA	1-144-3-0-0	6	0.0710933	0.126424
6924	H1FX	1-144-3-0-0	6	0.0710933	0.126424
16038	C9orf78	1-144-3-0-0	6	0.0710933	0.126424
16282	KLF6	1-144-3-0-0	6	0.0710933	0.126424
17596	PNPLA2	1-144-3-0-0	6	0.0710933	0.126424
29498	NFKBIB	1-144-3-0-0	6	0.0710933	0.126424
5420	TUBA4B	1-141-0-0-0	6	0.0429395	0.0884045
8248	STPG2	1-141-0-0-0	6	0.0429395	0.0884045
10860	GPANK1	1-141-0-0-0	6	0.0429395	0.0884045
17704	APBB1	1-141-0-0-0	6	0.0429395	0.0884045
24592	ARL6IP1	1-141-0-0-0	6	0.0429395	0.0884045
31698	TMEM191B	1-141-0-0-0	6	0.0429395	0.0884045
10772	GNL1	1-126-2-0-0	6	0.13115	0
13956	TNFRSF10B	1-126-2-0-0	6	0.13115	0
16730	SIRT1	1-126-2-0-0	6	0.13115	0
20074	DAZAP2	1-126-2-0-0	6	0.13115	0
22590	AL691403.1	1-126-2-0-0	6	0.13115	0
27096	TEX14	1-126-2-0-0	6	0.13115	0
1898	PRKAB2	1-125-2-0-0	6	0.0263109	0
6558	DHFR2	1-125-2-0-0	6	0.0263109	0
13962	AC100861.1	1-125-2-0-0	6	0.0263109	0
14176	VDAC3	1-125-2-0-0	6	0.0263109	0
15238	FANCG	1-125-2-0-0	6	0.0263109	0
28548	EVI5L	1-125-2-0-0	6	0.0263109	0
4795	FMNL2_flip	1-125-1-0-0	6	0.0260067	0.051593
11085	ETV7_flip	1-125-1-0-0	6	0.0260067	0.051593
11849	AL360178.1_flip	1-125-1-0-0	6	0.0260067	0.051593
11897	TXLNB_flip	1-125-1-0-0	6	0.0260067	0.051593
19867	AC084824.4_flip	1-125-1-0-0	6	0.0260067	0.051593
27197	FTSJ3_flip	1-125-1-0-0	6	0.0260067	0.051593
509	RUNX3_flip	1-120-1-0-0	6	0.0776577	0
11741	SERINC1_flip	1-120-1-0-0	6	0.0776577	0
15637	STX17-AS1_flip	1-120-1-0-0	6	0.0776577	0
15963	C9orf16_flip	1-120-1-0-0	6	0.0776577	0
30143	MYADM_flip	1-120-1-0-0	6	0.0776577	0
30795	TP53INP2_flip	1-120-1-0-0	6	0.0776577	0
1222	JUN	1-119-3-0-0	6	0.175119	0
5678	BHLHE40	1-119-3-0-0	6	0.175119	0
12080	C6orf99	1-119-3-0-0	6	0.175119	0
21222	ZNF10	1-119-3-0-0	6	0.175119	0
27778	CHMP1B	1-119-3-0-0	6	0.175119	0
32154	JOSD1	1-119-3-0-0	6	0.175119	0
8468	AC097376.3	1-111-2-0-0	6	0.0568799	0
15444	AL354920.1	1-111-2-0-0	6	0.0568799	0
19354	RAD52	1-111-2-0-0	6	0.0568799	0
26076	DNAH9	1-111-2-0-0	6	0.0568799	0
26950	UBE2Z	1-111-2-0-0	6	0.0568799	0
27228	LRRC37A3	1-111-2-0-0	6	0.0568799	0
390	SLC66A1	1-111-1-0-0	6	0.0427997	0.0552051
4722	LRP1B	1-111-1-0-0	6	0.0427997	0.0552051
12582	STK17A	1-111-1-0-0	6	0.0427997	0.0552051
29144	AC008554.1	1-111-1-0-0	6	0.0427997	0.0552051
30080	AC010320.3	1-111-1-0-0	6	0.0427997	0.0552051
30430	C20orf96	1-111-1-0-0	6	0.0427997	0.0552051
2716	AL157402.2	1-111-0-0-0	6	0.0460195	0.0914811
5682	AC026202.2	1-111-0-0-0	6	0.0460195	0.0914811
6722	QTRT2	1-111-0-0-0	6	0.0460195	0.0914811
18458	AP5B1	1-111-0-0-0	6	0.0460195	0.0914811
25012	AC007533.1	1-111-0-0-0	6	0.0460195	0.0914811
30340	ZNF211	1-111-0-0-0	6	0.0460195	0.0914811
2358	NDUFS2	1-110-2-0-0	6	0.0376839	0
3714	FAM98A	1-110-2-0-0	6	0.0376839	0
12384	CDCA7L	1-110-2-0-0	6	0.0376839	0
13830	AF131215.5	1-110-2-0-0	6	0.0376839	0
24030	ZNF710-AS1	1-110-2-0-0	6	0.0376839	0
27758	RALBP1	1-110-2-0-0	6	0.0376839	0
7245	SEC62-AS1_flip	1-107-1-0-0	6	0.0289553	0
13433	LRGUK_flip	1-107-1-0-0	6	0.0289553	0
17041	ACSM6_flip	1-107-1-0-0	6	0.0289553	0
27179	AC005828.1_flip	1-107-1-0-0	6	0.0289553	0
28969	AC020913.1_flip	1-107-1-0-0	6	0.0289553	0
30877	MANBAL_flip	1-107-1-0-0	6	0.0289553	0
5214	FZD7	1-103-1-0-0	6	0.0497635	0.0597234
12104	IGF2R	1-103-1-0-0	6	0.0497635	0.0597234
15164	ACO1	1-103-1-0-0	6	0.0497635	0.0597234
23202	RAD51	1-103-1-0-0	6	0.0497635	0.0597234
24158	TMEM8A	1-103-1-0-0	6	0.0497635	0.0597234
31804	IGLV1-51	1-103-1-0-0	6	0.0497635	0.0597234
5215	FZD7_flip	1-102-1-0-0	6	0.0497635	0.0597234
12105	IGF2R_flip	1-102-1-0-0	6	0.0497635	0.0597234
15165	ACO1_flip	1-102-1-0-0	6	0.0497635	0.0597234
23203	RAD51_flip	1-102-1-0-0	6	0.0497635	0.0597234
24159	TMEM8A_flip	1-102-1-0-0	6	0.0497635	0.0597234
31805	IGLV1-51_flip	1-102-1-0-0	6	0.0497635	0.0597234
12824	STYXL1	1-100-5-0-0	6	0.0396597	0.128167
14924	PARP10	1-100-5-0-0	6	0.0396597	0.128167
21308	MTIF3	1-100-5-0-0	6	0.0396597	0.128167
22886	ZNF839	1-100-5-0-0	6	0.0396597	0.128167
24164	RAB11FIP3	1-100-5-0-0	6	0.0396597	0.128167
31028	LINC00494	1-100-5-0-0	6	0.0396597	0.128167
5870	SGO1-AS1	1-0-8-0-0	6	0.408882	0
7976	SCFD2	1-0-8-0-0	6	0.408882	0
12040	ARID1B	1-0-8-0-0	6	0.408882	0
16738	RUFY2	1-0-8-0-0	6	0.408882	0
18882	PANX1	1-0-8-0-0	6	0.408882	0
24134	TM2D3	1-0-8-0-0	6	0.408882	0
94	FAAP20	1-99-3-0-0	5	0.0422673	0
10327	LINC00847_flip	1-99-3-0-0	5	0.0422673	0
14641	BAALC-AS1_flip	1-99-3-0-0	5	0.0422673	0
23078	LINC02352	1-99-3-0-0	5	0.0422673	0
29942	FCGRT	1-99-3-0-0	5	0.0422673	0
17610	MUC6	1-97-2-0-0	5	0.0976169	0
18096	CELF1	1-97-2-0-0	5	0.0976169	0
22384	MAX	1-97-2-0-0	5	0.0976169	0
27544	RPTOR	1-97-2-0-0	5	0.0976169	0
32216	MRTFA	1-97-2-0-0	5	0.0976169	0
1092	LINC01389	1-97-0-1-1	5	0.0572543	0.0844863
1718	SLC16A1	1-97-0-1-1	5	0.0572543	0.0844863
18398	ZNHIT2	1-97-0-1-1	5	0.0572543	0.0844863
21918	NGDN	1-97-0-1-1	5	0.0572543	0.0844863
29702	ZNF235	1-97-0-1-1	5	0.0572543	0.0844863
1178	YIPF1	1-93-6-0-0	5	0.0717853	0
1916	NBPF11	1-93-6-0-0	5	0.0717853	0
5314	LANCL1	1-93-6-0-0	5	0.0717853	0
10681	ABT1_flip	1-93-6-0-0	5	0.0717853	0
25891	C1QBP_flip	1-93-6-0-0	5	0.0717853	0
6286	NPRL2	1-91-2-0-0	5	0.0613665	0
24986	ZNF267	1-91-2-0-0	5	0.0613665	0
27594	P4HB	1-91-2-0-0	5	0.0613665	0
30266	ZSCAN5A	1-91-2-0-0	5	0.0613665	0
30952	PKIG	1-91-2-0-0	5	0.0613665	0
5254	INO80D	1-86-6-0-0	5	0.0849958	0
6872	ZXDC	1-86-6-0-0	5	0.0849958	0
11322	ELOVL5	1-86-6-0-0	5	0.0849958	0
28894	BRD4	1-86-6-0-0	5	0.0849958	0
32512	TBL1X	1-86-6-0-0	5	0.0849958	0
10800	IER3	1-84-6-0-0	5	0.0170082	0
14526	RAD54B	1-84-6-0-0	5	0.0170082	0
18466	EFEMP2	1-84-6-0-0	5	0.0170082	0
31772	THAP7-AS1	1-84-6-0-0	5	0.0170082	0
33342	HTATSF1	1-84-6-0-0	5	0.0170082	0
3200	TOMM20	1-84-4-0-0	5	0.0539697	0.0905217
17702	SMPD1	1-84-4-0-0	5	0.0539697	0.0905217
23040	SNURF	1-84-4-0-0	5	0.0539697	0.0905217
30084	AC010320.4	1-84-4-0-0	5	0.0539697	0.0905217
30992	AL162458.1	1-84-4-0-0	5	0.0539697	0.0905217
13618	ATP6V0E2-AS1	1-79-3-0-0	5	0.0429265	0.0741842
15042	CDC37L1-DT	1-79-3-0-0	5	0.0429265	0.0741842
23342	EIF3J	1-79-3-0-0	5	0.0429265	0.0741842
25062	AKTIP	1-79-3-0-0	5	0.0429265	0.0741842
27690	AP005136.4	1-79-3-0-0	5	0.0429265	0.0741842
40	UBE2J2	1-77-9-0-0	5	0.0499919	0
4201	AC007099.1_flip	1-77-9-0-0	5	0.0499919	0
5777	CAND2_flip	1-77-9-0-0	5	0.0499919	0
28009	SKA1_flip	1-77-9-0-0	5	0.0499919	0
31734	TANGO2	1-77-9-0-0	5	0.0499919	0
1607	AL356488.2_flip	1-77-8-0-0	5	0.0634189	0
2112	C1orf189	1-77-8-0-0	5	0.0634189	0
4268	RNF103	1-77-8-0-0	5	0.0634189	0
8226	NAP1L5	1-77-8-0-0	5	0.0634189	0
23003	IGHV3-23_flip	1-77-8-0-0	5	0.0634189	0
6864	AC092902.4	1-77-4-0-0	5	0.035605	0
8498	AC139720.1	1-77-4-0-0	5	0.035605	0
26954	AC091133.1	1-77-4-0-0	5	0.035605	0
27362	NUP85	1-77-4-0-0	5	0.035605	0
31194	OSBPL2	1-77-4-0-0	5	0.035605	0
12782	LIMK1	1-77-12-0-0	5	0.0285609	0
14912	AC105219.1	1-77-12-0-0	5	0.0285609	0
20836	IFT81	1-77-12-0-0	5	0.0285609	0
25462	KARS	1-77-12-0-0	5	0.0285609	0
29120	ZNF101	1-77-12-0-0	5	0.0285609	0
28240	DAZAP1	1-77-11-0-0	5	0.0919612	0
31146	RAB22A	1-77-11-0-0	5	0.0919612	0
31296	U2AF1L5	1-77-11-0-0	5	0.0919612	0
31632	PCBP3	1-77-11-0-0	5	0.0919612	0
33266	AL008633.1	1-77-11-0-0	5	0.0919612	0
2558	AL137796.1	1-77-1-0-0	5	0.0474366	0
24298	MLST8	1-77-1-0-0	5	0.0474366	0
29380	ZFP82	1-77-1-0-0	5	0.0474366	0
32785	TIMM17B_flip	1-77-1-0-0	5	0.0474366	0
33207	PGRMC1_flip	1-77-1-0-0	5	0.0474366	0
4822	PKP4	1-76-3-0-0	5	0.0328392	0.137827
6882	MCM2	1-76-3-0-0	5	0.0328392	0.137827
15266	GBA2	1-76-3-0-0	5	0.0328392	0.137827
15642	AL358937.1	1-76-3-0-0	5	0.0328392	0.137827
26224	GRAPL	1-76-3-0-0	5	0.0328392	0.137827
3016	BROX	1-76-2-0-0	5	0.0334612	0.0919154
5194	CFLAR-AS1	1-76-2-0-0	5	0.0334612	0.0919154
24722	LCMT1	1-76-2-0-0	5	0.0334612	0.0919154
27872	PSMA8	1-76-2-0-0	5	0.0334612	0.0919154
32410	AL022328.4	1-76-2-0-0	5	0.0334612	0.0919154
434	HSPG2	1-76-1-0-0	5	0.0455166	0.0875963
1324	ACADM	1-76-1-0-0	5	0.0455166	0.0875963
9242	GFM2	1-76-1-0-0	5	0.0455166	0.0875963
13900	INTS10	1-76-1-0-0	5	0.0455166	0.0875963
15202	DCAF12	1-76-1-0-0	5	0.0455166	0.0875963
8216	PPM1K-DT	1-72-0-0-0	5	0.0331224	0
10324	HEIH	1-72-0-0-0	5	0.0331224	0
10944	HLA-DQB1-AS1	1-72-0-0-0	5	0.0331224	0
17290	BBIP1	1-72-0-0-0	5	0.0331224	0
21994	ADCY4	1-72-0-0-0	5	0.0331224	0
2388	ATF6	1-7-5-0-0	5	0.0871181	0
12094	SOD2	1-7-5-0-0	5	0.0871181	0
19114	IL10RA	1-7-5-0-0	5	0.0871181	0
19636	BORCS5	1-7-5-0-0	5	0.0871181	0
23988	AC087286.2	1-7-5-0-0	5	0.0871181	0
2076	AL162258.2	1-7-17-0-0	5	0.0929107	0
20768	CRY1	1-7-17-0-0	5	0.0929107	0
23670	ZWILCH	1-7-17-0-0	5	0.0929107	0
25970	POLR2A	1-7-17-0-0	5	0.0929107	0
28784	TRIR	1-7-17-0-0	5	0.0929107	0
2330	CD244	1-7-10-0-0	5	0.0634764	0.110688
8428	SPATA5	1-7-10-0-0	5	0.0634764	0.110688
8502	USP38	1-7-10-0-0	5	0.0634764	0.110688
13844	BLK	1-7-10-0-0	5	0.0634764	0.110688
14802	FAM49B	1-7-10-0-0	5	0.0634764	0.110688
10350	AL365272.1	1-7-1-1-0	5	0.0706539	0
11296	CD2AP	1-7-1-1-0	5	0.0706539	0
14904	PYCR3	1-7-1-1-0	5	0.0706539	0
19926	SLC38A1	1-7-1-1-0	5	0.0706539	0
22366	ZBTB1	1-7-1-1-0	5	0.0706539	0
254	EXOSC10	1-68-4-0-0	5	0.0347837	0
1836	HIST2H3PS2	1-68-4-0-0	5	0.0347837	0
4870	SCN2A	1-68-4-0-0	5	0.0347837	0
6718	AC128687.3	1-68-4-0-0	5	0.0347837	0
32128	AL031587.2	1-68-4-0-0	5	0.0347837	0
5137	AC013264.1_flip	1-67-5-0-0	5	0.0327309	0
6932	IFT122	1-67-5-0-0	5	0.0327309	0
17309	AL139120.1_flip	1-67-5-0-0	5	0.0327309	0
28556	AC010336.8	1-67-5-0-0	5	0.0327309	0
31517	GET1_flip	1-67-5-0-0	5	0.0327309	0
2398	DDR2	1-64-5-0-0	5	0.0876185	0.11828
7868	KLHL5	1-64-5-0-0	5	0.0876185	0.11828
13826	XKR6	1-64-5-0-0	5	0.0876185	0.11828
21128	GTF2H3	1-64-5-0-0	5	0.0876185	0.11828
26554	SYNRG	1-64-5-0-0	5	0.0876185	0.11828
3974	EHBP1	1-64-0-1-0	5	0.0877915	0.173132
4040	PPP3R1	1-64-0-1-0	5	0.0877915	0.173132
8976	RICTOR	1-64-0-1-0	5	0.0877915	0.173132
9922	RNF14	1-64-0-1-0	5	0.0877915	0.173132
20714	C12orf42	1-64-0-1-0	5	0.0877915	0.173132
1814	PHGDH	1-63-4-0-0	5	0.0373927	0
14339	COPS5_flip	1-63-4-0-0	5	0.0373927	0
19069	HTR3A_flip	1-63-4-0-0	5	0.0373927	0
26869	KANSL1-AS1_flip	1-63-4-0-0	5	0.0373927	0
32037	SYN3_flip	1-63-4-0-0	5	0.0373927	0
2972	LYPLAL1	1-60-7-0-0	5	0.069316	0
5016	CCDC141	1-60-7-0-0	5	0.069316	0
6712	GRAMD1C	1-60-7-0-0	5	0.069316	0
8606	CTSO	1-60-7-0-0	5	0.069316	0
25342	WWP2	1-60-7-0-0	5	0.069316	0
1558	DPH5	1-60-1-0-0	5	0.0358384	0.0450076
3712	AC020594.1	1-60-1-0-0	5	0.0358384	0.0450076
7592	AC092535.4	1-60-1-0-0	5	0.0358384	0.0450076
11918	ADAT2	1-60-1-0-0	5	0.0358384	0.0450076
17490	JAKMIP3	1-60-1-0-0	5	0.0358384	0.0450076
388	AKR7A2	1-57-1-1-0	5	0.0220573	0
7458	TMEM44-AS1	1-57-1-1-0	5	0.0220573	0
22790	OTUB2	1-57-1-1-0	5	0.0220573	0
23960	HDGFL3	1-57-1-1-0	5	0.0220573	0
32526	MSL3	1-57-1-1-0	5	0.0220573	0
12238	AC024028.1	1-562-0-0-0	5	0.00603529	0
22330	AL359220.1	1-562-0-0-0	5	0.00603529	0
24212	AC120498.9	1-562-0-0-0	5	0.00603529	0
31864	SUSD2	1-562-0-0-0	5	0.00603529	0
32866	ALAS2	1-562-0-0-0	5	0.00603529	0
2430	GPA33	1-558-0-0-0	5	0.00551539	0
3360	TRAPPC12-AS1	1-558-0-0-0	5	0.00551539	0
13560	TMEM139	1-558-0-0-0	5	0.00551539	0
19864	AC084824.3	1-558-0-0-0	5	0.00551539	0
22740	AL135818.2	1-558-0-0-0	5	0.00551539	0
584	TMEM222	1-55-8-0-0	5	0.0248906	0
2488	PRRC2C	1-55-8-0-0	5	0.0248906	0
24600	AC099518.4	1-55-8-0-0	5	0.0248906	0
31548	AP001628.1	1-55-8-0-0	5	0.0248906	0
31560	LINC01679	1-55-8-0-0	5	0.0248906	0
1884	AC239799.2	1-55-3-0-0	5	0.0649816	0.0961625
12838	POMZP3	1-55-3-0-0	5	0.0649816	0.0961625
18686	RELT	1-55-3-0-0	5	0.0649816	0.0961625
23488	PIGB	1-55-3-0-0	5	0.0649816	0.0961625
27808	LDLRAD4	1-55-3-0-0	5	0.0649816	0.0961625
338	ZBTB17	1-55-0-2-0	5	0.0851604	0
1984	MCL1	1-55-0-2-0	5	0.0851604	0
23872	MORF4L1	1-55-0-2-0	5	0.0851604	0
28626	P2RY11	1-55-0-2-0	5	0.0851604	0
32300	Z93241.1	1-55-0-2-0	5	0.0851604	0
3892	PSME4	1-55-0-0-1	5	0.0703692	0.134314
10746	GABBR1	1-55-0-0-1	5	0.0703692	0.134314
16072	AL358781.2	1-55-0-0-1	5	0.0703692	0.134314
21554	INTS6	1-55-0-0-1	5	0.0703692	0.134314
24320	PDPK1	1-55-0-0-1	5	0.0703692	0.134314
1422	PKN2-AS1	1-46-8-0-0	5	0.0480177	0
25834	AC091153.2	1-46-8-0-0	5	0.0480177	0
25983	AC016876.1_flip	1-46-8-0-0	5	0.0480177	0
26834	NMT1	1-46-8-0-0	5	0.0480177	0
28480	AC011444.2	1-46-8-0-0	5	0.0480177	0
7477	PPP1R2_flip	1-46-0-0-0	5	0.0739816	0.108396
8331	AIMP1_flip	1-46-0-0-0	5	0.0739816	0.108396
22465	SYNJ2BP_flip	1-46-0-0-0	5	0.0739816	0.108396
29739	CD3EAP_flip	1-46-0-0-0	5	0.0739816	0.108396
33531	NLGN4Y_flip	1-46-0-0-0	5	0.0739816	0.108396
6198	AC137630.2	1-455-0-0-0	5	0.00548088	0
19020	AP001781.1	1-455-0-0-0	5	0.00548088	0
24618	AC002550.1	1-455-0-0-0	5	0.00548088	0
26514	HEATR9	1-455-0-0-0	5	0.00548088	0
26572	AC006449.3	1-455-0-0-0	5	0.00548088	0
7395	CRYGS_flip	1-45-9-0-0	5	0.0539528	0
18597	TCIRG1_flip	1-45-9-0-0	5	0.0539528	0
25954	KCTD11	1-45-9-0-0	5	0.0539528	0
31406	MIS18A	1-45-9-0-0	5	0.0539528	0
33076	GLA	1-45-9-0-0	5	0.0539528	0
10304	SQSTM1	1-45-4-0-0	5	0.162644	0
23038	SNRPN	1-45-4-0-0	5	0.162644	0
28790	JUNB	1-45-4-0-0	5	0.162644	0
28824	IER2	1-45-4-0-0	5	0.162644	0
29044	JUND	1-45-4-0-0	5	0.162644	0
5404	CNPPD1	1-45-3-0-0	5	0.120745	0
13254	IFRD1	1-45-3-0-0	5	0.120745	0
18512	MRPL11	1-45-3-0-0	5	0.120745	0
22904	EIF5	1-45-3-0-0	5	0.120745	0
25098	MT1X	1-45-3-0-0	5	0.120745	0
6612	RPL24	1-45-2-0-0	5	0.129357	0.164813
10938	HLA-DRB1	1-45-2-0-0	5	0.129357	0.164813
21302	RPL21	1-45-2-0-0	5	0.129357	0.164813
29900	PPP1R15A	1-45-2-0-0	5	0.129357	0.164813
30482	SNRPB	1-45-2-0-0	5	0.129357	0.164813
12115	PACRG_flip	1-42-1-0-0	5	0.0153669	0.0664101
12873	AC005076.1_flip	1-42-1-0-0	5	0.0153669	0.0664101
19749	LMNTD1_flip	1-42-1-0-0	5	0.0153669	0.0664101
23333	FRMD5_flip	1-42-1-0-0	5	0.0153669	0.0664101
28115	TIMM21_flip	1-42-1-0-0	5	0.0153669	0.0664101
2462	BLZF1	1-42-0-0-0	5	0.0471943	0.0577225
15994	PKN3	1-42-0-0-0	5	0.0471943	0.0577225
17808	ZBED5-AS1	1-42-0-0-0	5	0.0471943	0.0577225
20286	LRP1	1-42-0-0-0	5	0.0471943	0.0577225
22302	L3HYPDH	1-42-0-0-0	5	0.0471943	0.0577225
5920	OSBPL10	1-41-1-0-0	5	0.0532326	0.0870596
6946	PIK3R4	1-41-1-0-0	5	0.0532326	0.0870596
7210	IFT80	1-41-1-0-0	5	0.0532326	0.0870596
25318	SNTB2	1-41-1-0-0	5	0.0532326	0.0870596
30730	KIF3B	1-41-1-0-0	5	0.0532326	0.0870596
3328	OR2G6	1-41-0-2-0	5	0.13355	0
3906	RTN4	1-41-0-2-0	5	0.13355	0
6042	CTNNB1	1-41-0-2-0	5	0.13355	0
12420	MPP6	1-41-0-2-0	5	0.13355	0
22842	CCNK	1-41-0-2-0	5	0.13355	0
13148	FAM185A	1-41-0-1-0	5	0.0559362	0
16778	EIF4EBP2	1-41-0-1-0	5	0.0559362	0
17166	BTRC	1-41-0-1-0	5	0.0559362	0
22402	GPHN	1-41-0-1-0	5	0.0559362	0
23746	BBS4	1-41-0-1-0	5	0.0559362	0
4440	RNF149	1-4-7-0-0	5	0.0855172	0
9382	MEF2C	1-4-7-0-0	5	0.0855172	0
10538	ATXN1	1-4-7-0-0	5	0.0855172	0
22032	HECTD1	1-4-7-0-0	5	0.0855172	0
26100	TVP23C	1-4-7-0-0	5	0.0855172	0
6836	PDIA5	1-4-10-0-0	5	0.0519991	0.0738726
19560	CLEC2D	1-4-10-0-0	5	0.0519991	0.0738726
21622	KCTD12	1-4-10-0-0	5	0.0519991	0.0738726
22030	AP4S1	1-4-10-0-0	5	0.0519991	0.0738726
22882	WDR20	1-4-10-0-0	5	0.0519991	0.0738726
21238	ZMYM2	1-4-0-4-0	5	0.0713265	0
23824	UBE2Q2	1-4-0-4-0	5	0.0713265	0
24102	MEF2A	1-4-0-4-0	5	0.0713265	0
32712	SLC9A7	1-4-0-4-0	5	0.0713265	0
33050	CHM	1-4-0-4-0	5	0.0713265	0
2420	AL358115.1	1-383-0-0-0	5	0.0288542	0.127701
4094	NAGK	1-383-0-0-0	5	0.0288542	0.127701
16252	ARRDC1	1-383-0-0-0	5	0.0288542	0.127701
26678	NKIRAS2	1-383-0-0-0	5	0.0288542	0.127701
30292	ZNF835	1-383-0-0-0	5	0.0288542	0.127701
11948	RAB32	1-363-0-0-0	5	0.00655406	0
18526	ACTN3	1-363-0-0-0	5	0.00655406	0
19526	CLEC4E	1-363-0-0-0	5	0.00655406	0
20292	NDUFA4L2	1-363-0-0-0	5	0.00655406	0
30138	NLRP12	1-363-0-0-0	5	0.00655406	0
3101	GUK1_flip	1-360-0-0-0	5	0.0672245	0
7587	IDUA_flip	1-360-0-0-0	5	0.0672245	0
8115	CCNI_flip	1-360-0-0-0	5	0.0672245	0
29829	NAPA-AS1_flip	1-360-0-0-0	5	0.0672245	0
33273	SASH3_flip	1-360-0-0-0	5	0.0672245	0
312	CTRC	1-357-0-0-0	5	0.0457156	0
9824	CXXC5	1-357-0-0-0	5	0.0457156	0
17504	TUBGCP2	1-357-0-0-0	5	0.0457156	0
30156	LENG1	1-357-0-0-0	5	0.0457156	0
30858	RAB5IF	1-357-0-0-0	5	0.0457156	0
6633	LINC00882_flip	1-353-1-0-0	5	0.0478967	0
15522	IPPK	1-353-1-0-0	5	0.0478967	0
16519	LINC02652_flip	1-353-1-0-0	5	0.0478967	0
25206	TRADD	1-353-1-0-0	5	0.0478967	0
31986	TUG1	1-353-1-0-0	5	0.0478967	0
2642	EDEM3	1-34-7-0-0	5	0.058649	0.160726
4392	INPP4A	1-34-7-0-0	5	0.058649	0.160726
9252	CERT1	1-34-7-0-0	5	0.058649	0.160726
11600	SEC63	1-34-7-0-0	5	0.058649	0.160726
20424	LINC02384	1-34-7-0-0	5	0.058649	0.160726
1052	GPBP1L1	1-34-13-0-0	5	0.0739238	0
5202	TRAK2	1-34-13-0-0	5	0.0739238	0
15086	KDM4C	1-34-13-0-0	5	0.0739238	0
16930	WAPL	1-34-13-0-0	5	0.0739238	0
32666	CYBB	1-34-13-0-0	5	0.0739238	0
5648	CHL1	1-337-1-0-0	5	0.122432	0
9472	CHD1	1-337-1-0-0	5	0.122432	0
14158	GPAT4	1-337-1-0-0	5	0.122432	0
31052	SLC9A8	1-337-1-0-0	5	0.122432	0
31386	BACH1	1-337-1-0-0	5	0.122432	0
13416	LINC-PINT	1-335-0-0-0	5	0.0836091	0
13748	ESYT2	1-335-0-0-0	5	0.0836091	0
16642	MAPK8	1-335-0-0-0	5	0.0836091	0
22434	ZFP36L1	1-335-0-0-0	5	0.0836091	0
32842	SMC1A	1-335-0-0-0	5	0.0836091	0
2108	NUP210L	1-328-1-0-0	5	0.079915	0
3462	FAM49A	1-328-1-0-0	5	0.079915	0
3586	OST4	1-328-1-0-0	5	0.079915	0
19712	LDHB	1-328-1-0-0	5	0.079915	0
31070	PTPN1	1-328-1-0-0	5	0.079915	0
4806	GALNT5	1-32-14-0-0	5	0.0279191	0
6130	LRRC2	1-32-14-0-0	5	0.0279191	0
7116	AC011317.1	1-32-14-0-0	5	0.0279191	0
11244	POLH	1-32-14-0-0	5	0.0279191	0
30698	FAM242A	1-32-14-0-0	5	0.0279191	0
5654	TRNT1	1-317-0-0-0	5	0.0599285	0.0812398
9704	ZCCHC10	1-317-0-0-0	5	0.0599285	0.0812398
22068	FAM177A1	1-317-0-0-0	5	0.0599285	0.0812398
27722	TGIF1	1-317-0-0-0	5	0.0599285	0.0812398
29114	LPAR2	1-317-0-0-0	5	0.0599285	0.0812398
11820	TBPL1	1-312-1-0-0	5	0.0698031	0
13910	DMTN	1-312-1-0-0	5	0.0698031	0
15760	AKNA	1-312-1-0-0	5	0.0698031	0
19379	FKBP4_flip	1-312-1-0-0	5	0.0698031	0
31009	SLC13A3_flip	1-312-1-0-0	5	0.0698031	0
5180	PPIL3	1-31-14-0-0	5	0.0328236	0
5672	EGOT	1-31-14-0-0	5	0.0328236	0
7192	AC106707.1	1-31-14-0-0	5	0.0328236	0
16674	WASHC2A	1-31-14-0-0	5	0.0328236	0
27082	TSPOAP1	1-31-14-0-0	5	0.0328236	0
1290	LRRC7	1-31-12-0-0	5	0.0299311	0
3580	MAPRE3	1-31-12-0-0	5	0.0299311	0
5640	D2HGDH	1-31-12-0-0	5	0.0299311	0
12102	MRPL18	1-31-12-0-0	5	0.0299311	0
27422	ZACN	1-31-12-0-0	5	0.0299311	0
2564	ANGPTL1	1-31-10-0-0	5	0.0649707	0
2706	AL365258.1	1-31-10-0-0	5	0.0649707	0
2812	LRRN2	1-31-10-0-0	5	0.0649707	0
28854	SAMD1	1-31-10-0-0	5	0.0649707	0
29834	BICRA	1-31-10-0-0	5	0.0649707	0
2082	ILF2	1-307-1-0-0	5	0.0635434	0
4720	LINC02631	1-307-1-0-0	5	0.0635434	0
17280	DUSP5	1-307-1-0-0	5	0.0635434	0
21818	AL355075.4	1-307-1-0-0	5	0.0635434	0
27032	UTP18	1-307-1-0-0	5	0.0635434	0
2028	PI4KB	1-289-1-0-0	5	0.0915855	0.073327
17804	AC116535.1	1-289-1-0-0	5	0.0915855	0.073327
24630	ERI2	1-289-1-0-0	5	0.0915855	0.073327
25914	XAF1	1-289-1-0-0	5	0.0915855	0.073327
26318	KIAA0100	1-289-1-0-0	5	0.0915855	0.073327
12308	MIOS	1-288-1-0-0	5	0.0654954	0.0865637
19086	ZPR1	1-288-1-0-0	5	0.0654954	0.0865637
20852	PPTC7	1-288-1-0-0	5	0.0654954	0.0865637
26926	SNX11	1-288-1-0-0	5	0.0654954	0.0865637
30234	ZNF628	1-288-1-0-0	5	0.0654954	0.0865637
3792	C2orf91	1-286-2-0-0	5	0.00585913	0
12846	AC098851.1	1-286-2-0-0	5	0.00585913	0
32004	LINC01521	1-286-2-0-0	5	0.00585913	0
32356	LINC00899	1-286-2-0-0	5	0.00585913	0
32488	LINC00102	1-286-2-0-0	5	0.00585913	0
3052	SRP9	1-283-1-0-0	5	0.069031	0
10870	DDAH2	1-283-1-0-0	5	0.069031	0
22688	GALC	1-283-1-0-0	5	0.069031	0
27248	PSMD12	1-283-1-0-0	5	0.069031	0
32670	RPGR	1-283-1-0-0	5	0.069031	0
1856	CD160	1-274-2-0-0	5	0.0508057	0
13153	ARMC10_flip	1-274-2-0-0	5	0.0508057	0
16411	RPP38_flip	1-274-2-0-0	5	0.0508057	0
17241	PDCD11_flip	1-274-2-0-0	5	0.0508057	0
23938	AC105339.3	1-274-2-0-0	5	0.0508057	0
10862	CSNK2B	1-271-1-0-0	5	0.0490107	0.0989753
14324	RRS1	1-271-1-0-0	5	0.0490107	0.0989753
15384	KLF9	1-271-1-0-0	5	0.0490107	0.0989753
22556	NPC2	1-271-1-0-0	5	0.0490107	0.0989753
32746	UXT	1-271-1-0-0	5	0.0490107	0.0989753
1302	CTH	1-270-0-0-0	5	0.0253924	0.0821706
8690	GLRA3	1-270-0-0-0	5	0.0253924	0.0821706
8936	RAI14	1-270-0-0-0	5	0.0253924	0.0821706
9140	ADAMTS6	1-270-0-0-0	5	0.0253924	0.0821706
24976	ARMC5	1-270-0-0-0	5	0.0253924	0.0821706
6	LINC01128	1-266-1-0-0	5	0.0391477	0
16566	CUL2	1-266-1-0-0	5	0.0391477	0
17440	AL731577.2	1-266-1-0-0	5	0.0391477	0
24914	SRCAP	1-266-1-0-0	5	0.0391477	0
28550	MAP2K7	1-266-1-0-0	5	0.0391477	0
4826	WDSUB1	1-263-0-0-0	5	0.0327757	0.0647309
5222	AC064836.4	1-263-0-0-0	5	0.0327757	0.0647309
21922	ZFHX2	1-263-0-0-0	5	0.0327757	0.0647309
24060	FURIN	1-263-0-0-0	5	0.0327757	0.0647309
27198	PSMC5	1-263-0-0-0	5	0.0327757	0.0647309
1162	CZIB	1-261-0-0-0	5	0.0617346	0.0827334
6620	NFKBIZ	1-261-0-0-0	5	0.0617346	0.0827334
9084	C5orf67	1-261-0-0-0	5	0.0617346	0.0827334
10668	BTN2A2	1-261-0-0-0	5	0.0617346	0.0827334
21576	AL359513.1	1-261-0-0-0	5	0.0617346	0.0827334
988	AL451062.1	1-257-0-0-0	5	0.0135241	0.0494691
8740	AC099343.4	1-257-0-0-0	5	0.0135241	0.0494691
11314	GSTA4	1-257-0-0-0	5	0.0135241	0.0494691
15778	PAPPA	1-257-0-0-0	5	0.0135241	0.0494691
22608	ERG28	1-257-0-0-0	5	0.0135241	0.0494691
4234	GGCX	1-255-1-0-0	5	0.0247666	0
9029	AC114956.1_flip	1-255-1-0-0	5	0.0247666	0
27880	B4GALT6	1-255-1-0-0	5	0.0247666	0
29689	ZNF284_flip	1-255-1-0-0	5	0.0247666	0
31564	HSF2BP	1-255-1-0-0	5	0.0247666	0
1958	PLEKHO1	1-251-2-0-0	5	0.041307	0.0860792
11290	AL035701.1	1-251-2-0-0	5	0.041307	0.0860792
12764	BAZ1B	1-251-2-0-0	5	0.041307	0.0860792
26404	AC005562.1	1-251-2-0-0	5	0.041307	0.0860792
31228	ARFGAP1	1-251-2-0-0	5	0.041307	0.0860792
869	AL442071.2_flip	1-249-1-0-0	5	0.0508837	0.101545
4987	AGPS_flip	1-249-1-0-0	5	0.0508837	0.101545
10489	ERVFRD-1_flip	1-249-1-0-0	5	0.0508837	0.101545
23777	UBL7-AS1_flip	1-249-1-0-0	5	0.0508837	0.101545
25133	ADGRG1_flip	1-249-1-0-0	5	0.0508837	0.101545
3372	RPS7	1-249-0-0-0	5	0.109556	0
10340	RACK1	1-249-0-0-0	5	0.109556	0
16890	RPS24	1-249-0-0-0	5	0.109556	0
31168	ATP5F1E	1-249-0-0-0	5	0.109556	0
31398	SOD1	1-249-0-0-0	5	0.109556	0
4556	AC016745.2	1-243-0-1-0	5	0.0456608	0
12470	SCRN1	1-243-0-1-0	5	0.0456608	0
19916	ANO6	1-243-0-1-0	5	0.0456608	0
22396	AL359232.1	1-243-0-1-0	5	0.0456608	0
26228	EPN2	1-243-0-1-0	5	0.0456608	0
17583	GATD1_flip	1-243-0-0-0	5	0.036571	0
21250	LATS2	1-243-0-0-0	5	0.036571	0
26095	AC005224.2_flip	1-243-0-0-0	5	0.036571	0
28360	DOHH	1-243-0-0-0	5	0.036571	0
32779	AC231533.1_flip	1-243-0-0-0	5	0.036571	0
9415	KIAA0825_flip	1-237-2-0-0	5	0.039851	0
16908	AL132656.3	1-237-2-0-0	5	0.039851	0
18197	PRPF19_flip	1-237-2-0-0	5	0.039851	0
32798	PRAF2	1-237-2-0-0	5	0.039851	0
33406	CCNQ	1-237-2-0-0	5	0.039851	0
644	AL360012.1	1-231-0-0-0	5	0.0467745	0.101647
778	TFAP2E	1-231-0-0-0	5	0.0467745	0.101647
6178	UQCRC1	1-231-0-0-0	5	0.0467745	0.101647
13028	MCM7	1-231-0-0-0	5	0.0467745	0.101647
33030	ITM2A	1-231-0-0-0	5	0.0467745	0.101647
6259	MON1A_flip	1-230-3-0-0	5	0.0399501	0
20901	AC004551.1_flip	1-230-3-0-0	5	0.0399501	0
24691	EARS2_flip	1-230-3-0-0	5	0.0399501	0
24737	IL4R_flip	1-230-3-0-0	5	0.0399501	0
25323	COG8_flip	1-230-3-0-0	5	0.0399501	0
6258	MON1A	1-229-4-0-0	5	0.0399501	0
20900	AC004551.1	1-229-4-0-0	5	0.0399501	0
24690	EARS2	1-229-4-0-0	5	0.0399501	0
24736	IL4R	1-229-4-0-0	5	0.0399501	0
25322	COG8	1-229-4-0-0	5	0.0399501	0
3423	RRM2_flip	1-217-2-0-0	5	0.052801	0
4156	SLC4A5	1-217-2-0-0	5	0.052801	0
5551	HJURP_flip	1-217-2-0-0	5	0.052801	0
18942	DYNC2H1	1-217-2-0-0	5	0.052801	0
30713	AL117381.1_flip	1-217-2-0-0	5	0.052801	0
9096	GPBP1	1-215-0-0-0	5	0.0678	0
17754	TMEM9B	1-215-0-0-0	5	0.0678	0
31214	COL9A3	1-215-0-0-0	5	0.0678	0
32326	PARVB	1-215-0-0-0	5	0.0678	0
33534	TTTY14	1-215-0-0-0	5	0.0678	0
12580	MRPL32	1-21-20-0-0	5	0.0436377	0
15785	AL133284.1_flip	1-21-20-0-0	5	0.0436377	0
16970	IFIT2	1-21-20-0-0	5	0.0436377	0
27051	AC015912.3_flip	1-21-20-0-0	5	0.0436377	0
33147	IL1RAPL2_flip	1-21-20-0-0	5	0.0436377	0
4586	STEAP3	1-21-13-0-0	5	0.0401673	0
8310	CXXC4-AS1	1-21-13-0-0	5	0.0401673	0
22704	EML5	1-21-13-0-0	5	0.0401673	0
24262	HAGH	1-21-13-0-0	5	0.0401673	0
28612	ZNF846	1-21-13-0-0	5	0.0401673	0
5377	CNOT9_flip	1-208-0-0-0	5	0.067669	0
10562	RNF144B	1-208-0-0-0	5	0.067669	0
13677	TMUB1_flip	1-208-0-0-0	5	0.067669	0
25033	TENT4B_flip	1-208-0-0-0	5	0.067669	0
27749	AP005899.1_flip	1-208-0-0-0	5	0.067669	0
6185	LINC02585_flip	1-203-2-0-0	5	0.0471572	0
18020	ACCS	1-203-2-0-0	5	0.0471572	0
27069	MRPS23_flip	1-203-2-0-0	5	0.0471572	0
29531	DYRK1B_flip	1-203-2-0-0	5	0.0471572	0
29912	GYS1	1-203-2-0-0	5	0.0471572	0
10338	TRIM41	1-2-9-0-0	5	0.045553	0
13478	CREB3L2	1-2-9-0-0	5	0.045553	0
15424	GNAQ	1-2-9-0-0	5	0.045553	0
27848	RMC1	1-2-9-0-0	5	0.045553	0
29726	PPP1R37	1-2-9-0-0	5	0.045553	0
5446	WDFY1	1-2-8-0-0	5	0.0639652	0.0921693
11040	ILRUN	1-2-8-0-0	5	0.0639652	0.0921693
16420	PTER	1-2-8-0-0	5	0.0639652	0.0921693
17990	TRIM44	1-2-8-0-0	5	0.0639652	0.0921693
29246	CEP89	1-2-8-0-0	5	0.0639652	0.0921693
3446	LPIN1	1-2-2-2-0	5	0.0696455	0.113675
6136	SETD2	1-2-2-2-0	5	0.0696455	0.113675
8918	GOLPH3	1-2-2-2-0	5	0.0696455	0.113675
23088	LINC02256	1-2-2-2-0	5	0.0696455	0.113675
27122	VMP1	1-2-2-2-0	5	0.0696455	0.113675
238	PEX14	1-2-2-1-0	5	0.0704819	0.100603
496	NIPAL3	1-2-2-1-0	5	0.0704819	0.100603
5540	INPP5D	1-2-2-1-0	5	0.0704819	0.100603
12314	UMAD1	1-2-2-1-0	5	0.0704819	0.100603
28732	ZNF439	1-2-2-1-0	5	0.0704819	0.100603
17502	ADAM8	1-2-16-0-0	5	0.0587897	0.0804126
17572	DEAF1	1-2-16-0-0	5	0.0587897	0.0804126
22744	CCDC88C	1-2-16-0-0	5	0.0587897	0.0804126
23848	PEAK1	1-2-16-0-0	5	0.0587897	0.0804126
29812	SAE1	1-2-16-0-0	5	0.0587897	0.0804126
8196	PTPN13	1-2-14-0-0	5	0.0529705	0
9748	TXNDC15	1-2-14-0-0	5	0.0529705	0
13104	CLDN15	1-2-14-0-0	5	0.0529705	0
22220	AL365295.1	1-2-14-0-0	5	0.0529705	0
25116	RSPRY1	1-2-14-0-0	5	0.0529705	0
11797	AKAP7_flip	1-197-6-0-0	5	0.141023	0
20661	NEDD1_flip	1-197-6-0-0	5	0.141023	0
20894	RPL6	1-197-6-0-0	5	0.141023	0
25139	USB1_flip	1-197-6-0-0	5	0.141023	0
31446	ATP5PO	1-197-6-0-0	5	0.141023	0
2802	AL606489.1	1-197-2-0-0	5	0.0566283	0
16490	ENKUR	1-197-2-0-0	5	0.0566283	0
18930	ANGPTL5	1-197-2-0-0	5	0.0566283	0
21401	NHLRC3_flip	1-197-2-0-0	5	0.0566283	0
30285	ZFP28_flip	1-197-2-0-0	5	0.0566283	0
714	HDAC1	1-193-6-0-0	5	0.0888199	0.110454
1528	SLC35A3	1-193-6-0-0	5	0.0888199	0.110454
9222	PTCD2	1-193-6-0-0	5	0.0888199	0.110454
24886	ITGAL	1-193-6-0-0	5	0.0888199	0.110454
28520	AC119396.1	1-193-6-0-0	5	0.0888199	0.110454
13989	GNRH1_flip	1-192-2-0-0	5	0.0443596	0
24013	MFGE8_flip	1-192-2-0-0	5	0.0443596	0
24796	SPNS1	1-192-2-0-0	5	0.0443596	0
25239	AC027682.4_flip	1-192-2-0-0	5	0.0443596	0
30224	KMT5C	1-192-2-0-0	5	0.0443596	0
6049	VIPR1_flip	1-192-0-0-0	5	0.00759141	0.06696
7009	SLC35G2_flip	1-192-0-0-0	5	0.00759141	0.06696
13871	AC079193.2_flip	1-192-0-0-0	5	0.00759141	0.06696
22491	RGS6_flip	1-192-0-0-0	5	0.00759141	0.06696
22789	ASB2_flip	1-192-0-0-0	5	0.00759141	0.06696
968	EBNA1BP2	1-191-3-0-0	5	0.0518012	0
1554	AC104506.1	1-191-3-0-0	5	0.0518012	0
13796	MFHAS1	1-191-3-0-0	5	0.0518012	0
19332	ACAD8	1-191-3-0-0	5	0.0518012	0
29746	VASP	1-191-3-0-0	5	0.0518012	0
2578	AL353708.3	1-19-9-0-0	5	0.103933	0
6544	CHMP2B	1-19-9-0-0	5	0.103933	0
13004	ZNF394	1-19-9-0-0	5	0.103933	0
30198	AC011476.3	1-19-9-0-0	5	0.103933	0
33130	MORF4L2	1-19-9-0-0	5	0.103933	0
6644	LINC01215	1-19-0-0-0	5	0.0912663	0.139138
14898	NAPRT	1-19-0-0-0	5	0.0912663	0.139138
16694	UBE2D1	1-19-0-0-0	5	0.0912663	0.139138
30422	CHMP2A	1-19-0-0-0	5	0.0912663	0.139138
33214	UBE2A	1-19-0-0-0	5	0.0912663	0.139138
3875	AC092650.1_flip	1-186-3-0-0	5	0.0610926	0
12882	ABCB4	1-186-3-0-0	5	0.0610926	0
15465	AGTPBP1_flip	1-186-3-0-0	5	0.0610926	0
25472	SYCE1L	1-186-3-0-0	5	0.0610926	0
30913	AL023803.3_flip	1-186-3-0-0	5	0.0610926	0
5503	PSMD1_flip	1-186-2-0-0	5	0.0441791	0
19009	COLCA1_flip	1-186-2-0-0	5	0.0441791	0
23765	STOML1_flip	1-186-2-0-0	5	0.0441791	0
27453	AC005837.1_flip	1-186-2-0-0	5	0.0441791	0
31717	C22orf39_flip	1-186-2-0-0	5	0.0441791	0
4588	STEAP3-AS1	1-183-0-0-0	5	0.0245459	0.0263044
5410	ABCB6	1-183-0-0-0	5	0.0245459	0.0263044
10056	ITK	1-183-0-0-0	5	0.0245459	0.0263044
29972	PNKP	1-183-0-0-0	5	0.0245459	0.0263044
32168	DNAL4	1-183-0-0-0	5	0.0245459	0.0263044
5567	COPS8_flip	1-182-4-0-0	5	0.0856436	0
8103	NUP54_flip	1-182-4-0-0	5	0.0856436	0
20914	TPCN1	1-182-4-0-0	5	0.0856436	0
25086	NUDT21	1-182-4-0-0	5	0.0856436	0
29290	ZNF30	1-182-4-0-0	5	0.0856436	0
15213	FAM219A_flip	1-181-3-0-0	5	0.0535268	0
20962	PEBP1	1-181-3-0-0	5	0.0535268	0
22023	AL121852.1_flip	1-181-3-0-0	5	0.0535268	0
25811	ITGAE_flip	1-181-3-0-0	5	0.0535268	0
27955	SLC14A1_flip	1-181-3-0-0	5	0.0535268	0
448	KDM1A	1-180-1-1-0	5	0.0678764	0
1240	L1TD1	1-180-1-1-0	5	0.0678764	0
4744	ZEB2	1-180-1-1-0	5	0.0678764	0
7250	PRKCI	1-180-1-1-0	5	0.0678764	0
19612	TAS2R46	1-180-1-1-0	5	0.0678764	0
4922	SLC25A12	1-180-1-0-0	5	0.0740795	0.106442
11952	STXBP5	1-180-1-0-0	5	0.0740795	0.106442
15696	TMEM245	1-180-1-0-0	5	0.0740795	0.106442
17934	ELP4	1-180-1-0-0	5	0.0740795	0.106442
33380	MTM1	1-180-1-0-0	5	0.0740795	0.106442
6358	PBRM1	1-170-2-0-0	5	0.0817474	0
24902	ZNF785	1-170-2-0-0	5	0.0817474	0
25818	ATP2A3	1-170-2-0-0	5	0.0817474	0
28914	HSH2D	1-170-2-0-0	5	0.0817474	0
29540	ZNF780B	1-170-2-0-0	5	0.0817474	0
11234	TJAP1	1-170-0-1-0	5	0.0438155	0
12910	MTERF1	1-170-0-1-0	5	0.0438155	0
19966	VDR	1-170-0-1-0	5	0.0438155	0
20064	LETMD1	1-170-0-1-0	5	0.0438155	0
30350	ZNF586	1-170-0-1-0	5	0.0438155	0
20188	CD63	1-169-2-0-0	5	0.0559257	0
22753	TC2N_flip	1-169-2-0-0	5	0.0559257	0
23124	NOP10	1-169-2-0-0	5	0.0559257	0
29197	AC092279.1_flip	1-169-2-0-0	5	0.0559257	0
30268	EDDM13	1-169-2-0-0	5	0.0559257	0
1064	RAD54L	1-169-1-0-0	5	0.0326469	0
18726	POLD3	1-169-1-0-0	5	0.0326469	0
22654	AHSA1	1-169-1-0-0	5	0.0326469	0
23402	FAM227B	1-169-1-0-0	5	0.0326469	0
23674	AC012568.1	1-169-1-0-0	5	0.0326469	0
298	VPS13D	1-167-3-0-0	5	0.0928914	0.137533
3686	AL121658.1	1-167-3-0-0	5	0.0928914	0.137533
15446	GKAP1	1-167-3-0-0	5	0.0928914	0.137533
23672	SMAD3	1-167-3-0-0	5	0.0928914	0.137533
27374	GRB2	1-167-3-0-0	5	0.0928914	0.137533
4270	RMND5A	1-167-0-0-0	5	0.0583601	0.0822353
23884	AC015871.7	1-167-0-0-0	5	0.0583601	0.0822353
24678	NPIPB5	1-167-0-0-0	5	0.0583601	0.0822353
25816	P2RX1	1-167-0-0-0	5	0.0583601	0.0822353
30140	AC008440.1	1-167-0-0-0	5	0.0583601	0.0822353
2416	TMCO1-AS1	1-161-2-0-0	5	0.00941096	0.0434066
3288	KIF26B	1-161-2-0-0	5	0.00941096	0.0434066
7486	AC024937.3	1-161-2-0-0	5	0.00941096	0.0434066
17104	LOXL4	1-161-2-0-0	5	0.00941096	0.0434066
20034	BCDIN3D-AS1	1-161-2-0-0	5	0.00941096	0.0434066
280	CLCN6	1-161-1-1-0	5	0.0649016	0
18630	PPFIA1	1-161-1-1-0	5	0.0649016	0
20010	AC011603.2	1-161-1-1-0	5	0.0649016	0
23082	KLF13	1-161-1-1-0	5	0.0649016	0
23424	TRPM7	1-161-1-1-0	5	0.0649016	0
1909	BCL9_flip	1-16-8-0-0	5	0.0691003	0
11828	LINC01010	1-16-8-0-0	5	0.0691003	0
20432	NUP107	1-16-8-0-0	5	0.0691003	0
27637	CD7_flip	1-16-8-0-0	5	0.0691003	0
32393	Z97192.3_flip	1-16-8-0-0	5	0.0691003	0
6667	PHLDB2_flip	1-16-11-0-0	5	0.0444387	0
28239	GAMT_flip	1-16-11-0-0	5	0.0444387	0
29803	AP2S1_flip	1-16-11-0-0	5	0.0444387	0
30437	SOX12_flip	1-16-11-0-0	5	0.0444387	0
32805	PLP2_flip	1-16-11-0-0	5	0.0444387	0
1172	AC119428.2	1-16-1-0-0	5	0.0819759	0.101747
4948	OLA1	1-16-1-0-0	5	0.0819759	0.101747
5004	TTN-AS1	1-16-1-0-0	5	0.0819759	0.101747
16474	PIP4K2A	1-16-1-0-0	5	0.0819759	0.101747
21456	TSC22D1	1-16-1-0-0	5	0.0819759	0.101747
4828	BAZ2B	1-16-0-1-0	5	0.090735	0
12282	GRID2IP	1-16-0-1-0	5	0.090735	0
13376	STRIP2	1-16-0-1-0	5	0.090735	0
21945	PSME1_flip	1-16-0-1-0	5	0.090735	0
28227	ATP5F1D_flip	1-16-0-1-0	5	0.090735	0
14568	AP003352.1	1-159-5-0-0	5	0.0101671	0
16300	AL596094.1	1-159-5-0-0	5	0.0101671	0
18654	IL18BP	1-159-5-0-0	5	0.0101671	0
23376	AC090527.3	1-159-5-0-0	5	0.0101671	0
29894	AC026803.3	1-159-5-0-0	5	0.0101671	0
2192	YY1AP1	1-159-0-0-0	5	0.0352547	0.1236
10374	WRNIP1	1-159-0-0-0	5	0.0352547	0.1236
19676	AC010168.1	1-159-0-0-0	5	0.0352547	0.1236
27030	AC006141.1	1-159-0-0-0	5	0.0352547	0.1236
32772	WDR13	1-159-0-0-0	5	0.0352547	0.1236
1186	TMEM59	1-157-1-0-0	5	0.0631188	0.0681546
10252	TMED9	1-157-1-0-0	5	0.0631188	0.0681546
20158	AC023794.1	1-157-1-0-0	5	0.0631188	0.0681546
23552	ANXA2	1-157-1-0-0	5	0.0631188	0.0681546
29034	IFI30	1-157-1-0-0	5	0.0631188	0.0681546
1354	IFI44L	1-152-0-0-0	5	0.105624	0
2718	MIR181A1HG	1-152-0-0-0	5	0.105624	0
5106	STAT1	1-152-0-0-0	5	0.105624	0
6828	PARP14	1-152-0-0-0	5	0.105624	0
21202	PGAM5	1-152-0-0-0	5	0.105624	0
6888	MGLL	1-150-0-0-0	5	0.0695596	0
11631	MICAL1_flip	1-150-0-0-0	5	0.0695596	0
14614	NCALD	1-150-0-0-0	5	0.0695596	0
24988	SHCBP1	1-150-0-0-0	5	0.0695596	0
33325	RTL8C_flip	1-150-0-0-0	5	0.0695596	0
10268	N4BP3	1-147-4-0-0	5	0.0259991	0.0438306
11310	TRAM2-AS1	1-147-4-0-0	5	0.0259991	0.0438306
22644	GSTZ1	1-147-4-0-0	5	0.0259991	0.0438306
27142	AC011921.1	1-147-4-0-0	5	0.0259991	0.0438306
31248	ARFRP1	1-147-4-0-0	5	0.0259991	0.0438306
5718	ARPC4	1-147-1-1-0	5	0.101631	0.223984
14334	SNHG6	1-147-1-1-0	5	0.101631	0.223984
20090	NR4A1	1-147-1-1-0	5	0.101631	0.223984
25998	KDM6B	1-147-1-1-0	5	0.101631	0.223984
32782	PQBP1	1-147-1-1-0	5	0.101631	0.223984
634	SNHG3	1-144-1-0-0	5	0.064644	0.108957
1046	AKR1A1	1-144-1-0-0	5	0.064644	0.108957
8826	LPCAT1	1-144-1-0-0	5	0.064644	0.108957
26770	LINC00910	1-144-1-0-0	5	0.064644	0.108957
28150	NFATC1	1-144-1-0-0	5	0.064644	0.108957
13242	DNAJB9	1-144-0-0-0	5	0.0546436	0.122814
21728	ARGLU1	1-144-0-0-0	5	0.0546436	0.122814
22498	RBM25	1-144-0-0-0	5	0.0546436	0.122814
30418	ZBTB45	1-144-0-0-0	5	0.0546436	0.122814
33308	RAP2C-AS1	1-144-0-0-0	5	0.0546436	0.122814
19889	AC079630.1_flip	1-141-3-0-0	5	0.0217264	0
20165	SCAT2_flip	1-141-3-0-0	5	0.0217264	0
23536	CCNB2	1-141-3-0-0	5	0.0217264	0
27587	AC139530.1_flip	1-141-3-0-0	5	0.0217264	0
32808	CACNA1F	1-141-3-0-0	5	0.0217264	0
9634	C5orf63	1-138-3-0-0	5	0.0364738	0.0703698
18382	PPP2R5B	1-138-3-0-0	5	0.0364738	0.0703698
22040	DTD2	1-138-3-0-0	5	0.0364738	0.0703698
31056	RNF114	1-138-3-0-0	5	0.0364738	0.0703698
31440	DONSON	1-138-3-0-0	5	0.0364738	0.0703698
2549	LINC02803_flip	1-137-2-0-0	5	0.0323986	0.119503
3503	AC018742.1_flip	1-137-2-0-0	5	0.0323986	0.119503
18245	AP001363.1_flip	1-137-2-0-0	5	0.0323986	0.119503
23149	SPRED1_flip	1-137-2-0-0	5	0.0323986	0.119503
24677	AC092338.2_flip	1-137-2-0-0	5	0.0323986	0.119503
9635	C5orf63_flip	1-137-0-0-0	5	0.0364738	0.0703698
18383	PPP2R5B_flip	1-137-0-0-0	5	0.0364738	0.0703698
22041	DTD2_flip	1-137-0-0-0	5	0.0364738	0.0703698
31057	RNF114_flip	1-137-0-0-0	5	0.0364738	0.0703698
31441	DONSON_flip	1-137-0-0-0	5	0.0364738	0.0703698
1220	MYSM1	1-136-1-0-0	5	0.0885798	0
8360	PLA2G12A	1-136-1-0-0	5	0.0885798	0
16586	ZNF37A	1-136-1-0-0	5	0.0885798	0
18728	RNF169	1-136-1-0-0	5	0.0885798	0
32146	DDX17	1-136-1-0-0	5	0.0885798	0
7380	MAP3K13	1-136-0-0-0	5	0.0622009	0
9262	POC5	1-136-0-0-0	5	0.0622009	0
12874	DMTF1	1-136-0-0-0	5	0.0622009	0
21824	TEP1	1-136-0-0-0	5	0.0622009	0
24554	MARF1	1-136-0-0-0	5	0.0622009	0
16434	VIM	1-135-3-0-0	5	0.067787	0
20748	CKAP4	1-135-3-0-0	5	0.067787	0
22982	IGHA1	1-135-3-0-0	5	0.067787	0
31486	CHAF1B	1-135-3-0-0	5	0.067787	0
33414	SSR4	1-135-3-0-0	5	0.067787	0
4320	MRPS5	1-131-1-1-0	5	0.0372472	0
17940	RCN1	1-131-1-1-0	5	0.0372472	0
22860	SLC25A29	1-131-1-1-0	5	0.0372472	0
25758	SERPINF1	1-131-1-1-0	5	0.0372472	0
28696	AC011472.2	1-131-1-1-0	5	0.0372472	0
284	AL021155.5	1-126-0-1-0	5	0.0522938	0.0803536
690	KHDRBS1	1-126-0-1-0	5	0.0522938	0.0803536
6420	ARF4-AS1	1-126-0-1-0	5	0.0522938	0.0803536
21108	SBNO1	1-126-0-1-0	5	0.0522938	0.0803536
28160	SLC66A2	1-126-0-1-0	5	0.0522938	0.0803536
3985	MDH1_flip	1-125-0-1-0	5	0.0353958	0
10740	ZKSCAN3	1-125-0-1-0	5	0.0353958	0
17676	RRM1	1-125-0-1-0	5	0.0353958	0
20211	IKZF4_flip	1-125-0-1-0	5	0.0353958	0
28966	AC020908.3	1-125-0-1-0	5	0.0353958	0
17534	PSMD13	1-120-9-0-0	5	0.0330844	0
19091	APOA1-AS_flip	1-120-9-0-0	5	0.0330844	0
28840	NANOS3	1-120-9-0-0	5	0.0330844	0
29229	AC007773.1_flip	1-120-9-0-0	5	0.0330844	0
30696	LINC01597	1-120-9-0-0	5	0.0330844	0
1740	BCL2L15	1-120-2-0-0	5	0.0600601	0.1078
11774	PTPRK	1-120-2-0-0	5	0.0600601	0.1078
13924	SLC39A14	1-120-2-0-0	5	0.0600601	0.1078
24524	ERCC4	1-120-2-0-0	5	0.0600601	0.1078
31410	URB1	1-120-2-0-0	5	0.0600601	0.1078
14873	THEM6_flip	1-120-0-0-0	5	0.044619	0.0847314
24761	AC020765.2_flip	1-120-0-0-0	5	0.044619	0.0847314
27787	TUBB6_flip	1-120-0-0-0	5	0.044619	0.0847314
29113	AC002306.1_flip	1-120-0-0-0	5	0.044619	0.0847314
29595	B9D2_flip	1-120-0-0-0	5	0.044619	0.0847314
5602	DUSP28	1-12-8-0-0	5	0.0688929	0
15382	AL162390.1	1-12-8-0-0	5	0.0688929	0
23838	SCAPER	1-12-8-0-0	5	0.0688929	0
24594	AC138811.1	1-12-8-0-0	5	0.0688929	0
32506	PNPLA4	1-12-8-0-0	5	0.0688929	0
7502	RNF168	1-12-1-0-0	5	0.0598183	0
14178	SLC20A2	1-12-1-0-0	5	0.0598183	0
29338	LIN37	1-12-1-0-0	5	0.0598183	0
30598	MACROD2	1-12-1-0-0	5	0.0598183	0
33488	VBP1	1-12-1-0-0	5	0.0598183	0
1722	AL390242.1	1-111-3-0-0	5	0.0330511	0.0779524
6036	ZNF620	1-111-3-0-0	5	0.0330511	0.0779524
9094	AC016644.1	1-111-3-0-0	5	0.0330511	0.0779524
26916	SP2-AS1	1-111-3-0-0	5	0.0330511	0.0779524
29254	WDR88	1-111-3-0-0	5	0.0330511	0.0779524
11767	KIAA0408_flip	1-110-3-0-0	5	0.0366156	0
18232	FADS3	1-110-3-0-0	5	0.0366156	0
20874	ALDH2	1-110-3-0-0	5	0.0366156	0
21151	SCARB1_flip	1-110-3-0-0	5	0.0366156	0
28209	WDR18_flip	1-110-3-0-0	5	0.0366156	0
4474	AC009505.1	1-110-0-0-0	5	0.0392034	0
9270	AC025188.1	1-110-0-0-0	5	0.0392034	0
18632	AP002336.2	1-110-0-0-0	5	0.0392034	0
21510	LPAR6	1-110-0-0-0	5	0.0392034	0
24812	NPIPB12	1-110-0-0-0	5	0.0392034	0
9776	AC113382.1	1-103-0-0-0	5	0.0232299	0.0444353
14294	AC022182.2	1-103-0-0-0	5	0.0232299	0.0444353
14310	LINC01414	1-103-0-0-0	5	0.0232299	0.0444353
18136	MED19	1-103-0-0-0	5	0.0232299	0.0444353
22172	AL133485.2	1-103-0-0-0	5	0.0232299	0.0444353
9777	AC113382.1_flip	1-102-0-0-0	5	0.0232299	0.0444353
14295	AC022182.2_flip	1-102-0-0-0	5	0.0232299	0.0444353
14311	LINC01414_flip	1-102-0-0-0	5	0.0232299	0.0444353
18137	MED19_flip	1-102-0-0-0	5	0.0232299	0.0444353
22173	AL133485.2_flip	1-102-0-0-0	5	0.0232299	0.0444353
2306	DCAF8	1-100-6-0-0	5	0.0630224	0.134579
13230	DLD	1-100-6-0-0	5	0.0630224	0.134579
21916	PABPN1	1-100-6-0-0	5	0.0630224	0.134579
22248	FBXO34	1-100-6-0-0	5	0.0630224	0.134579
27746	NDUFV2	1-100-6-0-0	5	0.0630224	0.134579
7772	BST1	1-100-1-0-0	5	0.070194	0
17870	TSG101	1-100-1-0-0	5	0.070194	0
18106	MTCH2	1-100-1-0-0	5	0.070194	0
21180	SFSWAP	1-100-1-0-0	5	0.070194	0
23010	IGHV4-39	1-100-1-0-0	5	0.070194	0
2090	GATAD2B	1-100-0-0-0	5	0.0687926	0
3404	ADAM17	1-100-0-0-0	5	0.0687926	0
7988	SRD5A3	1-100-0-0-0	5	0.0687926	0
24004	DET1	1-100-0-0-0	5	0.0687926	0
24950	KAT8	1-100-0-0-0	5	0.0687926	0
7454	ATP13A3	1-10-4-0-0	5	0.0702882	0
9086	MAP3K1	1-10-4-0-0	5	0.0702882	0
9260	ANKDD1B	1-10-4-0-0	5	0.0702882	0
10752	AL645939.5	1-10-4-0-0	5	0.0702882	0
18488	PACS1	1-10-4-0-0	5	0.0702882	0
6492	TAFA1	1-10-21-0-0	5	0.168691	0
12678	NIPSNAP2	1-10-21-0-0	5	0.168691	0
20632	FGD6	1-10-21-0-0	5	0.168691	0
22077	NFKBIA_flip	1-10-21-0-0	5	0.168691	0
28491	ALKBH7_flip	1-10-21-0-0	5	0.168691	0
13318	POT1	1-10-20-0-0	5	0.0770323	0
19756	SSPN	1-10-20-0-0	5	0.0770323	0
20698	WASHC3	1-10-20-0-0	5	0.0770323	0
22042	NUBPL	1-10-20-0-0	5	0.0770323	0
24028	AC087284.1	1-10-20-0-0	5	0.0770323	0
2264	FCRL5	1-10-2-0-0	5	0.0552475	0.143796
4284	CYTOR	1-10-2-0-0	5	0.0552475	0.143796
18376	CDC42BPG	1-10-2-0-0	5	0.0552475	0.143796
19022	ALG9	1-10-2-0-0	5	0.0552475	0.143796
23684	MAP2K5	1-10-2-0-0	5	0.0552475	0.143796
6422	DENND6A	1-10-15-0-0	5	0.0741059	0
9490	PPIP5K2	1-10-15-0-0	5	0.0741059	0
11494	CNR1	1-10-15-0-0	5	0.0741059	0
25030	HEATR3	1-10-15-0-0	5	0.0741059	0
25304	ZFP90	1-10-15-0-0	5	0.0741059	0
8557	RPS3A_flip	1-10-13-0-0	5	0.109701	0
11403	EEF1A1_flip	1-10-13-0-0	5	0.109701	0
14937	MAF1_flip	1-10-13-0-0	5	0.109701	0
32471	SLC25A6_flip	1-10-13-0-0	5	0.109701	0
33509	RPS4Y1_flip	1-10-13-0-0	5	0.109701	0
3268	ZBTB18	1-0-50-0-0	5	0.0454968	0
18828	DLG2	1-0-50-0-0	5	0.0454968	0
25198	CES3	1-0-50-0-0	5	0.0454968	0
25846	PLD2	1-0-50-0-0	5	0.0454968	0
25988	SHBG	1-0-50-0-0	5	0.0454968	0
4960	WIPF1	1-0-41-0-0	5	0.112452	0
5612	SNED1	1-0-41-0-0	5	0.112452	0
13882	PCM1	1-0-41-0-0	5	0.112452	0
23490	CCPG1	1-0-41-0-0	5	0.112452	0
27870	SS18	1-0-41-0-0	5	0.112452	0
1644	LAMTOR5-AS1	1-0-40-0-0	5	0.0759503	0
8986	PRKAA1	1-0-40-0-0	5	0.0759503	0
15074	UHRF2	1-0-40-0-0	5	0.0759503	0
16080	MED27	1-0-40-0-0	5	0.0759503	0
22133	AL139099.2_flip	1-0-40-0-0	5	0.0759503	0
932	SCMH1	1-0-38-0-0	5	0.0628345	0
3534	NCOA1	1-0-38-0-0	5	0.0628345	0
19804	AC009318.1	1-0-38-0-0	5	0.0628345	0
33252	THOC2	1-0-38-0-0	5	0.0628345	0
33526	UTY	1-0-38-0-0	5	0.0628345	0
3298	CNST	1-0-33-0-0	5	0.0811358	0
5958	LINC01811	1-0-33-0-0	5	0.0811358	0
11906	VTA1	1-0-33-0-0	5	0.0811358	0
27968	PIAS2	1-0-33-0-0	5	0.0811358	0
28610	ZNF562	1-0-33-0-0	5	0.0811358	0
3822	PPM1B	1-0-29-0-0	5	0.0802807	0.0575656
5946	SUSD5	1-0-29-0-0	5	0.0802807	0.0575656
9234	UTP15	1-0-29-0-0	5	0.0802807	0.0575656
11380	OGFRL1	1-0-29-0-0	5	0.0802807	0.0575656
13728	RBM33	1-0-29-0-0	5	0.0802807	0.0575656
554	CRYBG2	1-0-16-0-0	5	0.0306374	0
6816	WDR5B	1-0-16-0-0	5	0.0306374	0
13974	SLC25A37	1-0-16-0-0	5	0.0306374	0
30504	UBOX5	1-0-16-0-0	5	0.0306374	0
33542	TTTY10	1-0-16-0-0	5	0.0306374	0
11472	SNHG5	1-99-1-0-0	4	0.102334	0.21818
20026	FAM186B	1-99-1-0-0	4	0.102334	0.21818
22792	DDX24	1-99-1-0-0	4	0.102334	0.21818
27482	SYNGR2	1-99-1-0-0	4	0.102334	0.21818
4975	LINC01117_flip	1-95-4-0-0	4	0.0498879	0.0717056
18145	CTNND1_flip	1-95-4-0-0	4	0.0498879	0.0717056
27283	PRKAR1A_flip	1-95-4-0-0	4	0.0498879	0.0717056
32071	FOXRED2_flip	1-95-4-0-0	4	0.0498879	0.0717056
4974	LINC01117	1-94-5-0-0	4	0.0498879	0.0717056
18144	CTNND1	1-94-5-0-0	4	0.0498879	0.0717056
27282	PRKAR1A	1-94-5-0-0	4	0.0498879	0.0717056
32070	FOXRED2	1-94-5-0-0	4	0.0498879	0.0717056
2989	BPNT1_flip	1-93-0-0-1	4	0.0283547	0.0957471
4653	AC012306.3_flip	1-93-0-0-1	4	0.0283547	0.0957471
5373	CTDSP1_flip	1-93-0-0-1	4	0.0283547	0.0957471
28817	LYL1_flip	1-93-0-0-1	4	0.0283547	0.0957471
6317	PARP3_flip	1-91-1-0-0	4	0.0150856	0.0716628
12759	AC211476.2_flip	1-91-1-0-0	4	0.0150856	0.0716628
29501	SARS2_flip	1-91-1-0-0	4	0.0150856	0.0716628
30987	ZSWIM1_flip	1-91-1-0-0	4	0.0150856	0.0716628
12806	GTF2IRD2B	1-86-1-0-0	4	0.0309451	0.0791054
13842	FAM167A	1-86-1-0-0	4	0.0309451	0.0791054
14858	AC040970.1	1-86-1-0-0	4	0.0309451	0.0791054
32896	FAAH2	1-86-1-0-0	4	0.0309451	0.0791054
6347	BAP1_flip	1-85-6-0-0	4	0.0281148	0.138824
10107	MIR3142HG_flip	1-85-6-0-0	4	0.0281148	0.138824
20199	MMP19_flip	1-85-6-0-0	4	0.0281148	0.138824
20427	AC008033.3_flip	1-85-6-0-0	4	0.0281148	0.138824
1042	MMACHC	1-85-0-0-0	4	0.0299499	0.0356951
5382	ZNF142	1-85-0-0-0	4	0.0299499	0.0356951
22154	L2HGDH	1-85-0-0-0	4	0.0299499	0.0356951
23980	ZNF592	1-85-0-0-0	4	0.0299499	0.0356951
6774	AC023494.1	1-84-1-0-0	4	0.0123458	0.0535682
14290	AC113143.3	1-84-1-0-0	4	0.0123458	0.0535682
28500	TNFSF9	1-84-1-0-0	4	0.0123458	0.0535682
29424	LINC01535	1-84-1-0-0	4	0.0123458	0.0535682
7906	NSUN7	1-79-2-0-1	4	0.0166136	0.0539784
12012	FBXO5	1-79-2-0-1	4	0.0166136	0.0539784
19040	TEX12	1-79-2-0-1	4	0.0166136	0.0539784
26204	FOXO3B	1-79-2-0-1	4	0.0166136	0.0539784
6788	HGD	1-77-6-0-0	4	0.0936632	0.126473
13982	AC120193.1	1-77-6-0-0	4	0.0936632	0.126473
18936	BIRC2	1-77-6-0-0	4	0.0936632	0.126473
26388	AC104982.2	1-77-6-0-0	4	0.0936632	0.126473
11154	FOXP4-AS1	1-74-3-0-0	4	0.0408727	0.104847
20044	AC074032.1	1-74-3-0-0	4	0.0408727	0.104847
20938	C12orf49	1-74-3-0-0	4	0.0408727	0.104847
23978	AC012291.3	1-74-3-0-0	4	0.0408727	0.104847
22451	PLEKHD1_flip	1-70-6-0-0	4	0.0186722	0.0596532
26379	TP53I13_flip	1-70-6-0-0	4	0.0186722	0.0596532
31159	AL121917.1_flip	1-70-6-0-0	4	0.0186722	0.0596532
33379	MAMLD1_flip	1-70-6-0-0	4	0.0186722	0.0596532
396	AL031727.2	1-7-6-0-0	4	0.0618661	0.115158
2538	Z99127.4	1-7-6-0-0	4	0.0618661	0.115158
22336	HIF1A	1-7-6-0-0	4	0.0618661	0.115158
27116	AC091271.1	1-7-6-0-0	4	0.0618661	0.115158
10432	NRN1	1-7-18-0-0	4	0.0172818	0.0662232
10542	AL137003.2	1-7-18-0-0	4	0.0172818	0.0662232
23618	PIF1	1-7-18-0-0	4	0.0172818	0.0662232
27012	AC005921.2	1-7-18-0-0	4	0.0172818	0.0662232
1818	SEC22B	1-7-15-0-0	4	0.0537542	0.116421
7598	CTBP1	1-7-15-0-0	4	0.0537542	0.116421
8658	NEK1	1-7-15-0-0	4	0.0537542	0.116421
15054	PLGRKT	1-7-15-0-0	4	0.0537542	0.116421
15414	RFK	1-7-13-0-0	4	0.0614023	0.0669703
26428	OMG	1-7-13-0-0	4	0.0614023	0.0669703
30892	RPRD1B	1-7-13-0-0	4	0.0614023	0.0669703
32716	JADE3	1-7-13-0-0	4	0.0614023	0.0669703
9400	ARRDC3-AS1	1-7-11-0-0	4	0.0449478	0.0856587
20240	CS	1-7-11-0-0	4	0.0449478	0.0856587
32472	LINC00106	1-7-11-0-0	4	0.0449478	0.0856587
32794	TFE3	1-7-11-0-0	4	0.0449478	0.0856587
3764	ATL2	1-68-9-0-0	4	0.0464651	0.0828267
14458	AC011773.4	1-68-9-0-0	4	0.0464651	0.0828267
22092	AL109628.2	1-68-9-0-0	4	0.0464651	0.0828267
26356	PIPOX	1-68-9-0-0	4	0.0464651	0.0828267
2776	ADIPOR1	1-68-1-0-0	4	0.0433249	0.0740271
10914	ATF6B	1-68-1-0-0	4	0.0433249	0.0740271
22910	AL139300.2	1-68-1-0-0	4	0.0433249	0.0740271
31172	ZNF831	1-68-1-0-0	4	0.0433249	0.0740271
3368	RNASEH1-AS1	1-67-4-0-0	4	0.0417346	0.101237
11186	PRPH2	1-67-4-0-0	4	0.0417346	0.101237
19404	TIGAR	1-67-4-0-0	4	0.0417346	0.101237
30154	CNOT3	1-67-4-0-0	4	0.0417346	0.101237
15113	RRAGA_flip	1-64-7-0-0	4	0.0455532	0.115489
17641	CD81_flip	1-64-7-0-0	4	0.0455532	0.115489
18257	B3GAT3_flip	1-64-7-0-0	4	0.0455532	0.115489
31775	HIC2_flip	1-64-7-0-0	4	0.0455532	0.115489
8238	AC004054.1	1-606-0-0-0	4	0.00578188	0
12042	AL355297.4	1-606-0-0-0	4	0.00578188	0
[truncated: 458 more rows]

## Sheet: filtered_NK_NKT
	gene	clustering results	the numbers of genes	The cohesion of the last layer	The separation of the last layer
2184	AHCYL1	1-65-0-0-0	48	0.0668869	0.0726543
3884	LPGAT1	1-65-0-0-0	48	0.0668869	0.0726543
5406	AAK1	1-65-0-0-0	48	0.0668869	0.0726543
5896	AC007278.2	1-65-0-0-0	48	0.0668869	0.0726543
6808	ANKRD44	1-65-0-0-0	48	0.0668869	0.0726543
7012	AC007038.2	1-65-0-0-0	48	0.0668869	0.0726543
7014	AC007038.1	1-65-0-0-0	48	0.0668869	0.0726543
7884	GPD1L	1-65-0-0-0	48	0.0668869	0.0726543
7964	SLC22A13	1-65-0-0-0	48	0.0668869	0.0726543
10434	LDB2	1-65-0-0-0	48	0.0668869	0.0726543
10592	UBE2K	1-65-0-0-0	48	0.0668869	0.0726543
11080	RAP1GDS1	1-65-0-0-0	48	0.0668869	0.0726543
11082	TSPAN5	1-65-0-0-0	48	0.0668869	0.0726543
12148	AC008957.1	1-65-0-0-0	48	0.0668869	0.0726543
12692	XRCC4	1-65-0-0-0	48	0.0668869	0.0726543
12982	COMMD10	1-65-0-0-0	48	0.0668869	0.0726543
15798	MAN1A1	1-65-0-0-0	48	0.0668869	0.0726543
16210	ZDHHC14	1-65-0-0-0	48	0.0668869	0.0726543
16234	TMEM181	1-65-0-0-0	48	0.0668869	0.0726543
16248	RSPH3	1-65-0-0-0	48	0.0668869	0.0726543
18044	ZC3HC1	1-65-0-0-0	48	0.0668869	0.0726543
18576	PRAG1	1-65-0-0-0	48	0.0668869	0.0726543
19988	TMEM71	1-65-0-0-0	48	0.0668869	0.0726543
20494	APTX	1-65-0-0-0	48	0.0668869	0.0726543
20688	CBWD6	1-65-0-0-0	48	0.0668869	0.0726543
22214	PIP4K2A	1-65-0-0-0	48	0.0668869	0.0726543
22884	NUTM2A-AS1	1-65-0-0-0	48	0.0668869	0.0726543
24220	TCP11L1	1-65-0-0-0	48	0.0668869	0.0726543
26824	TMEM117	1-65-0-0-0	48	0.0668869	0.0726543
27422	SLC16A7	1-65-0-0-0	48	0.0668869	0.0726543
27484	LEMD3	1-65-0-0-0	48	0.0668869	0.0726543
27530	LINC02384	1-65-0-0-0	48	0.0668869	0.0726543
27700	CEP290	1-65-0-0-0	48	0.0668869	0.0726543
27968	RIC8B	1-65-0-0-0	48	0.0668869	0.0726543
29794	PRORP	1-65-0-0-0	48	0.0668869	0.0726543
30714	TC2N	1-65-0-0-0	48	0.0668869	0.0726543
31126	AC127502.2	1-65-0-0-0	48	0.0668869	0.0726543
31956	SMAD3	1-65-0-0-0	48	0.0668869	0.0726543
32990	AC108134.3	1-65-0-0-0	48	0.0668869	0.0726543
33610	AC009093.2	1-65-0-0-0	48	0.0668869	0.0726543
36622	ZNF652	1-65-0-0-0	48	0.0668869	0.0726543
36636	SPOP	1-65-0-0-0	48	0.0668869	0.0726543
38084	HDHD2	1-65-0-0-0	48	0.0668869	0.0726543
42920	BRWD1	1-65-0-0-0	48	0.0668869	0.0726543
44004	KIAA0930	1-65-0-0-0	48	0.0668869	0.0726543
44074	Z97192.2	1-65-0-0-0	48	0.0668869	0.0726543
44650	FAM156A	1-65-0-0-0	48	0.0668869	0.0726543
44982	ZMAT1	1-65-0-0-0	48	0.0668869	0.0726543
2006	ABCD3	1-16-0-0-0	48	0.0526466	0.0595285
3518	EDEM3	1-16-0-0-0	48	0.0526466	0.0595285
3542	AL096803.2	1-16-0-0-0	48	0.0526466	0.0595285
7032	AC108066.2	1-16-0-0-0	48	0.0526466	0.0595285
7248	RHBDD1	1-16-0-0-0	48	0.0526466	0.0595285
7786	TBC1D5	1-16-0-0-0	48	0.0526466	0.0595285
7916	PDCD6IP	1-16-0-0-0	48	0.0526466	0.0595285
7934	LRRFIP2	1-16-0-0-0	48	0.0526466	0.0595285
8130	SACM1L	1-16-0-0-0	48	0.0526466	0.0595285
8606	SUCLG2	1-16-0-0-0	48	0.0526466	0.0595285
8636	FOXP1	1-16-0-0-0	48	0.0526466	0.0595285
8648	EIF4E3	1-16-0-0-0	48	0.0526466	0.0595285
8826	BBX	1-16-0-0-0	48	0.0526466	0.0595285
9084	HACD2	1-16-0-0-0	48	0.0526466	0.0595285
9108	ZNF148	1-16-0-0-0	48	0.0526466	0.0595285
9454	RNF13	1-16-0-0-0	48	0.0526466	0.0595285
10708	SCFD2	1-16-0-0-0	48	0.0526466	0.0595285
11038	FAM13A-AS1	1-16-0-0-0	48	0.0526466	0.0595285
11064	PDLIM5	1-16-0-0-0	48	0.0526466	0.0595285
11148	SLC9B2	1-16-0-0-0	48	0.0526466	0.0595285
12090	ZFR	1-16-0-0-0	48	0.0526466	0.0595285
12280	EMB	1-16-0-0-0	48	0.0526466	0.0595285
12602	AGGF1	1-16-0-0-0	48	0.0526466	0.0595285
12636	TENT2	1-16-0-0-0	48	0.0526466	0.0595285
12820	LNPEP	1-16-0-0-0	48	0.0526466	0.0595285
12878	FBXL17	1-16-0-0-0	48	0.0526466	0.0595285
13786	ERGIC1	1-16-0-0-0	48	0.0526466	0.0595285
13860	UIMC1	1-16-0-0-0	48	0.0526466	0.0595285
14040	EXOC2	1-16-0-0-0	48	0.0526466	0.0595285
14054	GMDS	1-16-0-0-0	48	0.0526466	0.0595285
14272	ATXN1	1-16-0-0-0	48	0.0526466	0.0595285
15546	MAP3K7	1-16-0-0-0	48	0.0526466	0.0595285
16290	MAP3K4	1-16-0-0-0	48	0.0526466	0.0595285
19684	NCALD	1-16-0-0-0	48	0.0526466	0.0595285
21242	PTBP3	1-16-0-0-0	48	0.0526466	0.0595285
22706	FAM149B1	1-16-0-0-0	48	0.0526466	0.0595285
23178	BTRC	1-16-0-0-0	48	0.0526466	0.0595285
25370	PICALM	1-16-0-0-0	48	0.0526466	0.0595285
25522	PDGFD	1-16-0-0-0	48	0.0526466	0.0595285
27712	POC1B	1-16-0-0-0	48	0.0526466	0.0595285
32458	AC087284.1	1-16-0-0-0	48	0.0526466	0.0595285
33886	PHKB	1-16-0-0-0	48	0.0526466	0.0595285
35680	NLK	1-16-0-0-0	48	0.0526466	0.0595285
36842	CLTC	1-16-0-0-0	48	0.0526466	0.0595285
38104	DYM	1-16-0-0-0	48	0.0526466	0.0595285
38318	TSHZ1	1-16-0-0-0	48	0.0526466	0.0595285
39862	KIAA0355	1-16-0-0-0	48	0.0526466	0.0595285
42710	AF165147.1	1-16-0-0-0	48	0.0526466	0.0595285
3600	ZBTB41	1-28-0-0-0	44	0.0514246	0.0673942
3866	RCOR3	1-28-0-0-0	44	0.0514246	0.0673942
4386	SMYD3	1-28-0-0-0	44	0.0514246	0.0673942
5308	VPS54	1-28-0-0-0	44	0.0514246	0.0673942
5470	EXOC6B	1-28-0-0-0	44	0.0514246	0.0673942
6222	ZRANB3	1-28-0-0-0	44	0.0514246	0.0673942
6242	AC114763.1	1-28-0-0-0	44	0.0514246	0.0673942
6256	ARHGAP15	1-28-0-0-0	44	0.0514246	0.0673942
6460	CERS6	1-28-0-0-0	44	0.0514246	0.0673942
6694	LINC01473	1-28-0-0-0	44	0.0514246	0.0673942
8914	SIDT1	1-28-0-0-0	44	0.0514246	0.0673942
9006	GSK3B	1-28-0-0-0	44	0.0514246	0.0673942
9734	TBL1XR1	1-28-0-0-0	44	0.0514246	0.0673942
11528	LRBA	1-28-0-0-0	44	0.0514246	0.0673942
12076	DROSHA	1-28-0-0-0	44	0.0514246	0.0673942
12432	TRAPPC13	1-28-0-0-0	44	0.0514246	0.0673942
12858	PAM	1-28-0-0-0	44	0.0514246	0.0673942
13092	RAPGEF6	1-28-0-0-0	44	0.0514246	0.0673942
14312	E2F3	1-28-0-0-0	44	0.0514246	0.0673942
16090	UST	1-28-0-0-0	44	0.0514246	0.0673942
16854	AVL9	1-28-0-0-0	44	0.0514246	0.0673942
17982	SND1	1-28-0-0-0	44	0.0514246	0.0673942
18028	AHCYL2	1-28-0-0-0	44	0.0514246	0.0673942
21694	MED27	1-28-0-0-0	44	0.0514246	0.0673942
22904	ATAD1	1-28-0-0-0	44	0.0514246	0.0673942
23348	VTI1A	1-28-0-0-0	44	0.0514246	0.0673942
23970	SBF2	1-28-0-0-0	44	0.0514246	0.0673942
24022	BTBD10	1-28-0-0-0	44	0.0514246	0.0673942
25396	TMEM135	1-28-0-0-0	44	0.0514246	0.0673942
26684	CCDC91	1-28-0-0-0	44	0.0514246	0.0673942
28892	TSC22D1	1-28-0-0-0	44	0.0514246	0.0673942
30070	EXOC5	1-28-0-0-0	44	0.0514246	0.0673942
30076	NAA30	1-28-0-0-0	44	0.0514246	0.0673942
30346	PCNX1	1-28-0-0-0	44	0.0514246	0.0673942
30618	LINC02328	1-28-0-0-0	44	0.0514246	0.0673942
31970	MAP2K5	1-28-0-0-0	44	0.0514246	0.0673942
32552	MCTP2	1-28-0-0-0	44	0.0514246	0.0673942
33534	KIAA0556	1-28-0-0-0	44	0.0514246	0.0673942
35138	RABEP1	1-28-0-0-0	44	0.0514246	0.0673942
39754	ZNF254	1-28-0-0-0	44	0.0514246	0.0673942
40940	ZNF613	1-28-0-0-0	44	0.0514246	0.0673942
44542	ZNF182	1-28-0-0-0	44	0.0514246	0.0673942
44898	BRWD3	1-28-0-0-0	44	0.0514246	0.0673942
45534	UTY	1-28-0-0-0	44	0.0514246	0.0673942
530	TMCO4	1-1-0-0-0	44	0.0691297	0.082474
3254	RCSD1	1-1-0-0-0	44	0.0691297	0.082474
4014	AIDA	1-1-0-0-0	44	0.0691297	0.082474
5394	ARHGAP25	1-1-0-0-0	44	0.0691297	0.082474
5698	CYTOR	1-1-0-0-0	44	0.0691297	0.082474
6736	PMS1	1-1-0-0-0	44	0.0691297	0.082474
7672	VGLL4	1-1-0-0-0	44	0.0691297	0.082474
7698	IQSEC1	1-1-0-0-0	44	0.0691297	0.082474
8182	SCAP	1-1-0-0-0	44	0.0691297	0.082474
8444	PBRM1	1-1-0-0-0	44	0.0691297	0.082474
8494	ARHGEF3	1-1-0-0-0	44	0.0691297	0.082474
8610	TAFA1	1-1-0-0-0	44	0.0691297	0.082474
10062	UBXN7	1-1-0-0-0	44	0.0691297	0.082474
12716	TMEM161B-AS1	1-1-0-0-0	44	0.0691297	0.082474
12746	ARRDC3-AS1	1-1-0-0-0	44	0.0691297	0.082474
12788	RHOBTB3	1-1-0-0-0	44	0.0691297	0.082474
13572	SLC36A1	1-1-0-0-0	44	0.0691297	0.082474
15082	MED20	1-1-0-0-0	44	0.0691297	0.082474
15538	CASP8AP2	1-1-0-0-0	44	0.0691297	0.082474
16144	RMND1	1-1-0-0-0	44	0.0691297	0.082474
16482	FOXK1	1-1-0-0-0	44	0.0691297	0.082474
17102	IKZF1	1-1-0-0-0	44	0.0691297	0.082474
17744	FAM185A	1-1-0-0-0	44	0.0691297	0.082474
18858	PTK2B	1-1-0-0-0	44	0.0691297	0.082474
20724	CBWD5	1-1-0-0-0	44	0.0691297	0.082474
22242	APBB1IP	1-1-0-0-0	44	0.0691297	0.082474
23156	SLF2	1-1-0-0-0	44	0.0691297	0.082474
23628	MTG1	1-1-0-0-0	44	0.0691297	0.082474
25094	PPFIA1	1-1-0-0-0	44	0.0691297	0.082474
25670	USP28	1-1-0-0-0	44	0.0691297	0.082474
25986	FLI1	1-1-0-0-0	44	0.0691297	0.082474
26750	BICD1	1-1-0-0-0	44	0.0691297	0.082474
28554	GOLGA3	1-1-0-0-0	44	0.0691297	0.082474
34292	ZFP90	1-1-0-0-0	44	0.0691297	0.082474
34468	WDR59	1-1-0-0-0	44	0.0691297	0.082474
37192	GRB2	1-1-0-0-0	44	0.0691297	0.082474
39422	EPS15L1	1-1-0-0-0	44	0.0691297	0.082474
40562	PPP5C	1-1-0-0-0	44	0.0691297	0.082474
40594	ARHGAP35	1-1-0-0-0	44	0.0691297	0.082474
43288	YPEL1	1-1-0-0-0	44	0.0691297	0.082474
43438	MIATNB	1-1-0-0-0	44	0.0691297	0.082474
43908	WBP2NL	1-1-0-0-0	44	0.0691297	0.082474
45152	SEPTIN6	1-1-0-0-0	44	0.0691297	0.082474
45276	FAM122B	1-1-0-0-0	44	0.0691297	0.082474
1328	RPS8	1-11-0-0-0	43	0.0749466	0.197052
1972	RPL5	1-11-0-0-0	43	0.0749466	0.197052
4500	RPS7	1-11-0-0-0	43	0.0749466	0.197052
5210	RPS27A	1-11-0-0-0	43	0.0749466	0.197052
5870	RPL31	1-11-0-0-0	43	0.0749466	0.197052
7826	RPL15	1-11-0-0-0	43	0.0749466	0.197052
8022	RPL14	1-11-0-0-0	43	0.0749466	0.197052
10128	RPL35A	1-11-0-0-0	43	0.0749466	0.197052
12198	RPL37	1-11-0-0-0	43	0.0749466	0.197052
13540	RPS14	1-11-0-0-0	43	0.0749466	0.197052
17976	ARF5	1-11-0-0-0	43	0.0749466	0.197052
19174	RPS20	1-11-0-0-0	43	0.0749466	0.197052
19334	RPL7	1-11-0-0-0	43	0.0749466	0.197052
19618	RPL30	1-11-0-0-0	43	0.0749466	0.197052
20234	RPL8	1-11-0-0-0	43	0.0749466	0.197052
21730	RPL7A	1-11-0-0-0	43	0.0749466	0.197052
21856	CLIC3	1-11-0-0-0	43	0.0749466	0.197052
23728	RPLP2	1-11-0-0-0	43	0.0749466	0.197052
23928	RPL27A	1-11-0-0-0	43	0.0749466	0.197052
24056	RPS13	1-11-0-0-0	43	0.0749466	0.197052
24636	EEF1G	1-11-0-0-0	43	0.0749466	0.197052
25234	RPS3	1-11-0-0-0	43	0.0749466	0.197052
25800	RPS25	1-11-0-0-0	43	0.0749466	0.197052
27266	RPL41	1-11-0-0-0	43	0.0749466	0.197052
28686	RPL21	1-11-0-0-0	43	0.0749466	0.197052
32002	RPLP1	1-11-0-0-0	43	0.0749466	0.197052
32738	STUB1	1-11-0-0-0	43	0.0749466	0.197052
32850	RPS2	1-11-0-0-0	43	0.0749466	0.197052
33336	RPS15A	1-11-0-0-0	43	0.0749466	0.197052
34832	RPL13	1-11-0-0-0	43	0.0749466	0.197052
35336	RPL26	1-11-0-0-0	43	0.0749466	0.197052
36122	RPL23	1-11-0-0-0	43	0.0749466	0.197052
36142	RPL19	1-11-0-0-0	43	0.0749466	0.197052
36338	RPL27	1-11-0-0-0	43	0.0749466	0.197052
37116	RPL38	1-11-0-0-0	43	0.0749466	0.197052
38498	RPS15	1-11-0-0-0	43	0.0749466	0.197052
38938	RPS28	1-11-0-0-0	43	0.0749466	0.197052
39540	RPL18A	1-11-0-0-0	43	0.0749466	0.197052
40200	RPS16	1-11-0-0-0	43	0.0749466	0.197052
40696	RPL18	1-11-0-0-0	43	0.0749466	0.197052
44182	SLC25A6	1-11-0-0-0	43	0.0749466	0.197052
45154	RPL39	1-11-0-0-0	43	0.0749466	0.197052
45438	RPL10	1-11-0-0-0	43	0.0749466	0.197052
1294	ST3GAL3	1-5-0-0-0	38	0.0593994	0.053713
1462	NRDC	1-5-0-0-0	38	0.0593994	0.053713
3032	IFI16	1-5-0-0-0	38	0.0593994	0.053713
4328	OPN3	1-5-0-0-0	38	0.0593994	0.053713
4940	TTC27	1-5-0-0-0	38	0.0593994	0.053713
5822	INPP4A	1-5-0-0-0	38	0.0593994	0.053713
6438	AC009495.3	1-5-0-0-0	38	0.0593994	0.053713
7290	CAB39	1-5-0-0-0	38	0.0593994	0.053713
7806	KAT2B	1-5-0-0-0	38	0.0593994	0.053713
8192	DHX30	1-5-0-0-0	38	0.0593994	0.053713
8534	PXK	1-5-0-0-0	38	0.0593994	0.053713
9958	TPRG1	1-5-0-0-0	38	0.0593994	0.053713
10018	XXYLT1	1-5-0-0-0	38	0.0593994	0.053713
10654	ATP10D	1-5-0-0-0	38	0.0593994	0.053713
12402	KIF2A	1-5-0-0-0	38	0.0593994	0.053713
13646	CYFIP2	1-5-0-0-0	38	0.0593994	0.053713
14970	STK38	1-5-0-0-0	38	0.0593994	0.053713
16920	GPR141	1-5-0-0-0	38	0.0593994	0.053713
18852	DPYSL2	1-5-0-0-0	38	0.0593994	0.053713
20808	OSTF1	1-5-0-0-0	38	0.0593994	0.053713
20956	SPTLC1	1-5-0-0-0	38	0.0593994	0.053713
20996	FAM120A	1-5-0-0-0	38	0.0593994	0.053713
22126	NMT2	1-5-0-0-0	38	0.0593994	0.053713
22140	RSU1	1-5-0-0-0	38	0.0593994	0.053713
22760	VCL	1-5-0-0-0	38	0.0593994	0.053713
23310	ADD3	1-5-0-0-0	38	0.0593994	0.053713
27540	NUP107	1-5-0-0-0	38	0.0593994	0.053713
28654	PARP4	1-5-0-0-0	38	0.0593994	0.053713
28806	SUPT20H	1-5-0-0-0	38	0.0593994	0.053713
31332	DNAJC17	1-5-0-0-0	38	0.0593994	0.053713
33160	ATF7IP2	1-5-0-0-0	38	0.0593994	0.053713
35806	SSH2	1-5-0-0-0	38	0.0593994	0.053713
36514	AC005670.3	1-5-0-0-0	38	0.0593994	0.053713
37976	ZSCAN30	1-5-0-0-0	38	0.0593994	0.053713
42248	NCOA3	1-5-0-0-0	38	0.0593994	0.053713
43166	DGCR2	1-5-0-0-0	38	0.0593994	0.053713
44054	CERK	1-5-0-0-0	38	0.0593994	0.053713
45126	DOCK11	1-5-0-0-0	38	0.0593994	0.053713
3306	KIFAP3	1-18-0-0-0	36	0.055609	0.0647144
3398	COP1	1-18-0-0-0	36	0.055609	0.0647144
3604	DENND1B	1-18-0-0-0	36	0.055609	0.0647144
4170	NUP133	1-18-0-0-0	36	0.055609	0.0647144
4436	TRIM58	1-18-0-0-0	36	0.055609	0.0647144
6170	UGGT1	1-18-0-0-0	36	0.055609	0.0647144
6272	GTDC1	1-18-0-0-0	36	0.055609	0.0647144
6302	AC105402.4	1-18-0-0-0	36	0.055609	0.0647144
8814	CBLB	1-18-0-0-0	36	0.055609	0.0647144
9336	ARMC8	1-18-0-0-0	36	0.055609	0.0647144
10638	GUF1	1-18-0-0-0	36	0.055609	0.0647144
12616	AP3B1	1-18-0-0-0	36	0.055609	0.0647144
12754	FAM172A	1-18-0-0-0	36	0.055609	0.0647144
14316	CDKAL1	1-18-0-0-0	36	0.055609	0.0647144
15412	SENP6	1-18-0-0-0	36	0.055609	0.0647144
16822	ZNRF2	1-18-0-0-0	36	0.055609	0.0647144
18038	NRF1	1-18-0-0-0	36	0.055609	0.0647144
18100	EXOC4	1-18-0-0-0	36	0.055609	0.0647144
20354	KDM4C	1-18-0-0-0	36	0.055609	0.0647144
22270	MPP7	1-18-0-0-0	36	0.055609	0.0647144
22908	PTEN	1-18-0-0-0	36	0.055609	0.0647144
23252	NT5C2	1-18-0-0-0	36	0.055609	0.0647144
24028	FAR1	1-18-0-0-0	36	0.055609	0.0647144
24300	TTC17	1-18-0-0-0	36	0.055609	0.0647144
24368	AMBRA1	1-18-0-0-0	36	0.055609	0.0647144
25348	CCDC90B	1-18-0-0-0	36	0.055609	0.0647144
26556	DERA	1-18-0-0-0	36	0.055609	0.0647144
26608	ETNK1	1-18-0-0-0	36	0.055609	0.0647144
26650	ITPR2	1-18-0-0-0	36	0.055609	0.0647144
27022	DIP2B	1-18-0-0-0	36	0.055609	0.0647144
28704	PAN3	1-18-0-0-0	36	0.055609	0.0647144
29866	FANCM	1-18-0-0-0	36	0.055609	0.0647144
32530	SLCO3A1	1-18-0-0-0	36	0.055609	0.0647144
34480	CFDP1	1-18-0-0-0	36	0.055609	0.0647144
37718	L3MBTL4	1-18-0-0-0	36	0.055609	0.0647144
39828	NUDT19	1-18-0-0-0	36	0.055609	0.0647144
4030	CAPN2	1-13-2-0-0	34	0.0448486	0.0412097
4482	EIPR1	1-13-2-0-0	34	0.0448486	0.0412097
5306	UGP2	1-13-2-0-0	34	0.0448486	0.0412097
6188	PTPN18	1-13-2-0-0	34	0.0448486	0.0412097
9366	PXYLP1	1-13-2-0-0	34	0.0448486	0.0412097
11500	LSM6	1-13-2-0-0	34	0.0448486	0.0412097
12474	CENPH	1-13-2-0-0	34	0.0448486	0.0412097
12730	CETN3	1-13-2-0-0	34	0.0448486	0.0412097
12988	SEMA6A-AS1	1-13-2-0-0	34	0.0448486	0.0412097
13564	ANXA6	1-13-2-0-0	34	0.0448486	0.0412097
13684	TTC1	1-13-2-0-0	34	0.0448486	0.0412097
14342	ACOT13	1-13-2-0-0	34	0.0448486	0.0412097
14638	LINC00243	1-13-2-0-0	34	0.0448486	0.0412097
16884	HERPUD2	1-13-2-0-0	34	0.0448486	0.0412097
17060	MYO1G	1-13-2-0-0	34	0.0448486	0.0412097
18210	NDUFB2-AS1	1-13-2-0-0	34	0.0448486	0.0412097
24204	RCN1	1-13-2-0-0	34	0.0448486	0.0412097
24246	NAT10	1-13-2-0-0	34	0.0448486	0.0412097
25500	CEP126	1-13-2-0-0	34	0.0448486	0.0412097
26862	PCED1B	1-13-2-0-0	34	0.0448486	0.0412097
26980	SPATS2	1-13-2-0-0	34	0.0448486	0.0412097
31168	AC123768.3	1-13-2-0-0	34	0.0448486	0.0412097
34078	USB1	1-13-2-0-0	34	0.0448486	0.0412097
34504	KARS	1-13-2-0-0	34	0.0448486	0.0412097
36586	HOXB3	1-13-2-0-0	34	0.0448486	0.0412097
36816	RAD51C	1-13-2-0-0	34	0.0448486	0.0412097
37200	TMEM94	1-13-2-0-0	34	0.0448486	0.0412097
41004	ZNF600	1-13-2-0-0	34	0.0448486	0.0412097
42254	PREX1	1-13-2-0-0	34	0.0448486	0.0412097
43122	IL17RA	1-13-2-0-0	34	0.0448486	0.0412097
43214	TANGO2	1-13-2-0-0	34	0.0448486	0.0412097
43452	CHEK2	1-13-2-0-0	34	0.0448486	0.0412097
44574	HDAC6	1-13-2-0-0	34	0.0448486	0.0412097
45590	AL592183.1	1-13-2-0-0	34	0.0448486	0.0412097
1200	NFYC	1-16-1-0-0	33	0.0471307	0.0680306
1346	ZSWIM5	1-16-1-0-0	33	0.0471307	0.0680306
3492	SMG7	1-16-1-0-0	33	0.0471307	0.0680306
7020	LANCL1	1-16-1-0-0	33	0.0471307	0.0680306
7862	CMC1	1-16-1-0-0	33	0.0471307	0.0680306
8728	NSUN3	1-16-1-0-0	33	0.0471307	0.0680306
8740	CRYBG3	1-16-1-0-0	33	0.0471307	0.0680306
9570	RSRC1	1-16-1-0-0	33	0.0471307	0.0680306
10616	TMEM33	1-16-1-0-0	33	0.0471307	0.0680306
12524	FCHO2	1-16-1-0-0	33	0.0471307	0.0680306
12572	POLK	1-16-1-0-0	33	0.0471307	0.0680306
15464	DOP1A	1-16-1-0-0	33	0.0471307	0.0680306
15504	RARS2	1-16-1-0-0	33	0.0471307	0.0680306
16038	PEX3	1-16-1-0-0	33	0.0471307	0.0680306
16564	C1GALT1	1-16-1-0-0	33	0.0471307	0.0680306
16596	PHF14	1-16-1-0-0	33	0.0471307	0.0680306
16868	BBS9	1-16-1-0-0	33	0.0471307	0.0680306
17154	ZNF680	1-16-1-0-0	33	0.0471307	0.0680306
17964	POT1	1-16-1-0-0	33	0.0471307	0.0680306
18220	AGK	1-16-1-0-0	33	0.0471307	0.0680306
19134	PCMTD1	1-16-1-0-0	33	0.0471307	0.0680306
20846	UBQLN1	1-16-1-0-0	33	0.0471307	0.0680306
21136	ERP44	1-16-1-0-0	33	0.0471307	0.0680306
22038	TAF3	1-16-1-0-0	33	0.0471307	0.0680306
23036	ZNF518A	1-16-1-0-0	33	0.0471307	0.0680306
23812	ZNF195	1-16-1-0-0	33	0.0471307	0.0680306
26466	ETV6	1-16-1-0-0	33	0.0471307	0.0680306
31190	AVEN	1-16-1-0-0	33	0.0471307	0.0680306
35426	COX10	1-16-1-0-0	33	0.0471307	0.0680306
38226	RELCH	1-16-1-0-0	33	0.0471307	0.0680306
39672	ZNF253	1-16-1-0-0	33	0.0471307	0.0680306
39792	URI1	1-16-1-0-0	33	0.0471307	0.0680306
45328	ATP11C	1-16-1-0-0	33	0.0471307	0.0680306
632	RPL11	1-243-0-0-0	32	0.0819196	0.0697974
730	SH3BGRL3	1-243-0-0-0	32	0.0819196	0.0697974
2754	S100A4	1-243-0-0-0	32	0.0819196	0.0697974
3108	TSTD1	1-243-0-0-0	32	0.0819196	0.0697974
4792	OST4	1-243-0-0-0	32	0.0819196	0.0697974
10422	FGFBP2	1-243-0-0-0	32	0.0819196	0.0697974
10702	DANCR	1-243-0-0-0	32	0.0819196	0.0697974
12322	GZMA	1-243-0-0-0	32	0.0819196	0.0697974
12700	COX7C	1-243-0-0-0	32	0.0819196	0.0697974
17548	ATP5MF	1-243-0-0-0	32	0.0819196	0.0697974
23786	CD81	1-243-0-0-0	32	0.0819196	0.0697974
24726	COX8A	1-243-0-0-0	32	0.0819196	0.0697974
25036	GSTP1	1-243-0-0-0	32	0.0819196	0.0697974
25536	CARD16	1-243-0-0-0	32	0.0819196	0.0697974
27226	CD63	1-243-0-0-0	32	0.0819196	0.0697974
29720	GZMB	1-243-0-0-0	32	0.0819196	0.0697974
29876	RPS29	1-243-0-0-0	32	0.0819196	0.0697974
31280	SRP14	1-243-0-0-0	32	0.0819196	0.0697974
32944	ELOB	1-243-0-0-0	32	0.0819196	0.0697974
36222	KRT10	1-243-0-0-0	32	0.0819196	0.0697974
38888	PET100	1-243-0-0-0	32	0.0819196	0.0697974
39008	UBL5	1-243-0-0-0	32	0.0819196	0.0697974
39264	GADD45GIP1	1-243-0-0-0	32	0.0819196	0.0697974
39470	AC020908.3	1-243-0-0-0	32	0.0819196	0.0697974
39626	RFXANK	1-243-0-0-0	32	0.0819196	0.0697974
39980	TYROBP	1-243-0-0-0	32	0.0819196	0.0697974
42464	RPS21	1-243-0-0-0	32	0.0819196	0.0697974
43498	UQCR10	1-243-0-0-0	32	0.0819196	0.0697974
43698	LGALS1	1-243-0-0-0	32	0.0819196	0.0697974
43792	APOBEC3C	1-243-0-0-0	32	0.0819196	0.0697974
45162	NDUFA1	1-243-0-0-0	32	0.0819196	0.0697974
45410	SSR4	1-243-0-0-0	32	0.0819196	0.0697974
520	CAPZB	1-25-2-0-0	31	0.0325781	0.0307353
2556	NOTCH2NLC	1-25-2-0-0	31	0.0325781	0.0307353
4814	MPV17	1-25-2-0-0	31	0.0325781	0.0307353
8000	SLC25A38	1-25-2-0-0	31	0.0325781	0.0307353
10220	LETM1	1-25-2-0-0	31	0.0325781	0.0307353
12522	AC008972.2	1-25-2-0-0	31	0.0325781	0.0307353
14656	HCG27	1-25-2-0-0	31	0.0325781	0.0307353
15868	ARHGAP18	1-25-2-0-0	31	0.0325781	0.0307353
17080	AC073115.1	1-25-2-0-0	31	0.0325781	0.0307353
18418	ASIC3	1-25-2-0-0	31	0.0325781	0.0307353
20184	HSF1	1-25-2-0-0	31	0.0325781	0.0307353
23576	PPP2R2D	1-25-2-0-0	31	0.0325781	0.0307353
24814	VPS51	1-25-2-0-0	31	0.0325781	0.0307353
25960	FOXRED1	1-25-2-0-0	31	0.0325781	0.0307353
27584	PTPRB	1-25-2-0-0	31	0.0325781	0.0307353
27862	AC010203.2	1-25-2-0-0	31	0.0325781	0.0307353
28080	VPS29	1-25-2-0-0	31	0.0325781	0.0307353
30876	AL132709.8	1-25-2-0-0	31	0.0325781	0.0307353
32804	CCDC154	1-25-2-0-0	31	0.0325781	0.0307353
32914	TBC1D24	1-25-2-0-0	31	0.0325781	0.0307353
35288	NAA38	1-25-2-0-0	31	0.0325781	0.0307353
36050	MYO19	1-25-2-0-0	31	0.0325781	0.0307353
36266	GHDC	1-25-2-0-0	31	0.0325781	0.0307353
36504	FAM215B	1-25-2-0-0	31	0.0325781	0.0307353
36756	SCPEP1	1-25-2-0-0	31	0.0325781	0.0307353
37056	AC007780.1	1-25-2-0-0	31	0.0325781	0.0307353
38718	MPND	1-25-2-0-0	31	0.0325781	0.0307353
39866	GPI	1-25-2-0-0	31	0.0325781	0.0307353
41426	MZF1	1-25-2-0-0	31	0.0325781	0.0307353
43272	LRRC74B	1-25-2-0-0	31	0.0325781	0.0307353
45428	MECP2	1-25-2-0-0	31	0.0325781	0.0307353
6022	ZC3H6	1-87-0-0-0	30	0.0414395	0.0520669
8140	FYCO1	1-87-0-0-0	30	0.0414395	0.0520669
9240	PIK3R4	1-87-0-0-0	30	0.0414395	0.0520669
9328	NCK1	1-87-0-0-0	30	0.0414395	0.0520669
9812	MCCC1	1-87-0-0-0	30	0.0414395	0.0520669
12266	NNT-AS1	1-87-0-0-0	30	0.0414395	0.0520669
12744	ARRDC3	1-87-0-0-0	30	0.0414395	0.0520669
13686	PWWP2A	1-87-0-0-0	30	0.0414395	0.0520669
14034	DUSP22	1-87-0-0-0	30	0.0414395	0.0520669
16390	AC093627.4	1-87-0-0-0	30	0.0414395	0.0520669
16688	KLHL7	1-87-0-0-0	30	0.0414395	0.0520669
17216	TYW1B	1-87-0-0-0	30	0.0414395	0.0520669
19318	MSC-AS1	1-87-0-0-0	30	0.0414395	0.0520669
19710	ATP6V1C1	1-87-0-0-0	30	0.0414395	0.0520669
20230	ZNF251	1-87-0-0-0	30	0.0414395	0.0520669
20334	ERMP1	1-87-0-0-0	30	0.0414395	0.0520669
20482	ACO1	1-87-0-0-0	30	0.0414395	0.0520669
21320	TNFSF8	1-87-0-0-0	30	0.0414395	0.0520669
23542	DHX32	1-87-0-0-0	30	0.0414395	0.0520669
26850	AC008014.1	1-87-0-0-0	30	0.0414395	0.0520669
27856	APAF1	1-87-0-0-0	30	0.0414395	0.0520669
32452	AP3S2	1-87-0-0-0	30	0.0414395	0.0520669
33258	PARN	1-87-0-0-0	30	0.0414395	0.0520669
34806	ACSF3	1-87-0-0-0	30	0.0414395	0.0520669
35460	AC002553.2	1-87-0-0-0	30	0.0414395	0.0520669
35618	ULK2	1-87-0-0-0	30	0.0414395	0.0520669
40398	ZNF283	1-87-0-0-0	30	0.0414395	0.0520669
41958	UQCC1	1-87-0-0-0	30	0.0414395	0.0520669
43854	XPNPEP3	1-87-0-0-0	30	0.0414395	0.0520669
44334	PHKA2	1-87-0-0-0	30	0.0414395	0.0520669
1496	SHISAL2A	1-5-1-0-0	30	0.0530009	0.0617575
1788	PIGK	1-5-1-0-0	30	0.0530009	0.0617575
3896	PPP2R5A	1-5-1-0-0	30	0.0530009	0.0617575
3962	LYPLAL1	1-5-1-0-0	30	0.0530009	0.0617575
5464	ZNF638	1-5-1-0-0	30	0.0530009	0.0617575
6474	FASTKD1	1-5-1-0-0	30	0.0530009	0.0617575
10122	LRCH3	1-5-1-0-0	30	0.0530009	0.0617575
13006	HSD17B4	1-5-1-0-0	30	0.0530009	0.0617575
16082	STXBP5	1-5-1-0-0	30	0.0530009	0.0617575
16188	TFB1M	1-5-1-0-0	30	0.0530009	0.0617575
17034	NUDCD3	1-5-1-0-0	30	0.0530009	0.0617575
17158	ZNF138	1-5-1-0-0	30	0.0530009	0.0617575
17764	ORC5	1-5-1-0-0	30	0.0530009	0.0617575
18504	UBE3C	1-5-1-0-0	30	0.0530009	0.0617575
19474	WWP1	1-5-1-0-0	30	0.0530009	0.0617575
19504	DECR1	1-5-1-0-0	30	0.0530009	0.0617575
19740	OXR1	1-5-1-0-0	30	0.0530009	0.0617575
19962	FAM49B	1-5-1-0-0	30	0.0530009	0.0617575
20950	AUH	1-5-1-0-0	30	0.0530009	0.0617575
23184	FBXW4	1-5-1-0-0	30	0.0530009	0.0617575
23826	STIM1	1-5-1-0-0	30	0.0530009	0.0617575
25262	EMSY	1-5-1-0-0	30	0.0530009	0.0617575
25284	RSF1	1-5-1-0-0	30	0.0530009	0.0617575
26572	AEBP2	1-5-1-0-0	30	0.0530009	0.0617575
26830	ANO6	1-5-1-0-0	30	0.0530009	0.0617575
27894	WASHC3	1-5-1-0-0	30	0.0530009	0.0617575
29414	DCUN1D2	1-5-1-0-0	30	0.0530009	0.0617575
37654	AP005136.3	1-5-1-0-0	30	0.0530009	0.0617575
38088	SMAD2	1-5-1-0-0	30	0.0530009	0.0617575
39816	DPY19L3	1-5-1-0-0	30	0.0530009	0.0617575
200	KCNAB2	1-13-0-0-0	29	0.0698754	0.0668532
858	MECR	1-13-0-0-0	29	0.0698754	0.0668532
1558	SSBP3	1-13-0-0-0	29	0.0698754	0.0668532
3030	PYHIN1	1-13-0-0-0	29	0.0698754	0.0668532
5408	ANXA4	1-13-0-0-0	29	0.0698754	0.0668532
5456	MCEE	1-13-0-0-0	29	0.0698754	0.0668532
6388	AC009961.1	1-13-0-0-0	29	0.0698754	0.0668532
6996	IDH1	1-13-0-0-0	29	0.0698754	0.0668532
7700	NUP210	1-13-0-0-0	29	0.0698754	0.0668532
10224	NELFA	1-13-0-0-0	29	0.0698754	0.0668532
10370	AC005674.2	1-13-0-0-0	29	0.0698754	0.0668532
10478	SEPSECS-AS1	1-13-0-0-0	29	0.0698754	0.0668532
13770	STK10	1-13-0-0-0	29	0.0698754	0.0668532
15684	AK9	1-13-0-0-0	29	0.0698754	0.0668532
16186	AL596202.1	1-13-0-0-0	29	0.0698754	0.0668532
17016	AC004951.1	1-13-0-0-0	29	0.0698754	0.0668532
19926	LINC00861	1-13-0-0-0	29	0.0698754	0.0668532
20110	ZC3H3	1-13-0-0-0	29	0.0698754	0.0668532
22358	ZNF248	1-13-0-0-0	29	0.0698754	0.0668532
27036	SLC11A2	1-13-0-0-0	29	0.0698754	0.0668532
32120	PPCDC	1-13-0-0-0	29	0.0698754	0.0668532
34054	ADGRG5	1-13-0-0-0	29	0.0698754	0.0668532
35842	CRLF3	1-13-0-0-0	29	0.0698754	0.0668532
38870	AC119396.1	1-13-0-0-0	29	0.0698754	0.0668532
39758	LINC00662	1-13-0-0-0	29	0.0698754	0.0668532
40314	CEACAM21	1-13-0-0-0	29	0.0698754	0.0668532
40336	POU2F2	1-13-0-0-0	29	0.0698754	0.0668532
42240	ZMYND8	1-13-0-0-0	29	0.0698754	0.0668532
43828	GRAP2	1-13-0-0-0	29	0.0698754	0.0668532
90	SSU72	1-11-2-0-0	27	0.0476807	0.0392188
2506	NOTCH2NLA	1-11-2-0-0	27	0.0476807	0.0392188
3360	GAS5	1-11-2-0-0	27	0.0476807	0.0392188
3674	ARL8A	1-11-2-0-0	27	0.0476807	0.0392188
4656	TTC32	1-11-2-0-0	27	0.0476807	0.0392188
4994	CDC42EP3	1-11-2-0-0	27	0.0476807	0.0392188
5668	AC009309.1	1-11-2-0-0	27	0.0476807	0.0392188
7614	TADA3	1-11-2-0-0	27	0.0476807	0.0392188
8470	TKT	1-11-2-0-0	27	0.0476807	0.0392188
13764	NPM1	1-11-2-0-0	27	0.0476807	0.0392188
14582	ZNRD1	1-11-2-0-0	27	0.0476807	0.0392188
18548	MYOM2	1-11-2-0-0	27	0.0476807	0.0392188
20884	GOLM1	1-11-2-0-0	27	0.0476807	0.0392188
28614	SAP18	1-11-2-0-0	27	0.0476807	0.0392188
31314	CHST14	1-11-2-0-0	27	0.0476807	0.0392188
32102	CSK	1-11-2-0-0	27	0.0476807	0.0392188
33084	UBALD1	1-11-2-0-0	27	0.0476807	0.0392188
33604	SPNS1	1-11-2-0-0	27	0.0476807	0.0392188
33714	SEPTIN1	1-11-2-0-0	27	0.0476807	0.0392188
34056	ADGRG1	1-11-2-0-0	27	0.0476807	0.0392188
34900	RFLNB	1-11-2-0-0	27	0.0476807	0.0392188
36960	ERN1	1-11-2-0-0	27	0.0476807	0.0392188
38826	CLPP	1-11-2-0-0	27	0.0476807	0.0392188
41944	MYH7B	1-11-2-0-0	27	0.0476807	0.0392188
42484	MRGBP	1-11-2-0-0	27	0.0476807	0.0392188
43234	DGCR6L	1-11-2-0-0	27	0.0476807	0.0392188
43896	MEI1	1-11-2-0-0	27	0.0476807	0.0392188
1974	DIPK1A	1-2-0-0-0	26	0.0522183	0.0610509
4292	LGALS8	1-2-0-0-0	26	0.0522183	0.0610509
4970	HEATR5B	1-2-0-0-0	26	0.0522183	0.0610509
5592	GCFC2	1-2-0-0-0	26	0.0522183	0.0610509
7344	GIGYF2	1-2-0-0-0	26	0.0522183	0.0610509
7842	NGLY1	1-2-0-0-0	26	0.0522183	0.0610509
10024	ACAP2	1-2-0-0-0	26	0.0522183	0.0610509
10484	ANAPC4	1-2-0-0-0	26	0.0522183	0.0610509
15484	SNX14	1-2-0-0-0	26	0.0522183	0.0610509
15784	CEP85L	1-2-0-0-0	26	0.0522183	0.0610509
15848	RNF146	1-2-0-0-0	26	0.0522183	0.0610509
16586	GLCCI1	1-2-0-0-0	26	0.0522183	0.0610509
19114	SPIDR	1-2-0-0-0	26	0.0522183	0.0610509
19160	LYPLA1	1-2-0-0-0	26	0.0522183	0.0610509
19902	MTSS1	1-2-0-0-0	26	0.0522183	0.0610509
21698	SETX	1-2-0-0-0	26	0.0522183	0.0610509
22350	CCNY	1-2-0-0-0	26	0.0522183	0.0610509
25220	RNF169	1-2-0-0-0	26	0.0522183	0.0610509
27748	EEA1	1-2-0-0-0	26	0.0522183	0.0610509
29136	MYCBP2	1-2-0-0-0	26	0.0522183	0.0610509
29166	AL162493.1	1-2-0-0-0	26	0.0522183	0.0610509
30574	SPTLC2	1-2-0-0-0	26	0.0522183	0.0610509
35996	TAF15	1-2-0-0-0	26	0.0522183	0.0610509
44874	ATRX	1-2-0-0-0	26	0.0522183	0.0610509
45314	ARHGEF6	1-2-0-0-0	26	0.0522183	0.0610509
45372	CD99L2	1-2-0-0-0	26	0.0522183	0.0610509
1340	EIF2B3	1-69-0-0-0	25	0.0472259	0.052768
2538	LINC01138	1-69-0-0-0	25	0.0472259	0.052768
4268	GGPS1	1-69-0-0-0	25	0.0472259	0.052768
4754	RAB10	1-69-0-0-0	25	0.0472259	0.052768
8384	RAD54L2	1-69-0-0-0	25	0.0472259	0.052768
8862	CD96	1-69-0-0-0	25	0.0472259	0.052768
9472	ERICH6-AS1	1-69-0-0-0	25	0.0472259	0.052768
13254	CTNNA1	1-69-0-0-0	25	0.0472259	0.052768
14058	GMDS-DT	1-69-0-0-0	25	0.0472259	0.052768
19528	LRRC69	1-69-0-0-0	25	0.0472259	0.052768
21578	PKN3	1-69-0-0-0	25	0.0472259	0.052768
24106	ZDHHC13	1-69-0-0-0	25	0.0472259	0.052768
26070	AC021054.1	1-69-0-0-0	25	0.0472259	0.052768
26264	C1RL	1-69-0-0-0	25	0.0472259	0.052768
27042	TFCP2	1-69-0-0-0	25	0.0472259	0.052768
27716	POC1B-AS1	1-69-0-0-0	25	0.0472259	0.052768
28442	CCDC92	1-69-0-0-0	25	0.0472259	0.052768
34032	FAM192A	1-69-0-0-0	25	0.0472259	0.052768
37236	TRIM65	1-69-0-0-0	25	0.0472259	0.052768
39164	ZNF700	1-69-0-0-0	25	0.0472259	0.052768
40962	ZNF836	1-69-0-0-0	25	0.0472259	0.052768
41536	C20orf194	1-69-0-0-0	25	0.0472259	0.052768
41952	MMP24OS	1-69-0-0-0	25	0.0472259	0.052768
42084	PLCG1	1-69-0-0-0	25	0.0472259	0.052768
44816	TAF1	1-69-0-0-0	25	0.0472259	0.052768
268	RERE	1-2-1-0-0	25	0.0500621	0.0629519
816	EYA3	1-2-1-0-0	25	0.0500621	0.0629519
3442	CEP350	1-2-1-0-0	25	0.0500621	0.0629519
3614	PTPRC	1-2-1-0-0	25	0.0500621	0.0629519
5078	THADA	1-2-1-0-0	25	0.0500621	0.0629519
5294	EHBP1	1-2-1-0-0	25	0.0500621	0.0629519
6572	MTX2	1-2-1-0-0	25	0.0500621	0.0629519
9698	TNIK	1-2-1-0-0	25	0.0500621	0.0629519
10680	FRYL	1-2-1-0-0	25	0.0500621	0.0629519
11176	PPA2	1-2-1-0-0	25	0.0500621	0.0629519
11518	NR3C2	1-2-1-0-0	25	0.0500621	0.0629519
12614	TBCA	1-2-1-0-0	25	0.0500621	0.0629519
13486	FBXO38	1-2-1-0-0	25	0.0500621	0.0629519
15698	CDK19	1-2-1-0-0	25	0.0500621	0.0629519
17442	ANKIB1	1-2-1-0-0	25	0.0500621	0.0629519
18878	ELP3	1-2-1-0-0	25	0.0500621	0.0629519
21178	SLC44A1	1-2-1-0-0	25	0.0500621	0.0629519
22560	REEP3	1-2-1-0-0	25	0.0500621	0.0629519
24268	TRIM44	1-2-1-0-0	25	0.0500621	0.0629519
26654	INTS13	1-2-1-0-0	25	0.0500621	0.0629519
29746	STRN3	1-2-1-0-0	25	0.0500621	0.0629519
30294	DCAF5	1-2-1-0-0	25	0.0500621	0.0629519
31432	TTBK2	1-2-1-0-0	25	0.0500621	0.0629519
35818	NSRP1	1-2-1-0-0	25	0.0500621	0.0629519
45102	ALG13	1-2-1-0-0	25	0.0500621	0.0629519
420	AL031283.1	1-10-0-0-0	23	0.0485976	0.093735
524	AL031727.2	1-10-0-0-0	23	0.0485976	0.093735
2488	LIX1L-AS1	1-10-0-0-0	23	0.0485976	0.093735
4736	DNAJC27-AS1	1-10-0-0-0	23	0.0485976	0.093735
4852	RBKS	1-10-0-0-0	23	0.0485976	0.093735
4866	PLB1	1-10-0-0-0	23	0.0485976	0.093735
5248	LINC01185	1-10-0-0-0	23	0.0485976	0.093735
9318	AC117382.2	1-10-0-0-0	23	0.0485976	0.093735
14154	CAGE1	1-10-0-0-0	23	0.0485976	0.093735
19016	AC087623.2	1-10-0-0-0	23	0.0485976	0.093735
23284	SFR1	1-10-0-0-0	23	0.0485976	0.093735
27306	IL23A	1-10-0-0-0	23	0.0485976	0.093735
30488	AL691403.1	1-10-0-0-0	23	0.0485976	0.093735
30490	AF111167.1	1-10-0-0-0	23	0.0485976	0.093735
30754	ASB2	1-10-0-0-0	23	0.0485976	0.093735
33350	COQ7	1-10-0-0-0	23	0.0485976	0.093735
34602	AC092718.1	1-10-0-0-0	23	0.0485976	0.093735
36010	AC015849.1	1-10-0-0-0	23	0.0485976	0.093735
36546	MRPL10	1-10-0-0-0	23	0.0485976	0.093735
36840	AC091271.1	1-10-0-0-0	23	0.0485976	0.093735
39076	ILF3-DT	1-10-0-0-0	23	0.0485976	0.093735
43144	LINC00528	1-10-0-0-0	23	0.0485976	0.093735
45352	AC244197.2	1-10-0-0-0	23	0.0485976	0.093735
672	SRRM1	1-30-0-0-0	21	0.0723091	0.105466
5250	REL	1-30-0-0-0	21	0.0723091	0.105466
8232	PRKAR2A	1-30-0-0-0	21	0.0723091	0.105466
12368	GPBP1	1-30-0-0-0	21	0.0723091	0.105466
13068	SLC12A2	1-30-0-0-0	21	0.0723091	0.105466
19026	TACC1	1-30-0-0-0	21	0.0723091	0.105466
19170	LYN	1-30-0-0-0	21	0.0723091	0.105466
20500	B4GALT1	1-30-0-0-0	21	0.0723091	0.105466
20506	BAG1	1-30-0-0-0	21	0.0723091	0.105466
24264	AL133330.1	1-30-0-0-0	21	0.0723091	0.105466
25464	CWC15	1-30-0-0-0	21	0.0723091	0.105466
30858	AL157871.6	1-30-0-0-0	21	0.0723091	0.105466
30894	DYNC1H1	1-30-0-0-0	21	0.0723091	0.105466
33212	GSPT1	1-30-0-0-0	21	0.0723091	0.105466
36278	STAT3	1-30-0-0-0	21	0.0723091	0.105466
36536	KPNB1	1-30-0-0-0	21	0.0723091	0.105466
42442	AL162457.1	1-30-0-0-0	21	0.0723091	0.105466
43630	APOL6	1-30-0-0-0	21	0.0723091	0.105466
44190	P2RY8	1-30-0-0-0	21	0.0723091	0.105466
44314	RBBP7	1-30-0-0-0	21	0.0723091	0.105466
44786	PDZD11	1-30-0-0-0	21	0.0723091	0.105466
1208	SLFNL1-AS1	1-164-0-0-0	21	0.0636301	0.0881612
3056	TAGLN2	1-164-0-0-0	21	0.0636301	0.0881612
4250	IRF2BP2	1-164-0-0-0	21	0.0636301	0.0881612
5106	EPAS1	1-164-0-0-0	21	0.0636301	0.0881612
5132	TTC7A	1-164-0-0-0	21	0.0636301	0.0881612
6818	HSPD1	1-164-0-0-0	21	0.0636301	0.0881612
7560	BHLHE40	1-164-0-0-0	21	0.0636301	0.0881612
18514	ESYT2	1-164-0-0-0	21	0.0636301	0.0881612
19738	AC027031.2	1-164-0-0-0	21	0.0636301	0.0881612
20990	NINJ1	1-164-0-0-0	21	0.0636301	0.0881612
22152	VIM	1-164-0-0-0	21	0.0636301	0.0881612
28334	RHOF	1-164-0-0-0	21	0.0636301	0.0881612
30414	ELMSAN1	1-164-0-0-0	21	0.0636301	0.0881612
33526	IL4R	1-164-0-0-0	21	0.0636301	0.0881612
35658	MAP2K3	1-164-0-0-0	21	0.0636301	0.0881612
36680	RSAD1	1-164-0-0-0	21	0.0636301	0.0881612
37362	USP36	1-164-0-0-0	21	0.0636301	0.0881612
40286	HNRNPUL1	1-164-0-0-0	21	0.0636301	0.0881612
40292	CCDC97	1-164-0-0-0	21	0.0636301	0.0881612
44080	Z98885.3	1-164-0-0-0	21	0.0636301	0.0881612
44092	PIM3	1-164-0-0-0	21	0.0636301	0.0881612
2296	LRIG2	1-39-0-0-0	20	0.0497771	0.0607588
4926	YIPF4	1-39-0-0-0	20	0.0497771	0.0607588
5732	AC092835.1	1-39-0-0-0	20	0.0497771	0.0607588
5940	NCK2	1-39-0-0-0	20	0.0497771	0.0607588
6618	TTN-AS1	1-39-0-0-0	20	0.0497771	0.0607588
11246	ELOVL6	1-39-0-0-0	20	0.0497771	0.0607588
13066	LINC01184	1-39-0-0-0	20	0.0497771	0.0607588
15966	PEX7	1-39-0-0-0	20	0.0497771	0.0607588
16664	SP4	1-39-0-0-0	20	0.0497771	0.0607588
17164	ZNF117	1-39-0-0-0	20	0.0497771	0.0607588
19268	MYBL1	1-39-0-0-0	20	0.0497771	0.0607588
25186	MRPL48	1-39-0-0-0	20	0.0497771	0.0607588
26330	KLRG1	1-39-0-0-0	20	0.0497771	0.0607588
26516	ATF7IP	1-39-0-0-0	20	0.0497771	0.0607588
30636	LINC01146	1-39-0-0-0	20	0.0497771	0.0607588
30710	CATSPERB	1-39-0-0-0	20	0.0497771	0.0607588
31798	ICE2	1-39-0-0-0	20	0.0497771	0.0607588
45092	ACSL4	1-39-0-0-0	20	0.0497771	0.0607588
45486	BRCC3	1-39-0-0-0	20	0.0497771	0.0607588
45502	TMLHE	1-39-0-0-0	20	0.0497771	0.0607588
1984	CCDC18-AS1	1-89-0-0-0	19	0.0536505	0.0434072
2230	AL355816.2	1-89-0-0-0	19	0.0536505	0.0434072
6324	NEB	1-89-0-0-0	19	0.0536505	0.0434072
8816	AC131237.1	1-89-0-0-0	19	0.0536505	0.0434072
9512	AC078788.1	1-89-0-0-0	19	0.0536505	0.0434072
16648	HDAC9	1-89-0-0-0	19	0.0536505	0.0434072
16794	CHN2	1-89-0-0-0	19	0.0536505	0.0434072
17200	TYW1	1-89-0-0-0	19	0.0536505	0.0434072
19548	RBM12B	1-89-0-0-0	19	0.0536505	0.0434072
21380	MRRF	1-89-0-0-0	19	0.0536505	0.0434072
25870	UBASH3B	1-89-0-0-0	19	0.0536505	0.0434072
26336	A2M-AS1	1-89-0-0-0	19	0.0536505	0.0434072
29358	CARS2	1-89-0-0-0	19	0.0536505	0.0434072
31100	OCA2	1-89-0-0-0	19	0.0536505	0.0434072
31170	GOLGA8N	1-89-0-0-0	19	0.0536505	0.0434072
33834	AC026471.1	1-89-0-0-0	19	0.0536505	0.0434072
35428	HS3ST3B1	1-89-0-0-0	19	0.0536505	0.0434072
40486	NKPD1	1-89-0-0-0	19	0.0536505	0.0434072
40916	AC008750.7	1-89-0-0-0	19	0.0536505	0.0434072
662	NIPAL3	1-25-0-0-0	19	0.043232	0.0588272
1098	SF3A3	1-25-0-0-0	19	0.043232	0.0588272
1554	CYB5RL	1-25-0-0-0	19	0.043232	0.0588272
5838	AC079447.1	1-25-0-0-0	19	0.043232	0.0588272
5882	MAP4K4	1-25-0-0-0	19	0.043232	0.0588272
6506	METTL8	1-25-0-0-0	19	0.043232	0.0588272
22068	NUDT5	1-25-0-0-0	19	0.043232	0.0588272
25360	CREBZF	1-25-0-0-0	19	0.043232	0.0588272
26406	KLRK1	1-25-0-0-0	19	0.043232	0.0588272
28764	N4BP2L2	1-25-0-0-0	19	0.043232	0.0588272
29224	RAP2A	1-25-0-0-0	19	0.043232	0.0588272
31226	DPH6	1-25-0-0-0	19	0.043232	0.0588272
32768	LMF1	1-25-0-0-0	19	0.043232	0.0588272
33364	VPS35L	1-25-0-0-0	19	0.043232	0.0588272
35466	PIGL	1-25-0-0-0	19	0.043232	0.0588272
35978	SLFN12L	1-25-0-0-0	19	0.043232	0.0588272
37652	METTL4	1-25-0-0-0	19	0.043232	0.0588272
43830	Z82206.1	1-25-0-0-0	19	0.043232	0.0588272
44736	ARHGEF9	1-25-0-0-0	19	0.043232	0.0588272
306	CLSTN1	1-273-0-0-0	18	0.0394365	0.0661537
1112	AL139260.1	1-273-0-0-0	18	0.0394365	0.0661537
3014	AL356276.1	1-273-0-0-0	18	0.0394365	0.0661537
4484	TRAPPC12	1-273-0-0-0	18	0.0394365	0.0661537
4516	RNF144A	1-273-0-0-0	18	0.0394365	0.0661537
6008	ANAPC1	1-273-0-0-0	18	0.0394365	0.0661537
10330	TBC1D14	1-273-0-0-0	18	0.0394365	0.0661537
11370	JADE1	1-273-0-0-0	18	0.0394365	0.0661537
14932	DEF6	1-273-0-0-0	18	0.0394365	0.0661537
15066	TFEB	1-273-0-0-0	18	0.0394365	0.0661537
16940	AC006033.2	1-273-0-0-0	18	0.0394365	0.0661537
18578	MFHAS1	1-273-0-0-0	18	0.0394365	0.0661537
26756	AC026356.2	1-273-0-0-0	18	0.0394365	0.0661537
28912	TPT1-AS1	1-273-0-0-0	18	0.0394365	0.0661537
29780	SNX6	1-273-0-0-0	18	0.0394365	0.0661537
32656	TARSL2	1-273-0-0-0	18	0.0394365	0.0661537
34654	TAF1C	1-273-0-0-0	18	0.0394365	0.0661537
43400	KIAA1671	1-273-0-0-0	18	0.0394365	0.0661537
274	ENO1	1-95-0-0-0	16	0.0352219	0.071623
13904	TMED9	1-95-0-0-0	16	0.0352219	0.071623
13924	NHP2	1-95-0-0-0	16	0.0352219	0.071623
14690	NCR3	1-95-0-0-0	16	0.0352219	0.071623
14874	CUTA	1-95-0-0-0	16	0.0352219	0.071623
17142	CHCHD2	1-95-0-0-0	16	0.0352219	0.071623
21854	PAXX	1-95-0-0-0	16	0.0352219	0.071623
23150	NDUFB8	1-95-0-0-0	16	0.0352219	0.071623
28074	ARPC3	1-95-0-0-0	16	0.0352219	0.071623
31862	PPIB	1-95-0-0-0	16	0.0352219	0.071623
32848	NDUFB10	1-95-0-0-0	16	0.0352219	0.071623
35192	RNASEK	1-95-0-0-0	16	0.0352219	0.071623
37178	SUMO2	1-95-0-0-0	16	0.0352219	0.071623
40136	EIF3K	1-95-0-0-0	16	0.0352219	0.071623
43358	MIF	1-95-0-0-0	16	0.0352219	0.071623
45144	SLC25A5	1-95-0-0-0	16	0.0352219	0.071623
176	WRAP73	1-61-0-0-0	16	0.0439813	0.0566624
3774	NUCKS1	1-61-0-0-0	16	0.0439813	0.0566624
6094	C2orf76	1-61-0-0-0	16	0.0439813	0.0566624
6300	KIF5C	1-61-0-0-0	16	0.0439813	0.0566624
10200	CTBP1-DT	1-61-0-0-0	16	0.0439813	0.0566624
10492	SMIM20	1-61-0-0-0	16	0.0439813	0.0566624
12436	NLN	1-61-0-0-0	16	0.0439813	0.0566624
17516	TECPR1	1-61-0-0-0	16	0.0439813	0.0566624
18648	FDFT1	1-61-0-0-0	16	0.0439813	0.0566624
21596	PHYHD1	1-61-0-0-0	16	0.0439813	0.0566624
24708	PLAAT3	1-61-0-0-0	16	0.0439813	0.0566624
25074	CPT1A	1-61-0-0-0	16	0.0439813	0.0566624
34506	TERF2IP	1-61-0-0-0	16	0.0439813	0.0566624
36684	MYCBPAP	1-61-0-0-0	16	0.0439813	0.0566624
40540	SYMPK	1-61-0-0-0	16	0.0439813	0.0566624
42224	ELMO2	1-61-0-0-0	16	0.0439813	0.0566624
3012	FCRL3	1-37-0-0-0	15	0.0378418	0.0513904
16326	Z94721.1	1-37-0-0-0	15	0.0378418	0.0513904
20008	ST3GAL1	1-37-0-0-0	15	0.0378418	0.0513904
23306	XPNPEP1	1-37-0-0-0	15	0.0378418	0.0513904
23942	TMEM9B-AS1	1-37-0-0-0	15	0.0378418	0.0513904
27214	TESPA1	1-37-0-0-0	15	0.0378418	0.0513904
27358	R3HDM2	1-37-0-0-0	15	0.0378418	0.0513904
28620	LINC00539	1-37-0-0-0	15	0.0378418	0.0513904
31310	BAHD1	1-37-0-0-0	15	0.0378418	0.0513904
31868	TRIP4	1-37-0-0-0	15	0.0378418	0.0513904
31932	DIS3L	1-37-0-0-0	15	0.0378418	0.0513904
35440	CDRT4	1-37-0-0-0	15	0.0378418	0.0513904
41820	BCL2L1	1-37-0-0-0	15	0.0378418	0.0513904
42022	RBL1	1-37-0-0-0	15	0.0378418	0.0513904
42808	GART	1-37-0-0-0	15	0.0378418	0.0513904
10180	DGKQ	1-11-3-0-0	15	0.0971138	0.199692
10576	RPL9	1-11-3-0-0	15	0.0971138	0.199692
11532	RPS3A	1-11-3-0-0	15	0.0971138	0.199692
12684	RPS23	1-11-3-0-0	15	0.0971138	0.199692
14938	RPL10A	1-11-3-0-0	15	0.0971138	0.199692
15906	RPS12	1-11-3-0-0	15	0.0971138	0.199692
21428	RPL35	1-11-3-0-0	15	0.0971138	0.199692
22808	RPS24	1-11-3-0-0	15	0.0971138	0.199692
35218	CTDNEP1	1-11-3-0-0	15	0.0971138	0.199692
38116	RPL17	1-11-3-0-0	15	0.0971138	0.199692
39598	UBA52	1-11-3-0-0	15	0.0971138	0.199692
40320	RPS19	1-11-3-0-0	15	0.0971138	0.199692
40736	FTL	1-11-3-0-0	15	0.0971138	0.199692
40772	RPL13A	1-11-3-0-0	15	0.0971138	0.199692
41180	RPL28	1-11-3-0-0	15	0.0971138	0.199692
14780	AGPAT1	1-97-0-0-0	14	0.0835256	0.0660222
14782	RNF5	1-97-0-0-0	14	0.0835256	0.0660222
17600	LAMTOR4	1-97-0-0-0	14	0.0835256	0.0660222
20202	VPS28	1-97-0-0-0	14	0.0835256	0.0660222
21906	MRPL41	1-97-0-0-0	14	0.0835256	0.0660222
27278	MYL6	1-97-0-0-0	14	0.0835256	0.0660222
32988	IL32	1-97-0-0-0	14	0.0835256	0.0660222
35102	PFN1	1-97-0-0-0	14	0.0835256	0.0660222
38586	TIMM13	1-97-0-0-0	14	0.0835256	0.0660222
39644	NDUFA13	1-97-0-0-0	14	0.0835256	0.0660222
39978	HCST	1-97-0-0-0	14	0.0835256	0.0660222
40004	TBCB	1-97-0-0-0	14	0.0835256	0.0660222
40570	CALM3	1-97-0-0-0	14	0.0835256	0.0660222
41420	CHMP2A	1-97-0-0-0	14	0.0835256	0.0660222
996	SMIM12	1-11-1-0-0	14	0.0272894	0.0448956
2162	CYB561D1	1-11-1-0-0	14	0.0272894	0.0448956
7318	NMUR1	1-11-1-0-0	14	0.0272894	0.0448956
14070	SERPINB9	1-11-1-0-0	14	0.0272894	0.0448956
23098	HPS1	1-11-1-0-0	14	0.0272894	0.0448956
23712	TMEM80	1-11-1-0-0	14	0.0272894	0.0448956
24776	RASGRP2	1-11-1-0-0	14	0.0272894	0.0448956
34124	TK2	1-11-1-0-0	14	0.0272894	0.0448956
38844	TUBB4A	1-11-1-0-0	14	0.0272894	0.0448956
40892	SIGLEC7	1-11-1-0-0	14	0.0272894	0.0448956
41132	NCR1	1-11-1-0-0	14	0.0272894	0.0448956
42038	AL109614.1	1-11-1-0-0	14	0.0272894	0.0448956
43210	COMT	1-11-1-0-0	14	0.0272894	0.0448956
43590	YWHAH	1-11-1-0-0	14	0.0272894	0.0448956
7904	CRTAP	1-45-2-0-0	13	0.0288849	0
14028	AC138035.1	1-45-2-0-0	13	0.0288849	0
18560	AC016065.1	1-45-2-0-0	13	0.0288849	0
19210	AC068389.1	1-45-2-0-0	13	0.0288849	0
24694	SLC3A2	1-45-2-0-0	13	0.0288849	0
24714	RTN3	1-45-2-0-0	13	0.0288849	0
25038	NDUFV1	1-45-2-0-0	13	0.0288849	0
38462	CNN2	1-45-2-0-0	13	0.0288849	0
38764	PLIN3	1-45-2-0-0	13	0.0288849	0
39544	CCDC124	1-45-2-0-0	13	0.0288849	0
42074	AL132981.1	1-45-2-0-0	13	0.0288849	0
43812	SYNGR1	1-45-2-0-0	13	0.0288849	0
43956	BIK	1-45-2-0-0	13	0.0288849	0
1794	AC118549.1	1-28-1-0-0	13	0.0481072	0.0588362
2226	CEPT1	1-28-1-0-0	13	0.0481072	0.0588362
3610	NEK7	1-28-1-0-0	13	0.0481072	0.0588362
4668	PUM2	1-28-1-0-0	13	0.0481072	0.0588362
7272	TRIP12	1-28-1-0-0	13	0.0481072	0.0588362
9616	NMD3	1-28-1-0-0	13	0.0481072	0.0588362
16580	UMAD1	1-28-1-0-0	13	0.0481072	0.0588362
27020	LARP4	1-28-1-0-0	13	0.0481072	0.0588362
28564	ZNF26	1-28-1-0-0	13	0.0481072	0.0588362
31594	ATP8B4	1-28-1-0-0	13	0.0481072	0.0588362
33426	MOSMO	1-28-1-0-0	13	0.0481072	0.0588362
40076	ZNF527	1-28-1-0-0	13	0.0481072	0.0588362
44522	ZNF41	1-28-1-0-0	13	0.0481072	0.0588362
2472	RNF115	1-14-7-0-0	13	0.0511784	0.116573
4406	AHCTF1	1-14-7-0-0	13	0.0511784	0.116573
6766	STAT4	1-14-7-0-0	13	0.0511784	0.116573
7912	CLASP2	1-14-7-0-0	13	0.0511784	0.116573
10628	ATP8A1	1-14-7-0-0	13	0.0511784	0.116573
11652	MSMO1	1-14-7-0-0	13	0.0511784	0.116573
15728	FYN	1-14-7-0-0	13	0.0511784	0.116573
19854	DERL1	1-14-7-0-0	13	0.0511784	0.116573
22860	CCSER2	1-14-7-0-0	13	0.0511784	0.116573
25746	MPZL3	1-14-7-0-0	13	0.0511784	0.116573
38006	ELP2	1-14-7-0-0	13	0.0511784	0.116573
42260	ARFGEF2	1-14-7-0-0	13	0.0511784	0.116573
45196	STAG2	1-14-7-0-0	13	0.0511784	0.116573
108	SLC35E2B	1-13-3-0-0	13	0.0395626	0.0581448
2784	DENND4B	1-13-3-0-0	13	0.0395626	0.0581448
8350	RASSF1	1-13-3-0-0	13	0.0395626	0.0581448
10060	TM4SF19	1-13-3-0-0	13	0.0395626	0.0581448
21840	TRAF2	1-13-3-0-0	13	0.0395626	0.0581448
24376	ARHGAP1	1-13-3-0-0	13	0.0395626	0.0581448
25014	TBC1D10C	1-13-3-0-0	13	0.0395626	0.0581448
28078	FAM216A	1-13-3-0-0	13	0.0395626	0.0581448
30498	BATF	1-13-3-0-0	13	0.0395626	0.0581448
31010	PACS2	1-13-3-0-0	13	0.0395626	0.0581448
37206	LLGL2	1-13-3-0-0	13	0.0395626	0.0581448
37444	SLC38A10	1-13-3-0-0	13	0.0395626	0.0581448
41976	NFS1	1-13-3-0-0	13	0.0395626	0.0581448
13220	HNRNPA0	1-11-0-1-0	13	0.0605308	0.0733989
15514	PNRC1	1-11-0-1-0	13	0.0605308	0.0733989
20122	EEF1D	1-11-0-1-0	13	0.0605308	0.0733989
25818	H2AFX	1-11-0-1-0	13	0.0605308	0.0733989
28254	RPLP0	1-11-0-1-0	13	0.0605308	0.0733989
31944	RPL4	1-11-0-1-0	13	0.0605308	0.0733989
34134	CMTM3	1-11-0-1-0	13	0.0605308	0.0733989
36382	G6PC3	1-11-0-1-0	13	0.0605308	0.0733989
37488	P4HB	1-11-0-1-0	13	0.0605308	0.0733989
38420	BSG	1-11-0-1-0	13	0.0605308	0.0733989
38626	TLE5	1-11-0-1-0	13	0.0605308	0.0733989
43026	CFAP410	1-11-0-1-0	13	0.0605308	0.0733989
43384	GUCD1	1-11-0-1-0	13	0.0605308	0.0733989
10766	HOPX	1-11-0-0-1	13	0.0293557	0.0912522
13842	HIGD2A	1-11-0-0-1	13	0.0293557	0.0912522
13874	PRELID1	1-11-0-0-1	13	0.0293557	0.0912522
14896	SMIM29	1-11-0-0-1	13	0.0293557	0.0912522
21972	AKR1C3	1-11-0-0-1	13	0.0293557	0.0912522
28398	ARL6IP4	1-11-0-0-1	13	0.0293557	0.0912522
29116	COMMD6	1-11-0-0-1	13	0.0293557	0.0912522
34254	PSMB10	1-11-0-0-1	13	0.0293557	0.0912522
37502	ANAPC11	1-11-0-0-1	13	0.0293557	0.0912522
38520	UQCR11	1-11-0-0-1	13	0.0293557	0.0912522
38800	NDUFA11	1-11-0-0-1	13	0.0293557	0.0912522
39602	REX1BD	1-11-0-0-1	13	0.0293557	0.0912522
43368	DDT	1-11-0-0-1	13	0.0293557	0.0912522
780	WASF2	1-1-5-0-0	13	0.0351465	0.054283
11058	SMARCAD1	1-1-5-0-0	13	0.0351465	0.054283
11946	SRD5A1	1-1-5-0-0	13	0.0351465	0.054283
15686	FIG4	1-1-5-0-0	13	0.0351465	0.054283
19476	RMDN1	1-1-5-0-0	13	0.0351465	0.054283
24280	TRAF6	1-1-5-0-0	13	0.0351465	0.054283
25448	MRE11	1-1-5-0-0	13	0.0351465	0.054283
28692	MTIF3	1-1-5-0-0	13	0.0351465	0.054283
28984	SETDB2	1-1-5-0-0	13	0.0351465	0.054283
30326	SYNJ2BP	1-1-5-0-0	13	0.0351465	0.054283
37886	TTC39C	1-1-5-0-0	13	0.0351465	0.054283
42570	PCMTD2	1-1-5-0-0	13	0.0351465	0.054283
43204	GNB1L	1-1-5-0-0	13	0.0351465	0.054283
572	USP48	1-1-1-0-0	13	0.0429843	0.0496559
2198	RBM15	1-1-1-0-0	13	0.0429843	0.0496559
4922	SLC30A6	1-1-1-0-0	13	0.0429843	0.0496559
7900	GLB1	1-1-1-0-0	13	0.0429843	0.0496559
12424	CENPK	1-1-1-0-0	13	0.0429843	0.0496559
13866	NSD1	1-1-1-0-0	13	0.0429843	0.0496559
15582	USP45	1-1-1-0-0	13	0.0429843	0.0496559
19588	PLEKHF2	1-1-1-0-0	13	0.0429843	0.0496559
21054	HABP4	1-1-1-0-0	13	0.0429843	0.0496559
22578	HERC4	1-1-1-0-0	13	0.0429843	0.0496559
22992	FRA10AC1	1-1-1-0-0	13	0.0429843	0.0496559
24256	PDHX	1-1-1-0-0	13	0.0429843	0.0496559
30060	TMEM260	1-1-1-0-0	13	0.0429843	0.0496559
2014	ALG14	1-65-1-0-0	12	0.0497038	0.0397599
2444	HIST2H3PS2	1-65-1-0-0	12	0.0497038	0.0397599
7670	ATG7	1-65-1-0-0	12	0.0497038	0.0397599
8932	CCDC191	1-65-1-0-0	12	0.0497038	0.0397599
10734	TMEM165	1-65-1-0-0	12	0.0497038	0.0397599
15460	UBE3D	1-65-1-0-0	12	0.0497038	0.0397599
18294	EPHA1-AS1	1-65-1-0-0	12	0.0497038	0.0397599
29980	GPR137C	1-65-1-0-0	12	0.0497038	0.0397599
31424	STARD9	1-65-1-0-0	12	0.0497038	0.0397599
38188	AC027097.1	1-65-1-0-0	12	0.0497038	0.0397599
38334	ZNF236	1-65-1-0-0	12	0.0497038	0.0397599
44928	DIAPH2	1-65-1-0-0	12	0.0497038	0.0397599
4126	GJC2	1-27-0-1-0	12	0.0559902	0.0431268
4586	ODC1	1-27-0-1-0	12	0.0559902	0.0431268
8198	ZNF589	1-27-0-1-0	12	0.0559902	0.0431268
15108	BICRAL	1-27-0-1-0	12	0.0559902	0.0431268
16730	HNRNPA2B1	1-27-0-1-0	12	0.0559902	0.0431268
17030	YKT6	1-27-0-1-0	12	0.0559902	0.0431268
18574	FAM85B	1-27-0-1-0	12	0.0559902	0.0431268
26916	AC024257.3	1-27-0-1-0	12	0.0559902	0.0431268
27342	NEMP1	1-27-0-1-0	12	0.0559902	0.0431268
28848	MTRF1	1-27-0-1-0	12	0.0559902	0.0431268
33472	DCTN5	1-27-0-1-0	12	0.0559902	0.0431268
40974	ZNF480	1-27-0-1-0	12	0.0559902	0.0431268
262	ERRFI1	1-170-0-0-0	12	0.0902918	0.1179
2388	TENT5C	1-170-0-0-0	12	0.0902918	0.1179
4574	KLF11	1-170-0-0-0	12	0.0902918	0.1179
7370	ARL4C	1-170-0-0-0	12	0.0902918	0.1179
9280	CDV3	1-170-0-0-0	12	0.0902918	0.1179
15566	NDUFAF4	1-170-0-0-0	12	0.0902918	0.1179
16236	DYNLT1	1-170-0-0-0	12	0.0902918	0.1179
23330	BBIP1	1-170-0-0-0	12	0.0902918	0.1179
26842	SLC38A1	1-170-0-0-0	12	0.0902918	0.1179
33918	TENT4B	1-170-0-0-0	12	0.0902918	0.1179
35644	USP22	1-170-0-0-0	12	0.0902918	0.1179
42520	GMEB2	1-170-0-0-0	12	0.0902918	0.1179
1316	ERI3	1-149-0-0-0	12	0.0545493	0.075828
5188	ACYP2	1-149-0-0-0	12	0.0545493	0.075828
9168	EEFSEC	1-149-0-0-0	12	0.0545493	0.075828
13004	TNFAIP8	1-149-0-0-0	12	0.0545493	0.075828
21120	TGFBR1	1-149-0-0-0	12	0.0545493	0.075828
22870	BMPR1A	1-149-0-0-0	12	0.0545493	0.075828
28198	FBXW8	1-149-0-0-0	12	0.0545493	0.075828
36866	USP32	1-149-0-0-0	12	0.0545493	0.075828
38156	RAB27B	1-149-0-0-0	12	0.0545493	0.075828
44730	LINC01278	1-149-0-0-0	12	0.0545493	0.075828
44838	HDAC8	1-149-0-0-0	12	0.0545493	0.075828
45138	SLC25A43	1-149-0-0-0	12	0.0545493	0.075828
1738	ANKRD13C	1-14-0-1-0	12	0.04195	0.076342
2106	VAV3	1-14-0-1-0	12	0.04195	0.076342
2324	TRIM33	1-14-0-1-0	12	0.04195	0.076342
4930	BIRC6	1-14-0-1-0	12	0.04195	0.076342
13590	G3BP1	1-14-0-1-0	12	0.04195	0.076342
20016	ZFAT	1-14-0-1-0	12	0.04195	0.076342
20822	VPS13A	1-14-0-1-0	12	0.04195	0.076342
22686	MCU	1-14-0-1-0	12	0.04195	0.076342
24244	CAPRIN1	1-14-0-1-0	12	0.04195	0.076342
30898	WDR20	1-14-0-1-0	12	0.04195	0.076342
31802	RORA	1-14-0-1-0	12	0.04195	0.076342
42056	RALGAPB	1-14-0-1-0	12	0.04195	0.076342
4224	DISC1	1-69-0-1-0	11	0.0346455	0.0619137
14110	ECI2	1-69-0-1-0	11	0.0346455	0.0619137
21238	AL138756.1	1-69-0-1-0	11	0.0346455	0.0619137
24440	FNBP4	1-69-0-1-0	11	0.0346455	0.0619137
24992	KDM2A	1-69-0-1-0	11	0.0346455	0.0619137
26112	ITFG2	1-69-0-1-0	11	0.0346455	0.0619137
36512	GOSR2	1-69-0-1-0	11	0.0346455	0.0619137
36718	AC006141.1	1-69-0-1-0	11	0.0346455	0.0619137
41032	ZNF525	1-69-0-1-0	11	0.0346455	0.0619137
44702	RRAGB	1-69-0-1-0	11	0.0346455	0.0619137
44794	TEX11	1-69-0-1-0	11	0.0346455	0.0619137
1440	FAF1	1-6-0-0-0	11	0.0436022	0.0669374
1490	TUT4	1-6-0-0-0	11	0.0436022	0.0669374
8188	SMARCC1	1-6-0-0-0	11	0.0436022	0.0669374
11330	KIAA1109	1-6-0-0-0	11	0.0436022	0.0669374
25068	PPP6R3	1-6-0-0-0	11	0.0436022	0.0669374
25552	AP000766.1	1-6-0-0-0	11	0.0436022	0.0669374
27660	PPP1R12A	1-6-0-0-0	11	0.0436022	0.0669374
28594	ZMYM2	1-6-0-0-0	11	0.0436022	0.0669374
31816	VPS13C	1-6-0-0-0	11	0.0436022	0.0669374
36766	MSI2	1-6-0-0-0	11	0.0436022	0.0669374
42844	RUNX1	1-6-0-0-0	11	0.0436022	0.0669374
938	HDAC1	1-45-3-0-0	11	0.0235016	0
2580	HIST2H2AB	1-45-3-0-0	11	0.0235016	0
7888	CMTM7	1-45-3-0-0	11	0.0235016	0
10286	MSX1	1-45-3-0-0	11	0.0235016	0
13282	ECSCR	1-45-3-0-0	11	0.0235016	0
27280	SMARCC2	1-45-3-0-0	11	0.0235016	0
35074	ARRB2	1-45-3-0-0	11	0.0235016	0
37562	CYBC1	1-45-3-0-0	11	0.0235016	0
38640	NFIC	1-45-3-0-0	11	0.0235016	0
40842	MYH14	1-45-3-0-0	11	0.0235016	0
44052	GRAMD4	1-45-3-0-0	11	0.0235016	0
939	HDAC1_flip	1-44-3-0-0	11	0.0235016	0
2581	HIST2H2AB_flip	1-44-3-0-0	11	0.0235016	0
7889	CMTM7_flip	1-44-3-0-0	11	0.0235016	0
10287	MSX1_flip	1-44-3-0-0	11	0.0235016	0
13283	ECSCR_flip	1-44-3-0-0	11	0.0235016	0
27281	SMARCC2_flip	1-44-3-0-0	11	0.0235016	0
35075	ARRB2_flip	1-44-3-0-0	11	0.0235016	0
37563	CYBC1_flip	1-44-3-0-0	11	0.0235016	0
38641	NFIC_flip	1-44-3-0-0	11	0.0235016	0
40843	MYH14_flip	1-44-3-0-0	11	0.0235016	0
44053	GRAMD4_flip	1-44-3-0-0	11	0.0235016	0
1028	AGO4	1-39-1-0-0	11	0.0336882	0.0463088
3696	KLHL12	1-39-1-0-0	11	0.0336882	0.0463088
22428	WASHC2C	1-39-1-0-0	11	0.0336882	0.0463088
24308	HSD17B12	1-39-1-0-0	11	0.0336882	0.0463088
25658	TTC12	1-39-1-0-0	11	0.0336882	0.0463088
26526	AC010168.2	1-39-1-0-0	11	0.0336882	0.0463088
28822	AL354809.1	1-39-1-0-0	11	0.0336882	0.0463088
30308	SLC39A9	1-39-1-0-0	11	0.0336882	0.0463088
30712	AL121839.2	1-39-1-0-0	11	0.0336882	0.0463088
35642	CCDC144NL-AS1	1-39-1-0-0	11	0.0336882	0.0463088
35948	RFFL	1-39-1-0-0	11	0.0336882	0.0463088
342	TARDBP	1-234-0-0-0	11	0.0207254	0.0221897
10038	LINC01983	1-234-0-0-0	11	0.0207254	0.0221897
17138	SUMF2	1-234-0-0-0	11	0.0207254	0.0221897
22016	LINC02656	1-234-0-0-0	11	0.0207254	0.0221897
22430	AGAP4	1-234-0-0-0	11	0.0207254	0.0221897
28530	PUS1	1-234-0-0-0	11	0.0207254	0.0221897
33838	TGFB1I1	1-234-0-0-0	11	0.0207254	0.0221897
35720	AC005726.5	1-234-0-0-0	11	0.0207254	0.0221897
39062	KEAP1	1-234-0-0-0	11	0.0207254	0.0221897
40270	RAB4B	1-234-0-0-0	11	0.0207254	0.0221897
40500	CD3EAP	1-234-0-0-0	11	0.0207254	0.0221897
10826	ADAMTS3	1-2-7-0-0	11	0.0513685	0.0458946
17860	IMMP2L	1-2-7-0-0	11	0.0513685	0.0458946
18096	CHCHD3	1-2-7-0-0	11	0.0513685	0.0458946
18624	AF131215.4	1-2-7-0-0	11	0.0513685	0.0458946
20374	ZDHHC21	1-2-7-0-0	11	0.0513685	0.0458946
22308	ZEB1	1-2-7-0-0	11	0.0513685	0.0458946
23368	DCLRE1A	1-2-7-0-0	11	0.0513685	0.0458946
28788	NBEA	1-2-7-0-0	11	0.0513685	0.0458946
30552	CIPC	1-2-7-0-0	11	0.0513685	0.0458946
30806	VRK1	1-2-7-0-0	11	0.0513685	0.0458946
31728	ZNF280D	1-2-7-0-0	11	0.0513685	0.0458946
1206	CTPS1	1-164-2-0-0	11	0.103627	0.0938684
1210	SLFNL1	1-164-2-0-0	11	0.103627	0.0938684
10044	TNK2-AS1	1-164-2-0-0	11	0.103627	0.0938684
17674	ACHE	1-164-2-0-0	11	0.103627	0.0938684
25180	AP000763.3	1-164-2-0-0	11	0.103627	0.0938684
30224	AL139022.1	1-164-2-0-0	11	0.103627	0.0938684
34744	SLC7A5	1-164-2-0-0	11	0.103627	0.0938684
37568	NARF	1-164-2-0-0	11	0.103627	0.0938684
40258	NUMBL	1-164-2-0-0	11	0.103627	0.0938684
40288	TGFB1	1-164-2-0-0	11	0.103627	0.0938684
40456	BCL3	1-164-2-0-0	11	0.103627	0.0938684
12232	AC025171.1	1-147-0-0-0	11	0.0362396	0.0587163
12234	AC025171.3	1-147-0-0-0	11	0.0362396	0.0587163
16266	SOD2-OT1	1-147-0-0-0	11	0.0362396	0.0587163
19018	LETM2	1-147-0-0-0	11	0.0362396	0.0587163
29762	AL163973.2	1-147-0-0-0	11	0.0362396	0.0587163
29902	AL627171.1	1-147-0-0-0	11	0.0362396	0.0587163
30888	AL137779.2	1-147-0-0-0	11	0.0362396	0.0587163
41466	SDCBP2	1-147-0-0-0	11	0.0362396	0.0587163
43566	PIK3IP1-AS1	1-147-0-0-0	11	0.0362396	0.0587163
44800	CXorf65	1-147-0-0-0	11	0.0362396	0.0587163
44962	HNRNPH2	1-147-0-0-0	11	0.0362396	0.0587163
10168	PCGF3	1-13-7-0-0	11	0.034031	0.0302543
23720	AP006621.3	1-13-7-0-0	11	0.034031	0.0302543
23900	MRPL17	1-13-7-0-0	11	0.034031	0.0302543
23936	AKIP1	1-13-7-0-0	11	0.034031	0.0302543
24398	DDB2	1-13-7-0-0	11	0.034031	0.0302543
25406	CTSC	1-13-7-0-0	11	0.034031	0.0302543
27250	RAB5B	1-13-7-0-0	11	0.034031	0.0302543
33074	NMRAL1	1-13-7-0-0	11	0.034031	0.0302543
34128	CKLF	1-13-7-0-0	11	0.034031	0.0302543
40784	PRR12	1-13-7-0-0	11	0.034031	0.0302543
43244	MED15	1-13-7-0-0	11	0.034031	0.0302543
4118	ARF1	1-11-0-2-0	11	0.0349984	0.106556
6030	CHCHD5	1-11-0-2-0	11	0.0349984	0.106556
23682	RNH1	1-11-0-2-0	11	0.0349984	0.106556
24902	CCDC85B	1-11-0-2-0	11	0.0349984	0.106556
25012	PPP1CA	1-11-0-2-0	11	0.0349984	0.106556
27324	ATP5F1B	1-11-0-2-0	11	0.0349984	0.106556
34446	PSMD7	1-11-0-2-0	11	0.0349984	0.106556
35310	VAMP2	1-11-0-2-0	11	0.0349984	0.106556
37500	ALYREF	1-11-0-2-0	11	0.0349984	0.106556
38564	PLEKHJ1	1-11-0-2-0	11	0.0349984	0.106556
42536	LIME1	1-11-0-2-0	11	0.0349984	0.106556
384	CLCN6	1-102-0-0-0	11	0.0409297	0.0321491
1370	GPBP1L1	1-102-0-0-0	11	0.0409297	0.0321491
2552	AC245297.3	1-102-0-0-0	11	0.0409297	0.0321491
4364	CATSPERE	1-102-0-0-0	11	0.0409297	0.0321491
8924	ATP6V1A	1-102-0-0-0	11	0.0409297	0.0321491
10328	KIAA0232	1-102-0-0-0	11	0.0409297	0.0321491
22604	KIF1BP	1-102-0-0-0	11	0.0409297	0.0321491
25222	XRRA1	1-102-0-0-0	11	0.0409297	0.0321491
28106	BRAP	1-102-0-0-0	11	0.0409297	0.0321491
36870	APPBP2	1-102-0-0-0	11	0.0409297	0.0321491
40424	ZNF224	1-102-0-0-0	11	0.0409297	0.0321491
1488	PRPF38A	1-89-3-0-0	10	0.0406053	0.0411235
4360	AL645465.1	1-89-3-0-0	10	0.0406053	0.0411235
4786	AGBL5	1-89-3-0-0	10	0.0406053	0.0411235
10956	SCD5	1-89-3-0-0	10	0.0406053	0.0411235
11268	ZGRF1	1-89-3-0-0	10	0.0406053	0.0411235
17326	CCDC146	1-89-3-0-0	10	0.0406053	0.0411235
19606	CPQ	1-89-3-0-0	10	0.0406053	0.0411235
22094	AL157392.3	1-89-3-0-0	10	0.0406053	0.0411235
36298	RETREG3	1-89-3-0-0	10	0.0406053	0.0411235
44212	ARSD	1-89-3-0-0	10	0.0406053	0.0411235
1030	AGO1	1-65-1-1-0	10	0.0466274	0.0363429
7956	DLEC1	1-65-1-1-0	10	0.0466274	0.0363429
8844	DZIP3	1-65-1-1-0	10	0.0466274	0.0363429
11458	USP38	1-65-1-1-0	10	0.0466274	0.0363429
12440	ERBIN	1-65-1-1-0	10	0.0466274	0.0363429
15394	SLC17A5	1-65-1-1-0	10	0.0466274	0.0363429
20526	UBE2R2	1-65-1-1-0	10	0.0466274	0.0363429
23010	CYP2C8	1-65-1-1-0	10	0.0466274	0.0363429
23198	ARMH3	1-65-1-1-0	10	0.0466274	0.0363429
23984	RNF141	1-65-1-1-0	10	0.0466274	0.0363429
8084	TCAIM	1-65-0-0-1	10	0.0505347	0.0732237
12130	SPEF2	1-65-0-0-1	10	0.0505347	0.0732237
13986	CNOT6	1-65-0-0-1	10	0.0505347	0.0732237
15444	BCKDHB	1-65-0-0-1	10	0.0505347	0.0732237
17428	MTERF1	1-65-0-0-1	10	0.0505347	0.0732237
17474	BET1	1-65-0-0-1	10	0.0505347	0.0732237
17792	ATXN7L1	1-65-0-0-1	10	0.0505347	0.0732237
21392	RC3H2	1-65-0-0-1	10	0.0505347	0.0732237
33962	FTO	1-65-0-0-1	10	0.0505347	0.0732237
38282	CD226	1-65-0-0-1	10	0.0505347	0.0732237
2380	VTCN1	1-5-4-0-0	10	0.039111	0.0347551
5216	CCDC88A	1-5-4-0-0	10	0.039111	0.0347551
7276	SLC16A14	1-5-4-0-0	10	0.039111	0.0347551
9346	PIK3CB	1-5-4-0-0	10	0.039111	0.0347551
10664	NFXL1	1-5-4-0-0	10	0.039111	0.0347551
11670	CBR4	1-5-4-0-0	10	0.039111	0.0347551
12138	LMBRD2	1-5-4-0-0	10	0.039111	0.0347551
15502	SLC35A1	1-5-4-0-0	10	0.039111	0.0347551
15898	VNN3	1-5-4-0-0	10	0.039111	0.0347551
38002	RPRD1A	1-5-4-0-0	10	0.039111	0.0347551
1506	SCP2	1-5-0-2-0	10	0.0369158	0
20272	SMARCA2	1-5-0-2-0	10	0.0369158	0
21692	RAPGEF1	1-5-0-2-0	10	0.0369158	0
23224	ACTR1A	1-5-0-2-0	10	0.0369158	0
29238	STK24	1-5-0-2-0	10	0.0369158	0
30720	ATXN3	1-5-0-2-0	10	0.0369158	0
31766	MINDY2	1-5-0-2-0	10	0.0369158	0
41458	PSMF1	1-5-0-2-0	10	0.0369158	0
41516	PTPRA	1-5-0-2-0	10	0.0369158	0
44818	OGT	1-5-0-2-0	10	0.0369158	0
8048	AC006059.1	1-326-0-0-0	10	0.0254772	0.0396202
10232	MXD4	1-326-0-0-0	10	0.0254772	0.0396202
15786	PLN	1-326-0-0-0	10	0.0254772	0.0396202
17178	AC068533.3	1-326-0-0-0	10	0.0254772	0.0396202
19964	AC022973.4	1-326-0-0-0	10	0.0254772	0.0396202
24754	PLCB3	1-326-0-0-0	10	0.0254772	0.0396202
34064	KATNB1	1-326-0-0-0	10	0.0254772	0.0396202
41122	KIR2DL1	1-326-0-0-0	10	0.0254772	0.0396202
41126	KIR3DL1	1-326-0-0-0	10	0.0254772	0.0396202
42846	AP000331.1	1-326-0-0-0	10	0.0254772	0.0396202
1936	LRRC8D	1-280-0-0-0	10	0.041358	0.0465137
2082	AC093157.1	1-280-0-0-0	10	0.041358	0.0465137
6382	BAZ2B	1-280-0-0-0	10	0.041358	0.0465137
7026	AC093865.1	1-280-0-0-0	10	0.041358	0.0465137
7256	MFF	1-280-0-0-0	10	0.041358	0.0465137
10914	MRPL1	1-280-0-0-0	10	0.041358	0.0465137
13016	SRFBP1	1-280-0-0-0	10	0.041358	0.0465137
26662	MED21	1-280-0-0-0	10	0.041358	0.0465137
30472	AL049780.1	1-280-0-0-0	10	0.041358	0.0465137
45240	ENOX2	1-280-0-0-0	10	0.041358	0.0465137
11134	NFKB1	1-270-0-0-0	10	0.0819242	0.0805522
11812	ACSL1	1-270-0-0-0	10	0.0819242	0.0805522
12840	CHD1	1-270-0-0-0	10	0.0819242	0.0805522
19020	FGFR1	1-270-0-0-0	10	0.0819242	0.0805522
30916	TRAF3	1-270-0-0-0	10	0.0819242	0.0805522
31828	LACTB	1-270-0-0-0	10	0.0819242	0.0805522
37868	RBBP8	1-270-0-0-0	10	0.0819242	0.0805522
39434	SLC35E1	1-270-0-0-0	10	0.0819242	0.0805522
40470	RELB	1-270-0-0-0	10	0.0819242	0.0805522
43798	APOBEC3G	1-270-0-0-0	10	0.0819242	0.0805522
1526	LRP8	1-25-0-1-0	10	0.052254	0.0663598
2900	ASH1L	1-25-0-1-0	10	0.052254	0.0663598
4526	LINC00298	1-25-0-1-0	10	0.052254	0.0663598
5744	ANKRD36C	1-25-0-1-0	10	0.052254	0.0663598
7406	SCLY	1-25-0-1-0	10	0.052254	0.0663598
14954	MAPK14	1-25-0-1-0	10	0.052254	0.0663598
17712	PRKRIP1	1-25-0-1-0	10	0.052254	0.0663598
20646	EBLN3P	1-25-0-1-0	10	0.052254	0.0663598
20890	TUT7	1-25-0-1-0	10	0.052254	0.0663598
42318	NFATC2	1-25-0-1-0	10	0.052254	0.0663598
1596	DAB1	1-2-5-0-0	10	0.0355495	0.0515732
4902	CAPN14	1-2-5-0-0	10	0.0355495	0.0515732
5474	SFXN5	1-2-5-0-0	10	0.0355495	0.0515732
6570	LNPK	1-2-5-0-0	10	0.0355495	0.0515732
12516	PTCD2	1-2-5-0-0	10	0.0355495	0.0515732
15294	KIAA1586	1-2-5-0-0	10	0.0355495	0.0515732
17394	ADAM22	1-2-5-0-0	10	0.0355495	0.0515732
20428	MLLT3	1-2-5-0-0	10	0.0355495	0.0515732
26448	TAS2R30	1-2-5-0-0	10	0.0355495	0.0515732
44540	ZNF81	1-2-5-0-0	10	0.0355495	0.0515732
850	EPB41	1-192-0-0-0	10	0.0512408	0.0382124
11182	GSTCD	1-192-0-0-0	10	0.0512408	0.0382124
12662	MSH3	1-192-0-0-0	10	0.0512408	0.0382124
15790	MCM9	1-192-0-0-0	10	0.0512408	0.0382124
20410	DENND4C	1-192-0-0-0	10	0.0512408	0.0382124
25364	SYTL2	1-192-0-0-0	10	0.0512408	0.0382124
25796	CCDC84	1-192-0-0-0	10	0.0512408	0.0382124
27900	PARPBP	1-192-0-0-0	10	0.0512408	0.0382124
28600	IFT88	1-192-0-0-0	10	0.0512408	0.0382124
29376	TUBGCP3	1-192-0-0-0	10	0.0512408	0.0382124
6488	UBR3	1-18-2-0-0	10	0.0411729	0.0595443
10280	STX18	1-18-2-0-0	10	0.0411729	0.0595443
12714	TMEM161B	1-18-2-0-0	10	0.0411729	0.0595443
13214	SMAD5	1-18-2-0-0	10	0.0411729	0.0595443
17898	TES	1-18-2-0-0	10	0.0411729	0.0595443
18352	ZNF746	1-18-2-0-0	10	0.0411729	0.0595443
21402	RABGAP1	1-18-2-0-0	10	0.0411729	0.0595443
27562	FRS2	1-18-2-0-0	10	0.0411729	0.0595443
31680	FAM214A	1-18-2-0-0	10	0.0411729	0.0595443
32210	IREB2	1-18-2-0-0	10	0.0411729	0.0595443
8450	SPCS1	1-168-0-0-0	10	0.0479904	0.0854948
13086	HINT1	1-168-0-0-0	10	0.0479904	0.0854948
14790	GPSM3	1-168-0-0-0	10	0.0479904	0.0854948
15076	TOMM6	1-168-0-0-0	10	0.0479904	0.0854948
16678	TOMM7	1-168-0-0-0	10	0.0479904	0.0854948
18270	TRBC1	1-168-0-0-0	10	0.0479904	0.0854948
19598	UQCRB	1-168-0-0-0	10	0.0479904	0.0854948
21878	SSNA1	1-168-0-0-0	10	0.0479904	0.0854948
24670	POLR2G	1-168-0-0-0	10	0.0479904	0.0854948
39210	WDR83OS	1-168-0-0-0	10	0.0479904	0.0854948
2344	LINC01765	1-147-1-0-0	10	0.0273691	0.0354869
5160	AC093635.1	1-147-1-0-0	10	0.0273691	0.0354869
20582	AL353795.2	1-147-1-0-0	10	0.0273691	0.0354869
22342	AL392046.1	1-147-1-0-0	10	0.0273691	0.0354869
23286	CFAP43	1-147-1-0-0	10	0.0273691	0.0354869
23952	TMEM41B	1-147-1-0-0	10	0.0273691	0.0354869
26506	FAM234B	1-147-1-0-0	10	0.0273691	0.0354869
33936	AC007728.2	1-147-1-0-0	10	0.0273691	0.0354869
37680	AP005329.1	1-147-1-0-0	10	0.0273691	0.0354869
41154	SYT5	1-147-1-0-0	10	0.0273691	0.0354869
190	C1orf174	1-112-0-0-0	10	0.0445092	0.0635677
2788	SLC39A1	1-112-0-0-0	10	0.0445092	0.0635677
3630	ZNF281	1-112-0-0-0	10	0.0445092	0.0635677
11780	ING2	1-112-0-0-0	10	0.0445092	0.0635677
25958	SRPRA	1-112-0-0-0	10	0.0445092	0.0635677
26226	MLF2	1-112-0-0-0	10	0.0445092	0.0635677
28736	ALOX5AP	1-112-0-0-0	10	0.0445092	0.0635677
29688	AL096870.8	1-112-0-0-0	10	0.0445092	0.0635677
36034	CCL3	1-112-0-0-0	10	0.0445092	0.0635677
41542	C20orf27	1-112-0-0-0	10	0.0445092	0.0635677
618	ZNF436-AS1	1-110-0-0-0	10	0.0213936	0.0279581
6408	LINC01806	1-110-0-0-0	10	0.0213936	0.0279581
8996	POPDC2	1-110-0-0-0	10	0.0213936	0.0279581
9194	RAB43	1-110-0-0-0	10	0.0213936	0.0279581
10704	AC104066.4	1-110-0-0-0	10	0.0213936	0.0279581
26582	PYROXD1	1-110-0-0-0	10	0.0213936	0.0279581
30882	LINC02320	1-110-0-0-0	10	0.0213936	0.0279581
31076	SNURF	1-110-0-0-0	10	0.0213936	0.0279581
35668	AC026254.2	1-110-0-0-0	10	0.0213936	0.0279581
38604	THOP1	1-110-0-0-0	10	0.0213936	0.0279581
1750	ZRANB2	1-90-1-0-0	9	0.0376833	0.0379715
4934	AL133243.2	1-90-1-0-0	9	0.0376833	0.0379715
9762	MFN1	1-90-1-0-0	9	0.0376833	0.0379715
13944	ZNF354C	1-90-1-0-0	9	0.0376833	0.0379715
20708	AL590399.1	1-90-1-0-0	9	0.0376833	0.0379715
22778	SAMD8	1-90-1-0-0	9	0.0376833	0.0379715
27428	MON2	1-90-1-0-0	9	0.0376833	0.0379715
32488	CRTC3-AS1	1-90-1-0-0	9	0.0376833	0.0379715
34036	RSPRY1	1-90-1-0-0	9	0.0376833	0.0379715
2998	NTRK1	1-71-0-0-0	9	0.00672328	0.0086058
8004	AC099332.2	1-71-0-0-0	9	0.00672328	0.0086058
8614	TAFA4	1-71-0-0-0	9	0.00672328	0.0086058
10706	RASL11B	1-71-0-0-0	9	0.00672328	0.0086058
11842	AC093797.1	1-71-0-0-0	9	0.00672328	0.0086058
14030	AL035696.3	1-71-0-0-0	9	0.00672328	0.0086058
23424	NANOS1	1-71-0-0-0	9	0.00672328	0.0086058
37388	CCDC40	1-71-0-0-0	9	0.00672328	0.0086058
42830	AP000320.1	1-71-0-0-0	9	0.00672328	0.0086058
2999	NTRK1_flip	1-70-0-0-0	9	0.00672328	0.0086058
8005	AC099332.2_flip	1-70-0-0-0	9	0.00672328	0.0086058
8615	TAFA4_flip	1-70-0-0-0	9	0.00672328	0.0086058
10707	RASL11B_flip	1-70-0-0-0	9	0.00672328	0.0086058
11843	AC093797.1_flip	1-70-0-0-0	9	0.00672328	0.0086058
14031	AL035696.3_flip	1-70-0-0-0	9	0.00672328	0.0086058
23425	NANOS1_flip	1-70-0-0-0	9	0.00672328	0.0086058
37389	CCDC40_flip	1-70-0-0-0	9	0.00672328	0.0086058
42831	AP000320.1_flip	1-70-0-0-0	9	0.00672328	0.0086058
6211	TMEM163_flip	1-65-2-0-0	9	0.0207031	0.0274279
12051	CDH12_flip	1-65-2-0-0	9	0.0207031	0.0274279
21153	MRPL50_flip	1-65-2-0-0	9	0.0207031	0.0274279
25847	NECTIN1-AS1_flip	1-65-2-0-0	9	0.0207031	0.0274279
29697	CIDEB_flip	1-65-2-0-0	9	0.0207031	0.0274279
34827	AC092120.3_flip	1-65-2-0-0	9	0.0207031	0.0274279
42635	AF127577.2_flip	1-65-2-0-0	9	0.0207031	0.0274279
42729	AF129075.3_flip	1-65-2-0-0	9	0.0207031	0.0274279
43277	TMEM191C_flip	1-65-2-0-0	9	0.0207031	0.0274279
3612	AL450352.1	1-37-2-0-0	9	0.0459522	0
4044	NVL	1-37-2-0-0	9	0.0459522	0
5418	PCBP1-AS1	1-37-2-0-0	9	0.0459522	0
10116	RUBCN	1-37-2-0-0	9	0.0459522	0
34268	NFATC3	1-37-2-0-0	9	0.0459522	0
35622	AKAP10	1-37-2-0-0	9	0.0459522	0
39712	ZNF429	1-37-2-0-0	9	0.0459522	0
44196	AL683807.1	1-37-2-0-0	9	0.0459522	0
44200	DHRSX	1-37-2-0-0	9	0.0459522	0
7966	SLC22A14	1-36-1-0-0	9	0.0058863	0
17067	NACAD_flip	1-36-1-0-0	9	0.0058863	0
17862	LRRN3	1-36-1-0-0	9	0.0058863	0
22228	KIAA1217	1-36-1-0-0	9	0.0058863	0
24215	PRRG4_flip	1-36-1-0-0	9	0.0058863	0
27746	C12orf74	1-36-1-0-0	9	0.0058863	0
28292	UNC119B	1-36-1-0-0	9	0.0058863	0
31306	KNSTRN	1-36-1-0-0	9	0.0058863	0
32881	RAB26_flip	1-36-1-0-0	9	0.0058863	0
2354	ATP1A1	1-324-0-0-0	9	0.0736202	0.0880302
3902	AL360091.1	1-324-0-0-0	9	0.0736202	0.0880302
10904	CCNI	1-324-0-0-0	9	0.0736202	0.0880302
18078	LINC-PINT	1-324-0-0-0	9	0.0736202	0.0880302
19058	AC009630.1	1-324-0-0-0	9	0.0736202	0.0880302
26938	RND1	1-324-0-0-0	9	0.0736202	0.0880302
31922	DENND4A	1-324-0-0-0	9	0.0736202	0.0880302
31926	AC011939.2	1-324-0-0-0	9	0.0736202	0.0880302
38378	SLC66A2	1-324-0-0-0	9	0.0736202	0.0880302
1676	CACHD1	1-309-0-0-0	9	0.00463464	0.0114048
8990	CD80	1-309-0-0-0	9	0.00463464	0.0114048
13498	SH3TC2-DT	1-309-0-0-0	9	0.00463464	0.0114048
19586	AC068189.1	1-309-0-0-0	9	0.00463464	0.0114048
22506	ZWINT	1-309-0-0-0	9	0.00463464	0.0114048
31916	INTS14	1-309-0-0-0	9	0.00463464	0.0114048
34572	LINC01229	1-309-0-0-0	9	0.00463464	0.0114048
36018	CCL16	1-309-0-0-0	9	0.00463464	0.0114048
37450	AC110285.5	1-309-0-0-0	9	0.00463464	0.0114048
2614	RPRD2	1-27-9-0-0	9	0.0301232	0
4464	TMEM18	1-27-9-0-0	9	0.0301232	0
8242	AC137630.2	1-27-9-0-0	9	0.0301232	0
15408	AL080250.1	1-27-9-0-0	9	0.0301232	0
16114	KATNA1	1-27-9-0-0	9	0.0301232	0
21140	TEX10	1-27-9-0-0	9	0.0301232	0
28384	DENR	1-27-9-0-0	9	0.0301232	0
31872	OAZ2	1-27-9-0-0	9	0.0301232	0
31878	AC100830.1	1-27-9-0-0	9	0.0301232	0
3512	AL078645.1	1-255-2-0-0	9	0.031914	0.031759
19326	TERF1	1-255-2-0-0	9	0.031914	0.031759
19530	SLC26A7	1-255-2-0-0	9	0.031914	0.031759
20430	FOCAD	1-255-2-0-0	9	0.031914	0.031759
21924	DIP2C	1-255-2-0-0	9	0.031914	0.031759
22204	BMI1	1-255-2-0-0	9	0.031914	0.031759
22274	MPP7-DT	1-255-2-0-0	9	0.031914	0.031759
28374	KNTC1	1-255-2-0-0	9	0.031914	0.031759
30786	AL133467.2	1-255-2-0-0	9	0.031914	0.031759
9040	IQCB1	1-20-0-0-0	9	0.0562247	0.0859134
10000	ATP13A3	1-20-0-0-0	9	0.0562247	0.0859134
10884	NUP54	1-20-0-0-0	9	0.0562247	0.0859134
17892	LINC01393	1-20-0-0-0	9	0.0562247	0.0859134
20456	CAAP1	1-20-0-0-0	9	0.0562247	0.0859134
25438	VSTM5	1-20-0-0-0	9	0.0562247	0.0859134
34408	AP1G1	1-20-0-0-0	9	0.0562247	0.0859134
36708	SPAG9	1-20-0-0-0	9	0.0562247	0.0859134
42904	DYRK1A	1-20-0-0-0	9	0.0562247	0.0859134
558	EIF4G3	1-2-2-0-0	9	0.0478439	0.0557233
5030	SOS1	1-2-2-0-0	9	0.0478439	0.0557233
6224	R3HDM1	1-2-2-0-0	9	0.0478439	0.0557233
6934	ABI2	1-2-2-0-0	9	0.0478439	0.0557233
11188	TBCK	1-2-2-0-0	9	0.0478439	0.0557233
11436	ELMOD2	1-2-2-0-0	9	0.0478439	0.0557233
29148	RBM26	1-2-2-0-0	9	0.0478439	0.0557233
37810	CEP192	1-2-2-0-0	9	0.0478439	0.0557233
44656	KANTR	1-2-2-0-0	9	0.0478439	0.0557233
192	LINC01134	1-2-0-0-1	9	0.0455704	0.0516396
3574	UCHL5	1-2-0-0-1	9	0.0455704	0.0516396
11232	PLA2G12A	1-2-0-0-1	9	0.0455704	0.0516396
14128	FARS2	1-2-0-0-1	9	0.0455704	0.0516396
14160	SNRNP48	1-2-0-0-1	9	0.0455704	0.0516396
18144	MTPN	1-2-0-0-1	9	0.0455704	0.0516396
20282	PUM3	1-2-0-0-1	9	0.0455704	0.0516396
23492	ACADSB	1-2-0-0-1	9	0.0455704	0.0516396
30656	FOXN3	1-2-0-0-1	9	0.0455704	0.0516396
2136	TAF13	1-180-0-0-0	9	0.0368144	0.0417757
11190	AIMP1	1-180-0-0-0	9	0.0368144	0.0417757
13574	FAT2	1-180-0-0-0	9	0.0368144	0.0417757
13632	HAVCR1	1-180-0-0-0	9	0.0368144	0.0417757
23016	AL157834.2	1-180-0-0-0	9	0.0368144	0.0417757
23564	LINC02666	1-180-0-0-0	9	0.0368144	0.0417757
23748	MUC6	1-180-0-0-0	9	0.0368144	0.0417757
28368	ZCCHC8	1-180-0-0-0	9	0.0368144	0.0417757
37874	RIOK3	1-180-0-0-0	9	0.0368144	0.0417757
2046	SLC35A3	1-18-1-0-0	9	0.0469383	0.0928896
5328	SERTAD2	1-18-1-0-0	9	0.0469383	0.0928896
11552	FBXW7	1-18-1-0-0	9	0.0469383	0.0928896
12896	MAN2A1	1-18-1-0-0	9	0.0469383	0.0928896
15886	MED23	1-18-1-0-0	9	0.0469383	0.0928896
16098	TAB2	1-18-1-0-0	9	0.0469383	0.0928896
28608	XPO4	1-18-1-0-0	9	0.0469383	0.0928896
31946	ZWILCH	1-18-1-0-0	9	0.0469383	0.0928896
36804	RNF43	1-18-1-0-0	9	0.0469383	0.0928896
4108	ZNF678	1-16-4-0-0	9	0.032944	0.0496775
4964	FEZ2	1-16-4-0-0	9	0.032944	0.0496775
12354	MAP3K1	1-16-4-0-0	9	0.032944	0.0496775
12998	DTWD2	1-16-4-0-0	9	0.032944	0.0496775
14146	RREB1	1-16-4-0-0	9	0.032944	0.0496775
16602	TMEM106B	1-16-4-0-0	9	0.032944	0.0496775
19666	ANKRD46	1-16-4-0-0	9	0.032944	0.0496775
31456	TUBGCP4	1-16-4-0-0	9	0.032944	0.0496775
44914	CHM	1-16-4-0-0	9	0.032944	0.0496775
2780	GATAD2B	1-145-0-0-0	9	0.059768	0.061008
5178	ASB3	1-145-0-0-0	9	0.059768	0.061008
10006	TMEM44	1-145-0-0-0	9	0.059768	0.061008
11138	UBE2D3	1-145-0-0-0	9	0.059768	0.061008
12748	AC093298.2	1-145-0-0-0	9	0.059768	0.061008
17970	ZNF800	1-145-0-0-0	9	0.059768	0.061008
22704	ECD	1-145-0-0-0	9	0.059768	0.061008
36526	AC068234.2	1-145-0-0-0	9	0.059768	0.061008
43860	EP300	1-145-0-0-0	9	0.059768	0.061008
4698	ATAD2B	1-14-1-0-0	9	0.0510258	0.0833349
7878	STT3B	1-14-1-0-0	9	0.0510258	0.0833349
10712	FIP1L1	1-14-1-0-0	9	0.0510258	0.0833349
11296	METTL14	1-14-1-0-0	9	0.0510258	0.0833349
12520	TNPO1	1-14-1-0-0	9	0.0510258	0.0833349
17840	DLD	1-14-1-0-0	9	0.0510258	0.0833349
19980	EFR3A	1-14-1-0-0	9	0.0510258	0.0833349
22958	PCGF5	1-14-1-0-0	9	0.0510258	0.0833349
30134	PPM1A	1-14-1-0-0	9	0.0510258	0.0833349
8832	CD47	1-123-0-0-0	9	0.0574478	0.0616277
13398	DIAPH1	1-123-0-0-0	9	0.0574478	0.0616277
18618	XKR6	1-123-0-0-0	9	0.0574478	0.0616277
19272	SGK3	1-123-0-0-0	9	0.0574478	0.0616277
21064	ZNF782	1-123-0-0-0	9	0.0574478	0.0616277
22546	ZNF365	1-123-0-0-0	9	0.0574478	0.0616277
27768	CRADD	1-123-0-0-0	9	0.0574478	0.0616277
36416	GPATCH8	1-123-0-0-0	9	0.0574478	0.0616277
44346	BCLAF3	1-123-0-0-0	9	0.0574478	0.0616277
1472	KTI12	1-11-5-0-0	9	0.0103374	0.0176337
2908	MSTO1	1-11-5-0-0	9	0.0103374	0.0176337
18398	GIMAP1	1-11-5-0-0	9	0.0103374	0.0176337
21506	ENG	1-11-5-0-0	9	0.0103374	0.0176337
29634	DHRS4L2	1-11-5-0-0	9	0.0103374	0.0176337
32086	UBL7	1-11-5-0-0	9	0.0103374	0.0176337
32404	MRPS11	1-11-5-0-0	9	0.0103374	0.0176337
34324	NIP7	1-11-5-0-0	9	0.0103374	0.0176337
36590	HOXB4	1-11-5-0-0	9	0.0103374	0.0176337
5730	ZNF2	1-1-7-0-0	9	0.0334916	0.0272054
6892	TRAK2	1-1-7-0-0	9	0.0334916	0.0272054
7654	IRAK2	1-1-7-0-0	9	0.0334916	0.0272054
10806	SULT1B1	1-1-7-0-0	9	0.0334916	0.0272054
14192	TMEM14B	1-1-7-0-0	9	0.0334916	0.0272054
21562	GLE1	1-1-7-0-0	9	0.0334916	0.0272054
24666	TTC9C	1-1-7-0-0	9	0.0334916	0.0272054
27764	SOCS2-AS1	1-1-7-0-0	9	0.0334916	0.0272054
36042	AC243829.1	1-1-7-0-0	9	0.0334916	0.0272054
3540	ODR4	1-90-0-0-0	8	0.0292541	0.0510482
6844	C2orf69	1-90-0-0-0	8	0.0292541	0.0510482
11104	TRMT10A	1-90-0-0-0	8	0.0292541	0.0510482
18632	MTMR9	1-90-0-0-0	8	0.0292541	0.0510482
23130	CHUK	1-90-0-0-0	8	0.0292541	0.0510482
33244	ERCC4	1-90-0-0-0	8	0.0292541	0.0510482
34436	ZFHX3	1-90-0-0-0	8	0.0292541	0.0510482
43708	ANKRD54	1-90-0-0-0	8	0.0292541	0.0510482
10832	AC053527.2	1-65-1-0-1	8	0.0294867	0.0342907
18196	SLC37A3	1-65-1-0-1	8	0.0294867	0.0342907
20798	C9orf40	1-65-1-0-1	8	0.0294867	0.0342907
21008	ZNF169	1-65-1-0-1	8	0.0294867	0.0342907
23068	MMS19	1-65-1-0-1	8	0.0294867	0.0342907
30172	PPP2R5E	1-65-1-0-1	8	0.0294867	0.0342907
30810	LINC02325	1-65-1-0-1	8	0.0294867	0.0342907
40754	SLC6A16	1-65-1-0-1	8	0.0294867	0.0342907
2172	AMPD2	1-56-0-0-0	8	0.0405332	0.0522499
6082	CCDC93	1-56-0-0-0	8	0.0405332	0.0522499
11772	WWC2	1-56-0-0-0	8	0.0405332	0.0522499
20862	AL354733.3	1-56-0-0-0	8	0.0405332	0.0522499
26622	AC023510.1	1-56-0-0-0	8	0.0405332	0.0522499
33926	NKD1	1-56-0-0-0	8	0.0405332	0.0522499
40942	ZNF350-AS1	1-56-0-0-0	8	0.0405332	0.0522499
44010	SMC1B	1-56-0-0-0	8	0.0405332	0.0522499
3980	IARS2	1-5-5-0-0	8	0.0501496	0.0508013
11092	METAP1	1-5-5-0-0	8	0.0501496	0.0508013
14062	MYLK4	1-5-5-0-0	8	0.0501496	0.0508013
17006	BLVRA	1-5-5-0-0	8	0.0501496	0.0508013
22542	ARID5B	1-5-5-0-0	8	0.0501496	0.0508013
26160	GALNT8	1-5-5-0-0	8	0.0501496	0.0508013
31536	SPATA5L1	1-5-5-0-0	8	0.0501496	0.0508013
44706	KLF8	1-5-5-0-0	8	0.0501496	0.0508013
5790	ANKRD39	1-45-1-0-0	8	0.0294409	0.0361085
7454	RNPEPL1	1-45-1-0-0	8	0.0294409	0.0361085
10198	CTBP1	1-45-1-0-0	8	0.0294409	0.0361085
11412	NDUFC1	1-45-1-0-0	8	0.0294409	0.0361085
25132	LAMTOR1	1-45-1-0-0	8	0.0294409	0.0361085
30954	AL049840.5	1-45-1-0-0	8	0.0294409	0.0361085
38838	SLC25A23	1-45-1-0-0	8	0.0294409	0.0361085
44564	WAS	1-45-1-0-0	8	0.0294409	0.0361085
5791	ANKRD39_flip	1-44-1-0-0	8	0.0294409	0.0361085
7455	RNPEPL1_flip	1-44-1-0-0	8	0.0294409	0.0361085
10199	CTBP1_flip	1-44-1-0-0	8	0.0294409	0.0361085
11413	NDUFC1_flip	1-44-1-0-0	8	0.0294409	0.0361085
25133	LAMTOR1_flip	1-44-1-0-0	8	0.0294409	0.0361085
30955	AL049840.5_flip	1-44-1-0-0	8	0.0294409	0.0361085
38839	SLC25A23_flip	1-44-1-0-0	8	0.0294409	0.0361085
44565	WAS_flip	1-44-1-0-0	8	0.0294409	0.0361085
476	NBPF1	1-37-2-1-0	8	0.0388629	0.0357796
3008	ETV3	1-37-2-1-0	8	0.0388629	0.0357796
16484	AC092428.1	1-37-2-1-0	8	0.0388629	0.0357796
21082	TMOD1	1-37-2-1-0	8	0.0388629	0.0357796
25868	MIR100HG	1-37-2-1-0	8	0.0388629	0.0357796
34412	IST1	1-37-2-1-0	8	0.0388629	0.0357796
40364	CEACAM1	1-37-2-1-0	8	0.0388629	0.0357796
41596	MCM8-AS1	1-37-2-1-0	8	0.0388629	0.0357796
742	AL513365.2	1-350-0-0-0	8	0.0641011	0.0492517
7742	SH3BP5	1-350-0-0-0	8	0.0641011	0.0492517
16444	MAD1L1	1-350-0-0-0	8	0.0641011	0.0492517
25166	ATG16L2	1-350-0-0-0	8	0.0641011	0.0492517
36172	IKZF3	1-350-0-0-0	8	0.0641011	0.0492517
38500	AC027307.3	1-350-0-0-0	8	0.0641011	0.0492517
40062	ZNF585A	1-350-0-0-0	8	0.0641011	0.0492517
40338	AC010247.1	1-350-0-0-0	8	0.0641011	0.0492517
6292	ORC4	1-28-3-0-0	8	0.0318782	0.0540413
6740	HIBCH	1-28-3-0-0	8	0.0318782	0.0540413
17494	PON2	1-28-3-0-0	8	0.0318782	0.0540413
17876	TMEM168	1-28-3-0-0	8	0.0318782	0.0540413
18820	ADAM28	1-28-3-0-0	8	0.0318782	0.0540413
28980	CDADC1	1-28-3-0-0	8	0.0318782	0.0540413
35000	METTL16	1-28-3-0-0	8	0.0318782	0.0540413
40056	ZNF420	1-28-3-0-0	8	0.0318782	0.0540413
1848	AL359762.1	1-277-0-0-0	8	0.00577719	0.0101635
8402	ACY1	1-277-0-0-0	8	0.00577719	0.0101635
9854	ALG3	1-277-0-0-0	8	0.00577719	0.0101635
22996	PLCE1	1-277-0-0-0	8	0.00577719	0.0101635
28044	MVK	1-277-0-0-0	8	0.00577719	0.0101635
34114	AC009081.2	1-277-0-0-0	8	0.00577719	0.0101635
35206	ASGR1	1-277-0-0-0	8	0.00577719	0.0101635
45202	AL008633.1	1-277-0-0-0	8	0.00577719	0.0101635
508	EMC1-AS1	1-27-0-2-0	8	0.0552202	0.0416002
3652	AC096677.1	1-27-0-2-0	8	0.0552202	0.0416002
4128	IBA57-DT	1-27-0-2-0	8	0.0552202	0.0416002
9448	WWTR1	1-27-0-2-0	8	0.0552202	0.0416002
9900	TRA2B	1-27-0-2-0	8	0.0552202	0.0416002
22250	ANKRD26	1-27-0-2-0	8	0.0552202	0.0416002
29994	AL139317.5	1-27-0-2-0	8	0.0552202	0.0416002
36872	AC011921.1	1-27-0-2-0	8	0.0552202	0.0416002
649	CNR2_flip	1-268-0-0-0	8	0.00968525	0.0112027
1117	GJA9_flip	1-268-0-0-0	8	0.00968525	0.0112027
10799	GNRHR_flip	1-268-0-0-0	8	0.00968525	0.0112027
13557	IRGM_flip	1-268-0-0-0	8	0.00968525	0.0112027
20779	AL583829.1_flip	1-268-0-0-0	8	0.00968525	0.0112027
34501	AC025287.3_flip	1-268-0-0-0	8	0.00968525	0.0112027
44195	ASMT_flip	1-268-0-0-0	8	0.00968525	0.0112027
44607	PRICKLE3_flip	1-268-0-0-0	8	0.00968525	0.0112027
8800	CEP97	1-25-0-4-0	8	0.0497719	0.0751039
17124	VOPP1	1-25-0-4-0	8	0.0497719	0.0751039
21034	PTCH1	1-25-0-4-0	8	0.0497719	0.0751039
23428	DENND10	1-25-0-4-0	8	0.0497719	0.0751039
30380	PSEN1	1-25-0-4-0	8	0.0497719	0.0751039
37812	LDLRAD4	1-25-0-4-0	8	0.0497719	0.0751039
37848	ABHD3	1-25-0-4-0	8	0.0497719	0.0751039
43434	MIAT	1-25-0-4-0	8	0.0497719	0.0751039
470	NECAP2	1-229-0-0-0	8	0.0132195	0.0219608
24558	CCDC86	1-229-0-0-0	8	0.0132195	0.0219608
31700	PIGBOS1	1-229-0-0-0	8	0.0132195	0.0219608
36548	LRRC46	1-229-0-0-0	8	0.0132195	0.0219608
40822	AKT1S1	1-229-0-0-0	8	0.0132195	0.0219608
44086	ALG12	1-229-0-0-0	8	0.0132195	0.0219608
44146	U62317.1	1-229-0-0-0	8	0.0132195	0.0219608
44580	TIMM17B	1-229-0-0-0	8	0.0132195	0.0219608
1032	AL139286.3	1-211-1-0-0	8	0.0691361	0.0743249
7676	AC022001.3	1-211-1-0-0	8	0.0691361	0.0743249
11366	PGRMC2	1-211-1-0-0	8	0.0691361	0.0743249
17816	HBP1	1-211-1-0-0	8	0.0691361	0.0743249
20046	AGO2	1-211-1-0-0	8	0.0691361	0.0743249
21462	ZBTB43	1-211-1-0-0	8	0.0691361	0.0743249
23328	PDCD4	1-211-1-0-0	8	0.0691361	0.0743249
43948	ARFGAP3	1-211-1-0-0	8	0.0691361	0.0743249
3336	SUCO	1-20-6-0-0	8	0.0629486	0.0983777
5010	ATL2	1-20-6-0-0	8	0.0629486	0.0983777
12084	GOLPH3	1-20-6-0-0	8	0.0629486	0.0983777
23336	SHOC2	1-20-6-0-0	8	0.0629486	0.0983777
26630	KRAS	1-20-6-0-0	8	0.0629486	0.0983777
37844	ESCO1	1-20-6-0-0	8	0.0629486	0.0983777
41784	NANP	1-20-6-0-0	8	0.0629486	0.0983777
44594	CCDC120	1-20-6-0-0	8	0.0629486	0.0983777
9986	OPA1	1-20-1-0-0	8	0.0531356	0.0519162
13662	CLINT1	1-20-1-0-0	8	0.0531356	0.0519162
22872	MMRN2	1-20-1-0-0	8	0.0531356	0.0519162
28948	SUCLA2	1-20-1-0-0	8	0.0531356	0.0519162
30460	YLPM1	1-20-1-0-0	8	0.0531356	0.0519162
30762	IFI27	1-20-1-0-0	8	0.0531356	0.0519162
35510	MED9	1-20-1-0-0	8	0.0531356	0.0519162
37990	INO80C	1-20-1-0-0	8	0.0531356	0.0519162
3448	ACBD6	1-182-0-0-0	8	0.0435435	0
5096	CAMKMT	1-182-0-0-0	8	0.0435435	0
15014	ZFAND3	1-182-0-0-0	8	0.0435435	0
15368	KCNQ5	1-182-0-0-0	8	0.0435435	0
28856	VWA8	1-182-0-0-0	8	0.0435435	0
31720	RFX7	1-182-0-0-0	8	0.0435435	0
38224	PIGN	1-182-0-0-0	8	0.0435435	0
44412	TAB3	1-182-0-0-0	8	0.0435435	0
94	FNDC10	1-168-2-0-0	8	0.0117536	0.0251861
102	MMP23B	1-168-2-0-0	8	0.0117536	0.0251861
18462	LINC01003	1-168-2-0-0	8	0.0117536	0.0251861
18482	AC144652.1	1-168-2-0-0	8	0.0117536	0.0251861
27080	ATG101	1-168-2-0-0	8	0.0117536	0.0251861
37522	DCXR	1-168-2-0-0	8	0.0117536	0.0251861
39368	ILVBL	1-168-2-0-0	8	0.0117536	0.0251861
41968	ERGIC3	1-168-2-0-0	8	0.0117536	0.0251861
13052	LMNB1	1-164-1-0-0	8	0.0760747	0.0634074
15978	TNFAIP3	1-164-1-0-0	8	0.0760747	0.0634074
21648	NCS1	1-164-1-0-0	8	0.0760747	0.0634074
31460	MAP1A	1-164-1-0-0	8	0.0760747	0.0634074
31850	AC073167.1	1-164-1-0-0	8	0.0760747	0.0634074
37788	AFG3L2	1-164-1-0-0	8	0.0760747	0.0634074
42380	AL109955.1	1-164-1-0-0	8	0.0760747	0.0634074
43380	ADORA2A-AS1	1-164-1-0-0	8	0.0760747	0.0634074
2028	DPYD	1-16-0-0-2	8	0.0379158	0.0586848
4344	AKT3	1-16-0-0-2	8	0.0379158	0.0586848
6116	CLASP1	1-16-0-0-2	8	0.0379158	0.0586848
12214	FBXO4	1-16-0-0-2	8	0.0379158	0.0586848
14290	KIF13A	1-16-0-0-2	8	0.0379158	0.0586848
18590	TNKS	1-16-0-0-2	8	0.0379158	0.0586848
20754	PTAR1	1-16-0-0-2	8	0.0379158	0.0586848
38310	ZNF407	1-16-0-0-2	8	0.0379158	0.0586848
2586	SF3B4	1-159-0-0-0	8	0.0366636	0.0420419
4150	HIST3H2A	1-159-0-0-0	8	0.0366636	0.0420419
24350	PEX16	1-159-0-0-0	8	0.0366636	0.0420419
27194	HNRNPA1	1-159-0-0-0	8	0.0366636	0.0420419
29680	GMPR2	1-159-0-0-0	8	0.0366636	0.0420419
39132	PRKCSH	1-159-0-0-0	8	0.0366636	0.0420419
39400	RAB8A	1-159-0-0-0	8	0.0366636	0.0420419
44842	FAM226B	1-159-0-0-0	8	0.0366636	0.0420419
836	TRNAU1AP	1-13-0-1-0	8	0.0267282	0.0259303
1404	MKNK1	1-13-0-1-0	8	0.0267282	0.0259303
18282	CASP2	1-13-0-1-0	8	0.0267282	0.0259303
23636	AL731769.2	1-13-0-1-0	8	0.0267282	0.0259303
23782	TSPAN32	1-13-0-1-0	8	0.0267282	0.0259303
25190	PAAF1	1-13-0-1-0	8	0.0267282	0.0259303
34828	SPG7	1-13-0-1-0	8	0.0267282	0.0259303
39688	ZNF737	1-13-0-1-0	8	0.0267282	0.0259303
4880	TOGARAM2	1-129-3-0-0	8	0.0415243	0.0446352
7226	WDFY1	1-129-3-0-0	8	0.0415243	0.0446352
9468	SELENOT	1-129-3-0-0	8	0.0415243	0.0446352
16036	ADAT2	1-129-3-0-0	8	0.0415243	0.0446352
17276	CASTOR2	1-129-3-0-0	8	0.0415243	0.0446352
19270	VCPIP1	1-129-3-0-0	8	0.0415243	0.0446352
19398	AC036214.2	1-129-3-0-0	8	0.0415243	0.0446352
29404	CUL4A	1-129-3-0-0	8	0.0415243	0.0446352
2923	RIT1_flip	1-124-0-1-0	8	0.0701465	0.079668
14681	NFKBIL1_flip	1-124-0-1-0	8	0.0701465	0.079668
17241	BUD23_flip	1-124-0-1-0	8	0.0701465	0.079668
17553	ZNF394_flip	1-124-0-1-0	8	0.0701465	0.079668
25105	DHCR7_flip	1-124-0-1-0	8	0.0701465	0.079668
29597	C14orf119_flip	1-124-0-1-0	8	0.0701465	0.079668
40627	NAPA_flip	1-124-0-1-0	8	0.0701465	0.079668
42273	ZFAS1_flip	1-124-0-1-0	8	0.0701465	0.079668
2494	POLR3GL	1-11-3-1-0	8	0.0194003	0.0489135
6198	MZT2A	1-11-3-1-0	8	0.0194003	0.0489135
10270	LRPAP1	1-11-3-1-0	8	0.0194003	0.0489135
17540	PDAP1	1-11-3-1-0	8	0.0194003	0.0489135
18290	ZYX	1-11-3-1-0	8	0.0194003	0.0489135
30570	AHSA1	1-11-3-1-0	8	0.0194003	0.0489135
30764	IFI27L2	1-11-3-1-0	8	0.0194003	0.0489135
33718	DCTPP1	1-11-3-1-0	8	0.0194003	0.0489135
766	SLC9A1	1-10-8-0-0	8	0.0556674	0.172555
896	ADGRB2	1-10-8-0-0	8	0.0556674	0.172555
19408	AC009812.1	1-10-8-0-0	8	0.0556674	0.172555
27374	DDIT3	1-10-8-0-0	8	0.0556674	0.172555
27486	AC026124.2	1-10-8-0-0	8	0.0556674	0.172555
38636	NCLN	1-10-8-0-0	8	0.0556674	0.172555
39336	LINC01841	1-10-8-0-0	8	0.0556674	0.172555
40242	SERTAD1	1-10-8-0-0	8	0.0556674	0.172555
1682	LINC01359	1-1-9-0-0	8	0.0170134	0.0251454
7228	MRPL44	1-1-9-0-0	8	0.0170134	0.0251454
10214	AC016773.1	1-1-9-0-0	8	0.0170134	0.0251454
10980	MRPS18C	1-1-9-0-0	8	0.0170134	0.0251454
15172	AL355802.3	1-1-9-0-0	8	0.0170134	0.0251454
15552	MANEA-DT	1-1-9-0-0	8	0.0170134	0.0251454
22782	COMTD1	1-1-9-0-0	8	0.0170134	0.0251454
23118	CUTC	1-1-9-0-0	8	0.0170134	0.0251454
7872	TGFBR2	1-1-2-0-0	8	0.0693673	0.0989009
10796	UBA6-AS1	1-1-2-0-0	8	0.0693673	0.0989009
12670	CKMT2-AS1	1-1-2-0-0	8	0.0693673	0.0989009
17794	CDHR3	1-1-2-0-0	8	0.0693673	0.0989009
22018	PRKCQ	1-1-2-0-0	8	0.0693673	0.0989009
23238	WBP1L	1-1-2-0-0	8	0.0693673	0.0989009
27122	CSAD	1-1-2-0-0	8	0.0693673	0.0989009
44068	C22orf34	1-1-2-0-0	8	0.0693673	0.0989009
16238	SYTL3	1-98-5-0-0	7	0.049422	0.0602856
18904	AC108449.1	1-98-5-0-0	7	0.049422	0.0602856
24020	ARNTL	1-98-5-0-0	7	0.049422	0.0602856
29132	FBXL3	1-98-5-0-0	7	0.049422	0.0602856
34874	GAS8	1-98-5-0-0	7	0.049422	0.0602856
37984	ZNF24	1-98-5-0-0	7	0.049422	0.0602856
44726	ZXDB	1-98-5-0-0	7	0.049422	0.0602856
326	PGD	1-95-2-0-0	7	0.0322439	0.0669733
2600	ANP32E	1-95-2-0-0	7	0.0322439	0.0669733
9938	BCL6	1-95-2-0-0	7	0.0322439	0.0669733
14708	LY6G5B	1-95-2-0-0	7	0.0322439	0.0669733
33580	ATXN2L	1-95-2-0-0	7	0.0322439	0.0669733
39060	PDE4A	1-95-2-0-0	7	0.0322439	0.0669733
40876	AC010325.1	1-95-2-0-0	7	0.0322439	0.0669733
1242	YBX1	1-95-0-5-0	7	0.0402387	0.0627221
27302	CNPY2	1-95-0-5-0	7	0.0402387	0.0627221
28496	SLC15A4	1-95-0-5-0	7	0.0402387	0.0627221
31154	KLF13	1-95-0-5-0	7	0.0402387	0.0627221
34950	PRPF8	1-95-0-5-0	7	0.0402387	0.0627221
36322	BECN1	1-95-0-5-0	7	0.0402387	0.0627221
43654	EIF3D	1-95-0-5-0	7	0.0402387	0.0627221
5548	AC005041.5	1-83-1-0-0	7	0.0484242	0.0663663
11374	C4orf33	1-83-1-0-0	7	0.0484242	0.0663663
14602	GNL1	1-83-1-0-0	7	0.0484242	0.0663663
24684	STX5	1-83-1-0-0	7	0.0484242	0.0663663
30996	GPR132	1-83-1-0-0	7	0.0484242	0.0663663
36554	AC018521.5	1-83-1-0-0	7	0.0484242	0.0663663
40162	NFKBIB	1-83-1-0-0	7	0.0484242	0.0663663
7565	AC026202.2_flip	1-77-5-0-0	7	0.0341149	0.0521892
19041	ADAM9_flip	1-77-5-0-0	7	0.0341149	0.0521892
19853	AC104316.1_flip	1-77-5-0-0	7	0.0341149	0.0521892
33993	AC092140.1_flip	1-77-5-0-0	7	0.0341149	0.0521892
36881	AC005884.1_flip	1-77-5-0-0	7	0.0341149	0.0521892
38397	PARD6G_flip	1-77-5-0-0	7	0.0341149	0.0521892
43097	PCNT_flip	1-77-5-0-0	7	0.0341149	0.0521892
2334	CSDE1	1-72-8-0-0	7	0.0532126	0.0636807
12814	AC008906.2	1-72-8-0-0	7	0.0532126	0.0636807
24080	LDHA	1-72-8-0-0	7	0.0532126	0.0636807
28208	FBXO21	1-72-8-0-0	7	0.0532126	0.0636807
31406	TMEM87A	1-72-8-0-0	7	0.0532126	0.0636807
34312	UTP4	1-72-8-0-0	7	0.0532126	0.0636807
37768	NAPG	1-72-8-0-0	7	0.0532126	0.0636807
6542	SP3	1-72-3-0-0	7	0.0606845	0
6794	STK17B	1-72-3-0-0	7	0.0606845	0
6880	AC007272.1	1-72-3-0-0	7	0.0606845	0
8620	TMF1	1-72-3-0-0	7	0.0606845	0
11408	ELF2	1-72-3-0-0	7	0.0606845	0
27640	OSBPL8	1-72-3-0-0	7	0.0606845	0
37954	RNF138	1-72-3-0-0	7	0.0606845	0
5356	MEIS1	1-65-2-0-1	7	0.0070494	0.0341192
6782	AC010983.1	1-65-2-0-1	7	0.0070494	0.0341192
16686	KLHL7-DT	1-65-2-0-1	7	0.0070494	0.0341192
24832	AP000944.6	1-65-2-0-1	7	0.0070494	0.0341192
25156	ARAP1-AS1	1-65-2-0-1	7	0.0070494	0.0341192
43202	TBX1	1-65-2-0-1	7	0.0070494	0.0341192
44422	AL592156.2	1-65-2-0-1	7	0.0070494	0.0341192
11238	GAR1	1-58-1-0-0	7	0.0259822	0
15758	TSPYL4	1-58-1-0-0	7	0.0259822	0
29614	NGDN	1-58-1-0-0	7	0.0259822	0
30962	LINC00637	1-58-1-0-0	7	0.0259822	0
35670	KSR1	1-58-1-0-0	7	0.0259822	0
44700	USP51	1-58-1-0-0	7	0.0259822	0
45510	AC006040.1	1-58-1-0-0	7	0.0259822	0
20608	TLN1	1-53-3-0-0	7	0.0519581	0
23874	SMPD1	1-53-3-0-0	7	0.0519581	0
25880	HSPA8	1-53-3-0-0	7	0.0519581	0
39870	AC008747.1	1-53-3-0-0	7	0.0519581	0
40148	ECH1	1-53-3-0-0	7	0.0519581	0
40758	CD37	1-53-3-0-0	7	0.0519581	0
44668	HSD17B10	1-53-3-0-0	7	0.0519581	0
144	RER1	1-53-1-0-0	7	0.0164686	0
6836	SATB2	1-53-1-0-0	7	0.0164686	0
9848	DVL3	1-53-1-0-0	7	0.0164686	0
13492	ADRB2	1-53-1-0-0	7	0.0164686	0
16750	HOTAIRM1	1-53-1-0-0	7	0.0164686	0
34814	ZNF778	1-53-1-0-0	7	0.0164686	0
36158	STARD3	1-53-1-0-0	7	0.0164686	0
12963	AC010226.1_flip	1-5-8-0-0	7	0.00798803	0.0139903
15179	POLH-AS1_flip	1-5-8-0-0	7	0.00798803	0.0139903
24485	BTBD18_flip	1-5-8-0-0	7	0.00798803	0.0139903
29971	NID2_flip	1-5-8-0-0	7	0.00798803	0.0139903
31025	TEDC1_flip	1-5-8-0-0	7	0.00798803	0.0139903
32483	AC018946.1_flip	1-5-8-0-0	7	0.00798803	0.0139903
44021	BX324167.1_flip	1-5-8-0-0	7	0.00798803	0.0139903
6077	DPP10_flip	1-49-0-0-0	7	0.00337962	0.0169333
12237	AC025171.5_flip	1-49-0-0-0	7	0.00337962	0.0169333
12763	AC099501.1_flip	1-49-0-0-0	7	0.00337962	0.0169333
15023	DNAH8_flip	1-49-0-0-0	7	0.00337962	0.0169333
21517	PIP5KL1_flip	1-49-0-0-0	7	0.00337962	0.0169333
26915	CCDC184_flip	1-49-0-0-0	7	0.00337962	0.0169333
27005	GPD1_flip	1-49-0-0-0	7	0.00337962	0.0169333
3714	ATP2B4	1-46-1-0-0	7	0.0523196	0.0570614
7360	DGKD	1-46-1-0-0	7	0.0523196	0.0570614
7362	USP40	1-46-1-0-0	7	0.0523196	0.0570614
7748	EAF1-AS1	1-46-1-0-0	7	0.0523196	0.0570614
20260	DOCK8	1-46-1-0-0	7	0.0523196	0.0570614
22100	FAM107B	1-46-1-0-0	7	0.0523196	0.0570614
25764	KMT2A	1-46-1-0-0	7	0.0523196	0.0570614
1764	TNNI3K	1-46-0-0-0	7	0.0274018	0.060542
11298	SEC24D	1-46-0-0-0	7	0.0274018	0.060542
12900	SLC25A46	1-46-0-0-0	7	0.0274018	0.060542
13742	SPDL1	1-46-0-0-0	7	0.0274018	0.060542
24984	PC	1-46-0-0-0	7	0.0274018	0.060542
36968	PECAM1	1-46-0-0-0	7	0.0274018	0.060542
37044	AC005332.2	1-46-0-0-0	7	0.0274018	0.060542
760	GPATCH3	1-39-0-1-0	7	0.0373245	0.0308386
11774	CLDN22	1-39-0-1-0	7	0.0373245	0.0308386
12060	LINC02211	1-39-0-1-0	7	0.0373245	0.0308386
26342	LINC00987	1-39-0-1-0	7	0.0373245	0.0308386
33156	C16orf72	1-39-0-1-0	7	0.0373245	0.0308386
33716	ZNF771	1-39-0-1-0	7	0.0373245	0.0308386
40950	ZNF432	1-39-0-1-0	7	0.0373245	0.0308386
2642	SETDB1	1-37-3-0-0	7	0.0169962	0
15794	AL137009.1	1-37-3-0-0	7	0.0169962	0
17636	AGFG2	1-37-3-0-0	7	0.0169962	0
23590	LRRC27	1-37-3-0-0	7	0.0169962	0
29912	L2HGDH	1-37-3-0-0	7	0.0169962	0
30474	MLH3	1-37-3-0-0	7	0.0169962	0
31586	FAM227B	1-37-3-0-0	7	0.0169962	0
2031	DPYD-AS1_flip	1-332-0-0-0	7	0.0435082	0.0679082
2051	AC093019.2_flip	1-332-0-0-0	7	0.0435082	0.0679082
11557	AC023424.3_flip	1-332-0-0-0	7	0.0435082	0.0679082
12593	AC025188.1_flip	1-332-0-0-0	7	0.0435082	0.0679082
29135	MYCBP2-AS1_flip	1-332-0-0-0	7	0.0435082	0.0679082
36917	AC015923.1_flip	1-332-0-0-0	7	0.0435082	0.0679082
40519	GIPR_flip	1-332-0-0-0	7	0.0435082	0.0679082
2030	DPYD-AS1	1-323-0-0-0	7	0.0435082	0.0679082
2050	AC093019.2	1-323-0-0-0	7	0.0435082	0.0679082
11556	AC023424.3	1-323-0-0-0	7	0.0435082	0.0679082
12592	AC025188.1	1-323-0-0-0	7	0.0435082	0.0679082
29134	MYCBP2-AS1	1-323-0-0-0	7	0.0435082	0.0679082
36916	AC015923.1	1-323-0-0-0	7	0.0435082	0.0679082
40518	GIPR	1-323-0-0-0	7	0.0435082	0.0679082
5488	AC074008.2	1-285-0-0-0	7	0.00525548	0.00940189
14240	Z93020.1	1-285-0-0-0	7	0.00525548	0.00940189
15218	AL133334.1	1-285-0-0-0	7	0.00525548	0.00940189
18650	AC069185.1	1-285-0-0-0	7	0.00525548	0.00940189
24470	AP000662.1	1-285-0-0-0	7	0.00525548	0.00940189
37090	LINC00511	1-285-0-0-0	7	0.00525548	0.00940189
43868	AL035681.1	1-285-0-0-0	7	0.00525548	0.00940189
6244	SPOPL	1-280-1-0-0	7	0.033791	0
7042	SPAG16	1-280-1-0-0	7	0.033791	0
10430	TAPT1-AS1	1-280-1-0-0	7	0.033791	0
11110	LAMTOR3	1-280-1-0-0	7	0.033791	0
11322	EXOSC9	1-280-1-0-0	7	0.033791	0
25416	CHORDC1	1-280-1-0-0	7	0.033791	0
44948	CENPI	1-280-1-0-0	7	0.033791	0
4912	MEMO1	1-28-2-0-0	7	0.0371905	0.0786271
7874	AC096921.2	1-28-2-0-0	7	0.0371905	0.0786271
10482	ZCCHC4	1-28-2-0-0	7	0.0371905	0.0786271
10830	ANKRD17	1-28-2-0-0	7	0.0371905	0.0786271
16184	TIAM2	1-28-2-0-0	7	0.0371905	0.0786271
17458	AC000065.2	1-28-2-0-0	7	0.0371905	0.0786271
29722	STXBP6	1-28-2-0-0	7	0.0371905	0.0786271
3356	CENPL	1-27-5-0-0	7	0.0448461	0.0473609
6888	CASP8	1-27-5-0-0	7	0.0448461	0.0473609
16206	TMEM242	1-27-5-0-0	7	0.0448461	0.0473609
17020	DBNL	1-27-5-0-0	7	0.0448461	0.0473609
20982	FGD3	1-27-5-0-0	7	0.0448461	0.0473609
32320	AC022558.2	1-27-5-0-0	7	0.0448461	0.0473609
36958	ICAM2	1-27-5-0-0	7	0.0448461	0.0473609
1804	FUBP1	1-27-1-0-0	7	0.0224784	0.0562114
3318	FMO4	1-27-1-0-0	7	0.0224784	0.0562114
5702	PLGLB2	1-27-1-0-0	7	0.0224784	0.0562114
6028	POLR1B	1-27-1-0-0	7	0.0224784	0.0562114
35566	FOXO3B	1-27-1-0-0	7	0.0224784	0.0562114
40044	ZNF850	1-27-1-0-0	7	0.0224784	0.0562114
44284	FANCB	1-27-1-0-0	7	0.0224784	0.0562114
10182	IDUA	1-25-2-0-1	7	0.0401876	0.0357699
21288	RGS3	1-25-2-0-1	7	0.0401876	0.0357699
36106	MLLT6	1-25-2-0-1	7	0.0401876	0.0357699
37504	PCYT2	1-25-2-0-1	7	0.0401876	0.0357699
39056	TYK2	1-25-2-0-1	7	0.0401876	0.0357699
40714	BCAT2	1-25-2-0-1	7	0.0401876	0.0357699
43220	DGCR8	1-25-2-0-1	7	0.0401876	0.0357699
20484	DDX58	1-25-1-1-0	7	0.0355424	0.0475892
21266	FKBP15	1-25-1-1-0	7	0.0355424	0.0475892
30438	ALDH6A1	1-25-1-1-0	7	0.0355424	0.0475892
32366	ZNF592	1-25-1-1-0	7	0.0355424	0.0475892
32480	IQGAP1	1-25-1-1-0	7	0.0355424	0.0475892
35054	ANKFY1	1-25-1-1-0	7	0.0355424	0.0475892
43500	ASCC2	1-25-1-1-0	7	0.0355424	0.0475892
6036	SLC20A1	1-25-0-3-0	7	0.0512088	0.0530119
9066	PARP15	1-25-0-3-0	7	0.0512088	0.0530119
22328	AL365203.2	1-25-0-3-0	7	0.0512088	0.0530119
23806	CARS	1-25-0-3-0	7	0.0512088	0.0530119
28320	RNF34	1-25-0-3-0	7	0.0512088	0.0530119
36972	POLG2	1-25-0-3-0	7	0.0512088	0.0530119
37052	ARSG	1-25-0-3-0	7	0.0512088	0.0530119
2160	ATXN7L2	1-23-1-0-0	7	0.0636655	0.0559388
2460	AC245014.3	1-23-1-0-0	7	0.0636655	0.0559388
4890	AC016907.2	1-23-1-0-0	7	0.0636655	0.0559388
6280	AC009951.6	1-23-1-0-0	7	0.0636655	0.0559388
13240	FAM53C	1-23-1-0-0	7	0.0636655	0.0559388
17774	KMT2E-AS1	1-23-1-0-0	7	0.0636655	0.0559388
40830	ATF5	1-23-1-0-0	7	0.0636655	0.0559388
9461	AC117386.2_flip	1-217-2-0-0	7	0.00567551	0.0123135
9955	LPP-AS1_flip	1-217-2-0-0	7	0.00567551	0.0123135
23291	GSTO2_flip	1-217-2-0-0	7	0.00567551	0.0123135
24455	PRG2_flip	1-217-2-0-0	7	0.00567551	0.0123135
28525	MMP17_flip	1-217-2-0-0	7	0.00567551	0.0123135
29949	LINC00640_flip	1-217-2-0-0	7	0.00567551	0.0123135
30349	AC004825.3_flip	1-217-2-0-0	7	0.00567551	0.0123135
19986	LRRC6	1-213-0-0-0	7	0.0317057	0.0528469
25852	GRIK4	1-213-0-0-0	7	0.0317057	0.0528469
26664	AC092747.4	1-213-0-0-0	7	0.0317057	0.0528469
27926	HCFC2	1-213-0-0-0	7	0.0317057	0.0528469
35488	CCDC144A	1-213-0-0-0	7	0.0317057	0.0528469
41118	KIR3DL3	1-213-0-0-0	7	0.0317057	0.0528469
43440	LINC01422	1-213-0-0-0	7	0.0317057	0.0528469
12230	AC008875.1	1-206-2-0-0	7	0.0260642	0.0204059
13598	LINC01470	1-206-2-0-0	7	0.0260642	0.0204059
16980	AC072061.1	1-206-2-0-0	7	0.0260642	0.0204059
21526	NAIF1	1-206-2-0-0	7	0.0260642	0.0204059
26716	AC010198.2	1-206-2-0-0	7	0.0260642	0.0204059
31606	GABPB1-AS1	1-206-2-0-0	7	0.0260642	0.0204059
37426	AC127496.5	1-206-2-0-0	7	0.0260642	0.0204059
872	PUM1	1-20-2-0-0	7	0.0292499	0
6442	TTC21B	1-20-2-0-0	7	0.0292499	0
23490	IKZF5	1-20-2-0-0	7	0.0292499	0
27760	UBE2N	1-20-2-0-0	7	0.0292499	0
32654	TM2D3	1-20-2-0-0	7	0.0292499	0
36846	VMP1	1-20-2-0-0	7	0.0292499	0
37008	HELZ	1-20-2-0-0	7	0.0292499	0
11504	SLC10A7	1-2-3-0-0	7	0.0388595	0.0592283
15220	SUPT3H	1-2-3-0-0	7	0.0388595	0.0592283
16962	VPS41	1-2-3-0-0	7	0.0388595	0.0592283
25514	DCUN1D5	1-2-3-0-0	7	0.0388595	0.0592283
29046	VPS36	1-2-3-0-0	7	0.0388595	0.0592283
36506	NSF	1-2-3-0-0	7	0.0388595	0.0592283
44464	CASK	1-2-3-0-0	7	0.0388595	0.0592283
2716	TDRKH-AS1	1-197-0-0-0	7	0.0164527	0
5716	AC062029.1	1-197-0-0-0	7	0.0164527	0
11266	AC023886.1	1-197-0-0-0	7	0.0164527	0
20992	WNK2	1-197-0-0-0	7	0.0164527	0
29184	MIR17HG	1-197-0-0-0	7	0.0164527	0
42704	AP001605.1	1-197-0-0-0	7	0.0164527	0
43936	RRP7A	1-197-0-0-0	7	0.0164527	0
12220	SELENOP	1-192-1-0-0	7	0.0214734	0.0588747
15530	ANKRD6	1-192-1-0-0	7	0.0214734	0.0588747
19804	SAMD12-AS1	1-192-1-0-0	7	0.0214734	0.0588747
22444	PTPN20	1-192-1-0-0	7	0.0214734	0.0588747
22530	ANK3	1-192-1-0-0	7	0.0214734	0.0588747
25980	LINC02098	1-192-1-0-0	7	0.0214734	0.0588747
32068	LOXL1-AS1	1-192-1-0-0	7	0.0214734	0.0588747
4010	MIA3	1-180-1-0-0	7	0.0108603	0.0445843
6434	CSRNP3	1-180-1-0-0	7	0.0108603	0.0445843
19080	PLAT	1-180-1-0-0	7	0.0108603	0.0445843
29818	AL392023.2	1-180-1-0-0	7	0.0108603	0.0445843
31600	HDC	1-180-1-0-0	7	0.0108603	0.0445843
39370	AC003956.1	1-180-1-0-0	7	0.0108603	0.0445843
40836	AC010624.3	1-180-1-0-0	7	0.0108603	0.0445843
1850	SSX2IP	1-18-4-0-0	7	0.0394762	0.0787065
12264	PAIP1	1-18-4-0-0	7	0.0394762	0.0787065
13026	SNX2	1-18-4-0-0	7	0.0394762	0.0787065
13032	CSNK1G3	1-18-4-0-0	7	0.0394762	0.0787065
19502	NBN	1-18-4-0-0	7	0.0394762	0.0787065
25912	AP000866.6	1-18-4-0-0	7	0.0394762	0.0787065
41692	POLR3F	1-18-4-0-0	7	0.0394762	0.0787065
337	AL139423.2_flip	1-177-4-0-0	7	0.00539341	0
810	SMPDL3B	1-177-4-0-0	7	0.00539341	0
8738	AC110491.3	1-177-4-0-0	7	0.00539341	0
13206	AC026691.1	1-177-4-0-0	7	0.00539341	0
22167	AC069542.1_flip	1-177-4-0-0	7	0.00539341	0
40732	DHDH	1-177-4-0-0	7	0.00539341	0
41383	A1BG_flip	1-177-4-0-0	7	0.00539341	0
1724	WLS	1-177-2-0-0	7	0.00129121	0.00179187
4238	SLC35F3	1-177-2-0-0	7	0.00129121	0.00179187
[truncated: 2,860 more rows]

## Sheet: filtered_Naïve_CD8+_T_cells
	gene	clustering results	the numbers of genes	The cohesion of the last layer	The separation of the last layer
820	AL445248.1	1-275-0-0-0	30	0.0424878	0.049141
2766	KLHDC9	1-275-0-0-0	30	0.0424878	0.049141
3160	AL136987.1	1-275-0-0-0	30	0.0424878	0.049141
3308	AL606489.1	1-275-0-0-0	30	0.0424878	0.049141
4096	E2F6	1-275-0-0-0	30	0.0424878	0.049141
4346	LBH	1-275-0-0-0	30	0.0424878	0.049141
6090	AC007163.1	1-275-0-0-0	30	0.0424878	0.049141
8390	SERP1	1-275-0-0-0	30	0.0424878	0.049141
8730	POLR2H	1-275-0-0-0	30	0.0424878	0.049141
9684	THAP9-AS1	1-275-0-0-0	30	0.0424878	0.049141
10270	FNIP2	1-275-0-0-0	30	0.0424878	0.049141
11348	FER	1-275-0-0-0	30	0.0424878	0.049141
12818	TRIM26	1-275-0-0-0	30	0.0424878	0.049141
15596	POLR2J2	1-275-0-0-0	30	0.0424878	0.049141
17446	FAM91A1	1-275-0-0-0	30	0.0424878	0.049141
17706	MAF1	1-275-0-0-0	30	0.0424878	0.049141
19234	ARRDC1-AS1	1-275-0-0-0	30	0.0424878	0.049141
21100	NCR3LG1	1-275-0-0-0	30	0.0424878	0.049141
23124	AC006581.1	1-275-0-0-0	30	0.0424878	0.049141
24706	SH2B3	1-275-0-0-0	30	0.0424878	0.049141
25994	HAUS4	1-275-0-0-0	30	0.0424878	0.049141
26842	TGFB3	1-275-0-0-0	30	0.0424878	0.049141
29098	AC007220.2	1-275-0-0-0	30	0.0424878	0.049141
29902	KATNB1	1-275-0-0-0	30	0.0424878	0.049141
30738	SPNS3	1-275-0-0-0	30	0.0424878	0.049141
33658	PTBP1	1-275-0-0-0	30	0.0424878	0.049141
34550	AC008764.2	1-275-0-0-0	30	0.0424878	0.049141
35114	ZNF570	1-275-0-0-0	30	0.0424878	0.049141
38806	AP1S2	1-275-0-0-0	30	0.0424878	0.049141
39448	LINC00630	1-275-0-0-0	30	0.0424878	0.049141
2080	NRAS	1-73-0-0-0	25	0.0519574	0.0690415
2122	TENT5C	1-73-0-0-0	25	0.0519574	0.0690415
2642	GPATCH4	1-73-0-0-0	25	0.0519574	0.0690415
3802	ERO1B	1-73-0-0-0	25	0.0519574	0.0690415
4442	ATL2	1-73-0-0-0	25	0.0519574	0.0690415
7552	SELENOK	1-73-0-0-0	25	0.0519574	0.0690415
7670	TMF1	1-73-0-0-0	25	0.0519574	0.0690415
8876	UBXN7	1-73-0-0-0	25	0.0519574	0.0690415
10482	EXOC3	1-73-0-0-0	25	0.0519574	0.0690415
14538	USP42	1-73-0-0-0	25	0.0519574	0.0690415
15780	NDUFA5	1-73-0-0-0	25	0.0519574	0.0690415
19256	IDI1	1-73-0-0-0	25	0.0519574	0.0690415
19518	MASTL	1-73-0-0-0	25	0.0519574	0.0690415
19644	HNRNPF	1-73-0-0-0	25	0.0519574	0.0690415
21072	RRAS2	1-73-0-0-0	25	0.0519574	0.0690415
22754	CHEK1	1-73-0-0-0	25	0.0519574	0.0690415
25612	FBXL3	1-73-0-0-0	25	0.0519574	0.0690415
26272	DNAAF2	1-73-0-0-0	25	0.0519574	0.0690415
27634	MAP1A	1-73-0-0-0	25	0.0519574	0.0690415
30388	AC040169.1	1-73-0-0-0	25	0.0519574	0.0690415
31502	ZNF830	1-73-0-0-0	25	0.0519574	0.0690415
32612	SAP30BP	1-73-0-0-0	25	0.0519574	0.0690415
33894	YJU2	1-73-0-0-0	25	0.0519574	0.0690415
38454	SNU13	1-73-0-0-0	25	0.0519574	0.0690415
39340	PGK1	1-73-0-0-0	25	0.0519574	0.0690415
686	NUDC	1-94-0-0-0	21	0.0632093	0.074613
2508	ADAR	1-94-0-0-0	21	0.0632093	0.074613
3364	RASSF5	1-94-0-0-0	21	0.0632093	0.074613
6564	LRRFIP1	1-94-0-0-0	21	0.0632093	0.074613
6682	CRBN	1-94-0-0-0	21	0.0632093	0.074613
9316	KLF3	1-94-0-0-0	21	0.0632093	0.074613
9328	KLHL5	1-94-0-0-0	21	0.0632093	0.074613
15268	TMEM243	1-94-0-0-0	21	0.0632093	0.074613
16450	LONRF1	1-94-0-0-0	21	0.0632093	0.074613
17202	VIRMA	1-94-0-0-0	21	0.0632093	0.074613
19692	MAPK8	1-94-0-0-0	21	0.0632093	0.074613
20454	PDCD4	1-94-0-0-0	21	0.0632093	0.074613
20504	ABLIM1	1-94-0-0-0	21	0.0632093	0.074613
24924	SETD1B	1-94-0-0-0	21	0.0632093	0.074613
25794	ARHGEF7	1-94-0-0-0	21	0.0632093	0.074613
26758	ZNF410	1-94-0-0-0	21	0.0632093	0.074613
29790	CYLD	1-94-0-0-0	21	0.0632093	0.074613
31780	STAT3	1-94-0-0-0	21	0.0632093	0.074613
32434	GNA13	1-94-0-0-0	21	0.0632093	0.074613
34466	TECR	1-94-0-0-0	21	0.0632093	0.074613
36836	PPP1R16B	1-94-0-0-0	21	0.0632093	0.074613
1377	TMEM59_flip	1-181-0-0-0	21	0.0449667	0.0623212
2365	CDC42SE1_flip	1-181-0-0-0	21	0.0449667	0.0623212
4285	SNX17_flip	1-181-0-0-0	21	0.0449667	0.0623212
9101	MAN2B2_flip	1-181-0-0-0	21	0.0449667	0.0623212
9437	OCIAD2_flip	1-181-0-0-0	21	0.0449667	0.0623212
9891	AIMP1_flip	1-181-0-0-0	21	0.0449667	0.0623212
14309	TAGAP_flip	1-181-0-0-0	21	0.0449667	0.0623212
16885	TGS1_flip	1-181-0-0-0	21	0.0449667	0.0623212
18889	CIZ1_flip	1-181-0-0-0	21	0.0449667	0.0623212
21485	STX3_flip	1-181-0-0-0	21	0.0449667	0.0623212
22377	DCUN1D5_flip	1-181-0-0-0	21	0.0449667	0.0623212
22417	AP003307.1_flip	1-181-0-0-0	21	0.0449667	0.0623212
23833	ITGB7_flip	1-181-0-0-0	21	0.0449667	0.0623212
28999	NMRAL1_flip	1-181-0-0-0	21	0.0449667	0.0623212
29479	LAT_flip	1-181-0-0-0	21	0.0449667	0.0623212
30759	PSMB6_flip	1-181-0-0-0	21	0.0449667	0.0623212
32301	CLTC_flip	1-181-0-0-0	21	0.0449667	0.0623212
33929	MYDGF_flip	1-181-0-0-0	21	0.0449667	0.0623212
34913	PDCD2L_flip	1-181-0-0-0	21	0.0449667	0.0623212
38801	CA5B_flip	1-181-0-0-0	21	0.0449667	0.0623212
39393	CSTF2_flip	1-181-0-0-0	21	0.0449667	0.0623212
1376	TMEM59	1-178-0-0-0	21	0.0449667	0.0623212
2364	CDC42SE1	1-178-0-0-0	21	0.0449667	0.0623212
4284	SNX17	1-178-0-0-0	21	0.0449667	0.0623212
9100	MAN2B2	1-178-0-0-0	21	0.0449667	0.0623212
9436	OCIAD2	1-178-0-0-0	21	0.0449667	0.0623212
9890	AIMP1	1-178-0-0-0	21	0.0449667	0.0623212
14308	TAGAP	1-178-0-0-0	21	0.0449667	0.0623212
16884	TGS1	1-178-0-0-0	21	0.0449667	0.0623212
18888	CIZ1	1-178-0-0-0	21	0.0449667	0.0623212
21484	STX3	1-178-0-0-0	21	0.0449667	0.0623212
22376	DCUN1D5	1-178-0-0-0	21	0.0449667	0.0623212
22416	AP003307.1	1-178-0-0-0	21	0.0449667	0.0623212
23832	ITGB7	1-178-0-0-0	21	0.0449667	0.0623212
28998	NMRAL1	1-178-0-0-0	21	0.0449667	0.0623212
29478	LAT	1-178-0-0-0	21	0.0449667	0.0623212
30758	PSMB6	1-178-0-0-0	21	0.0449667	0.0623212
32300	CLTC	1-178-0-0-0	21	0.0449667	0.0623212
33928	MYDGF	1-178-0-0-0	21	0.0449667	0.0623212
34912	PDCD2L	1-178-0-0-0	21	0.0449667	0.0623212
38800	CA5B	1-178-0-0-0	21	0.0449667	0.0623212
39392	CSTF2	1-178-0-0-0	21	0.0449667	0.0623212
6290	RPL37A	1-11-0-0-0	20	0.126902	0.165942
6570	RAMP1	1-11-0-0-0	20	0.126902	0.165942
9340	RPL9	1-11-0-0-0	20	0.126902	0.165942
10196	RPS3A	1-11-0-0-0	20	0.126902	0.165942
14006	RPS12	1-11-0-0-0	20	0.126902	0.165942
14516	ACTB	1-11-0-0-0	20	0.126902	0.165942
16888	RPS20	1-11-0-0-0	20	0.126902	0.165942
17764	RPL8	1-11-0-0-0	20	0.126902	0.165942
21092	RPS13	1-11-0-0-0	20	0.126902	0.165942
22122	RPS3	1-11-0-0-0	20	0.126902	0.165942
23952	RPS26	1-11-0-0-0	20	0.126902	0.165942
24016	NACA	1-11-0-0-0	20	0.126902	0.165942
25222	RPL21	1-11-0-0-0	20	0.126902	0.165942
25410	TPT1	1-11-0-0-0	20	0.126902	0.165942
32860	ALYREF	1-11-0-0-0	20	0.126902	0.165942
35718	RPL13A	1-11-0-0-0	20	0.126902	0.165942
36094	ZNF581	1-11-0-0-0	20	0.126902	0.165942
36750	ERGIC3	1-11-0-0-0	20	0.126902	0.165942
39038	RBM3	1-11-0-0-0	20	0.126902	0.165942
39838	RPL10	1-11-0-0-0	20	0.126902	0.165942
254	GPR157	1-22-0-0-0	19	0.0519893	0.0723467
3564	NVL	1-22-0-0-0	19	0.0519893	0.0723467
3686	CCSAP	1-22-0-0-0	19	0.0519893	0.0723467
4226	HADHA	1-22-0-0-0	19	0.0519893	0.0723467
5152	ANKRD36B	1-22-0-0-0	19	0.0519893	0.0723467
8084	OSBPL11	1-22-0-0-0	19	0.0519893	0.0723467
16922	AC022182.1	1-22-0-0-0	19	0.0519893	0.0723467
18748	MRRF	1-22-0-0-0	19	0.0519893	0.0723467
19028	POMT1	1-22-0-0-0	19	0.0519893	0.0723467
20026	ANXA11	1-22-0-0-0	19	0.0519893	0.0723467
22464	DIXDC1	1-22-0-0-0	19	0.0519893	0.0723467
23908	TESPA1	1-22-0-0-0	19	0.0519893	0.0723467
24218	CPSF6	1-22-0-0-0	19	0.0519893	0.0723467
26226	TRAPPC6B	1-22-0-0-0	19	0.0519893	0.0723467
26948	TTC8	1-22-0-0-0	19	0.0519893	0.0723467
27758	GABPB1-AS1	1-22-0-0-0	19	0.0519893	0.0723467
29930	CNOT1	1-22-0-0-0	19	0.0519893	0.0723467
30566	ZNF276	1-22-0-0-0	19	0.0519893	0.0723467
31472	ZNF207	1-22-0-0-0	19	0.0519893	0.0723467
508	USP48	1-0-0-0-0	19	0.0534031	0.091197
1858	AC093157.1	1-0-0-0-0	19	0.0534031	0.091197
8952	ZNF141	1-0-0-0-0	19	0.0534031	0.091197
13748	RTN4IP1	1-0-0-0-0	19	0.0534031	0.091197
14156	SHPRH	1-0-0-0-0	19	0.0534031	0.091197
18770	STRBP	1-0-0-0-0	19	0.0534031	0.091197
19002	FUBP3	1-0-0-0-0	19	0.0534031	0.091197
20896	STIM1	1-0-0-0-0	19	0.0534031	0.091197
22056	FCHSD2	1-0-0-0-0	19	0.0534031	0.091197
27448	DPH6	1-0-0-0-0	19	0.0534031	0.091197
27886	ADAM10	1-0-0-0-0	19	0.0534031	0.091197
28610	LRRC28	1-0-0-0-0	19	0.0534031	0.091197
31080	PIGL	1-0-0-0-0	19	0.0534031	0.091197
32176	MBTD1	1-0-0-0-0	19	0.0534031	0.091197
33188	TTC39C	1-0-0-0-0	19	0.0534031	0.091197
33374	DYM	1-0-0-0-0	19	0.0534031	0.091197
33472	RELCH	1-0-0-0-0	19	0.0534031	0.091197
36404	ATRN	1-0-0-0-0	19	0.0534031	0.091197
39920	PRKY	1-0-0-0-0	19	0.0534031	0.091197
208	KLHL21	1-21-0-0-0	18	0.046286	0.0558081
4320	AC104695.4	1-21-0-0-0	18	0.046286	0.0558081
11888	CSNK1A1	1-21-0-0-0	18	0.046286	0.0558081
13986	ARG1	1-21-0-0-0	18	0.046286	0.0558081
14490	GNA12	1-21-0-0-0	18	0.046286	0.0558081
15478	STAG3	1-21-0-0-0	18	0.046286	0.0558081
19024	PRRC2B	1-21-0-0-0	18	0.046286	0.0558081
21030	CTR9	1-21-0-0-0	18	0.046286	0.0558081
23730	CERS5	1-21-0-0-0	18	0.046286	0.0558081
24442	METAP2	1-21-0-0-0	18	0.046286	0.0558081
25048	AACS	1-21-0-0-0	18	0.046286	0.0558081
25682	IPO5	1-21-0-0-0	18	0.046286	0.0558081
27894	SLTM	1-21-0-0-0	18	0.046286	0.0558081
30866	DVL2	1-21-0-0-0	18	0.046286	0.0558081
31316	SDF2	1-21-0-0-0	18	0.046286	0.0558081
34332	ZNF490	1-21-0-0-0	18	0.046286	0.0558081
35286	SNRPA	1-21-0-0-0	18	0.046286	0.0558081
37904	PPIL2	1-21-0-0-0	18	0.046286	0.0558081
562	RPL11	1-17-1-0-0	18	0.139168	0.19545
10978	MRPS36	1-17-1-0-0	18	0.139168	0.19545
13066	RPS18	1-17-1-0-0	18	0.139168	0.19545
13116	RPS10	1-17-1-0-0	18	0.139168	0.19545
13266	TOMM6	1-17-1-0-0	18	0.139168	0.19545
19166	PHPT1	1-17-1-0-0	18	0.139168	0.19545
21744	FAU	1-17-1-0-0	18	0.139168	0.19545
28512	CIB1	1-17-1-0-0	18	0.139168	0.19545
30438	COX4I1	1-17-1-0-0	18	0.139168	0.19545
30776	PFN1	1-17-1-0-0	18	0.139168	0.19545
31326	RPL23A	1-17-1-0-0	18	0.139168	0.19545
34736	NDUFA13	1-17-1-0-0	18	0.139168	0.19545
35012	HCST	1-17-1-0-0	18	0.139168	0.19545
35016	LRFN3	1-17-1-0-0	18	0.139168	0.19545
35168	EIF3K	1-17-1-0-0	18	0.139168	0.19545
35720	RPS11	1-17-1-0-0	18	0.139168	0.19545
38770	TMSB4X	1-17-1-0-0	18	0.139168	0.19545
39408	RPL36A	1-17-1-0-0	18	0.139168	0.19545
3118	EDEM3	1-14-0-0-0	18	0.0727128	0.0971444
10598	RETREG1	1-14-0-0-0	18	0.0727128	0.0971444
10824	NDUFS4	1-14-0-0-0	18	0.0727128	0.0971444
11502	LINC01184	1-14-0-0-0	18	0.0727128	0.0971444
13690	MAP3K7	1-14-0-0-0	18	0.0727128	0.0971444
14238	IPCEF1	1-14-0-0-0	18	0.0727128	0.0971444
18288	GNAQ	1-14-0-0-0	18	0.0727128	0.0971444
18526	TGFBR1	1-14-0-0-0	18	0.0727128	0.0971444
19480	PIP4K2A	1-14-0-0-0	18	0.0727128	0.0971444
20436	ADD3	1-14-0-0-0	18	0.0727128	0.0971444
21184	METTL15	1-14-0-0-0	18	0.0727128	0.0971444
25558	TDRD3	1-14-0-0-0	18	0.0727128	0.0971444
25626	RBM26	1-14-0-0-0	18	0.0727128	0.0971444
27426	SLC12A6	1-14-0-0-0	18	0.0727128	0.0971444
28620	AC090825.1	1-14-0-0-0	18	0.0727128	0.0971444
31616	SYNRG	1-14-0-0-0	18	0.0727128	0.0971444
33300	KIAA1328	1-14-0-0-0	18	0.0727128	0.0971444
33362	SMAD2	1-14-0-0-0	18	0.0727128	0.0971444
5076	MAL	1-8-4-0-0	17	0.0618352	0.0510593
6552	IQCA1	1-8-4-0-0	17	0.0618352	0.0510593
7644	PSMD6-AS1	1-8-4-0-0	17	0.0618352	0.0510593
9074	TMEM128	1-8-4-0-0	17	0.0618352	0.0510593
11926	ANXA6	1-8-4-0-0	17	0.0618352	0.0510593
12096	FBXW11	1-8-4-0-0	17	0.0618352	0.0510593
15082	LINC00174	1-8-4-0-0	17	0.0618352	0.0510593
18452	ERCC6L2	1-8-4-0-0	17	0.0618352	0.0510593
19354	UPF2	1-8-4-0-0	17	0.0618352	0.0510593
19954	FUT11	1-8-4-0-0	17	0.0618352	0.0510593
20610	EEF1AKMT2	1-8-4-0-0	17	0.0618352	0.0510593
25688	STK24	1-8-4-0-0	17	0.0618352	0.0510593
27596	CAPN3	1-8-4-0-0	17	0.0618352	0.0510593
31770	STAT5B	1-8-4-0-0	17	0.0618352	0.0510593
37608	PDE9A	1-8-4-0-0	17	0.0618352	0.0510593
37978	SPECC1L	1-8-4-0-0	17	0.0618352	0.0510593
38266	SH3BP1	1-8-4-0-0	17	0.0618352	0.0510593
7802	PCNP	1-48-0-0-0	17	0.0601738	0.100211
13700	UFL1	1-48-0-0-0	17	0.0601738	0.100211
13988	MED23	1-48-0-0-0	17	0.0601738	0.100211
15674	DUS4L	1-48-0-0-0	17	0.0601738	0.100211
16664	LEPROTL1	1-48-0-0-0	17	0.0601738	0.100211
18488	TSTD2	1-48-0-0-0	17	0.0601738	0.100211
19678	TIMM23	1-48-0-0-0	17	0.0601738	0.100211
20328	OGA	1-48-0-0-0	17	0.0601738	0.100211
21212	EIF3M	1-48-0-0-0	17	0.0601738	0.100211
25150	XPO4	1-48-0-0-0	17	0.0601738	0.100211
27960	HERC1	1-48-0-0-0	17	0.0601738	0.100211
28652	SNRPA1	1-48-0-0-0	17	0.0601738	0.100211
30384	MBTPS1	1-48-0-0-0	17	0.0601738	0.100211
33290	ELP2	1-48-0-0-0	17	0.0601738	0.100211
33604	TXNL4A	1-48-0-0-0	17	0.0601738	0.100211
38324	TOMM22	1-48-0-0-0	17	0.0601738	0.100211
38704	P2RY8	1-48-0-0-0	17	0.0601738	0.100211
5036	RMND5A	1-12-0-0-0	17	0.0624941	0.0656855
5408	CLASP1	1-12-0-0-0	17	0.0624941	0.0656855
6282	XRCC5	1-12-0-0-0	17	0.0624941	0.0656855
8144	RAB43	1-12-0-0-0	17	0.0624941	0.0656855
9752	HERC3	1-12-0-0-0	17	0.0624941	0.0656855
14252	AL589693.1	1-12-0-0-0	17	0.0624941	0.0656855
17800	SMARCA2	1-12-0-0-0	17	0.0624941	0.0656855
17864	KIAA2026	1-12-0-0-0	17	0.0624941	0.0656855
18774	DENND1A	1-12-0-0-0	17	0.0624941	0.0656855
19148	AGPAT2	1-12-0-0-0	17	0.0624941	0.0656855
23604	AC008083.2	1-12-0-0-0	17	0.0624941	0.0656855
24486	IKBIP	1-12-0-0-0	17	0.0624941	0.0656855
28014	DPP8	1-12-0-0-0	17	0.0624941	0.0656855
30264	CFDP1	1-12-0-0-0	17	0.0624941	0.0656855
31344	FLOT2	1-12-0-0-0	17	0.0624941	0.0656855
36306	SOX12	1-12-0-0-0	17	0.0624941	0.0656855
39220	MTMR8	1-12-0-0-0	17	0.0624941	0.0656855
452	UBR4	1-226-0-0-0	16	0.0607609	0.061479
602	RUNX3	1-226-0-0-0	16	0.0607609	0.061479
4334	WDR43	1-226-0-0-0	16	0.0607609	0.061479
5028	KDM3A	1-226-0-0-0	16	0.0607609	0.061479
11914	DCTN4	1-226-0-0-0	16	0.0607609	0.061479
13300	RPL7L1	1-226-0-0-0	16	0.0607609	0.061479
14216	ZBTB2	1-226-0-0-0	16	0.0607609	0.061479
15548	ZNHIT1	1-226-0-0-0	16	0.0607609	0.061479
16866	RB1CC1	1-226-0-0-0	16	0.0607609	0.061479
18978	NTMT1	1-226-0-0-0	16	0.0607609	0.061479
25456	MED4	1-226-0-0-0	16	0.0607609	0.061479
29174	PDXDC1	1-226-0-0-0	16	0.0607609	0.061479
30780	SPAG7	1-226-0-0-0	16	0.0607609	0.061479
34518	FAM32A	1-226-0-0-0	16	0.0607609	0.061479
35302	HNRNPUL1	1-226-0-0-0	16	0.0607609	0.061479
38940	MED14	1-226-0-0-0	16	0.0607609	0.061479
4468	MAP4K3	1-0-3-0-0	16	0.0757578	0.0906129
5504	R3HDM1	1-0-3-0-0	16	0.0757578	0.0906129
6160	ABI2	1-0-3-0-0	16	0.0757578	0.0906129
8214	DNAJC13	1-0-3-0-0	16	0.0757578	0.0906129
9424	TXK	1-0-3-0-0	16	0.0757578	0.0906129
11152	RASGRF2	1-0-3-0-0	16	0.0757578	0.0906129
13642	SLC35A1	1-0-3-0-0	16	0.0757578	0.0906129
16408	XKR6	1-0-3-0-0	16	0.0757578	0.0906129
17128	WWP1	1-0-3-0-0	16	0.0757578	0.0906129
25768	TNFSF13B	1-0-3-0-0	16	0.0757578	0.0906129
26612	TMEM229B	1-0-3-0-0	16	0.0757578	0.0906129
28616	MEF2A	1-0-3-0-0	16	0.0757578	0.0906129
36528	DTD1	1-0-3-0-0	16	0.0757578	0.0906129
36980	NCOA3	1-0-3-0-0	16	0.0757578	0.0906129
38854	RPS6KA3	1-0-3-0-0	16	0.0757578	0.0906129
39774	MTM1	1-0-3-0-0	16	0.0757578	0.0906129
3766	IRF2BP2	1-67-1-0-0	15	0.0922617	0
4880	DUSP11	1-67-1-0-0	15	0.0922617	0
6790	BRK1	1-67-1-0-0	15	0.0922617	0
9036	MXD4	1-67-1-0-0	15	0.0922617	0
9666	RASGEF1B	1-67-1-0-0	15	0.0922617	0
10218	AC023424.3	1-67-1-0-0	15	0.0922617	0
19602	CREM	1-67-1-0-0	15	0.0922617	0
24052	ARHGAP9	1-67-1-0-0	15	0.0922617	0
26342	AL358333.2	1-67-1-0-0	15	0.0922617	0
27256	GPR132	1-67-1-0-0	15	0.0922617	0
27956	USP3-AS1	1-67-1-0-0	15	0.0922617	0
28392	WHAMM	1-67-1-0-0	15	0.0922617	0
29774	BRD7	1-67-1-0-0	15	0.0922617	0
32968	YES1	1-67-1-0-0	15	0.0922617	0
33446	AC104365.1	1-67-1-0-0	15	0.0922617	0
146	TNFRSF14	1-43-1-0-0	15	0.0462893	0.0656733
11546	AC116366.1	1-43-1-0-0	15	0.0462893	0.0656733
11568	UQCRQ	1-43-1-0-0	15	0.0462893	0.0656733
20684	INPP5A	1-43-1-0-0	15	0.0462893	0.0656733
22582	UBE4A	1-43-1-0-0	15	0.0462893	0.0656733
22610	DDX6	1-43-1-0-0	15	0.0462893	0.0656733
22624	CCDC84	1-43-1-0-0	15	0.0462893	0.0656733
23986	CS	1-43-1-0-0	15	0.0462893	0.0656733
27562	RTF1	1-43-1-0-0	15	0.0462893	0.0656733
29986	FBXL8	1-43-1-0-0	15	0.0462893	0.0656733
31982	LRRC37A	1-43-1-0-0	15	0.0462893	0.0656733
33052	NDUFV2	1-43-1-0-0	15	0.0462893	0.0656733
34382	RAD23A	1-43-1-0-0	15	0.0462893	0.0656733
37088	CASS4	1-43-1-0-0	15	0.0462893	0.0656733
38458	CCDC134	1-43-1-0-0	15	0.0462893	0.0656733
4712	VPS54	1-41-0-0-0	15	0.0586967	0.0895309
5222	MAP4K4	1-41-0-0-0	15	0.0586967	0.0895309
6216	PLEKHM3	1-41-0-0-0	15	0.0586967	0.0895309
8048	HSPBAP1	1-41-0-0-0	15	0.0586967	0.0895309
14936	NUDCD3	1-41-0-0-0	15	0.0586967	0.0895309
18266	CARNMT1	1-41-0-0-0	15	0.0586967	0.0895309
18804	MAPKAP1	1-41-0-0-0	15	0.0586967	0.0895309
23742	DIP2B	1-41-0-0-0	15	0.0586967	0.0895309
26534	PPP2R5E	1-41-0-0-0	15	0.0586967	0.0895309
27150	WDR25	1-41-0-0-0	15	0.0586967	0.0895309
30134	NFAT5	1-41-0-0-0	15	0.0586967	0.0895309
31374	TAOK1	1-41-0-0-0	15	0.0586967	0.0895309
34296	ZNF700	1-41-0-0-0	15	0.0586967	0.0895309
36986	PREX1	1-41-0-0-0	15	0.0586967	0.0895309
39556	DOCK11	1-41-0-0-0	15	0.0586967	0.0895309
4576	AC092650.1	1-37-0-0-0	15	0.0553381	0.0678362
8888	LINC01063	1-37-0-0-0	15	0.0553381	0.0678362
13494	AL135905.1	1-37-0-0-0	15	0.0553381	0.0678362
14008	TARID	1-37-0-0-0	15	0.0553381	0.0678362
17858	RIC1	1-37-0-0-0	15	0.0553381	0.0678362
18396	BICD2	1-37-0-0-0	15	0.0553381	0.0678362
19264	PFKP	1-37-0-0-0	15	0.0553381	0.0678362
19512	ABI1	1-37-0-0-0	15	0.0553381	0.0678362
23156	KLRF1	1-37-0-0-0	15	0.0553381	0.0678362
23548	PPHLN1	1-37-0-0-0	15	0.0553381	0.0678362
23804	KRT73-AS1	1-37-0-0-0	15	0.0553381	0.0678362
24202	RAP1B	1-37-0-0-0	15	0.0553381	0.0678362
33560	TSHZ1	1-37-0-0-0	15	0.0553381	0.0678362
37716	LSS	1-37-0-0-0	15	0.0553381	0.0678362
38892	PDK3	1-37-0-0-0	15	0.0553381	0.0678362
2898	TIPRL	1-204-0-0-0	15	0.0429739	0.0526578
3586	SRP9	1-204-0-0-0	15	0.0429739	0.0526578
5446	POLR2D	1-204-0-0-0	15	0.0429739	0.0526578
6544	LINC01891	1-204-0-0-0	15	0.0429739	0.0526578
8902	NCBP2	1-204-0-0-0	15	0.0429739	0.0526578
10492	TPPP	1-204-0-0-0	15	0.0429739	0.0526578
10614	LINC02241	1-204-0-0-0	15	0.0429739	0.0526578
11468	CSNK1G3	1-204-0-0-0	15	0.0429739	0.0526578
12504	HIVEP1	1-204-0-0-0	15	0.0429739	0.0526578
19554	MTPAP	1-204-0-0-0	15	0.0429739	0.0526578
23262	CDKN1B	1-204-0-0-0	15	0.0429739	0.0526578
24522	PARPBP	1-204-0-0-0	15	0.0429739	0.0526578
24578	AC079174.2	1-204-0-0-0	15	0.0429739	0.0526578
26164	AL161665.1	1-204-0-0-0	15	0.0429739	0.0526578
32880	RFNG	1-204-0-0-0	15	0.0429739	0.0526578
3288	BTG2	1-101-0-0-0	15	0.0567328	0.0669827
12282	SQSTM1	1-101-0-0-0	15	0.0567328	0.0669827
19044	TTF1	1-101-0-0-0	15	0.0567328	0.0669827
20450	AL136368.1	1-101-0-0-0	15	0.0567328	0.0669827
22294	TAF1D	1-101-0-0-0	15	0.0567328	0.0669827
22810	APLP2	1-101-0-0-0	15	0.0567328	0.0669827
23930	DNAJC14	1-101-0-0-0	15	0.0567328	0.0669827
26186	AL121603.2	1-101-0-0-0	15	0.0567328	0.0669827
29458	AC133550.2	1-101-0-0-0	15	0.0567328	0.0669827
29796	HNRNPA1P48	1-101-0-0-0	15	0.0567328	0.0669827
31210	AC004448.2	1-101-0-0-0	15	0.0567328	0.0669827
34266	EPOR	1-101-0-0-0	15	0.0567328	0.0669827
34728	SUGP1	1-101-0-0-0	15	0.0567328	0.0669827
35580	BBC3	1-101-0-0-0	15	0.0567328	0.0669827
37954	CHCHD10	1-101-0-0-0	15	0.0567328	0.0669827
242	RERE	1-0-0-0-1	15	0.063809	0.0803586
4218	ASXL2	1-0-0-0-1	15	0.063809	0.0803586
4778	ARHGAP25	1-0-0-0-1	15	0.063809	0.0803586
6424	IRS1	1-0-0-0-1	15	0.063809	0.0803586
8776	ST6GAL1	1-0-0-0-1	15	0.063809	0.0803586
10782	AC114956.3	1-0-0-0-1	15	0.063809	0.0803586
11294	LNPEP	1-0-0-0-1	15	0.063809	0.0803586
12100	UBTD2	1-0-0-0-1	15	0.063809	0.0803586
17952	MTAP	1-0-0-0-1	15	0.063809	0.0803586
19506	APBB1IP	1-0-0-0-1	15	0.063809	0.0803586
22142	EMSY	1-0-0-0-1	15	0.063809	0.0803586
23600	PCED1B	1-0-0-0-1	15	0.063809	0.0803586
25576	PIBF1	1-0-0-0-1	15	0.063809	0.0803586
39536	AMMECR1	1-0-0-0-1	15	0.063809	0.0803586
39722	ARHGEF6	1-0-0-0-1	15	0.063809	0.0803586
4384	TTC27	1-41-1-0-0	14	0.064264	0.110495
7296	MAP4	1-41-1-0-0	14	0.064264	0.110495
11148	MSH3	1-41-1-0-0	14	0.064264	0.110495
11618	DDX46	1-41-1-0-0	14	0.064264	0.110495
12406	ECI2	1-41-1-0-0	14	0.064264	0.110495
13162	MAPK14	1-41-1-0-0	14	0.064264	0.110495
18444	PTCH1	1-41-1-0-0	14	0.064264	0.110495
18992	FNBP1	1-41-1-0-0	14	0.064264	0.110495
20592	ACADSB	1-41-1-0-0	14	0.064264	0.110495
24884	SPPL3	1-41-1-0-0	14	0.064264	0.110495
26644	DCAF5	1-41-1-0-0	14	0.064264	0.110495
27200	MARK3	1-41-1-0-0	14	0.064264	0.110495
29094	CLEC16A	1-41-1-0-0	14	0.064264	0.110495
34258	CCDC159	1-41-1-0-0	14	0.064264	0.110495
1958	KCNC4	1-161-1-0-0	14	0.0389182	0.0460532
2568	FDPS	1-161-1-0-0	14	0.0389182	0.0460532
2786	NDUFS2	1-161-1-0-0	14	0.0389182	0.0460532
6734	SRGAP3	1-161-1-0-0	14	0.0389182	0.0460532
8038	KPNA1	1-161-1-0-0	14	0.0389182	0.0460532
12006	THG1L	1-161-1-0-0	14	0.0389182	0.0460532
12920	BAG6	1-161-1-0-0	14	0.0389182	0.0460532
25004	TMED2	1-161-1-0-0	14	0.0389182	0.0460532
25228	MTIF3	1-161-1-0-0	14	0.0389182	0.0460532
27166	DYNC1H1	1-161-1-0-0	14	0.0389182	0.0460532
28224	NEIL1	1-161-1-0-0	14	0.0389182	0.0460532
31826	BECN1	1-161-1-0-0	14	0.0389182	0.0460532
34904	LSM14A	1-161-1-0-0	14	0.0389182	0.0460532
38550	NUP50	1-161-1-0-0	14	0.0389182	0.0460532
3046	TOR1AIP1	1-121-0-0-0	14	0.0531666	0.0603436
9224	MED28	1-121-0-0-0	14	0.0531666	0.0603436
13790	CD164	1-121-0-0-0	14	0.0531666	0.0603436
14322	TCP1	1-121-0-0-0	14	0.0531666	0.0603436
17830	CDC37L1-DT	1-121-0-0-0	14	0.0531666	0.0603436
19288	TASOR2	1-121-0-0-0	14	0.0531666	0.0603436
20624	EDRF1	1-121-0-0-0	14	0.0531666	0.0603436
27350	APBA2	1-121-0-0-0	14	0.0531666	0.0603436
29378	ARHGAP17	1-121-0-0-0	14	0.0531666	0.0603436
35474	ZNF296	1-121-0-0-0	14	0.0531666	0.0603436
35506	PPM1N	1-121-0-0-0	14	0.0531666	0.0603436
38100	TBC1D10A	1-121-0-0-0	14	0.0531666	0.0603436
38778	OFD1	1-121-0-0-0	14	0.0531666	0.0603436
39518	MID2	1-121-0-0-0	14	0.0531666	0.0603436
1328	TUT4	1-93-1-0-0	13	0.0553849	0.067702
2416	C2CD4D-AS1	1-93-1-0-0	13	0.0553849	0.067702
3014	COP1	1-93-1-0-0	13	0.0553849	0.067702
7394	IP6K1	1-93-1-0-0	13	0.0553849	0.067702
8168	IFT122	1-93-1-0-0	13	0.0553849	0.067702
10712	RICTOR	1-93-1-0-0	13	0.0553849	0.067702
12522	RANBP9	1-93-1-0-0	13	0.0553849	0.067702
16692	WRN	1-93-1-0-0	13	0.0553849	0.067702
20872	NAP1L4	1-93-1-0-0	13	0.0553849	0.067702
26964	TDP1	1-93-1-0-0	13	0.0553849	0.067702
27326	UBE3A	1-93-1-0-0	13	0.0553849	0.067702
31038	ELAC2	1-93-1-0-0	13	0.0553849	0.067702
32180	UTP18	1-93-1-0-0	13	0.0553849	0.067702
13636	SMIM8	1-8-6-0-0	13	0.0369436	0.0481271
17618	ADGRB1	1-8-6-0-0	13	0.0369436	0.0481271
18922	WDR34	1-8-6-0-0	13	0.0369436	0.0481271
22074	MRPL48	1-8-6-0-0	13	0.0369436	0.0481271
23310	ERP27	1-8-6-0-0	13	0.0369436	0.0481271
23710	FMNL3	1-8-6-0-0	13	0.0369436	0.0481271
24508	CHPT1	1-8-6-0-0	13	0.0369436	0.0481271
29432	NPIPB7	1-8-6-0-0	13	0.0369436	0.0481271
31488	MYO1D	1-8-6-0-0	13	0.0369436	0.0481271
34566	CPAMD8	1-8-6-0-0	13	0.0369436	0.0481271
34928	ZNF181	1-8-6-0-0	13	0.0369436	0.0481271
36746	CEP250	1-8-6-0-0	13	0.0369436	0.0481271
37616	NDUFV3	1-8-6-0-0	13	0.0369436	0.0481271
374	EFHD2	1-7-5-0-0	13	0.0656204	0.0791743
2948	PRRC2C	1-7-5-0-0	13	0.0656204	0.0791743
4148	LAPTM4A	1-7-5-0-0	13	0.0656204	0.0791743
4418	CEBPZ	1-7-5-0-0	13	0.0656204	0.0791743
10320	NEK1	1-7-5-0-0	13	0.0656204	0.0791743
15960	MTPN	1-7-5-0-0	13	0.0656204	0.0791743
21826	SART1	1-7-5-0-0	13	0.0656204	0.0791743
23174	GABARAPL1	1-7-5-0-0	13	0.0656204	0.0791743
23712	TMBIM6	1-7-5-0-0	13	0.0656204	0.0791743
33112	PTPN2	1-7-5-0-0	13	0.0656204	0.0791743
33142	RNMT	1-7-5-0-0	13	0.0656204	0.0791743
34464	DNAJB1	1-7-5-0-0	13	0.0656204	0.0791743
38922	RPGR	1-7-5-0-0	13	0.0656204	0.0791743
618	TMEM50A	1-7-0-0-0	13	0.108275	0.123842
7408	RBM5	1-7-0-0-0	13	0.108275	0.123842
8574	SKIL	1-7-0-0-0	13	0.108275	0.123842
15900	LINC-PINT	1-7-0-0-0	13	0.108275	0.123842
17496	CASC19	1-7-0-0-0	13	0.108275	0.123842
18322	AL354733.3	1-7-0-0-0	13	0.108275	0.123842
22448	SIK2	1-7-0-0-0	13	0.108275	0.123842
25610	CLN5	1-7-0-0-0	13	0.108275	0.123842
26190	FAM177A1	1-7-0-0-0	13	0.108275	0.123842
26198	NFKBIA	1-7-0-0-0	13	0.108275	0.123842
26340	GNG2	1-7-0-0-0	13	0.108275	0.123842
33242	RNF125	1-7-0-0-0	13	0.108275	0.123842
37106	RBM38	1-7-0-0-0	13	0.108275	0.123842
466	CAPZB	1-21-1-0-0	13	0.0622936	0.0829015
7590	SLMAP	1-21-1-0-0	13	0.0622936	0.0829015
10572	DAP	1-21-1-0-0	13	0.0622936	0.0829015
18306	UBQLN1	1-21-1-0-0	13	0.0622936	0.0829015
24400	NUDT4	1-21-1-0-0	13	0.0622936	0.0829015
29190	NDE1	1-21-1-0-0	13	0.0622936	0.0829015
29370	RBBP6	1-21-1-0-0	13	0.0622936	0.0829015
29798	CHD9	1-21-1-0-0	13	0.0622936	0.0829015
29858	NUP93	1-21-1-0-0	13	0.0622936	0.0829015
30970	PFAS	1-21-1-0-0	13	0.0622936	0.0829015
32468	KPNA2	1-21-1-0-0	13	0.0622936	0.0829015
35480	MARK4	1-21-1-0-0	13	0.0622936	0.0829015
39224	ZC3H12B	1-21-1-0-0	13	0.0622936	0.0829015
6882	CAPN7	1-145-0-0-0	13	0.0524409	0.0665133
9682	SEC31A	1-145-0-0-0	13	0.0524409	0.0665133
12576	AL022068.1	1-145-0-0-0	13	0.0524409	0.0665133
13470	ZNF451	1-145-0-0-0	13	0.0524409	0.0665133
16304	LMBR1	1-145-0-0-0	13	0.0524409	0.0665133
16680	GTF2E2	1-145-0-0-0	13	0.0524409	0.0665133
17716	SCX	1-145-0-0-0	13	0.0524409	0.0665133
22474	SDHD	1-145-0-0-0	13	0.0524409	0.0665133
24860	SRSF9	1-145-0-0-0	13	0.0524409	0.0665133
25072	SFSWAP	1-145-0-0-0	13	0.0524409	0.0665133
25114	ZNF891	1-145-0-0-0	13	0.0524409	0.0665133
25492	KPNA3	1-145-0-0-0	13	0.0524409	0.0665133
28660	TM2D3	1-145-0-0-0	13	0.0524409	0.0665133
4094	ROCK2	1-0-5-0-0	13	0.0514882	0.0746422
4974	TRABD2A	1-0-5-0-0	13	0.0514882	0.0746422
12460	BLOC1S5	1-0-5-0-0	13	0.0514882	0.0746422
13600	IBTK	1-0-5-0-0	13	0.0514882	0.0746422
18792	SCAI	1-0-5-0-0	13	0.0514882	0.0746422
22934	PARP11	1-0-5-0-0	13	0.0514882	0.0746422
23620	HDAC7	1-0-5-0-0	13	0.0514882	0.0746422
25482	SETDB2	1-0-5-0-0	13	0.0514882	0.0746422
28194	EDC3	1-0-5-0-0	13	0.0514882	0.0746422
28994	DNAJA3	1-0-5-0-0	13	0.0514882	0.0746422
34866	ZNF507	1-0-5-0-0	13	0.0514882	0.0746422
37754	ADA2	1-0-5-0-0	13	0.0514882	0.0746422
38134	MORC2	1-0-5-0-0	13	0.0514882	0.0746422
4866	FBXO41	1-94-0-0-1	12	0.0469755	0.0825449
5852	PRKRA	1-94-0-0-1	12	0.0469755	0.0825449
7328	PRKAR2A	1-94-0-0-1	12	0.0469755	0.0825449
10726	PRKAA1	1-94-0-0-1	12	0.0469755	0.0825449
15076	CRCP	1-94-0-0-1	12	0.0469755	0.0825449
16802	AP3M2	1-94-0-0-1	12	0.0469755	0.0825449
21112	HPS5	1-94-0-0-1	12	0.0469755	0.0825449
24756	DDX54	1-94-0-0-1	12	0.0469755	0.0825449
25268	ALOX5AP	1-94-0-0-1	12	0.0469755	0.0825449
28292	WDR61	1-94-0-0-1	12	0.0469755	0.0825449
36632	TM9SF4	1-94-0-0-1	12	0.0469755	0.0825449
39646	AIFM1	1-94-0-0-1	12	0.0469755	0.0825449
868	AL031602.2	1-84-1-0-0	12	0.0453797	0.0578992
2334	MCL1	1-84-1-0-0	12	0.0453797	0.0578992
6374	TUBA4A	1-84-1-0-0	12	0.0453797	0.0578992
6714	AC069277.1	1-84-1-0-0	12	0.0453797	0.0578992
8188	PIK3R4	1-84-1-0-0	12	0.0453797	0.0578992
14790	NT5C3A	1-84-1-0-0	12	0.0453797	0.0578992
16340	AC100810.1	1-84-1-0-0	12	0.0453797	0.0578992
21450	LPXN	1-84-1-0-0	12	0.0453797	0.0578992
27436	GOLGA8A	1-84-1-0-0	12	0.0453797	0.0578992
32692	METTL23	1-84-1-0-0	12	0.0453797	0.0578992
37376	N6AMT1	1-84-1-0-0	12	0.0453797	0.0578992
37544	AP001432.1	1-84-1-0-0	12	0.0453797	0.0578992
5632	ACVR1C	1-80-0-0-0	12	0.0392051	0.0640716
5774	METAP1D	1-80-0-0-0	12	0.0392051	0.0640716
11716	PURA	1-80-0-0-0	12	0.0392051	0.0640716
13804	AK9	1-80-0-0-0	12	0.0392051	0.0640716
18924	HMGA1P4	1-80-0-0-0	12	0.0392051	0.0640716
20622	EDRF1-DT	1-80-0-0-0	12	0.0392051	0.0640716
27672	PATL2	1-80-0-0-0	12	0.0392051	0.0640716
29810	RPGRIP1L	1-80-0-0-0	12	0.0392051	0.0640716
32740	PGS1	1-80-0-0-0	12	0.0392051	0.0640716
33438	AC027097.2	1-80-0-0-0	12	0.0392051	0.0640716
35906	ZNF701	1-80-0-0-0	12	0.0392051	0.0640716
35932	ZNF347	1-80-0-0-0	12	0.0392051	0.0640716
3098	SMG7	1-8-2-1-0	12	0.0591	0.0585918
5192	LYG1	1-8-2-1-0	12	0.0591	0.0585918
12224	FAM153A	1-8-2-1-0	12	0.0591	0.0585918
14122	ADAT2	1-8-2-1-0	12	0.0591	0.0585918
15562	AC005072.1	1-8-2-1-0	12	0.0591	0.0585918
18002	APTX	1-8-2-1-0	12	0.0591	0.0585918
19224	PNPLA7	1-8-2-1-0	12	0.0591	0.0585918
24732	HECTD4	1-8-2-1-0	12	0.0591	0.0585918
35080	ZNF790-AS1	1-8-2-1-0	12	0.0591	0.0585918
35914	ZNF611	1-8-2-1-0	12	0.0591	0.0585918
38162	SFI1	1-8-2-1-0	12	0.0591	0.0585918
39274	TAF1	1-8-2-1-0	12	0.0591	0.0585918
11034	BTF3	1-289-0-0-0	12	0.124035	0.0916907
11170	RPS23	1-289-0-0-0	12	0.124035	0.0916907
13086	CUTA	1-289-0-0-0	12	0.124035	0.0916907
13146	RPL10A	1-289-0-0-0	12	0.124035	0.0916907
14666	TOMM7	1-289-0-0-0	12	0.124035	0.0916907
21650	COX8A	1-289-0-0-0	12	0.124035	0.0916907
21806	CFL1	1-289-0-0-0	12	0.124035	0.0916907
22420	AP002433.1	1-289-0-0-0	12	0.124035	0.0916907
24854	COX6A1	1-289-0-0-0	12	0.124035	0.0916907
28904	ELOB	1-289-0-0-0	12	0.124035	0.0916907
36526	SMIM26	1-289-0-0-0	12	0.124035	0.0916907
36538	CRNKL1	1-289-0-0-0	12	0.124035	0.0916907
2586	DAP3	1-28-2-0-0	12	0.0440281	0.0777876
5436	IWS1	1-28-2-0-0	12	0.0440281	0.0777876
16006	MKRN1	1-28-2-0-0	12	0.0440281	0.0777876
19356	DHTKD1	1-28-2-0-0	12	0.0440281	0.0777876
22284	SLC36A4	1-28-2-0-0	12	0.0440281	0.0777876
24678	ANAPC7	1-28-2-0-0	12	0.0440281	0.0777876
29522	KCTD13	1-28-2-0-0	12	0.0440281	0.0777876
30212	DHODH	1-28-2-0-0	12	0.0440281	0.0777876
30726	ATP2A3	1-28-2-0-0	12	0.0440281	0.0777876
33060	AP001033.2	1-28-2-0-0	12	0.0440281	0.0777876
35352	POU2F2	1-28-2-0-0	12	0.0440281	0.0777876
36314	TBC1D20	1-28-2-0-0	12	0.0440281	0.0777876
1594	MIGA1	1-2-0-1-0	12	0.0460814	0.0750542
7568	APPL1	1-2-0-1-0	12	0.0460814	0.0750542
7914	SPICE1	1-2-0-1-0	12	0.0460814	0.0750542
10204	GATB	1-2-0-1-0	12	0.0460814	0.0750542
10988	RAD17	1-2-0-1-0	12	0.0460814	0.0750542
11394	DCP2	1-2-0-1-0	12	0.0460814	0.0750542
13676	MDN1	1-2-0-1-0	12	0.0460814	0.0750542
24348	CEP290	1-2-0-1-0	12	0.0460814	0.0750542
26278	KLHDC1	1-2-0-1-0	12	0.0460814	0.0750542
29080	ATF7IP2	1-2-0-1-0	12	0.0460814	0.0750542
32518	SLC39A11	1-2-0-1-0	12	0.0460814	0.0750542
34906	KIAA0355	1-2-0-1-0	12	0.0460814	0.0750542
4462	SOS1	1-2-0-0-0	12	0.0585454	0.0765711
16308	UBE3C	1-2-0-0-0	12	0.0585454	0.0765711
16962	ADHFE1	1-2-0-0-0	12	0.0585454	0.0765711
19244	LARP4B	1-2-0-0-0	12	0.0585454	0.0765711
20086	STAMBPL1	1-2-0-0-0	12	0.0585454	0.0765711
23202	PRH1	1-2-0-0-0	12	0.0585454	0.0765711
24708	ATXN2	1-2-0-0-0	12	0.0585454	0.0765711
24796	FBXW8	1-2-0-0-0	12	0.0585454	0.0765711
27342	GOLGA8M	1-2-0-0-0	12	0.0585454	0.0765711
27670	SPG11	1-2-0-0-0	12	0.0585454	0.0765711
29364	PRKCB	1-2-0-0-0	12	0.0585454	0.0765711
37374	AF165147.1	1-2-0-0-0	12	0.0585454	0.0765711
1168	ERI3	1-14-1-0-0	12	0.0473721	0.0729281
2046	LRIG2	1-14-1-0-0	12	0.0473721	0.0729281
3856	SDCCAG8	1-14-1-0-0	12	0.0473721	0.0729281
4730	SERTAD2	1-14-1-0-0	12	0.0473721	0.0729281
7842	AC012020.1	1-14-1-0-0	12	0.0473721	0.0729281
8946	ZNF718	1-14-1-0-0	12	0.0473721	0.0729281
9212	TAPT1-AS1	1-14-1-0-0	12	0.0473721	0.0729281
19242	DIP2C	1-14-1-0-0	12	0.0473721	0.0729281
27640	CATSPER2	1-14-1-0-0	12	0.0473721	0.0729281
28070	MAP2K5	1-14-1-0-0	12	0.0473721	0.0729281
38562	ATXN10	1-14-1-0-0	12	0.0473721	0.0729281
39138	KANTR	1-14-1-0-0	12	0.0473721	0.0729281
1106	YBX1	1-11-5-0-0	12	0.0921083	0
5342	SLC20A1	1-11-5-0-0	12	0.0921083	0
8278	DBR1	1-11-5-0-0	12	0.0921083	0
8770	EIF4A2	1-11-5-0-0	12	0.0921083	0
17994	TOPORS	1-11-5-0-0	12	0.0921083	0
19194	MAN1B1	1-11-5-0-0	12	0.0921083	0
21032	EIF4G2	1-11-5-0-0	12	0.0921083	0
23852	PCBP2	1-11-5-0-0	12	0.0921083	0
31966	ARHGAP27	1-11-5-0-0	12	0.0921083	0
34164	FBXL12	1-11-5-0-0	12	0.0921083	0
37542	DSCR9	1-11-5-0-0	12	0.0921083	0
39192	NBDY	1-11-5-0-0	12	0.0921083	0
1916	SARS	1-94-1-0-0	11	0.045575	0.071768
3006	CACYBP	1-94-1-0-0	11	0.045575	0.071768
5816	ATP5MC3	1-94-1-0-0	11	0.045575	0.071768
7312	SHISA5	1-94-1-0-0	11	0.045575	0.071768
14942	TMED4	1-94-1-0-0	11	0.045575	0.071768
18926	SET	1-94-1-0-0	11	0.045575	0.071768
21518	CD5	1-94-1-0-0	11	0.045575	0.071768
23580	SCAF11	1-94-1-0-0	11	0.045575	0.071768
34960	FXYD5	1-94-1-0-0	11	0.045575	0.071768
35124	ZNF571	1-94-1-0-0	11	0.045575	0.071768
37478	ATP5PO	1-94-1-0-0	11	0.045575	0.071768
1546	ZRANB2	1-84-0-0-0	11	0.0488748	0.068325
7098	EXOG	1-84-0-0-0	11	0.0488748	0.068325
9276	TBC1D19	1-84-0-0-0	11	0.0488748	0.068325
9748	HERC5	1-84-0-0-0	11	0.0488748	0.068325
13140	DEF6	1-84-0-0-0	11	0.0488748	0.068325
15462	AC073842.2	1-84-0-0-0	11	0.0488748	0.068325
18442	FANCC	1-84-0-0-0	11	0.0488748	0.068325
19338	CELF2	1-84-0-0-0	11	0.0488748	0.068325
21046	USP47	1-84-0-0-0	11	0.0488748	0.068325
25108	ZNF26	1-84-0-0-0	11	0.0488748	0.068325
34126	ZNF414	1-84-0-0-0	11	0.0488748	0.068325
4622	RPS27A	1-73-0-1-0	11	0.0745612	0.235387
5212	RPL31	1-73-0-1-0	11	0.0745612	0.235387
9914	RPL34	1-73-0-1-0	11	0.0745612	0.235387
20802	RPLP2	1-73-0-1-0	11	0.0745612	0.235387
28102	RPLP1	1-73-0-1-0	11	0.0745612	0.235387
28376	RPS17	1-73-0-1-0	11	0.0745612	0.235387
33720	RPS15	1-73-0-1-0	11	0.0745612	0.235387
33960	RPL36	1-73-0-1-0	11	0.0745612	0.235387
34110	RPS28	1-73-0-1-0	11	0.0745612	0.235387
35224	RPS16	1-73-0-1-0	11	0.0745612	0.235387
35652	RPL18	1-73-0-1-0	11	0.0745612	0.235387
11186	COX7C	1-7-4-0-0	11	0.106957	0.213091
18832	RPL12	1-7-4-0-0	11	0.106957	0.213091
19070	RPL7A	1-7-4-0-0	11	0.106957	0.213091
20000	RPS24	1-7-4-0-0	11	0.106957	0.213091
22628	RPS25	1-7-4-0-0	11	0.106957	0.213091
28828	RPS2	1-7-4-0-0	11	0.106957	0.213091
30852	RNASEK	1-7-4-0-0	11	0.106957	0.213091
31642	RPL23	1-7-4-0-0	11	0.106957	0.213091
31842	RPL27	1-7-4-0-0	11	0.106957	0.213091
35984	RPS9	1-7-4-0-0	11	0.106957	0.213091
36070	RPL28	1-7-4-0-0	11	0.106957	0.213091
5612	PRPF40A	1-7-1-0-0	11	0.0635876	0.0584225
7544	CACNA1D	1-7-1-0-0	11	0.0635876	0.0584225
8834	LSG1	1-7-1-0-0	11	0.0635876	0.0584225
10274	RAPGEF2	1-7-1-0-0	11	0.0635876	0.0584225
15916	AC009365.4	1-7-1-0-0	11	0.0635876	0.0584225
17378	EIF3H	1-7-1-0-0	11	0.0635876	0.0584225
24428	CEP83	1-7-1-0-0	11	0.0635876	0.0584225
25908	TOX4	1-7-1-0-0	11	0.0635876	0.0584225
28764	AL031714.1	1-7-1-0-0	11	0.0635876	0.0584225
34926	AC020910.5	1-7-1-0-0	11	0.0635876	0.0584225
39054	PCSK1N	1-7-1-0-0	11	0.0635876	0.0584225
4904	MTHFD2	1-67-0-0-0	11	0.0467056	0.0648394
10198	SH3D19	1-67-0-0-0	11	0.0467056	0.0648394
11970	MRPL22	1-67-0-0-0	11	0.0467056	0.0648394
14188	AL078581.4	1-67-0-0-0	11	0.0467056	0.0648394
20616	ZRANB1	1-67-0-0-0	11	0.0467056	0.0648394
26580	AL139022.1	1-67-0-0-0	11	0.0467056	0.0648394
30986	MYH10	1-67-0-0-0	11	0.0467056	0.0648394
31942	PLCD3	1-67-0-0-0	11	0.0467056	0.0648394
34138	ZNF317	1-67-0-0-0	11	0.0467056	0.0648394
34352	TRIR	1-67-0-0-0	11	0.0467056	0.0648394
35464	TOMM40	1-67-0-0-0	11	0.0467056	0.0648394
5196	EIF5B	1-48-0-1-0	11	0.0593629	0.0934399
8896	PAK2	1-48-0-1-0	11	0.0593629	0.0934399
13306	CNPY3	1-48-0-1-0	11	0.0593629	0.0934399
18354	SECISBP2	1-48-0-1-0	11	0.0593629	0.0934399
18980	ASB6	1-48-0-1-0	11	0.0593629	0.0934399
19824	DDX50	1-48-0-1-0	11	0.0593629	0.0934399
23352	LDHB	1-48-0-1-0	11	0.0593629	0.0934399
24962	DENR	1-48-0-1-0	11	0.0593629	0.0934399
29000	HMOX2	1-48-0-1-0	11	0.0593629	0.0934399
35680	NUCB1	1-48-0-1-0	11	0.0593629	0.0934399
39946	EIF1AY	1-48-0-1-0	11	0.0593629	0.0934399
1434	FGGY	1-31-0-0-0	11	0.0503586	0.10661
6688	SUMF1	1-31-0-0-0	11	0.0503586	0.10661
8306	SLC25A36	1-31-0-0-0	11	0.0503586	0.10661
15992	HIPK2	1-31-0-0-0	11	0.0503586	0.10661
16384	TNKS	1-31-0-0-0	11	0.0503586	0.10661
28264	SCAPER	1-31-0-0-0	11	0.0503586	0.10661
32942	TBCD	1-31-0-0-0	11	0.0503586	0.10661
33146	ROCK1	1-31-0-0-0	11	0.0503586	0.10661
34150	ZNF426	1-31-0-0-0	11	0.0503586	0.10661
34834	ZNF254	1-31-0-0-0	11	0.0503586	0.10661
39554	WDR44	1-31-0-0-0	11	0.0503586	0.10661
246	ENO1	1-247-0-0-0	11	0.0963146	0.0988913
660	CD52	1-247-0-0-0	11	0.0963146	0.0988913
12886	HLA-C	1-247-0-0-0	11	0.0963146	0.0988913
16084	TRBC2	1-247-0-0-0	11	0.0963146	0.0988913
26056	PSME1	1-247-0-0-0	11	0.0963146	0.0988913
26262	RPS29	1-247-0-0-0	11	0.0963146	0.0988913
27648	SERF2	1-247-0-0-0	11	0.0963146	0.0988913
28048	ZWILCH	1-247-0-0-0	11	0.0963146	0.0988913
30870	GABARAP	1-247-0-0-0	11	0.0963146	0.0988913
33386	ACAA2	1-247-0-0-0	11	0.0963146	0.0988913
36520	POLR3F	1-247-0-0-0	11	0.0963146	0.0988913
1632	PRKACB	1-14-4-0-0	11	0.0830368	0
6254	IKZF2	1-14-4-0-0	11	0.0830368	0
9810	AP002026.1	1-14-4-0-0	11	0.0830368	0
9902	CYP2U1	1-14-4-0-0	11	0.0830368	0
13136	Z97832.2	1-14-4-0-0	11	0.0830368	0
14370	FGFR1OP	1-14-4-0-0	11	0.0830368	0
18808	PBX3	1-14-4-0-0	11	0.0830368	0
21158	AC006299.1	1-14-4-0-0	11	0.0830368	0
23532	ABCD2	1-14-4-0-0	11	0.0830368	0
25726	AL356966.1	1-14-4-0-0	11	0.0830368	0
26430	TMEM260	1-14-4-0-0	11	0.0830368	0
1828	AC093019.2	1-134-0-0-0	11	0.0784343	0.110157
5120	ARID5A	1-134-0-0-0	11	0.0784343	0.110157
7792	TFG	1-134-0-0-0	11	0.0784343	0.110157
14902	STK17A	1-134-0-0-0	11	0.0784343	0.110157
16764	PLEKHA2	1-134-0-0-0	11	0.0784343	0.110157
19566	ZEB1	1-134-0-0-0	11	0.0784343	0.110157
24836	BICDL1	1-134-0-0-0	11	0.0784343	0.110157
29324	POLR3E	1-134-0-0-0	11	0.0784343	0.110157
29752	N4BP1	1-134-0-0-0	11	0.0784343	0.110157
37104	AL109955.1	1-134-0-0-0	11	0.0784343	0.110157
38148	PIK3IP1	1-134-0-0-0	11	0.0784343	0.110157
3816	MTR	1-12-1-0-0	11	0.063491	0.0938122
5442	WDR33	1-12-1-0-0	11	0.063491	0.0938122
6062	PLCL1	1-12-1-0-0	11	0.063491	0.0938122
8244	RYK	1-12-1-0-0	11	0.063491	0.0938122
9676	ENOPH1	1-12-1-0-0	11	0.063491	0.0938122
9924	SEC24B	1-12-1-0-0	11	0.063491	0.0938122
17464	AC090198.1	1-12-1-0-0	11	0.063491	0.0938122
22688	SORL1	1-12-1-0-0	11	0.063491	0.0938122
26378	DDHD1	1-12-1-0-0	11	0.063491	0.0938122
27770	TRPM7	1-12-1-0-0	11	0.063491	0.0938122
30990	PIK3R5	1-12-1-0-0	11	0.063491	0.0938122
2084	SIKE1	1-11-0-1-0	11	0.0896745	0.101173
2828	UAP1	1-11-0-1-0	11	0.0896745	0.101173
3732	SPRTN	1-11-0-1-0	11	0.0896745	0.101173
11592	SKP1	1-11-0-1-0	11	0.0896745	0.101173
19802	SIRT1	1-11-0-1-0	11	0.0896745	0.101173
20422	ITPRIP	1-11-0-1-0	11	0.0896745	0.101173
20440	SMNDC1	1-11-0-1-0	11	0.0896745	0.101173
22234	TMEM126A	1-11-0-1-0	11	0.0896745	0.101173
24484	SLC25A3	1-11-0-1-0	11	0.0896745	0.101173
30912	EIF4A1	1-11-0-1-0	11	0.0896745	0.101173
39316	RLIM	1-11-0-1-0	11	0.0896745	0.101173
838	EIF3I	1-11-0-0-1	11	0.072627	0.102853
1516	SERBP1	1-11-0-0-1	11	0.072627	0.102853
4302	GPN1	1-11-0-0-1	11	0.072627	0.102853
6492	PTMA	1-11-0-0-1	11	0.072627	0.102853
23686	TUBA1B	1-11-0-0-1	11	0.072627	0.102853
26976	CALM1	1-11-0-0-1	11	0.072627	0.102853
32622	H3F3B	1-11-0-0-1	11	0.072627	0.102853
32694	SRSF2	1-11-0-0-1	11	0.072627	0.102853
34582	USE1	1-11-0-0-1	11	0.072627	0.102853
37130	GNAS	1-11-0-0-1	11	0.072627	0.102853
37412	SOD1	1-11-0-0-1	11	0.072627	0.102853
2660	AL590666.5	1-0-14-0-0	11	0.0583945	0
3718	TTC13	1-0-14-0-0	11	0.0583945	0
4162	LDAH	1-0-14-0-0	11	0.0583945	0
5784	AC078883.1	1-0-14-0-0	11	0.0583945	0
5820	MTX2	1-0-14-0-0	11	0.0583945	0
7902	AC078785.1	1-0-14-0-0	11	0.0583945	0
15498	C7orf61	1-0-14-0-0	11	0.0583945	0
22974	CD27-AS1	1-0-14-0-0	11	0.0583945	0
26480	GPR135	1-0-14-0-0	11	0.0583945	0
31218	ULK2	1-0-14-0-0	11	0.0583945	0
33310	PIK3C3	1-0-14-0-0	11	0.0583945	0
692	WDTC1	1-0-1-0-0	11	0.0537873	0.0750295
1332	SHISAL2A	1-0-1-0-0	11	0.0537873	0.0750295
11334	PPIP5K2	1-0-1-0-0	11	0.0537873	0.0750295
14334	MAP3K4	1-0-1-0-0	11	0.0537873	0.0750295
16504	XPO7	1-0-1-0-0	11	0.0537873	0.0750295
18316	KIF27	1-0-1-0-0	11	0.0537873	0.0750295
18474	ZNF782	1-0-1-0-0	11	0.0537873	0.0750295
24936	MLXIP	1-0-1-0-0	11	0.0537873	0.0750295
26996	CCDC88C	1-0-1-0-0	11	0.0537873	0.0750295
32144	RSAD1	1-0-1-0-0	11	0.0537873	0.0750295
36816	CTNNBL1	1-0-1-0-0	11	0.0537873	0.0750295
904	ZMYM4	1-0-0-0-2	11	0.0522126	0.094861
4472	MAP4K3-DT	1-0-0-0-2	11	0.0522126	0.094861
5860	TTN-AS1	1-0-0-0-2	11	0.0522126	0.094861
6946	KAT2B	1-0-0-0-2	11	0.0522126	0.094861
8508	IFT80	1-0-0-0-2	11	0.0522126	0.094861
8842	ACAP2	1-0-0-0-2	11	0.0522126	0.094861
13624	SNX14	1-0-0-0-2	11	0.0522126	0.094861
25372	VWA8	1-0-0-0-2	11	0.0522126	0.094861
27462	RASGRP1	1-0-0-0-2	11	0.0522126	0.094861
33118	CEP192	1-0-0-0-2	11	0.0522126	0.094861
39356	SH3BGRL	1-0-0-0-2	11	0.0522126	0.094861
1340	ECHDC2	1-84-2-0-0	10	0.0304701	0.0747486
1394	TTC4	1-84-2-0-0	10	0.0304701	0.0747486
4138	LINC00954	1-84-2-0-0	10	0.0304701	0.0747486
5452	AC012306.3	1-84-2-0-0	10	0.0304701	0.0747486
16812	VDAC3	1-84-2-0-0	10	0.0304701	0.0747486
21574	TUT1	1-84-2-0-0	10	0.0304701	0.0747486
34094	ELAVL1	1-84-2-0-0	10	0.0304701	0.0747486
37736	S100B	1-84-2-0-0	10	0.0304701	0.0747486
38530	SAMM50	1-84-2-0-0	10	0.0304701	0.0747486
39440	GPRASP1	1-84-2-0-0	10	0.0304701	0.0747486
4006	RPS7	1-7-2-0-0	10	0.0993638	0.153147
5154	COX5B	1-7-2-0-0	10	0.0993638	0.153147
6968	RPL15	1-7-2-0-0	10	0.0993638	0.153147
7126	RPSA	1-7-2-0-0	10	0.0993638	0.153147
7306	TMA7	1-7-2-0-0	10	0.0993638	0.153147
8936	RPL35A	1-7-2-0-0	10	0.0993638	0.153147
11910	RPS14	1-7-2-0-0	10	0.0993638	0.153147
17248	RPL30	1-7-2-0-0	10	0.0993638	0.153147
30980	RPL26	1-7-2-0-0	10	0.0993638	0.153147
31658	RPL19	1-7-2-0-0	10	0.0993638	0.153147
2016	INKA2	1-67-3-0-0	10	0.056634	0.0772281
2450	CHTOP	1-67-3-0-0	10	0.056634	0.0772281
21846	CNIH2	1-67-3-0-0	10	0.056634	0.0772281
28020	SLC24A1	1-67-3-0-0	10	0.056634	0.0772281
28442	AC087286.2	1-67-3-0-0	10	0.056634	0.0772281
32738	SOCS3	1-67-3-0-0	10	0.056634	0.0772281
33258	MAPRE2	1-67-3-0-0	10	0.056634	0.0772281
37592	ZBTB21	1-67-3-0-0	10	0.056634	0.0772281
38326	JOSD1	1-67-3-0-0	10	0.056634	0.0772281
38498	POLDIP3	1-67-3-0-0	10	0.056634	0.0772281
804	PEF1	1-46-1-0-0	10	0.0484094	0.0587839
1404	USP24	1-46-1-0-0	10	0.0484094	0.0587839
4394	FAM98A	1-46-1-0-0	10	0.0484094	0.0587839
6530	ATG16L1	1-46-1-0-0	10	0.0484094	0.0587839
7070	C3orf35	1-46-1-0-0	10	0.0484094	0.0587839
11232	FAM172A	1-46-1-0-0	10	0.0484094	0.0587839
11522	CDC42SE2	1-46-1-0-0	10	0.0484094	0.0587839
14694	MPP6	1-46-1-0-0	10	0.0484094	0.0587839
17234	PTDSS1	1-46-1-0-0	10	0.0484094	0.0587839
26156	NUBPL	1-46-1-0-0	10	0.0484094	0.0587839
818	KHDRBS1	1-43-1-0-1	10	0.0388799	0.0651199
5474	FAM168B	1-43-1-0-1	10	0.0388799	0.0651199
17216	NDUFAF6	1-43-1-0-1	10	0.0388799	0.0651199
21094	PIK3C2A	1-43-1-0-1	10	0.0388799	0.0651199
21832	SF3B2	1-43-1-0-1	10	0.0388799	0.0651199
25874	APEX1	1-43-1-0-1	10	0.0388799	0.0651199
26682	MED6	1-43-1-0-1	10	0.0388799	0.0651199
30644	PRPF8	1-43-1-0-1	10	0.0388799	0.0651199
34012	KHSRP	1-43-1-0-1	10	0.0388799	0.0651199
37360	ATP5PF	1-43-1-0-1	10	0.0388799	0.0651199
864	S100PBP	1-4-3-0-0	10	0.0723342	0.0815771
3224	DDX59-AS1	1-4-3-0-0	10	0.0723342	0.0815771
3742	DISC1	1-4-3-0-0	10	0.0723342	0.0815771
7022	CMTM7	1-4-3-0-0	10	0.0723342	0.0815771
9306	TBC1D1	1-4-3-0-0	10	0.0723342	0.0815771
14766	GARS-DT	1-4-3-0-0	10	0.0723342	0.0815771
17342	OXR1	1-4-3-0-0	10	0.0723342	0.0815771
17486	AC016074.2	1-4-3-0-0	10	0.0723342	0.0815771
19938	PPP3CB	1-4-3-0-0	10	0.0723342	0.0815771
22130	UVRAG	1-4-3-0-0	10	0.0723342	0.0815771
5328	ZC3H6	1-4-0-0-0	10	0.0621664	0.119904
7618	FHIT	1-4-0-0-0	10	0.0621664	0.119904
8288	CEP70	1-4-0-0-0	10	0.0621664	0.119904
14584	UMAD1	1-4-0-0-0	10	0.0621664	0.119904
16130	TPK1	1-4-0-0-0	10	0.0621664	0.119904
20320	FBXW4	1-4-0-0-0	10	0.0621664	0.119904
22332	SESN3	1-4-0-0-0	10	0.0621664	0.119904
23590	AC008014.1	1-4-0-0-0	10	0.0621664	0.119904
26142	STRN3	1-4-0-0-0	10	0.0621664	0.119904
34820	ZNF91	1-4-0-0-0	10	0.0621664	0.119904
2756	CD244	1-348-0-0-0	10	0.0100592	0.0184418
9396	YIPF7	1-348-0-0-0	10	0.0100592	0.0184418
15450	ZSCAN21	1-348-0-0-0	10	0.0100592	0.0184418
17576	AC083843.1	1-348-0-0-0	10	0.0100592	0.0184418
20250	PYROXD2	1-348-0-0-0	10	0.0100592	0.0184418
21756	AP000944.7	1-348-0-0-0	10	0.0100592	0.0184418
22038	AP000593.4	1-348-0-0-0	10	0.0100592	0.0184418
22104	AP001372.2	1-348-0-0-0	10	0.0100592	0.0184418
31426	AC127024.5	1-348-0-0-0	10	0.0100592	0.0184418
35766	NUP62	1-348-0-0-0	10	0.0100592	0.0184418
7384	APEH	1-28-3-0-0	10	0.0609976	0
9956	ALPK1	1-28-3-0-0	10	0.0609976	0
24206	NUP107	1-28-3-0-0	10	0.0609976	0
28672	NPRL3	1-28-3-0-0	10	0.0609976	0
32326	APPBP2	1-28-3-0-0	10	0.0609976	0
33308	AC015961.2	1-28-3-0-0	10	0.0609976	0
35588	DHX34	1-28-3-0-0	10	0.0609976	0
36348	SIRPG	1-28-3-0-0	10	0.0609976	0
37944	DRICH1	1-28-3-0-0	10	0.0609976	0
38736	PNPLA4	1-28-3-0-0	10	0.0609976	0
15480	CASTOR3	1-22-5-0-0	10	0.0466596	0.0571591
19626	ZNF37A	1-22-5-0-0	10	0.0466596	0.0571591
21720	MAJIN	1-22-5-0-0	10	0.0466596	0.0571591
28352	STARD5	1-22-5-0-0	10	0.0466596	0.0571591
29016	ANKS3	1-22-5-0-0	10	0.0466596	0.0571591
30128	TMED6	1-22-5-0-0	10	0.0466596	0.0571591
30824	NLRP1	1-22-5-0-0	10	0.0466596	0.0571591
31340	FAM222B	1-22-5-0-0	10	0.0466596	0.0571591
35734	SCAF1	1-22-5-0-0	10	0.0466596	0.0571591
38362	CBX7	1-22-5-0-0	10	0.0466596	0.0571591
14532	EIF2AK1	1-21-2-0-0	10	0.0461535	0.056103
19228	DPH7	1-21-2-0-0	10	0.0461535	0.056103
22548	PCSK7	1-21-2-0-0	10	0.0461535	0.056103
24408	SOCS2	1-21-2-0-0	10	0.0461535	0.056103
25812	PCID2	1-21-2-0-0	10	0.0461535	0.056103
29658	KAT8	1-21-2-0-0	10	0.0461535	0.056103
30068	DPEP2	1-21-2-0-0	10	0.0461535	0.056103
34148	ZNF266	1-21-2-0-0	10	0.0461535	0.056103
34910	GPI	1-21-2-0-0	10	0.0461535	0.056103
39582	UPF3B	1-21-2-0-0	10	0.0461535	0.056103
3786	TBCE	1-21-1-1-0	10	0.0502978	0.0675176
6382	DNPEP	1-21-1-1-0	10	0.0502978	0.0675176
12812	ZNRD1	1-21-1-1-0	10	0.0502978	0.0675176
13834	REV3L	1-21-1-1-0	10	0.0502978	0.0675176
24040	STAC3	1-21-1-1-0	10	0.0502978	0.0675176
30602	VPS53	1-21-1-1-0	10	0.0502978	0.0675176
34214	KRI1	1-21-1-1-0	10	0.0502978	0.0675176
36326	PSMF1	1-21-1-1-0	10	0.0502978	0.0675176
38418	EP300	1-21-1-1-0	10	0.0502978	0.0675176
39090	CCDC22	1-21-1-1-0	10	0.0502978	0.0675176
7606	AC135507.1	1-2-10-0-0	10	0.0484869	0.0576567
13606	DOP1A	1-2-10-0-0	10	0.0484869	0.0576567
14498	SDK1	1-2-10-0-0	10	0.0484869	0.0576567
17298	RRM2B	1-2-10-0-0	10	0.0484869	0.0576567
20222	MMS19	1-2-10-0-0	10	0.0484869	0.0576567
24852	SIRT4	1-2-10-0-0	10	0.0484869	0.0576567
25010	GTF2H3	1-2-10-0-0	10	0.0484869	0.0576567
27588	VPS39	1-2-10-0-0	10	0.0484869	0.0576567
27932	VPS13C	1-2-10-0-0	10	0.0484869	0.0576567
29844	BBS2	1-2-10-0-0	10	0.0484869	0.0576567
454	EMC1-AS1	1-197-0-0-0	10	0.0556455	0.04514
14330	SLC22A1	1-197-0-0-0	10	0.0556455	0.04514
17092	FABP5	1-197-0-0-0	10	0.0556455	0.04514
19540	LINC02652	1-197-0-0-0	10	0.0556455	0.04514
22510	ZBTB16	1-197-0-0-0	10	0.0556455	0.04514
28266	RCN2	1-197-0-0-0	10	0.0556455	0.04514
30720	NCBP3	1-197-0-0-0	10	0.0556455	0.04514
32410	ERN1	1-197-0-0-0	10	0.0556455	0.04514
34354	GET3	1-197-0-0-0	10	0.0556455	0.04514
35618	AC011466.3	1-197-0-0-0	10	0.0556455	0.04514
6883	CAPN7_flip	1-144-0-0-0	10	0.0527994	0.0634589
13471	ZNF451_flip	1-144-0-0-0	10	0.0527994	0.0634589
16305	LMBR1_flip	1-144-0-0-0	10	0.0527994	0.0634589
17717	SCX_flip	1-144-0-0-0	10	0.0527994	0.0634589
22475	SDHD_flip	1-144-0-0-0	10	0.0527994	0.0634589
24861	SRSF9_flip	1-144-0-0-0	10	0.0527994	0.0634589
25073	SFSWAP_flip	1-144-0-0-0	10	0.0527994	0.0634589
25115	ZNF891_flip	1-144-0-0-0	10	0.0527994	0.0634589
25493	KPNA3_flip	1-144-0-0-0	10	0.0527994	0.0634589
28661	TM2D3_flip	1-144-0-0-0	10	0.0527994	0.0634589
1466	ALG6	1-14-3-0-0	10	0.0621758	0.934493
3170	UCHL5	1-14-3-0-0	10	0.0621758	0.934493
6910	OXNAD1	1-14-3-0-0	10	0.0621758	0.934493
7660	SUCLG2	1-14-3-0-0	10	0.0621758	0.934493
8538	PDCD10	1-14-3-0-0	10	0.0621758	0.934493
9926	MCUB	1-14-3-0-0	10	0.0621758	0.934493
12422	FARS2	1-14-3-0-0	10	0.0621758	0.934493
18142	ZCCHC7	1-14-3-0-0	10	0.0621758	0.934493
19416	MINDY3	1-14-3-0-0	10	0.0621758	0.934493
33470	PIGN	1-14-3-0-0	10	0.0621758	0.934493
4790	AAK1	1-14-1-1-0	10	0.064739	0.0906328
6518	GIGYF2	1-14-1-1-0	10	0.064739	0.0906328
7560	TASOR	1-14-1-1-0	10	0.064739	0.0906328
9602	USO1	1-14-1-1-0	10	0.064739	0.0906328
10928	CENPK	1-14-1-1-0	10	0.064739	0.0906328
12186	NSD1	1-14-1-1-0	10	0.064739	0.0906328
15644	ATXN7L1	1-14-1-1-0	10	0.064739	0.0906328
27422	KATNBL1	1-14-1-1-0	10	0.064739	0.0906328
31388	SSH2	1-14-1-1-0	10	0.064739	0.0906328
38948	CASK	1-14-1-1-0	10	0.064739	0.0906328
8032	FAM162A	1-11-2-0-0	10	0.0869949	0.146028
10884	PLK2	1-11-2-0-0	10	0.0869949	0.146028
12092	NPM1	1-11-2-0-0	10	0.0869949	0.146028
13628	SNHG5	1-11-2-0-0	10	0.0869949	0.146028
13820	AMD1	1-11-2-0-0	10	0.0869949	0.146028
18078	VCP	1-11-2-0-0	10	0.0869949	0.146028
25252	UBL3	1-11-2-0-0	10	0.0869949	0.146028
29076	C16orf72	1-11-2-0-0	10	0.0869949	0.146028
38850	EIF1AX	1-11-2-0-0	10	0.0869949	0.146028
39926	DDX3Y	1-11-2-0-0	10	0.0869949	0.146028
186	RPL22	1-11-1-0-0	10	0.0844654	0.22017
5464	MZT2B	1-11-1-0-0	10	0.0844654	0.22017
7808	RPL24	1-11-1-0-0	10	0.0844654	0.22017
17660	EEF1D	1-11-1-0-0	10	0.0844654	0.22017
17930	RPS6	1-11-1-0-0	10	0.0844654	0.22017
24844	RPLP0	1-11-1-0-0	10	0.0844654	0.22017
32820	ACTG1	1-11-1-0-0	10	0.0844654	0.22017
35336	RPS19	1-11-1-0-0	10	0.0844654	0.22017
35608	NOP53	1-11-1-0-0	10	0.0844654	0.22017
39908	RPS4Y1	1-11-1-0-0	10	0.0844654	0.22017
5878	CCDC141	1-0-2-0-0	10	0.0499804	0.200464
6228	RPE	1-0-2-0-0	10	0.0499804	0.200464
8372	HLTF	1-0-2-0-0	10	0.0499804	0.200464
10226	ARFIP1	1-0-2-0-0	10	0.0499804	0.200464
16648	HMBOX1	1-0-2-0-0	10	0.0499804	0.200464
17150	DECR1	1-0-2-0-0	10	0.0499804	0.200464
17796	KANK1	1-0-2-0-0	10	0.0499804	0.200464
17898	TTC39B	1-0-2-0-0	10	0.0499804	0.200464
17970	IFT74	1-0-2-0-0	10	0.0499804	0.200464
29742	PHKB	1-0-2-0-0	10	0.0499804	0.200464
3270	RABIF	1-88-0-0-0	9	0.0706471	0.0752883
10468	FRG1	1-88-0-0-0	9	0.0706471	0.0752883
18886	C9orf16	1-88-0-0-0	9	0.0706471	0.0752883
23142	KLRB1	1-88-0-0-0	9	0.0706471	0.0752883
30042	AC010530.1	1-88-0-0-0	9	0.0706471	0.0752883
30892	TMEM256	1-88-0-0-0	9	0.0706471	0.0752883
33384	RPL17	1-88-0-0-0	9	0.0706471	0.0752883
34894	WDR88	1-88-0-0-0	9	0.0706471	0.0752883
38322	AL021707.9	1-88-0-0-0	9	0.0706471	0.0752883
656	SH3BGRL3	1-73-0-1-1	9	0.103723	0.124429
6182	EEF1B2	1-73-0-1-1	9	0.103723	0.124429
12164	HIGD2A	1-73-0-1-1	9	0.103723	0.124429
16534	PDLIM2	1-73-0-1-1	9	0.103723	0.124429
17012	RPL7	1-73-0-1-1	9	0.103723	0.124429
25968	DAD1	1-73-0-1-1	9	0.103723	0.124429
35486	TRAPPC6A	1-73-0-1-1	9	0.103723	0.124429
38696	SLC25A6	1-73-0-1-1	9	0.103723	0.124429
39568	SLC25A5	1-73-0-1-1	9	0.103723	0.124429
2736	COPA	1-7-3-1-0	9	0.0459271	0.11589
7336	ARIH2	1-7-3-1-0	9	0.0459271	0.11589
14782	LSM5	1-7-3-1-0	9	0.0459271	0.11589
15340	FAM133B	1-7-3-1-0	9	0.0459271	0.11589
19140	SEC16A	1-7-3-1-0	9	0.0459271	0.11589
20782	AC131934.1	1-7-3-1-0	9	0.0459271	0.11589
21324	CRY2	1-7-3-1-0	9	0.0459271	0.11589
22322	CWC15	1-7-3-1-0	9	0.0459271	0.11589
26902	SNW1	1-7-3-1-0	9	0.0459271	0.11589
228	TNFRSF9	1-41-3-0-0	9	0.0132715	0.0240078
3306	PLEKHA6	1-41-3-0-0	9	0.0132715	0.0240078
13202	TBC1D22B	1-41-3-0-0	9	0.0132715	0.0240078
22460	C11orf1	1-41-3-0-0	9	0.0132715	0.0240078
23216	TAS2R31	1-41-3-0-0	9	0.0132715	0.0240078
24614	LINC01498	1-41-3-0-0	9	0.0132715	0.0240078
25542	AL359513.1	1-41-3-0-0	9	0.0132715	0.0240078
25724	GGACT	1-41-3-0-0	9	0.0132715	0.0240078
39664	FIRRE	1-41-3-0-0	9	0.0132715	0.0240078
4072	HPCAL1	1-4-1-0-0	9	0.0662207	0.076338
4300	CCDC121	1-4-1-0-0	9	0.0662207	0.076338
7558	CCDC66	1-4-1-0-0	9	0.0662207	0.076338
10190	LRBA	1-4-1-0-0	9	0.0662207	0.076338
15392	TECPR1	1-4-1-0-0	9	0.0662207	0.076338
15972	TRIM24	1-4-1-0-0	9	0.0662207	0.076338
25840	RASA3	1-4-1-0-0	9	0.0662207	0.076338
26244	C14orf28	1-4-1-0-0	9	0.0662207	0.076338
31102	CCDC144A	1-4-1-0-0	9	0.0662207	0.076338
9464	AC105384.1	1-230-1-0-0	9	0.0244463	0.0421907
25098	GOLGA3	1-230-1-0-0	9	0.0244463	0.0421907
27626	ADAL	1-230-1-0-0	9	0.0244463	0.0421907
28554	RCCD1	1-230-1-0-0	9	0.0244463	0.0421907
28838	ZNF598	1-230-1-0-0	9	0.0244463	0.0421907
29020	ZNF500	1-230-1-0-0	9	0.0244463	0.0421907
29610	TMEM265	1-230-1-0-0	9	0.0244463	0.0421907
32638	FBF1	1-230-1-0-0	9	0.0244463	0.0421907
35758	PNKP	1-230-1-0-0	9	0.0244463	0.0421907
278	LZIC	1-226-0-1-0	9	0.0760775	0.0669634
3644	MRPL55	1-226-0-1-0	9	0.0760775	0.0669634
5000	RNF181	1-226-0-1-0	9	0.0760775	0.0669634
11382	EPB41L4A-AS1	1-226-0-1-0	9	0.0760775	0.0669634
18684	ATP6V1G1	1-226-0-1-0	9	0.0760775	0.0669634
18988	C9orf78	1-226-0-1-0	9	0.0760775	0.0669634
20296	NDUFB8	1-226-0-1-0	9	0.0760775	0.0669634
29014	NUDT16L1	1-226-0-1-0	9	0.0760775	0.0669634
32536	RPL38	1-226-0-1-0	9	0.0760775	0.0669634
1180	RPS8	1-21-0-1-0	9	0.0860256	0.088101
15038	CHCHD2	1-21-0-1-0	9	0.0860256	0.088101
16014	NDUFB2	1-21-0-1-0	9	0.0860256	0.088101
19556	MAP3K8	1-21-0-1-0	9	0.0860256	0.088101
23838	PFDN5	1-21-0-1-0	9	0.0860256	0.088101
30160	DDX19A	1-21-0-1-0	9	0.0860256	0.088101
34700	REX1BD	1-21-0-1-0	9	0.0860256	0.088101
35518	SNRPD2	1-21-0-1-0	9	0.0860256	0.088101
36052	PPP6R1	1-21-0-1-0	9	0.0860256	0.088101
5650	BAZ2B	1-2-3-0-0	9	0.0522016	0
9578	MTHFD2L	1-2-3-0-0	9	0.0522016	0
10296	KLHL2	1-2-3-0-0	9	0.0522016	0
12606	GPLD1	1-2-3-0-0	9	0.0522016	0
13814	METTL24	1-2-3-0-0	9	0.0522016	0
17590	TRAPPC9	1-2-3-0-0	9	0.0522016	0
22930	CRACR2A	1-2-3-0-0	9	0.0522016	0
24142	TBK1	1-2-3-0-0	9	0.0522016	0
24358	POC1B	1-2-3-0-0	9	0.0522016	0
3959	PGBD2_flip	1-148-0-0-0	9	0.0135661	0.0232388
8335	GK5_flip	1-148-0-0-0	9	0.0135661	0.0232388
16607	DPYSL2_flip	1-148-0-0-0	9	0.0135661	0.0232388
17755	LRRC24_flip	1-148-0-0-0	9	0.0135661	0.0232388
22951	AKAP3_flip	1-148-0-0-0	9	0.0135661	0.0232388
25237	PAN3-AS1_flip	1-148-0-0-0	9	0.0135661	0.0232388
35187	AC011455.1_flip	1-148-0-0-0	9	0.0135661	0.0232388
37859	ZNF74_flip	1-148-0-0-0	9	0.0135661	0.0232388
38373	SYNGR1_flip	1-148-0-0-0	9	0.0135661	0.0232388
5284	RANBP2	1-11-3-0-1	9	0.0604559	0.0928328
11198	CCNH	1-11-3-0-1	9	0.0604559	0.0928328
15696	PNPLA8	1-11-3-0-1	9	0.0604559	0.0928328
17282	PABPC1	1-11-3-0-1	9	0.0604559	0.0928328
20130	BTAF1	1-11-3-0-1	9	0.0604559	0.0928328
27044	DDX24	1-11-3-0-1	9	0.0604559	0.0928328
28148	ARIH1	1-11-3-0-1	9	0.0604559	0.0928328
32668	UBE2O	1-11-3-0-1	9	0.0604559	0.0928328
36850	TOP1	1-11-3-0-1	9	0.0604559	0.0928328
8148	ISY1	1-11-3-0-0	9	0.0514036	0.0749001
8750	SENP2	1-11-3-0-0	9	0.0514036	0.0749001
15090	RABGEF1	1-11-3-0-0	9	0.0514036	0.0749001
15390	LMTK2	1-11-3-0-0	9	0.0514036	0.0749001
20234	ZFYVE27	1-11-3-0-0	9	0.0514036	0.0749001
20416	CFAP43	1-11-3-0-0	9	0.0514036	0.0749001
22218	ANKRD42	1-11-3-0-0	9	0.0514036	0.0749001
29026	GLYR1	1-11-3-0-0	9	0.0514036	0.0749001
35598	NAPA	1-11-3-0-0	9	0.0514036	0.0749001
8462	TIPARP	1-109-0-0-0	9	0.06604	0.122045
8762	DNAJB11	1-109-0-0-0	9	0.06604	0.122045
8934	IQCG	1-109-0-0-0	9	0.06604	0.122045
14608	ARL4A	1-109-0-0-0	9	0.06604	0.122045
14632	AHR	1-109-0-0-0	9	0.06604	0.122045
14806	HERPUD2	1-109-0-0-0	9	0.06604	0.122045
23082	SLC2A3	1-109-0-0-0	9	0.06604	0.122045
24552	TXNRD1	1-109-0-0-0	9	0.06604	0.122045
37004	ZFAS1	1-109-0-0-0	9	0.06604	0.122045
8992	AC092535.4	1-98-4-0-0	8	0.0360985	0.0442834
11048	GFM2	1-98-4-0-0	8	0.0360985	0.0442834
13698	UFL1-AS1	1-98-4-0-0	8	0.0360985	0.0442834
22408	AP000766.1	1-98-4-0-0	8	0.0360985	0.0442834
27702	C15orf48	1-98-4-0-0	8	0.0360985	0.0442834
30108	TANGO6	1-98-4-0-0	8	0.0360985	0.0442834
31262	KSR1	1-98-4-0-0	8	0.0360985	0.0442834
37034	PARD6B	1-98-4-0-0	8	0.0360985	0.0442834
966	GNL2	1-73-0-2-0	8	0.0554199	0.0993928
3092	DHX9	1-73-0-2-0	8	0.0554199	0.0993928
5748	SSB	1-73-0-2-0	8	0.0554199	0.0993928
10950	SREK1	1-73-0-2-0	8	0.0554199	0.0993928
16936	YTHDF3	1-73-0-2-0	8	0.0554199	0.0993928
27738	COPS2	1-73-0-2-0	8	0.0554199	0.0993928
29268	THUMPD1	1-73-0-2-0	8	0.0554199	0.0993928
36880	OSER1	1-73-0-2-0	8	0.0554199	0.0993928
5384	CCDC93	1-7-0-1-0	8	0.0952063	0.0831771
5430	AC068282.1	1-7-0-1-0	8	0.0952063	0.0831771
8724	EIF4G1	1-7-0-1-0	8	0.0952063	0.0831771
10322	AC084724.1	1-7-0-1-0	8	0.0952063	0.0831771
17868	RANBP6	1-7-0-1-0	8	0.0952063	0.0831771
29326	AC092338.3	1-7-0-1-0	8	0.0952063	0.0831771
31246	NATD1	1-7-0-1-0	8	0.0952063	0.0831771
36786	TGIF2	1-7-0-1-0	8	0.0952063	0.0831771
10674	RAD1	1-67-2-0-0	8	0.0678086	0.0635966
11824	YIPF5	1-67-2-0-0	8	0.0678086	0.0635966
14072	TNFAIP3	1-67-2-0-0	8	0.0678086	0.0635966
14292	DYNLT1	1-67-2-0-0	8	0.0678086	0.0635966
17028	TMEM70	1-67-2-0-0	8	0.0678086	0.0635966
21888	RBM14	1-67-2-0-0	8	0.0678086	0.0635966
24316	AC073569.2	1-67-2-0-0	8	0.0678086	0.0635966
36460	TMX4	1-67-2-0-0	8	0.0678086	0.0635966
1576	ST6GALNAC3	1-37-5-0-0	8	0.0672489	0.119923
11224	ARRDC3	1-37-5-0-0	8	0.0672489	0.119923
15788	WASL	1-37-5-0-0	8	0.0672489	0.119923
19218	EXD3	1-37-5-0-0	8	0.0672489	0.119923
24160	LEMD3	1-37-5-0-0	8	0.0672489	0.119923
29328	CDR2	1-37-5-0-0	8	0.0672489	0.119923
29806	AC007342.1	1-37-5-0-0	8	0.0672489	0.119923
39884	BRCC3	1-37-5-0-0	8	0.0672489	0.119923
7980	TIMMDC1	1-2-2-0-0	8	0.0468857	0.0876741
9824	DNAJB14	1-2-2-0-0	8	0.0468857	0.0876741
11254	TTC37	1-2-2-0-0	8	0.0468857	0.0876741
11862	FBXO38	1-2-2-0-0	8	0.0468857	0.0876741
23904	NCKAP1L	1-2-2-0-0	8	0.0468857	0.0876741
24566	WASHC4	1-2-2-0-0	8	0.0468857	0.0876741
31000	STX8	1-2-2-0-0	8	0.0468857	0.0876741
34554	SMIM7	1-2-2-0-0	8	0.0468857	0.0876741
1506	MIER1	1-161-0-0-0	8	0.0457162	0.115268
1532	SRSF11	1-161-0-0-0	8	0.0457162	0.115268
1536	ANKRD13C	1-161-0-0-0	8	0.0457162	0.115268
4520	PPM1B	1-161-0-0-0	8	0.0457162	0.115268
8672	ATP11B	1-161-0-0-0	8	0.0457162	0.115268
10646	ZFR	1-161-0-0-0	8	0.0457162	0.115268
16266	KMT2C	1-161-0-0-0	8	0.0457162	0.115268
33078	VAPA	1-161-0-0-0	8	0.0457162	0.115268
4232	ADGRF3	1-156-1-0-0	8	0.0358341	0.0535839
14132	LTV1	1-156-1-0-0	8	0.0358341	0.0535839
16784	GOLGA7	1-156-1-0-0	8	0.0358341	0.0535839
19004	EXOSC2	1-156-1-0-0	8	0.0358341	0.0535839
19892	ANAPC16	1-156-1-0-0	8	0.0358341	0.0535839
29084	NUBP1	1-156-1-0-0	8	0.0358341	0.0535839
35178	ECH1	1-156-1-0-0	8	0.0358341	0.0535839
35390	XRCC1	1-156-1-0-0	8	0.0358341	0.0535839
3030	ANGPTL1	1-142-1-0-0	8	0.0426172	0.0224325
8982	DGKQ	1-142-1-0-0	8	0.0426172	0.0224325
19934	AL512656.1	1-142-1-0-0	8	0.0426172	0.0224325
20528	AC022395.1	1-142-1-0-0	8	0.0426172	0.0224325
25432	LCP1	1-142-1-0-0	8	0.0426172	0.0224325
29354	NDUFAB1	1-142-1-0-0	8	0.0426172	0.0224325
34108	NDUFA7	1-142-1-0-0	8	0.0426172	0.0224325
35002	ARHGAP33	1-142-1-0-0	8	0.0426172	0.0224325
4848	ZNF638	1-14-0-1-0	8	0.0606031	0.104593
14404	FAM120B	1-14-0-1-0	8	0.0606031	0.104593
14866	VPS41	1-14-0-1-0	8	0.0606031	0.104593
20472	VTI1A	1-14-0-1-0	8	0.0606031	0.104593
20794	AP006621.3	1-14-0-1-0	8	0.0606031	0.104593
21014	SBF2	1-14-0-1-0	8	0.0606031	0.104593
29422	XPO6	1-14-0-1-0	8	0.0606031	0.104593
33234	TRAPPC8	1-14-0-1-0	8	0.0606031	0.104593
9656	AC021127.1	1-131-1-0-0	8	0.0136767	0
14732	CREB5	1-131-1-0-0	8	0.0136767	0
16342	ARHGEF10	1-131-1-0-0	8	0.0136767	0
20032	AC021028.1	1-131-1-0-0	8	0.0136767	0
25970	ABHD4	1-131-1-0-0	8	0.0136767	0
32522	COG1	1-131-1-0-0	8	0.0136767	0
33932	DPP9-AS1	1-131-1-0-0	8	0.0136767	0
36396	LZTS3	1-131-1-0-0	8	0.0136767	0
1808	PTBP2	1-122-2-0-0	8	0.0517196	0.076235
4602	PSME4	1-122-2-0-0	8	0.0517196	0.076235
9228	DCAF16	1-122-2-0-0	8	0.0517196	0.076235
11526	FNIP1	1-122-2-0-0	8	0.0517196	0.076235
19714	WASHC2A	1-122-2-0-0	8	0.0517196	0.076235
21064	FAR1	1-122-2-0-0	8	0.0517196	0.076235
30410	USP10	1-122-2-0-0	8	0.0517196	0.076235
38062	EWSR1	1-122-2-0-0	8	0.0517196	0.076235
8220	UBA5	1-122-0-0-0	8	0.0336342	0.0574946
12010	CLINT1	1-122-0-0-0	8	0.0336342	0.0574946
15686	DLD	1-122-0-0-0	8	0.0336342	0.0574946
16038	SSBP1	1-122-0-0-0	8	0.0336342	0.0574946
23976	RNF41	1-122-0-0-0	8	0.0336342	0.0574946
24594	TMEM263	1-122-0-0-0	8	0.0336342	0.0574946
33104	PSMG2	1-122-0-0-0	8	0.0336342	0.0574946
36340	NSFL1C	1-122-0-0-0	8	0.0336342	0.0574946
13656	PNRC1	1-11-1-1-0	8	0.133382	0.158042
14104	CITED2	1-11-1-1-0	8	0.133382	0.158042
26824	FOS	1-11-1-1-0	8	0.133382	0.158042
30956	VAMP2	1-11-1-1-0	8	0.133382	0.158042
34336	MAN2B1	1-11-1-1-0	8	0.133382	0.158042
34358	JUNB	1-11-1-1-0	8	0.133382	0.158042
34672	JUND	1-11-1-1-0	8	0.133382	0.158042
39136	TSPYL2	1-11-1-1-0	8	0.133382	0.158042
1292	TTC39A	1-105-0-0-0	8	0.0423077	0
1690	PKN2-AS1	1-105-0-0-0	8	0.0423077	0
6588	ASB1	1-105-0-0-0	8	0.0423077	0
9190	CPEB2	1-105-0-0-0	8	0.0423077	0
11628	C5orf66	1-105-0-0-0	8	0.0423077	0
18228	MAMDC2	1-105-0-0-0	8	0.0423077	0
20330	KCNIP2-AS1	1-105-0-0-0	8	0.0423077	0
24986	CDK2AP1	1-105-0-0-0	8	0.0423077	0
12958	SNHG32	1-101-0-1-0	8	0.040096	0.0366472
15852	AC009244.2	1-101-0-1-0	8	0.040096	0.0366472
16632	PNOC	1-101-0-1-0	8	0.040096	0.0366472
19488	OTUD1	1-101-0-1-0	8	0.040096	0.0366472
21392	NDUFS3	1-101-0-1-0	8	0.040096	0.0366472
21774	SCYL1	1-101-0-1-0	8	0.040096	0.0366472
28126	AC022872.1	1-101-0-1-0	8	0.040096	0.0366472
38210	RBFOX2	1-101-0-1-0	8	0.040096	0.0366472
2368	GABPB2	1-0-4-0-0	8	0.0519893	0.0793205
11928	CCDC69	1-0-4-0-0	8	0.0519893	0.0793205
19042	SETX	1-0-4-0-0	8	0.0519893	0.0793205
21468	FAM111A	1-0-4-0-0	8	0.0519893	0.0793205
24712	ACAD10	1-0-4-0-0	8	0.0519893	0.0793205
30238	AC009120.2	1-0-4-0-0	8	0.0519893	0.0793205
36514	ZNF133	1-0-4-0-0	8	0.0519893	0.0793205
38544	PRR5	1-0-4-0-0	8	0.0519893	0.0793205
5398	PTPN4	1-0-0-0-3	8	0.0505946	0.0840524
10944	ERBIN	1-0-0-0-3	8	0.0505946	0.0840524
11134	SERINC5	1-0-0-0-3	8	0.0505946	0.0840524
13292	UBR2	1-0-0-0-3	8	0.0505946	0.0840524
15004	IKZF1	1-0-0-0-3	8	0.0505946	0.0840524
24818	TAOK3	1-0-0-0-3	8	0.0505946	0.0840524
27916	ICE2	1-0-0-0-3	8	0.0505946	0.0840524
31976	KANSL1	1-0-0-0-3	8	0.0505946	0.0840524
13320	RRP36	1-94-3-0-0	7	0.0152305	0.0499129
19200	SSNA1	1-94-3-0-0	7	0.0152305	0.0499129
20750	SIGIRR	1-94-3-0-0	7	0.0152305	0.0499129
21594	UQCC3	1-94-3-0-0	7	0.0152305	0.0499129
22348	CCDC82	1-94-3-0-0	7	0.0152305	0.0499129
28812	SPSB3	1-94-3-0-0	7	0.0152305	0.0499129
33172	RBBP8	1-94-3-0-0	7	0.0152305	0.0499129
3340	MFSD4A	1-84-4-0-0	7	0.0253739	0.0939687
11952	MFAP3	1-84-4-0-0	7	0.0253739	0.0939687
13246	OARD1	1-84-4-0-0	7	0.0253739	0.0939687
25592	TBC1D4	1-84-4-0-0	7	0.0253739	0.0939687
30188	ZNF23	1-84-4-0-0	7	0.0253739	0.0939687
32948	B3GNTL1	1-84-4-0-0	7	0.0253739	0.0939687
36570	AL035661.2	1-84-4-0-0	7	0.0253739	0.0939687
13338	DNPH1	1-83-2-0-0	7	0.0364045	0
14210	MTHFD1L	1-83-2-0-0	7	0.0364045	0
15926	AKR1B1	1-83-2-0-0	7	0.0364045	0
19958	ZSWIM8	1-83-2-0-0	7	0.0364045	0
20216	PGAM1	1-83-2-0-0	7	0.0364045	0
23764	DAZAP2	1-83-2-0-0	7	0.0364045	0
36172	ZNF17	1-83-2-0-0	7	0.0364045	0
7708	EBLN2	1-8-0-0-0	7	0.0209683	0.0297858
14368	Z94721.3	1-8-0-0-0	7	0.0209683	0.0297858
15506	SAP25	1-8-0-0-0	7	0.0209683	0.0297858
18098	SIT1	1-8-0-0-0	7	0.0209683	0.0297858
20278	ERLIN1	1-8-0-0-0	7	0.0209683	0.0297858
29720	MYLK3	1-8-0-0-0	7	0.0209683	0.0297858
32072	CALCOCO2	1-8-0-0-0	7	0.0209683	0.0297858
4495	AC016735.1_flip	1-79-4-0-0	7	0.00581303	0
6973	LINC00691_flip	1-79-4-0-0	7	0.00581303	0
7130	AC099332.1	1-79-4-0-0	7	0.00581303	0
17509	AC108925.1_flip	1-79-4-0-0	7	0.00581303	0
[truncated: 2,519 more rows]

## Sheet: filtered_Naïve_CD4+_T_cells
	gene	clustering results	the numbers of genes	The cohesion of the last layer	The separation of the last layer
[truncated: 4,875 more rows]

[truncated: 7 more sheets: filtered_Naïve_B, filtered_MAIT, filtered_Intermediate_B, filtered_CD16+_Mono, filtered_CD14+_Mono, filtered_CD8+_Tem, filtered_CD4+_Tcm]
