# Supplementary material for: Single-cell multiomics analysis reveals SARS-CoV-2 inactivated vaccine-induced trained immunity modulated by epigenetic remodeling
Source: Research Square preprint supplement (doi:10.21203/rs.3.rs-3706251/v1), 2024-01-09
Supplement: Supplementary file 2 [file aeeffc4212339e325a998874.xlsx]

## Sheet: Sheet1
SAMPLE	BEFOR QC					AFTER QC
	number of cells	Median genes	Median counts	Mean percent.mt	Multiplet Rate(DoubletDecon)	number of cells	Median genes	Median counts	Mean percent.mt	Mean nFrags	Notes
M1-1	10275	1940	4605	8.052	0.117177	6569	1981	4751	5.663	6947.12
M1-2	15640	1717	3638	7.7834	0.230465	9592	1790	3885	5.805	8106.69
M1-3	9267	1536	2990	8.1049	0.1601	4770	1574	3097	5.7534	9846.06
M1-4	11754	1924	4186	6.6704	0.118	8404	1954	4291	4.7953	10208.1
M1-5	14864	1793	3816	8.24	0.0857	9651	1828	3913	6.45	7993.43
M1-6	15476	1642	3312	8.17	0.3291	7927	1685	3433	6.5988	7430.32
M1-7	14087	1677	3598	9.319	0.3521	6299	1733	3790	6.79	7865.81
M1-8	10550	1649	3574	9.002	0.3538	4458	1692	3713	6.67775	10281.5
M1-9	10083	1686	3797	9.011	0.3588	4143	1729	3928	6.714	12528
M1-10	9753	1728	3838	9.03044	0.2606	4441	1784	3982	6.47	13375.3
M2-1	16381	1469	2801	8.0638	0.3472	7151	1529	2926	6.0369	7732.04
M2-2	8732	532	831.5	4.132	0.0464	7948	531	828	3.399	18745.2	The cell viability was low
M2-3	8571	849	1542	2.874	0.09884	6742	859	1570	2.388	11183.3	The cell viability was low
M2-4	12007	1913	4386	7.7708	0.02701	9485	1954	4548	6.1419	14070.8
M2-5	11956	1681	3369	5.733	0.023	10830	1703	3426	5.032	5425.62
M2-6	10588	1815	3966	7.233	0.0605	7922	1866	4144	5.941	13174.4	low TSS score
M2-7	9378	1925	4362	7.9977	0.0613	6752	1974	4544	6.2787	12997.3
M2-8	10701	1981	4618	6.996	0.122	8353	2013	4732	5.977	14119.6
M2-9	10015	1910	4435	7.465	0.081	6911	1947	4584	5.828	14718.7
M2-10	7693	2116	5019	7.494	0.2912	4441	2165	5198	6.148	18745.2
M2-11	9016	569	887	3.425	0.2369	6303	581	918	2.89	9741.27	The cell viability was low
M2-12	8004	638	1000	4.157	0.06	7057	654	1108	3.206	9313.36	The cell viability was low
M3-1	11650	508	888	37.2752	0.397	2642	1582	2984	9.88	11397.4	Different QC standards：MT<30
M3-2	13357	79	310	52.3007	0.662	3101	1588	3089	11.24	13255.6	Different QC standards：MT<30
M3-3	17057	80	338	56.6009	0.024	4569	1385	2474	10.277	12006.5	Different QC standards：MT<30
M3-4	12286	1952	4724	9.4395	0.0523	8766	2031	5058	5.95	15029.6	low TSS score
M3-5	10969	2067	5531	8.0758	0.046	8556	2106	5734	5.796	13707.8	low TSS score
M3-6	9701	2063	5195	8.0402	0.1212	6175	2099	5351	6.225	15325.9	low TSS score
M3-7	9916	1953	4814	8.3737	0.2875	5334	2001	5009	6.4112	17346.9
M3-8	9558	1800	4275	9.118	0.1884	4205	1866	4582	6.135	17998.4
M3-9	14314	1842	4336	7.6519	0.2267	8317	1872	4459	5.73	12687.3
M3-10	14032	1431	2751	7.8933	0.1216	7000	1487	2920	5.4553	9977.8
M5-1	10091	1763	3914	8.209	0.148	4441	1792	4005	6.1657	16283.2
M5-2	12351	1750	3982	9.204	0.1416	8126	1804	4152	6.25	15623.5
M5-3	11822	1778	3858	7.655	0.1576	8253	1814	3975	6.164	12017.7
M5-4	9365	1846	4157	7.405	0.0389	5508	1875	4268	5.925	16209
M5-5	8260	1783	3836	8.146	0.2152	3906	1821	3960	6.281	17828.7
M5-6	9450	1742	3808	7.488	0.0375	5308	1771	3904	6.2355	16108.3
M5-7	10577	1896	4184	7.735	0.0632	7947	1926	4287	6.4	16386.9
M5-8	11070	1664	3429	9.1713	0.2337	5036	1718	3589	6.771	13850.6
M5-9	12161	1423	2727	8.594	0.1846	7930	1460	2832	6.53092	14007.6
M5-10	15301	1384	2563	8.277	0.2948	7290	1456	2755	5.977	10638
mean	11678	1655	3879.53	10.6984	0.0419	10142.2	1804.47	4018.32	6.84405	12672.3
sum	443756				0.17769	278559
